# Supplementary material for: Valuing the ocean carbon sink at the country level
Source: Research Square preprint supplement (doi:10.21203/rs.3.rs-3232579/v1), 2023-08-11
Supplement: Supplementary file 3 [file M3_MACC_Calibration.xlsx]

## Sheet: readme
			Sectors for non EU ETS Macs		Country aggregation
MACs-EU-NETS	Data for MACs in non EU-ETS Sectors (= trn,agr,mfr,ser) + Haushold emission		Transport		Individual regions			For sectoral / regional details see:
			ATP.TRN Air transport		USA 'United States',
MAC-EU	Data for EU Mac as a whole region		WTP.TRN Water transport		CAN 'Canada',			https://www.gtap.agecon.purdue.edu/databases/contribute/detailedsector.asp
			OTP.TRN Transport nec		JPN 'Japan',			https://www.gtap.agecon.purdue.edu/databases/regions.aspx?version=10.211
MACs-non-EU	Data forother DARt regions as whole regions				KOR 'South Korea',
			* Agriculture		RUS 'Russia',
			PDR.AGR Paddy rice		CHN 'China',
Data			WHT.AGR Wheat		IND 'India',
			GRO.AGR Cereal grains nec		BRA 'Brazil',
PCO2	Carbon price in USD/tCO2		V_F.AGR Vegetables - fruit - nuts
Emission	MtCO2 (either fora ll non-EU-ETS sectors or on regional level)		OSD.AGR Oil seeds		* Europe
GDP	in Mrd USD		C_B.AGR Sugar cane - sugar beet		FRA 'France',
			PFB.AGR Plant-based fibers		GER 'Germany',
Lücken	Modell hat nicht gelöst, falls für Schätzung noch mehr benötigt, sind		OCR.AGR Crops nec		GBR 'Great Britain',
	neue Läufe möglich		CTL.AGR Bo horses		BLX 'Benelux',
			OAP.AGR Animal products nec		SEU 'Southern Europe',
1 Spalte	Bei allen daten bezeichnet 1. Spalte das Szenario. Es wurde die Emissions-		RMK.AGR Raw milk		SCA 'Scandinavia',
	reduktion variiert. Weil einfache zu implementieren sind es keine geraden		WOL.AGR Wool - silk-worm cocoons		EEU 'Eastern Europe',
	%-Reduktionen, aber fürs Schätzen sollte das egal sein.		FRS.AGR Forestry		REU 'Rest Europe (nonETS)',
	Szenario 0 jeweils ohne CO2 Einsparung /CO2 Preis		FSH.AGR Fishing
			CMT.AGR Bovine meat products		* Composite regions
			OMT.AGR Meat products		ANZ 'Australia and New Zealand',
			VOL.AGR Vegetable oils and fats		MEA 'Middle East',
			MIL.AGR Dairy products		AFR 'Africa',
			PCR.AGR Processed rice		OAM 'Other Americas',
			SGR.AGR Sugar		OAS 'Other Asia'
					*. ROW 'Rest of the World'
			* Manufactures:		/;
			OMN.mfr Minerals nec
			OFD.mfr Food products nec		* Composite European regions
			B_T.mfr Beverages and tobacco products		( ! Great Britain
			TEX.mfr Textiles		GBR ! United Kingdom
			WAP.mfr Wearing apparel		IRL ! Ireland
			LEA.mfr Leather products		).GBR,
			LUM.mfr Wood products
			FMP.mfr Metal products		( ! Benelux
			MVH.mfr Motor vehicles and parts		BEL ! Belgium
			OTN.mfr Transport equipment nec		NLD ! Netherlands
			* EEQ.mfr Electronic equipment		LUX ! Luxembourg
			ELE.mfr Electronic equipment		).BLX,
			OME.mfr Machinery and equipment nec
			OMF.mfr Manufactures nec		(! Southern Europe
					ITA ! Italy
					ESP ! Spain
			* Services:		PRT ! Portugal
			CNS.ser Construction		GRC ! Greece
			OSG.ser Public admin - and defence - education - health		AUT ! Austria
			WTR.ser Water		CYP ! Cyprus
			TRD.ser Trade		MLT ! Malta
			CMN.ser Communication		).SEU,
			OFI.ser Financial services nec
			ISR.ser Insurance		( ! Scandinavia
			OBS.ser Business services nec		DNK ! Denmark
			ROS.ser Recreational and other services		FIN ! Finland
			DWE.ser Ownership of dwellings		SWE ! Sweden
			TnD.ser Electricity transmission and distribution		NOR ! Norway
					).SCA,
					( ! Rest Europe ETS
					POL ! Poland
					CZE ! Czech Republic
					SVK ! Slovakia
					SVN ! Slovenia
					HUN ! Hungary
					LVA ! Latvia
					LTU ! Lithuania
					EST ! Estonia
					HRV ! Croatia
					ROU ! Romania
					BGR ! Bulgaria
					).EEU,
					( ! Rest Europe nonETS
					CHE ! Switzerland
					XEF ! Rest of EFTA
					ALB ! Albania
					BLR ! Belarus
					UKR ! Ukraine
					XEE ! Rest of Eastern Europe
					* Moldova Republic of
					XER ! Rest of Europe
					* Andorra
					* Bosnia and Herzegovina
					* Faroe Islands
					* Gibraltar
					* Guernsey
					* Holy See (Vatican City State)
					* Isle of Man
					* Jersey
					* Macedonia the former Yugoslav Republic of
					* Monaco
					* Montenegro
					* San Marino
					* Serbia
					).REU,
					* Composite non-European regions
					( ! Australia and New Zealand
					AUS ! Australia
					NZL ! New Zealand
					).ANZ,
					( ! Other Asia
					XOC ! Rest of Oceania
					XSA ! Rest of South Asia
					BGD ! Bangladesh
					BRN ! Brunei Darussalam
					KHM ! Cambodia
					IDN ! Indonesia
					LAO ! Lao People's Democratic Republic
					MYS ! Malaysia
					PHL ! Philippines
					SGP ! Singapore
					THA ! Thailand
					VNM ! Viet Nam
					XSE ! Rest of Southeast Asia
					XEA ! Rest of East Asia
					MNG ! Mongolia
					NPL ! Nepal
					PAK ! Pakistan
					LKA ! Sri Lanka
					TWN ! Taiwan
					KAZ ! Kazakhstan
					KGZ ! Kyrgyzstan
					XSU ! Rest of Former Soviet Union
					TJK ! Tajikistan
					* Turkmenistan
					* Uzbekistan
					ARM ! Armenia
					AZE ! Azerbaijan
					GEO ! Georgia
					XTW ! Rest of the World
					* Antarctica
					* Bouvet Island
					* British Indian Ocean Territory
					* French Southern Territories
					).OAS,
					( ! Middle East
					BHR ! Bahrain
					IRN ! Iran Islamic Republic of
					JOR ! Jordan
					KWT ! Kuwait
					OMN ! Oman
					QAT ! Qatar
					SAU ! Saudi Arabia
					ARE ! United Arab Emirates
					XWS ! Rest of Western Asia
					ISR ! Israel
					TUR ! Turkey
					).MEA
					( ! Africa
					EGY ! Egypt
					MAR ! Morocco
					TUN ! Tunisia
					XNF ! Rest of North Africa
					BEN ! Benin
					BFA ! Burkina Faso
					CMR ! Cameroon
					CIV ! Cote d'Ivoire
					GHA ! Ghana
					GIN ! Guinea
					NGA ! Nigeria
					SEN ! Senegal
					TGO ! Togo
					XWF ! Rest of Western Africa
					XCF ! Central Africa
					XAC ! South Central Africa
					ETH ! Ethiopia
					KEN ! Kenya
					MDG ! Madagascar
					MWI ! Malawi
					MUS ! Mauritius
					MOZ ! Mozambique
					RWA ! Rwanda
					TZA ! Tanzania United Republic of
					UGA ! Uganda
					ZMB ! Zambia
					ZWE ! Zimbabwe
					XEC ! Rest of Eastern Africa
					BWA ! Botswana
					NAM ! Namibia
					ZAF ! South Africa
					XSC ! Rest of South African Customs Union
					).AFR,
					( ! Other Americas
					MEX ! Mexico
					CHL ! Chile
					XNA ! Rest of North America
					ARG ! Argentina
					BOL ! Bolivia
					COL ! Colombia
					ECU ! Ecuador
					PRY ! Paraguay
					PER ! Peru
					URY ! Uruguay
					VEN ! Venezuela
					XSM ! Rest of South America
					CRI ! Costa Rica
					GTM ! Guatemala
					HND ! Honduras
					NIC ! Nicaragua
					PAN ! Panama
					SLV ! El Salvador
					XCA ! Rest of Central America
					DOM ! Dominican Republic
					JAM ! Jamaica
					PRI ! Puerto Rico
					TTO ! Trinidad and Tobago
					XCB ! Caribbean
					).OAM
					/;

## Sheet: Regions
Code	Description
AUS	Australia
	* Australia
	* Christmas Island
	* Cocos (Keeling) Islands
	* Heard Island and McDonald Islands
	* Norfolk Island
NZL	New Zealand
XOC	Rest of Oceania
	* American Samoa
	* Cook Islands
	* Fiji
	* French Polynesia
	* Guam
	* Kiribati
	* Marshall Islands
	* Micronesia, Federated States of
	* Nauru
	* New Caledonia
	* Niue
	* Northern Mariana Islands
	* Palau
	* Papua New Guinea
	* Pitcairn
	* Samoa
	* Solomon Islands
	* Tokelau
	* Tonga
	* Tuvalu
	* United States Minor Outlying Islands
	* Vanuatu
	* Wallis and Futuna Islands
CHN	China
HKG	Hong Kong, Special Administrative Region of China
JPN	Japan
KOR	Korea, Republic of
MNG	Mongolia
TWN	Taiwan
XEA	Rest of East Asia
	* Korea, Democratic People's Republic of
	* Macao, Special Administrative Region of China
BRN	Brunei Darussalam
KHM	Cambodia
IDN	Indonesia
LAO	Lao PDR
MYS	Malaysia
PHL	Philippines
SGP	Singapore
THA	Thailand
VNM	Viet Nam
XSE	Rest of Southeast Asia
	* Myanmar
	* Timor-Leste
BGD	Bangladesh
IND	India
NPL	Nepal
PAK	Pakistan
LKA	Sri Lanka
XSA	Rest of South Asia
	* Afghanistan
	* Bhutan
	* Maldives
CAN	Canada
USA	United States of America
MEX	Mexico
XNA	Rest of North America
	* Bermuda
	* Greenland
	* Saint Pierre and Miquelon
ARG	Argentina
BOL	Bolivia
BRA	Brazil
CHL	Chile
COL	Colombia
ECU	Ecuador
PRY	Paraguay
PER	Peru
URY	Uruguay
VEN	Venezuela (Bolivarian Republic of)
XSM	Rest of South America
	* Falkland Islands (Malvinas)
	* French Guiana
	* Guyana
	* South Georgia and the South Sandwich Islands
	* Suriname
CRI	Costa Rica
GTM	Guatemala
HND	Honduras
NIC	Nicaragua
PAN	Panama
SLV	El Salvador
XCA	Rest of Central America
	* Belize
DOM	Dominican Republic
JAM	Jamaica
PRI	Puerto Rico
TTO	Trinidad and Tobago
XCB	Rest of Caribbean
	* Anguilla
	* Antigua and Barbuda
	* Aruba
	* Bahamas
	* Barbados
	* British Virgin Islands
	* Cayman Islands
	* Cuba
	* Dominica
	* Grenada
	* Haiti
	* Montserrat
	* Netherlands Antilles
	* Saint Kitts and Nevis
	* Saint Lucia
	* Saint Vincent and Grenadines
	* Turks and Caicos Islands
	* Virgin Islands, US
AUT	Austria
BEL	Belgium
BGR	Bulgaria
HRV	Croatia
CYP	Cyprus
CZE	Czech Republic
DNK	Denmark
EST	Estonia
FIN	Finland
	* Aland Islands
	* Finland
FRA	France
	* France
	* Guadeloupe
	* Martinique
	* Réunion
DEU	Germany
GRC	Greece
HUN	Hungary
IRL	Ireland
ITA	Italy
LVA	Latvia
LTU	Lithuania
LUX	Luxembourg
MLT	Malta
NLD	Netherlands
POL	Poland
PRT	Portugal
ROU	Romania
SVK	Slovakia
SVN	Slovenia
ESP	Spain
SWE	Sweden
GBR	United Kingdom
CHE	Switzerland
NOR	Norway
	* Norway
	* Svalbard and Jan Mayen Islands
XEF	Rest of European Free Trade Association
	* Iceland
	* Liechtenstein
ALB	Albania
BLR	Belarus
RUS	Russian Federation
UKR	Ukraine
XEE	Rest of Eastern Europe
	* Moldova
XER	Rest of Europe
	* Andorra
	* Bosnia and Herzegovina
	* Faroe Islands
	* Gibraltar
	* Guernsey
	* Holy See (Vatican City State)
	* Isle of Man
	* Jersey
	* Monaco
	* Montenegro
	* North Macedonia
	* San Marino
	* Serbia
KAZ	Kazakhstan
KGZ	Kyrgyzstan
TJK	Tajikistan
XSU	Rest of Former Soviet Union
	* Turkmenistan
	* Uzbekistan
ARM	Armenia
AZE	Azerbaijan
GEO	Georgia
BHR	Bahrain
IRN	Iran, Islamic Republic of
ISR	Israel
JOR	Jordan
KWT	Kuwait
OMN	Oman
QAT	Qatar
SAU	Saudi Arabia
TUR	Türkiye
ARE	United Arab Emirates
XWS	Rest of Western Asia
	* Iraq
	* Lebanon
	* Palestinian Territory, Occupied
	* Syrian Arab Republic (Syria)
	* Yemen
EGY	Egypt
MAR	Morocco
TUN	Tunisia
XNF	Rest of North Africa
	* Algeria
	* Libya
	* Western Sahara
BEN	Benin
BFA	Burkina Faso
CMR	Cameroon
CIV	Côte d'Ivoire
GHA	Ghana
GIN	Guinea
NGA	Nigeria
SEN	Senegal
TGO	Togo
XWF	Rest of Western Africa
	* Cape Verde
	* Gambia
	* Guinea-Bissau
	* Liberia
	* Mali
	* Mauritania
	* Niger
	* Saint Helena
	* Sierra Leone
XCF	Rest of Central Africa
	* Central African Republic
	* Chad
	* Congo
	* Equatorial Guinea
	* Gabon
	* Sao Tome and Principe
XAC	South Central Africa
	* Angola
	* Congo, Democratic Republic of the
ETH	Ethiopia
KEN	Kenya
MDG	Madagascar
MWI	Malawi
MUS	Mauritius
MOZ	Mozambique
RWA	Rwanda
TZA	Tanzania, United Republic of
UGA	Uganda
ZMB	Zambia
ZWE	Zimbabwe
XEC	Rest of Eastern Africa
	* Burundi
	* Comoros
	* Djibouti
	* Eritrea
	* Mayotte
	* Seychelles
	* Somalia
	* Sudan
BWA	Botswana
NAM	Namibia
ZAF	South Africa
XSC	Rest of South African Customs Union
	* Eswatini
	* Lesotho
XTW	Rest of the World
	* Antarctica
	* Bouvet Island
	* British Indian Ocean Territory
	* French Southern Territories

## Sheet: alpha_i
Individual regions		Alpha
USA	United States	0.00595331
CAN	Canada	0.122403
JPN	Japan	0.0398103
KOR	South Korea	0.0540787
RUS	Russia	0.081395
CHN	China	0.0029864
IND	India	0.0126627
BRA	Brazil	0.150508
EU	EU27	0.0123894

## Sheet: alpha_i_split
		CO2	GDP_2020			alpha_i_a							alpha_i_b	0.1
		MtC	10^9 USD(2020)
FRA	France	88.309	2630.32			0.141148					11.1379		NA
DEU	Germany	191.582	3846.41			0.0406303					4.68843		NA
											0
GBR		111.08	3182.79	0.0302017	2	0.0726494	0.1	0.0941088	2.9568e-05		6.93683	GBR	0.0726494	6.93683
GBR	United Kingdom	100.949	2756.9	0.036617	3	0.0839369			3.10464e-05	0.0855919	6.94217	GBR	0.0838724	6.93683
IRL	Ireland	10.1304	425.889	0.0237864	1	0.756772			2.80896e-05	0.0119631	9.66903	GBR	0.54293	6.93683
											0
BLX		264.32	1508.9	0.169419	2	0.217927	0.1	0.318461	0.000211056		9.86486	EU	NA
BEL	Belgium	99.7089	521.677	0.191131	1	0.548821	0.1		0.000200503	0.104598	8.58922	EU	NA
NLD	Netherlands	154.827	913.865	0.169419	2	0.372045	0.1		0.000211056	0.192876	10.2	EU	NA
LUX	Luxembourg	9.78485	73.3531	0.133394	4	6.47559	0.1		0.000232161	0.0170297	14.2502	EU	NA
											0	EU
SEU		213.678	4064.3	0.0538155	4	0.307282	0.1	0.977772	0.000240576		37.4666	EU	NA
ITA	Italy	91.9995	1892.57	0.0486108	6	0.749377			0.000252605	0.478073	42.5475	EU	NA
ESP	Spain	68.9638	1281.48	0.0538155	4	0.952084			0.000240576	0.308294	36.6024	EU	NA
PRT	Portugal	13.2636	228.539	0.0580364	3	4.82658			0.000234561	0.0536065	33.0919	EU	NA
GRC	Greece	18.3362	188.835	0.0971018	1	3.31229			0.000222533	0.042022	18.7643	EU	NA
AUT	Austria	18.6941	433.258	0.0431477	7	3.77573			0.000258619	0.112049	49.076	EU	NA
CYP	Cyprus	1.99665	24.6921	0.080862	2	31.2405			0.000228547	0.0056433	23.1418	EU	NA
MLT	Malta	0.424066	14.917	0.0284283	8	170.316			0.000264633	0.00394755	76.2184	EU	NA
												EU
SCA	Scandinavia	44.2842	1553.33	0.0319802	3	0.220229	0.1	0.0555062	3.57338e-05		10.2626	EU	NA
DNK	Denmark	8.75423	356.085	0.0245847	5	1.18832			3.81161e-05	0.0135726	12.6943	EU	NA
FIN	Finland	11.3681	271.837	0.0418194	1	0.800708			3.33516e-05	0.00906619	6.52986	EU	NA
SWE	Sweden	11.6721	541.487	0.0215557	6	0.919109			3.93072e-05	0.0212843	14.9306	EU	NA
NOR	Norway	11.5832	362.198	0.0319802	3	0.841968			3.57338e-05	0.0129427	9.14879	EU	NA
ISL	Iceland	0.906566	21.7181	0.0417425	2	10.3992			3.45427e-05	0.000750201	6.77554	EU	NA
												EU
EEU	Eastern Europe	188.416	1654.92	0.0854961	6	0.061404	0.1	0.0701529	4.23906e-05		3.04856	EU	NA
POL	Poland	88.0531	596.624	0.147585	2	0.122633			3.95646e-05	0.0236052	2.19497	EU	NA
CZE	CzechRepublic	27.5682	245.339	0.112368	4	0.405679			4.09776e-05	0.0100534	2.98587	EU	NA
SVK	Slovakia	9.09246	105.173	0.0864528	5	1.25122			4.16841e-05	0.00438402	3.94782	EU	NA
SVN	Slovenia	3.73811	53.5896	0.0697543	10	3.30135			4.52166e-05	0.00242314	5.30754	EU	NA
HUN	Hungary	13.4009	156.743	0.0854961	6	0.863335			4.23906e-05	0.00664444	4.05965	EU	NA
LVA	Latvia	2.25501	33.6455	0.0670226	11	5.55813			4.59232e-05	0.00154511	5.61018	EU	NA
LTU	Lithuania	3.67997	56.547	0.0650781	12	3.4583			4.66297e-05	0.00263677	5.86669	EU	NA
EST	Estonia	3.79049	30.6503	0.123669	3	2.89963			4.02711e-05	0.00123432	2.66623	EU	NA
HRV	Croatia	4.88051	57.2038	0.0853179	8	2.44957			4.38036e-05	0.00250573	4.20374	EU	NA
ROU	Romania	20.4924	249.511	0.08213	9	0.592804			4.45101e-05	0.0111058	4.43734	EU	NA
BGR	Bulgaria	11.4646	69.8893	0.16404	1	0.925049			3.88581e-05	0.00271576	1.93953	EU	NA
REU	Rest Europe (nonETS)	116.787	1093.67	0.140521	6	0.233099	0.1	0.109087	9.97447e-05		7.64796	REU	0.233099	7.64796
CHE	Switzerland	10.2843	752.248	0.0136714	12	2.91175			0.000109719	0.082536	65.7108	REU	0.372783	8.41276
ALB	Albania	1.52266	15.1319	0.100626	9	18.7725			0.000104732	0.00158479	8.52188	REU	17.6897	8.03036
BLR	Belarus	17.0535	61.4896	0.277339	4	1.54312			9.64198e-05	0.00592882	2.84657	REU	4.00774	7.39303
UKR	Ukraine	60.9251	156.618	0.389004	1	0.40959			9.14326e-05	0.01432	1.92448	REU	1.49209	7.01063
MDA	Moldova	1.62604	11.8597	0.137106	8	17.2999			0.000103069	0.00122238	6.15516	REU	22.2121	7.9029
AND	Andorra	0.12841	2.891	0.0444172	11	229.666			0.000108057	0.000312392	19.9189	REU	95.5297	8.28529
BIH	Bosnia and Herzegovina	7.26558	19.9551	0.364096	2	3.49704			9.3095e-05	0.00185772	2.09352	REU	11.9236	7.1381
FRO	Faroe Islands	0.195143	3.24076	0.0602152	10	148.802			0.000106394	0.000344798	14.467	REU	83.9086	8.15783
MKD	Macedonia	2.1947	12.117	0.181126	5	12.1972			9.80823e-05	0.00118846	4.4338	REU	20.6886	7.5205
MNE	Montenegro	0.671791	4.78072	0.140521	6	40.5229			9.97447e-05	0.000476852	5.81186	REU	53.325	7.64796
SRB	Serbia	14.9199	53.335	0.27974	3	1.73337			9.47574e-05	0.00505389	2.77348	REU	4.54084	7.26557
AFR	Afrika	388.817	2460.56	0.094841	24	0.0337174	0.1	0.118192	4.80347e-05		2.48891	AFR	0.0337174	2.48891
EGY	Egypt	67.3152	365.253	0.184298	8	0.18177			4.48324e-05	0.0163752	1.99176	AFR	0.211998	2.32298
MAR	Morocco	19.6313	114.725	0.171116	9	0.62607			4.50326e-05	0.00516636	2.15478	AFR	0.677955	2.33335
TUN	Tunisia	8.46423	42.5142	0.199092	6	1.4327			4.44321e-05	0.00188899	1.8273	AFR	1.80508	2.30224
BEN	Benin	2.1829	15.6515	0.139469	15	5.78052			4.62334e-05	0.000723624	2.71422	AFR	5.10189	2.39558
BFA	BurkinaFaso	1.17393	17.9336	0.06546	32	11.5398			4.96359e-05	0.00089015	6.20849	AFR	4.78036	2.57187
CMR	Cameroon	2.07226	40.8044	0.0507851	41	6.77451			5.14372e-05	0.00209887	8.29291	AFR	2.17722	2.66521
CIV	Coted'Ivoire	3.53342	61.3486	0.0575958	36	3.89577			5.04365e-05	0.0030942	7.17	AFR	1.41995	2.61336
GHA	Ghana	4.08295	70.0432	0.0582918	35	3.35806			5.02363e-05	0.00351871	7.05628	AFR	1.23875	2.60299
GIN	Guinea	0.860645	14.1696	0.0607387	34	15.8673			5.00362e-05	0.000708994	6.74503	AFR	6.099	2.59261
NGA	Nigeria	38.2168	432.294	0.0884048	25	0.34447			4.82349e-05	0.0208516	4.46736	AFR	0.192715	2.49928
SEN	Senegal	2.68087	24.4932	0.109454	20	4.80866			4.72341e-05	0.00115691	3.53338	AFR	3.33076	2.44743
TGO	Togo	0.890129	7.57464	0.117514	17	14.2985			4.66337e-05	0.000353233	3.24918	AFR	10.6334	2.41632
ETH	Ethiopia	4.43645	107.658	0.0412088	44	3.2013			5.20376e-05	0.00560225	10.3393	AFR	0.834843	2.69632
KEN	Kenya	4.72578	100.667	0.0469449	42	2.98218			5.16373e-05	0.00519815	9.00619	AFR	0.885954	2.67558
MDG	Madagascar	1.09575	13.2256	0.0828508	28	12.1637			4.88353e-05	0.000645876	4.82617	AFR	6.37751	2.53039
MWI	Malawi	0.400203	12.1721	0.0328786	48	36.034			5.28382e-05	0.000643153	13.1583	AFR	7.49746	2.7378
MUS	Mauritius	1.27915	10.9268	0.117065	18	9.99269			4.68339e-05	0.000511745	3.27565	AFR	7.40285	2.42669
MOZ	Mozambique	2.37604	14.0288	0.169369	10	5.19569			4.52327e-05	0.000634561	2.18668	AFR	5.56883	2.34372
RWA	Rwanda	0.303197	10.1843	0.0297709	49	47.743			5.30383e-05	0.000540161	14.5869	AFR	8.99476	2.74817
TZA	TanzaniaUnitedRepublicof	3.17312	62.4097	0.0508433	40	4.40699			5.1237e-05	0.00319769	8.25117	AFR	1.41796	2.65484
UGA	Uganda	1.50962	37.6004	0.0401492	45	9.44409			5.22378e-05	0.00196416	10.653	AFR	2.39952	2.70669
ZMB	Zambia	1.83419	18.1106	0.101277	23	7.11772			4.78346e-05	0.000866314	3.86719	AFR	4.56185	2.47854
ZWE	Zimbabwe	2.83141	18.0512	0.156855	11	4.37937			4.54328e-05	0.000820116	2.37158	AFR	4.34708	2.35409
BWA	Botswana	1.72391	14.9301	0.115465	19	7.44634			4.7034e-05	0.000702221	3.33523	AFR	5.44105	2.43706
NAM	Namibia	1.13756	10.5626	0.107696	21	11.3806			4.74343e-05	0.000501031	3.60626	AFR	7.75627	2.4578
ZAF	SouthAfrica	130.624	335.442	0.38941	1	0.0907452			4.34314e-05	0.0145687	0.913193	AFR	0.223624	2.25039
DZA	Algeria	46.8633	145.009	0.323175	2	0.254105			4.36315e-05	0.00632697	1.10542	AFR	0.519682	2.26076
LBY	Libya	12.6713	52.3202	0.242188	5	0.952705			4.4232e-05	0.00231423	1.49537	AFR	1.46016	2.29187
CPV	Cape Verde	0.173005	1.7037	0.101547	22	75.1462			4.76344e-05	8.11547e-05	3.84079	AFR	48.2904	2.46817
GMB	Gambia	0.159856	1.83041	0.0873333	26	82.6942			4.8435e-05	8.86561e-05	4.54093	AFR	45.7028	2.50965
GNB	Guinea-Bissau	0.0875975	1.43176	0.0611818	33	155.273			4.9836e-05	7.13531e-05	6.66941	AFR	60.1183	2.58224
LBR	Liberia	0.360721	3.03998	0.118659	16	35.1322			4.64336e-05	0.000141157	3.20404	AFR	26.3811	2.40595
MLI	Mali	0.926422	17.4654	0.0530433	39	15.0356			5.10369e-05	0.000891379	7.87806	AFR	5.04706	2.64447
MRT	Mauritania	1.11687	7.91599	0.14109	14	11.249			4.60333e-05	0.000364399	2.67141	AFR	10.0438	2.38521
NER	Niger	0.582772	13.7414	0.04241	43	24.2767			5.18375e-05	0.000712318	10.0079	AFR	6.51548	2.68595
SLE	Sierra Leone	0.280312	4.06329	0.0689865	30	47.9382			4.92356e-05	0.000200058	5.84361	AFR	20.9283	2.55113
CAF	Central African Republic	0.0839663	2.32672	0.0360878	46	170.445			5.24379e-05	0.000122008	11.8974	AFR	38.9255	2.71706
TCD	Chad	0.281187	10.7154	0.0262414	51	51.8687			5.34386e-05	0.000572616	16.6738	AFR	8.6135	2.76891
COD	Congo	0.623013	48.717	0.0127884	53	23.5854			5.38389e-05	0.00262287	34.4703	AFR	1.90875	2.78965
GNQ	Equatorial Guinea	1.5376	10.0992	0.152251	12	8.09989			4.5633e-05	0.000460855	2.45406	AFR	7.80416	2.36446
GAB	Gabon	1.2841	15.3168	0.0838358	27	10.3371			4.86352e-05	0.000744936	4.74992	AFR	5.48421	2.52002
STP	Sao Tome and Principe	0.0352451	0.472914	0.0745275	29	379.713			4.90354e-05	2.31896e-05	5.38716	AFR	179.085	2.54076
AGO	Angola	10.3767	53.6191	0.193527	7	1.17391			4.46323e-05	0.00239314	1.88831	AFR	1.43768	2.31261
COD	Congo	0.623013	48.717	0.0127884	53	23.5854			5.38389e-05	0.00262287	34.4703	AFR	1.90875	2.78965
BDI	Burundi	0.158238	2.78051	0.0569098	37	87.3368			5.06366e-05	0.000140796	7.28523	AFR	31.4538	2.62373
COM	Comoros	0.0690814	1.22388	0.0564447	38	200.845			5.08367e-05	6.22179e-05	7.37429	AFR	71.7419	2.6341
DJI	Djibouti	0.108999	3.18107	0.0342649	47	131.802			5.2638e-05	0.000167445	12.5781	AFR	28.5798	2.72743
ERI	Eritrea	0.198481	0.706371	0.280987	3	60.2718			4.38317e-05	3.09614e-05	1.27723	AFR	107.174	2.27113
SYC	Seychelles	0.170046	1.20063	0.14163	13	73.5625			4.58331e-05	5.50288e-05	2.64965	AFR	65.9328	2.37484
SOM	Somalia	0.184925	6.96529	0.0265496	50	78.573			5.32385e-05	0.000370821	16.4185	AFR	13.2014	2.75854
SDN	Sudan	0.432556	26.9876	0.016028	52	33.844			5.36388e-05	0.00144758	27.401	AFR	3.43279	2.77928
SWZ	Eswatini	0.265788	3.98484	0.0666998	31	50.7633			4.94357e-05	0.000196994	6.06851	AFR	21.4271	2.5615
LSO	Lesotho	0.606777	2.25072	0.269593	4	19.8053			4.40318e-05	9.91032e-05	1.33729	AFR	33.7892	2.2815
OAM	Other Americans	326.588	3294.38	0.103195	12	0.0376558	0.1	0.148444	4.50597e-05		3.72158	OAM	0.0376558	3.72158
MEX	Mexico	119.677	1087.12	0.110087	10	0.101047			4.43087e-05	0.0481688	3.29549	OAM	0.11221	3.65955
CHL	Chile	22.9985	252.727	0.0910014	15	0.548096			4.61862e-05	0.0116725	4.15556	OAM	0.503127	3.81462
ARG	Argentina	48.8372	389.591	0.125355	5	0.237126			4.24312e-05	0.0165308	2.77147	OAM	0.299843	3.50449
BOL	Bolivia	6.16126	36.6298	0.168203	3	1.84631			4.16802e-05	0.00152674	2.0289	OAM	3.13266	3.44246
COL	Colombia	27.8937	270.3	0.103195	12	0.440887			4.50597e-05	0.0121796	3.57515	OAM	0.458944	3.72158
ECU	Ecuador	11.0645	99.2911	0.111435	9	1.08369			4.39332e-05	0.00436218	3.22803	OAM	1.21815	3.62854
PRY	Paraguay	2.25772	35.4322	0.0637195	20	5.81021			4.80637e-05	0.001703	6.17605	OAM	3.73454	3.96969
PER	Peru	14.8835	201.705	0.0737885	16	0.853823			4.65617e-05	0.00939173	5.16662	OAM	0.635521	3.84563
URY	Uruguay	1.74075	53.5608	0.0325005	23	7.71234			4.91902e-05	0.00263466	12.3924	OAM	2.52842	4.06273
CRI	CostaRica	2.32192	62.158	0.0373552	22	5.73783			4.88147e-05	0.00303422	10.6996	OAM	2.16208	4.03171
GTM	Guatemala	5.59865	77.6046	0.0721432	17	2.28812			4.69372e-05	0.00364254	5.32706	OAM	1.66513	3.87665
HND	Honduras	2.98265	23.8278	0.125175	6	3.91701			4.28067e-05	0.00101999	2.80002	OAM	4.9459	3.5355
NIC	Nicaragua	1.51436	12.5869	0.120312	7	7.78251			4.31822e-05	0.000543532	2.93874	OAM	9.44501	3.56651
PAN	Panama	3.41242	53.977	0.0632198	21	3.87417			4.84392e-05	0.0026146	6.27349	OAM	2.47062	4.0007
SLV	ElSalvador	1.69413	24.6387	0.0687589	18	7.62211			4.73127e-05	0.00116572	5.63397	OAM	5.28661	3.90766
DOM	DominicanRepublic	7.47238	78.8447	0.0947734	14	1.67322			4.58107e-05	0.00361193	3.95773	OAM	1.5996	3.78361
JAM	Jamaica	2.18728	13.8124	0.158356	4	5.24766			4.20557e-05	0.000580892	2.17449	OAM	8.38249	3.47347
TTO	TrinidadandTobago	10.334	21.3925	0.483067	1	1.08096			4.09292e-05	0.00087558	0.693732	OAM	5.26731	3.38044
VEN	Venezuela	31.8471	482.359	0.0660236	19	0.408682			4.76882e-05	0.0230028	5.91395	OAM	0.272181	3.93867
BMU	Bermuda	0.172478	6.88166	0.0250634	24	78.4317			4.95657e-05	0.000341094	16.1922	OAM	19.8292	4.09374
GUY	Guyana	0.652401	5.47126	0.119242	8	18.222			4.35577e-05	0.000238315	2.99091	OAM	21.9177	3.59753
SUR	Suriname	0.711254	2.88425	0.246599	2	15.8496			4.13047e-05	0.000119133	1.37143	OAM	39.4262	3.41145
BLZ	Belize	0.172707	1.58563	0.10892	11	70.6139			4.46842e-05	7.08527e-05	3.35903	OAM	77.5835	3.69057
ANZ	Aust/NZ	122.15	1539.57	0.0657911	2	0.0511926	0.1	0.035274	2.29116e-05		2.36444	ANZ	0.0511926	2.36444
AUS	Australia	112.177	1327.84	0.0844809	1	0.0529567			2.1766e-05	0.0289017	2.10953	ANZ	0.0563879	2.24622
NZL	NewZealand	9.97297	211.735	0.0471013	3	0.658362			2.40572e-05	0.00509373	4.18194	ANZ	0.0623235	2.48266
OAS	Other Asia	727.033	4304.46	0.134669	21	0.0167145	0.1	0.191655	4.45248e-05		2.1584	OAS	0.0167145	2.1584
FJI	Fiji	0.61603	4.57441	0.134669	21	19.7263			4.45248e-05	0.000203675	2.70708	OAS	15.7281	2.1584
PYF	French Polynesia	0.226986	5.66937	0.0400373	40	58.38			4.85533e-05	0.000275266	9.92933	OAS	13.8386	2.35368
KIR	Kiribati	0.0200282	0.180912	0.110707	27	624.079			4.5797e-05	8.28521e-06	3.3871	OAS	409.052	2.22007
MHL	Marshall Islands	0.0445071	0.244462	0.182061	15	265.234			4.32527e-05	1.05737e-05	1.94519	OAS	285.897	2.09673
FSM	Micronesia	0.0433944	0.407516	0.106485	29	290.704			4.6221e-05	1.88358e-05	3.55399	OAS	183.275	2.24063
NRU	Nauru	0.0144648	0.114627	0.126191	24	852.108			4.51609e-05	5.17664e-06	2.93023	OAS	636.628	2.18923
NCL	New Caledonia	2.30666	9.43553	0.244465	9	4.96717			4.19805e-05	0.000396109	1.40604	OAS	7.18936	2.03506
PLW	Palau	0.0700986	0.2577	0.272016	7	161.798			4.15565e-05	1.07091e-05	1.25086	OAS	260.575	2.01451
PNG	Papua New Guinea	1.93418	24.6671	0.0784117	35	6.70158			4.74931e-05	0.00117152	4.95925	OAS	3.11116	2.30229
WSM	Samoa	0.0778874	0.807148	0.0964971	31	163.449			4.6645e-05	3.76494e-05	3.95783	OAS	93.3816	2.26118
SLB	Solomon Islands	0.0867888	1.54589	0.0561417	38	151.353			4.81292e-05	7.44024e-05	7.01922	OAS	50.3083	2.33313
TON	Tonga	0.0478451	0.48883	0.0978768	30	264.871			4.6433e-05	2.26979e-05	3.8843	OAS	153.489	2.2509
TUV	Tuvalu	0.00333803	0.0550547	0.0606311	37	3917.83			4.79172e-05	2.63807e-06	6.47085	OAS	1406.39	2.32285
VUT	Vanuatu	0.0422817	0.896828	0.0471458	39	312.04			4.83412e-05	4.33538e-05	8.39537	OAS	87.0998	2.34341
AFG	Afghanistan	2.92585	20.1161	0.145448	20	4.13353			4.43128e-05	0.000891402	2.49452	OAS	3.55953	2.14812
BTN	Bhutan	0.465836	2.31544	0.201187	13	25.0926			4.28286e-05	9.9167e-05	1.74301	OAS	29.8889	2.07618
MDV	Maldives	0.455085	3.74277	0.12159	25	27.2113			4.53729e-05	0.00016982	3.05537	OAS	19.589	2.19951
BGD	Bangladesh	27.8826	373.902	0.0745718	36	0.466958			4.77052e-05	0.0178371	5.23789	OAS	0.206166	2.31257
BRN	BruneiDarussalam	2.48054	12.0058	0.206611	11	4.66564			4.24046e-05	0.000509102	1.68045	OAS	5.70728	2.05562
KHM	Cambodia	4.37417	25.8728	0.169065	17	2.7252			4.36767e-05	0.00113004	2.11526	OAS	2.72782	2.11729
IDN	Indonesia	168.535	1058.69	0.159192	18	0.0710734			4.38887e-05	0.0464645	2.25734	OAS	0.0669875	2.12757
LAO	LaoPeople'sDemocraticRepublic	8.956	18.9818	0.47182	4	1.24701			4.09204e-05	0.000776743	0.710116	OAS	3.48346	1.98367
MYS	Malaysia	68.2573	337.006	0.20254	12	0.170402			4.26166e-05	0.0143621	1.72279	OAS	0.204338	2.0659
PHL	Philippines	39.373	361.751	0.10884	28	0.318925			4.6009e-05	0.0166438	3.46114	OAS	0.205514	2.23035
SGP	Singapore	10.629	345.296	0.0307824	41	1.25216			4.87653e-05	0.0168385	12.971	OAS	0.228206	2.36396
THA	Thailand	78.679	499.682	0.157458	19	0.152979			4.41008e-05	0.0220364	2.29323	OAS	0.142614	2.13784
VNM	VietNam	67.6061	343.243	0.196963	14	0.173755			4.30407e-05	0.0147734	1.7892	OAS	0.202622	2.08645
MMR	Myanmar	7.15927	78.9303	0.0907038	32	1.78629			4.68571e-05	0.00369844	4.22976	OAS	0.959269	2.27146
TLS	Timor-Leste	0.151324	1.90216	0.0795539	34	85.2755			4.72811e-05	8.99361e-05	4.86622	OAS	40.1652	2.29202
MAC	Macao	0.563499	25.5861	0.0220236	42	23.7217			4.89773e-05	0.00125314	18.2084	OAS	3.09314	2.37424
MNG	Mongolia	17.8804	13.313	1.34308	1	0.6149			4.02844e-05	0.000536305	0.245584	OAS	4.88956	1.95284
NPL	Nepal	3.79736	33.4337	0.113579	26	3.2763			4.55849e-05	0.00152407	3.28617	OAS	2.20316	2.20979
PAK	Pakistan	67.9159	300.306	0.226155	10	0.169554			4.21926e-05	0.0126707	1.52755	OAS	0.227028	2.04534
LKA	SriLanka	6.77979	80.9697	0.0837325	33	1.8948			4.70691e-05	0.00381117	4.60265	OAS	0.939338	2.28174
KAZ	Kazakhstan	85.6435	171.082	0.500598	3	0.129728			4.07084e-05	0.00696449	0.665826	OAS	0.384492	1.97339
KGZ	Kyrgyzstan	3.13389	7.78087	0.402769	5	3.58216			4.11325e-05	0.000320046	0.83617	OAS	8.5421	1.99395
UZB	Uzbekistan	30.089	59.8943	0.502368	2	0.367327			4.04964e-05	0.0024255	0.660025	OAS	1.09255	1.96312
TJK	Tajikistan	2.45084	8.134	0.301308	6	4.60412			4.13445e-05	0.000336296	1.1235	OAS	8.21338	2.00423
ARM	Armenia	1.63917	12.6412	0.129669	23	7.48408			4.49489e-05	0.000568208	2.83824	OAS	5.74564	2.17896
AZE	Azerbaijan	10.8679	42.693	0.25456	8	1.04893			4.17685e-05	0.00178322	1.34346	OAS	1.58089	2.02479
GEO	Georgia	2.8075	15.8429	0.177208	16	4.22534			4.34647e-05	0.000688608	2.00825	OAS	4.43313	2.10701
MEA	Middle East	716.03	3049.45	0.22589	7	0.0475999	0.1	0.380816	0.00012488		4.35461	MEA	0.0475999	4.35461
BHR	Bahrain	9.37618	34.7234	0.270025	5	3.5312			0.000121312	0.00421236	3.67845	MEA	4.06086	4.2302
IRN	Iran, Islamic Republic of	212.753	231.548	0.91883	1	0.146468			0.000114176	0.0264372	1.01743	MEA	0.573152	3.98136
JOR	Jordan	7.11561	43.6977	0.162837	10	4.99517			0.000130232	0.00569084	6.54832	MEA	3.46414	4.54124
KWT	Kuwait	29.3483	105.96	0.276974	4	1.11156			0.000119528	0.0126652	3.53343	MEA	1.31118	4.16799
OMN	Oman	19.5646	73.9714	0.264488	6	1.71719			0.000123096	0.00910558	3.81069	MEA	1.93426	4.2924
QAT	Qatar	29.843	144.411	0.206653	9	1.17471			0.000128448	0.0185494	5.08923	MEA	1.03386	4.47903
SAU	Saudi Arabia	158.884	703.368	0.22589	7	0.214515			0.00012488	0.0878366	4.5265	MEA	0.20637	4.35461
ARE	United Arab Emirates	52.0423	358.869	0.145018	12	0.701688			0.0001338	0.0480167	7.55442	MEA	0.433367	4.66566
IRQ	Iraq	60.4214	184.37	0.327718	2	0.523796			0.00011596	0.0213795	2.89716	MEA	0.731062	4.04357
LBN	Lebanon	7.69707	25.9489	0.296624	3	4.17501			0.000117744	0.00305533	3.25011	MEA	5.27418	4.10578
PSE	Palestine	0.901534	15.5317	0.0580448	13	41.046			0.000135584	0.00210585	19.1254	MEA	10.1467	4.72787
ISR	Israel	17.5142	407.101	0.0430218	14	2.14062			0.000137368	0.0559226	26.1434	MEA	0.39221	4.79008
TUR	Turkey	110.569	719.955	0.153578	11	0.325864			0.000132016	0.0950456	7.03822	MEA	0.213136	4.60345
Individual regions		Alpha
USA	United States					0.00595331						USA	0.00595331
CAN	Canada					0.122403						CAN	0.122403
JPN	Japan					0.0398103						JPN	0.0398103
KOR	South Korea					0.0540787						KOR	0.0540787
RUS	Russia					0.081395						RUS	0.081395
CHN	China					0.0029864						CHN	0.0029864
IND	India					0.0126627						IND	0.0126627
BRA	Brazil					0.150508						BRA	0.150508
EU	EU29					0.0123894						EU	0.0123894

## Sheet: CO2
	MtC			2018	2019	2020	2021
AFGHANISTAN	Afghanistan	AFG		2.8528	2.92585	3.18825	3.24078
ALBANIA	Albania	ALB		1.47462	1.52266	1.29055	1.26067
ALGERIA	Algeria	DZA		44.8442	46.8633	47.0809	48.1084
ANDORRA	Andorra	AND		0.126695	0.12841	0.122512	0.123605
ANGOLA	Angola	AGO		10.2835	10.3767	5.53377	5.83044
ANGUILLA	Anguilla	AIA		0.0401595	0.0391084	0.0358597	0.0395044
ANTIGUA & BARBUDA	Antigua	ATG		0.137984	0.134372	0.116117	0.127919
ARGENTINA	Argentina	ARG		50.4994	48.8372	46.1962	50.8865
ARMENIA	Armenia	ARM		1.71851	1.63917	1.75509	1.85755
ARUBA	Aruba	ABW		0.257433	0.250695	0.212597	0.234205
AUSTRALIA	Australia	AUS		113.525	112.177	109.149	106.765
AUSTRIA	Austria	AUT		18.2095	18.6941	16.9316	17.638
AZERBAIJAN	Azerbaijan	AZE		10.2315	10.8679	10.2369	10.5057
BAHAMAS	Bahamas	BHS		0.554042	0.540161	0.591341	0.651327
BAHRAIN	Bahrain	BHR		8.62295	9.37618	10.2628	10.6485
BANGLADESH	Bangladesh	BGD		23.3949	27.8826	24.7886	25.4301
BARBADOS	Barbados	BRB		0.329458	0.323854	0.278817	0.307124
BELARUS	Belarus	BLR		16.8864	17.0535	15.9913	16.267
BELGIUM	Belgium	BEL		27.3493	27.2131	24.6638	26.1251
BELIZE	Belize	BLZ		0.167087	0.172707	0.16776	0.188134
BENIN	Benin	BEN		2.11784	2.1829	1.98248	2.11676
BERMUDA	Bermuda	BMU		0.177114	0.172478	0.135755	0.149552
BHUTAN	Bhutan	BTN		0.453649	0.465836	0.409305	0.415416
BONAIRE, SAINT EUSTATIUS, AND SABA	Bonaire, Saint Eustatius and Saba	BQ		0.0937056	0.0912529	0.0256141	0.0282174
BOSNIA & HERZEGOVINA	Bosnia and Herzegovina	BIH		6.02787	7.26558	5.71314	3.7026
BOTSWANA	Botswana	BWA		1.8601	1.72391	1.70813	1.774
BRAZIL	Brazil	BRA		127.361	127.106	120.717	133.428
BRITISH VIRGIN ISLANDS	British Virgin	VGB		0.0473677	0.0461278	0.0392749	0.0432667
BRUNEI (DARUSSALAM)	Brunei	BRN		2.60928	2.48054	2.88023	2.8604
BULGARIA	Bulgaria	BGR		11.8864	11.4646	10.0893	11.6158
BURKINA FASO	Burkina Faso	BFA		1.13001	1.17393	1.47079	1.5552
BURUNDI	Burundi	BDI		0.155029	0.158238	0.179347	0.189112
CAMBODIA	Cambodia	KHM		4.22463	4.37417	5.10461	5.19339
CANADA	Canada	CAN		160.072	157.383	145.978	148.918
CAPE VERDE	Cape Verde	CPV		0.166351	0.173005	0.1706	0.182231
CENTRAL AFRICAN REPUBLIC	Central African Republic	CAF		0.0820081	0.0839663	0.058472	0.0620349
CHAD	Chad	TCD		0.275119	0.281187	0.491866	0.529453
CHILE	Chile	CHL		23.425	22.9985	22.8804	23.3207
CHINA (MAINLAND)	China	CHN		2717.4	2776.93	2990.23	3131.11
COLOMBIA	Colombia	COL		25.1715	27.8937	23.3421	25.0282
COMOROS	Comoros	COM		0.0671199	0.0690814	0.0770976	0.0813786
CONGO	Congo	COG		0.960237	0.943499	2.05509	2.03722
COOK ISLANDS	Cook Islands	COK		0.0198433	0.0211409	0.0242746	0.0249463
COSTA RICA	Costa Rica	CRI		2.2514	2.32192	1.93279	2.13414
COTE D IVOIRE	Côte d'Ivoire	CIV		3.41541	3.53342	2.99232	3.19504
CROATIA	Croatia	HRV		4.83587	4.88051	4.6044	4.83118
CUBA	Cuba	CUB		7.11912	7.09292	5.38542	6.02001
CURACAO	Curacao	CUW		1.43816	1.41807	0.456784	0.503211
CYPRUS	Cyprus	CYP		2.0013	1.99665	1.98406	2.07435
CZECH REPUBLIC	Czech Republic	CZE		28.4965	27.5682	25.0693	26.5116
DEMOCRATIC PEOPLE S REPUBLIC OF KOREA	DemocraticKorea	PRK		10.4156	10.5792	15.1028	15.3876
DEMOCRATIC REPUBLIC OF THE CONGO (FORMERLY ZAIRE)	Democratic Republic of the Congo	COD		0.608991	0.623013	0.677642	0.711432
DENMARK	Denmark	DNK		9.45727	8.75423	7.71889	8.07231
DJIBOUTI	Djibouti	DJI		0.106434	0.108999	0.099156	0.103487
DOMINICA	Dominica	DMA		0.0453082	0.0441223	0.0392749	0.0432667
DOMINICAN REPUBLIC	Dominican Republic	DOM		6.90645	7.47238	7.19974	7.89358
ECUADOR	Ecuador	ECU		11.4132	11.0645	9.40433	11.2778
EGYPT	Egypt	EGY		68.6302	67.3152	64.3613	68.1289
EL SALVADOR	El Salvador	SLV		1.64254	1.69413	1.77428	1.96626
EQUATORIAL GUINEA	Equatorial Guinea	GNQ		1.61184	1.5376	1.36166	1.42598
ERITREA	Eritrea	ERI		0.193441	0.198481	0.213739	0.223963
ESTONIA	Estonia	EST		4.83378	3.79049	2.54995	2.85181
ETHIOPIA	Ethiopia	ETH		4.41729	4.43645	4.65086	4.85605
FAEROE ISLANDS	Faroe	FRO		0.192536	0.195143	0.188912	0.190597
FEDERATED STATES OF MICRONESIA	Micronesia	FSM		0.0407311	0.0433944	0.0422167	0.0433849
FIJI	Fiji	FJI		0.579631	0.61603	0.390504	0.401311
FINLAND	Finland	FIN		12.5135	11.3681	10.2609	10.2626
FRANCE (INCLUDING MONACO)	France	FRA		90.4865	88.309	76.4278	83.5054
FRENCH GUIANA	French Guiana	GUF		0.00791277	0.00791277	0.177779	0.177779
FRENCH POLYNESIA	French Polynesia	PYF		0.213055	0.226986	0.252245	0.259225
GABON	Gabon	GAB		1.31089	1.2841	1.55372	1.55908
GAMBIA	Gambia	GMB		0.153723	0.159856	0.167536	0.178957
GEORGIA	Georgia	GEO		2.69164	2.8075	2.91774	3.00486
GERMANY	Germany	DEU		206.158	191.582	174.504	184.158
GHANA	Ghana	GHA		3.95196	4.08295	5.36418	5.81681
GREECE	Greece	GRC		19.5955	18.3362	15.1775	15.3683
GREENLAND	Greenland	GRL		0.139664	0.141555	0.136593	0.139372
GRENADA	Grenada	GRD		0.0760364	0.0785891	0.0780459	0.0871206
GUADELOUPE	Guadeloupe	GLP				0.625291	0.625291
GUATEMALA	Guatemala	GTM		5.29785	5.59865	4.80229	5.54779
GUINEA	Guinea	GIN		0.827542	0.860645	1.23711	1.32145
GUINEA BISSAU	Guinea-Bissau	GNB		0.0842282	0.0875975	0.0898972	0.0960258
GUYANA	Guyana	GUY		0.639364	0.652401	0.870896	0.842747
HAITI	Haiti	HTI		0.918931	0.895429	0.714449	0.784914
HONDURAS	Honduras	HND		2.85772	2.98265	2.68673	2.97429
HONG KONG SPECIAL ADMINSTRATIVE REGION OF CHINA	HongKong	HKG		11.6009	11.3363	8.59847	8.64202
HUNGARY	Hungary	HUN		13.5449	13.4009	12.9052	13.2245
ICELAND	Iceland	ISL		1.00287	0.906566	0.908536	0.921115
INDIA	India	IND		707.239	713.925	667.307	739.542
INDONESIA	Indonesia	IDN		157.365	168.535	166.426	169.017
IRAQ	Iraq	IRQ		57.6611	60.4214	47.3545	50.6498
IRELAND	Ireland	IRL		10.5904	10.1304	9.59421	10.2457
ISLAMIC REPUBLIC OF IRAN	Iran	IRN		206.169	212.753	199.23	204.388
ISRAEL	Israel	ISR		16.9794	17.5142	15.0131	14.8822
ITALY (INCLUDING SAN MARINO)	Italy	ITA		95.0014	91.9995	82.4996	89.7072
JAMAICA	Jamaica	JAM		2.18604	2.18728	1.89506	2.09873
JAPAN	Japan	JPN		309.959	302.037	284.45	291.321
JORDAN	Jordan	JOR		6.80235	7.11561	6.80736	6.98518
KAZAKHSTAN	Kazakhstan	KAZ		87.24	85.6435	75.9838	75.514
KENYA	Kenya	KEN		4.67705	4.72578	4.98795	5.42451
KIRIBATI	Kiribati	KIR		0.0187989	0.0200282	0.0189975	0.0195232
	Kosovo	XXK		2.23579	2.65869	2.32581	1.54049
KUWAIT	Kuwait	KWT		28.4437	29.3483	27.2322	28.9668
KYRGYZSTAN	Kyrgyzstan	KGZ		2.77535	3.13389	2.31679	2.54042
LAO PEOPLE S DEMOCRATIC REPUBLIC	Laos	LAO		8.80525	8.956	5.59165	5.67072
LATVIA	Latvia	LVA		2.145	2.25501	1.90887	1.98314
LEBANON	Lebanon	LBN		7.52332	7.69707	6.6799	6.81193
LESOTHO	Lesotho	LSO		0.661997	0.606777	0.597174	0.622862
LIBERIA	Liberia	LBR		0.347833	0.360721	0.307692	0.326217
LIBYAN ARAB JAMAHIRIYAH	Libya	LBY		12.3379	12.6713	15.9839	20.3398
LIECHTENSTEIN	Liechtenstein	LIE		0.039233	0.0397933	0.0387544	0.0411982
LITHUANIA	Lithuania	LTU		3.73076	3.67997	3.7263	3.78844
LUXEMBOURG	Luxembourg	LUX		2.6115	2.67054	2.20975	2.28017
MACAU SPECIAL ADMINSTRATIVE REGION OF CHINA	Macao	MAC		0.604928	0.563499	0.347105	0.351193
MACEDONIA	Macedonia	MKD		1.90527	2.1947	1.81482	1.86996
MADAGASCAR	Madagascar	MDG		1.14296	1.09575	1.09186	1.15839
MALAWI	Malawi	MWI		0.40127	0.400203	0.401638	0.423634
MALAYSIA	Malaysia	MYS		67.998	68.2573	70.8191	69.8824
MALDIVES	Maldives	MDV		0.427154	0.455085	0.562537	0.578104
MALI	Mali	MLI		0.893361	0.926422	1.07215	1.13803
MALTA	Malta	MLT		0.418008	0.424066	0.436566	0.470566
MARSHALL ISLANDS	Marshall	MHL		0.0417754	0.0445071	0.0422167	0.0433849
MARTINIQUE	Martinique	MTQ		0.0155593	0.0155593	0.573184	0.573184
MAURITANIA	Mauritania	MRT		1.07391	1.11687	1.05221	1.12394
MAURITIUS	Mauritius	MUS		1.33778	1.27915	1.14857	1.22043
MAYOTTE	Mayotte	MYT				0.0745854	0.0745854
MEXICO	Mexico	MEX		123.112	119.677	106.907	111.137
MONGOLIA	Mongolia	MNG		17.606	17.8804	13.5385	13.7325
MONTENEGRO	Montenegro	MNE		0.579461	0.671791	0.669012	0.477998
MONTSERRAT	Montserrat	MSR		0.00823786	0.00802223	0.00512281	0.00564349
MOROCCO	Morocco	MAR		17.8405	19.6313	17.6638	19.2625
MOZAMBIQUE	Mozambique	MOZ		2.28807	2.37604	1.82025	1.95311
MYANMAR (FORMERLY BURMA)	Myanmar	MMR		7.12216	7.15927	9.84959	9.90905
NAMIBIA	Namibia	NAM		1.13382	1.13756	1.07673	1.09575
NAURU	Nauru	NRU		0.013577	0.0144648	0.0158312	0.0162694
NEPAL	Nepal	NPL		3.66005	3.79736	3.80581	3.8682
NETHERLANDS	Netherlands	NLD		43.7146	42.2562	37.6227	38.4949
NEW CALEDONIA	New Caledonia	NCL		2.24046	2.30666	1.47014	1.50007
NEW ZEALAND	New Zealand	NZL		9.57433	9.97297	9.40414	9.22211
NICARAGUA	Nicaragua	NIC		1.46757	1.51436	1.24371	1.38094
NIGER	Niger	NER		0.571465	0.582772	0.679962	0.736599
NIGERIA	Nigeria	NGA		37.1393	38.2168	35.5286	37.3872
NIUE	Niue	NIU		0.00208877	0.00222535	0.00316625	0.00325387
NORWAY	Norway	NOR		11.959	11.5832	11.2434	11.1677
OCCUPIED PALESTINIAN TERRITORY	Palestine	PSE		0.878778	0.901534	0.823473	0.843949
OMAN	Oman	OMN		19.3859	19.5646	19.7888	22.1046
PAKISTAN	Pakistan	PAK		67.5288	67.9159	57.4192	62.6398
PALAU	Palau	PLW		0.0657963	0.0700986	0.063325	0.0650774
PANAMA	Panama	PAN		3.3014	3.41242	3.18132	3.55666
PAPUA NEW GUINEA	Papua New Guinea	PNG		1.85211	1.93418	2.27214	2.32248
PARAGUAY	Paraguay	PRY		2.21153	2.25772	2.19248	2.34077
PENINSULAR MALAYSIA	Peru	PER		14.7954	14.8835	12.961	15.3608
PERU	Philippines	PHL		37.916	39.373	37.0256	39.3733
PHILIPPINES	Bolivia	BOL		6.09866	6.16126	5.74989	6.36508
POLAND	Poland	POL		92.1686	88.0531	82.8393	89.6779
PORTUGAL	Portugal	PRT		14.0509	13.2636	11.4083	11.1346
QATAR	Qatar	QAT		29.8157	29.843	25.3441	26.11
REPUBLIC OF CAMEROON	Cameroon	CMR		2.06517	2.07226	2.45832	2.53747
REPUBLIC OF KOREA	South Korea	KOR		173.29	166.829	163.11	168.143
REPUBLIC OF MOLDOVA	Moldova	MDA		1.6042	1.62604	1.43294	1.5288
REPUBLIC OF SOUTH SUDAN	Sudan	SDN		0.420274	0.432556	0.409071	0.431785
REPUBLIC OF SUDAN	Sudan	SDN		6.106	6.27203	5.46821	5.74187
REUNION	Réunion	REU		0.0264378	0.0264378	1.1198	1.1198
ROMANIA	Romania	ROU		21.002	20.4924	20.2342	21.6503
RUSSIAN FEDERATION	Russian Federation	RUS		461.616	458.07	443.292	479.134
RWANDA	Rwanda	RWA		0.294787	0.303197	0.453569	0.478857
SAINT HELENA	Saint Helena	SHN		0.0030892	0.00300834	0.00341521	0.00376232
SAINT LUCIA	Saint Lucia	LCA		0.0988543	0.0962668	0.120386	0.132622
SAINT MARTIN (DUTCH PORTION)	Saint Martin	MAF		0.211095	0.20557	0.160515	0.176829
SAMOA	Samoa	WSM		0.073107	0.0778874	0.0781008	0.0802621
SAO TOME & PRINCIPE	Sao Tome and Principe	STP		0.0344232	0.0352451	0.0339515	0.0360203
SAUDI ARABIA	Saudi Arabia	SAU		157.412	158.884	180.457	183.51
SENEGAL	Senegal	SEN		2.64476	2.68087	3.47813	3.71122
SERBIA	Serbia	SRB		12.5691	14.9199	12.1586	8.42494
SEYCHELLES	Seychelles	SYC		0.165218	0.170046	0.146939	0.155098
SIERRA LEONE	Sierra Leone	SLE		0.26953	0.280312	0.332007	0.354641
SINGAPORE	Singapore	SGP		10.4498	10.629	8.16307	8.87197
SLOVAKIA	Slovakia	SVK		9.8493	9.09246	8.48655	9.63652
SLOVENIA	Slovenia	SVN		3.95411	3.73811	3.51153	3.42504
SOLOMON ISLANDS	Solomon Islands	SLB		0.0814621	0.0867888	0.0844333	0.0867699
SOMALIA	Somalia	SOM		0.179675	0.184925	0.157823	0.166587
SOUTH AFRICA	South Africa	ZAF		128.821	130.624	118.95	118.976
SPAIN	Spain	ESP		73.5956	68.9638	58.2259	63.769
SRI LANKA	Sri Lanka	LKA		6.26999	6.77979	5.92349	5.67165
ST. KITTS-NEVIS	Saint Piere and Miquelon	SPM		0.0679623	0.0661834	0.0589123	0.0649001
ST. PIERRE & MIQUELON	Saint Piere and Miquelon	SPM		0.0216244	0.0210584	0.0153684	0.0169305
ST. VINCENT & THE GRENADINES	Saint Vincent and the Grenadines	VCT		0.0720812	0.0701946	0.0529357	0.058316
SURINAME	Suriname	SUR		0.696457	0.711254	0.711691	0.762338
SWAZILAND	Swaziland	SWZ		0.269637	0.265788	0.28931	0.29673
SWEDEN	Sweden	SWE		11.3991	11.6721	9.96591	9.7841
SWITZERLAND	Switzerland	CHE		10.0697	10.2843	9.34524	9.53376
SYRIAN ARAB REPUBLIC	Syrian Arab Republic	SYR		7.06269	7.35827	7.13969	7.36921
TAIWAN	Taiwan	TWN		74.5373	71.681	72.1253	77.1987
TAJIKISTAN	Tajikistan	TJK		2.03965	2.45084	2.57479	2.82107
THAILAND	Thailand	THA		79.818	78.679	75.701	76.0087
TIMOR-LESTE (FORMERLY EAST TIMOR)	Timor-Leste	TLS		0.142036	0.151324	0.196144	0.200963
TOGO	Togo	TGO		0.864439	0.890129	0.612362	0.639198
TONGA	Tonga	TON		0.0449086	0.0478451	0.0464383	0.0477234
TRINIDAD AND TOBAGO	Trinidad and Tobago	TTO		10.3345	10.334	9.75879	9.85918
TUNISIA	Tunisia	TUN		8.28523	8.46423	7.52682	8.61975
TURKEY	Turkey	TUR		114.409	110.569	112.837	121.781
TURKMENISTAN	Turkmenistan	TKM		21.2977	23.3751	19.6605	22.6547
TURKS AND CAICOS ISLANDS	Turks	TCA		0.0648731	0.0631751	0.0845264	0.0931175
TUVALU	Tuvalu	TUV		0.00313316	0.00333803	0.00211083	0.00216925
UGANDA	Uganda	UGA		1.46964	1.50962	1.503	1.57764
UKRAINE	Ukraine	UKR		63.2353	60.9251	56.4796	55.0922
UNITED ARAB EMIRATES	United Arab Emirates	ARE		51.4578	52.0423	54.3353	55.7005
UNITED KINGDOM	United Kingdom	GBR		103.75	100.949	89.0456	94.6433
UNITED REPUBLIC OF TANZANIA	Tanzania	TZA		3.13916	3.17312	3.3554	3.5641
UNITED STATES OF AMERICA	USA	USA		1480.59	1442.33	1287.03	1366.63
URUGUAY	Uruguay	URY		1.70629	1.74075	1.71852	1.83894
UZBEKISTAN	Uzbekistan	UZB		31.0967	30.089	32.2707	33.1964
VANUATU	Vanuatu	VUT		0.0396867	0.0422817	0.0464383	0.0477234
VENEZUELA	Venezuela	VEN		35.3702	31.8471	20.8699	21.7649
VIET NAM	Vietnam	VNM		57.7986	67.6061	89.7652	88.9775
WALLIS AND FUTUNA ISLANDS	Wallis	WLF		0.0073107	0.00778874	0.00738792	0.00759236
YEMEN	Yemen	YEM		2.71433	2.79887	3.31335	3.40518
ZAMBIA	Zambia	ZMB		1.8914	1.83419	1.98708	2.09503
ZIMBABWE	Zimbabwe	ZWE		3.09514	2.83141	2.89517	3.083
		EU		#REF!	#REF!	#REF!	#REF!

## Sheet: GDP_WB
Series Name	Series Code	Country Name	Country Code	1990 [YR1990]	2000 [YR2000]	2012 [YR2012]	2013 [YR2013]	2014 [YR2014]	2015 [YR2015]	2016 [YR2016]	2017 [YR2017]	2018 [YR2018]	2019 [YR2019]	2020 [YR2020]	2021 [YR2021]
GDP (current US$)	NY.GDP.MKTP.CD	Afghanistan	AFG	NA	NA	1.99073e+10	2.01464e+10	2.04971e+10	1.91342e+10	1.81166e+10	1.87535e+10	1.80532e+10	1.87995e+10	2.01161e+10	NA
GDP (current US$)	NY.GDP.MKTP.CD	Albania	ALB	2028553750	3.48036e+09	1.23198e+10	1.27762e+10	1.32281e+10	1.13869e+10	1.18612e+10	1.30197e+10	1.51564e+10	1.54018e+10	1.51319e+10	1.826e+10
GDP (current US$)	NY.GDP.MKTP.CD	Algeria	DZA	6.20486e+10	5.47904e+10	2.09059e+11	2.09755e+11	2.1381e+11	1.65979e+11	1.60034e+11	1.70097e+11	1.74911e+11	1.71767e+11	1.45009e+11	1.67983e+11
GDP (current US$)	NY.GDP.MKTP.CD	American Samoa	ASM	NA	NA	640000000	638000000	643000000	673000000	671000000	612000000	639000000	648000000	709000000	NA
GDP (current US$)	NY.GDP.MKTP.CD	Andorra	AND	1.02905e+09	1.42905e+09	3.18865e+09	3.19351e+09	3.27169e+09	2.78988e+09	2.89661e+09	3.00016e+09	3.21842e+09	3.15515e+09	2.891e+09	3.32991e+09
GDP (current US$)	NY.GDP.MKTP.CD	Angola	AGO	1.12288e+10	9.12959e+09	1.24998e+11	1.33402e+11	1.37244e+11	8.72193e+10	4.98405e+10	6.89728e+10	7.77929e+10	6.93091e+10	5.36191e+10	7.2547e+10
GDP (current US$)	NY.GDP.MKTP.CD	Antigua and Barbuda	ATG	4.5947e+08	8.2637e+08	1.19995e+09	1.18145e+09	1.24973e+09	1.33669e+09	1.43659e+09	1.46798e+09	1.60594e+09	1.68753e+09	1.37028e+09	1.47113e+09
GDP (current US$)	NY.GDP.MKTP.CD	Argentina	ARG	1.41352e+11	284203750000	5.45982e+11	5.52025e+11	5.2632e+11	5.94749e+11	5.57531e+11	6.43629e+11	5.2482e+11	4.52818e+11	3.89591e+11	4.91493e+11
GDP (current US$)	NY.GDP.MKTP.CD	Armenia	ARM	2.25684e+09	1.91156e+09	1.06193e+10	1.11215e+10	1.16095e+10	1.05533e+10	1.05461e+10	1.15275e+10	1.24579e+10	1.36193e+10	1.26412e+10	1.38612e+10
GDP (current US$)	NY.GDP.MKTP.CD	Aruba	ABW	7.64804e+08	1.87318e+09	2.61508e+09	2.72793e+09	2.79106e+09	2.96313e+09	2.9838e+09	3.09218e+09	3.20223e+09	3.31006e+09	2.49665e+09	NA
GDP (current US$)	NY.GDP.MKTP.CD	Australia	AUS	3.11327e+11	4.15576e+11	1.54651e+12	1.57634e+12	1.4675e+12	1.35053e+12	1.20669e+12	1.32688e+12	1.42853e+12	1.39195e+12	1.32784e+12	1.54266e+12
GDP (current US$)	NY.GDP.MKTP.CD	Austria	AUT	1.66463e+11	1.9729e+11	4.09402e+11	4.30191e+11	4.42585e+11	3.81971e+11	3.95837e+11	4.17261e+11	4.55168e+11	4.45012e+11	4.33258e+11	4.77082e+11
GDP (current US$)	NY.GDP.MKTP.CD	Azerbaijan	AZE	8.85801e+09	5.2728e+09	6.96839e+10	7.41644e+10	7.52443e+10	5.30744e+10	3.78675e+10	4.08656e+10	4.71129e+10	4.81742e+10	42693000000	5.46222e+10
GDP (current US$)	NY.GDP.MKTP.CD	Bahamas, The	BHS	3166000000	8076470000	10720500000	10562800000	11176100000	11861900000	11834600000	12357600000	12755800000	13192800000	9699500000	11208600000
GDP (current US$)	NY.GDP.MKTP.CD	Bahrain	BHR	4.22979e+09	9.0629e+09	3.07493e+10	3.25395e+10	3.33877e+10	3.10506e+10	3.2235e+10	3.54738e+10	3.7802e+10	3.86533e+10	3.47234e+10	3.88687e+10
GDP (current US$)	NY.GDP.MKTP.CD	Bangladesh	BGD	3.15983e+10	5.33698e+10	1.33356e+11	1.4999e+11	1.72885e+11	1.95079e+11	2.65236e+11	2.93755e+11	3.21379e+11	3.51238e+11	3.73902e+11	4.16265e+11
GDP (current US$)	NY.GDP.MKTP.CD	Barbados	BRB	2.01213e+09	3059500000	4.6101e+09	4.67725e+09	4.69634e+09	4.72469e+09	4.83281e+09	4.98159e+09	5.09728e+09	5.30416e+09	4.68953e+09	4900800000
GDP (current US$)	NY.GDP.MKTP.CD	Belarus	BLR	21650000000	1.27369e+10	6.56851e+10	7.5528e+10	7.88138e+10	5.64547e+10	4.77227e+10	5.47266e+10	6.00313e+10	6.44096e+10	6.14896e+10	6.82188e+10
GDP (current US$)	NY.GDP.MKTP.CD	Belgium	BEL	2.05332e+11	2.36792e+11	4.96153e+11	5.21791e+11	5.3539e+11	4.62336e+11	4.76063e+11	5.02765e+11	5.43347e+11	5.35376e+11	5.21677e+11	5.99879e+11
GDP (current US$)	NY.GDP.MKTP.CD	Belize	BLZ	4.12086e+08	832072450	1.53135e+09	1.58184e+09	1.67641e+09	1.73432e+09	1.79693e+09	1.84491e+09	1.88747e+09	1.94525e+09	1.58563e+09	1.78992e+09
GDP (current US$)	NY.GDP.MKTP.CD	Benin	BEN	1.95997e+09	3.51999e+09	1.11414e+10	1.25178e+10	1.32845e+10	1.13882e+10	1.18211e+10	1.27017e+10	1.42624e+10	1.43917e+10	1.56515e+10	1.77856e+10
GDP (current US$)	NY.GDP.MKTP.CD	Bermuda	BMU	1592400000	3480219000	6378188000	6465756000	6413988000	6654541000	6899911000	7142316000	7225977000	7423465000	6881662000	7080900000
GDP (current US$)	NY.GDP.MKTP.CD	Bhutan	BTN	2.87658e+08	4.24464e+08	1.78128e+09	1.75622e+09	1.90709e+09	2.0036e+09	2.15897e+09	2.45036e+09	2.44687e+09	2.53566e+09	2.31544e+09	NA
GDP (current US$)	NY.GDP.MKTP.CD	Bolivia	BOL	4.86758e+09	8.39791e+09	2.70845e+10	3.06593e+10	3.29962e+10	3.30002e+10	3.39411e+10	3.75086e+10	4.02876e+10	4.08953e+10	3.66298e+10	4.04082e+10
GDP (current US$)	NY.GDP.MKTP.CD	Bosnia and Herzegovina	BIH	NA	5.56741e+09	1.72212e+10	1.81723e+10	1.85609e+10	1.62198e+10	1.69143e+10	1.80791e+10	2.01774e+10	2.02013e+10	1.99551e+10	2.25715e+10
GDP (current US$)	NY.GDP.MKTP.CD	Botswana	BWA	3.79057e+09	5.78833e+09	1.438e+10	1.49018e+10	1.56547e+10	1.35788e+10	1.50826e+10	1.60884e+10	1.69142e+10	1.66959e+10	1.49301e+10	1.76138e+10
GDP (current US$)	NY.GDP.MKTP.CD	Brazil	BRA	3.90726e+11	6.55448e+11	2.46523e+12	2.47282e+12	2.45604e+12	1.80221e+12	1.79569e+12	2.06351e+12	1.91693e+12	1.87329e+12	1.44857e+12	1.60898e+12
GDP (current US$)	NY.GDP.MKTP.CD	British Virgin Islands	VGB	NA	NA	NA	NA	NA	NA	NA	NA	NA	NA	NA	NA
GDP (current US$)	NY.GDP.MKTP.CD	Brunei Darussalam	BRN	3.52055e+09	6.00115e+09	1.90479e+10	1.80938e+10	1.70983e+10	1.29304e+10	1.14009e+10	1.21281e+10	1.35674e+10	1.34694e+10	1.20058e+10	1.40066e+10
GDP (current US$)	NY.GDP.MKTP.CD	Bulgaria	BGR	2.06321e+10	1.32458e+10	5.43009e+10	5.58101e+10	5.7082e+10	5.0782e+10	5.39539e+10	5.91994e+10	6.63634e+10	6.89154e+10	6.98893e+10	8.02711e+10
GDP (current US$)	NY.GDP.MKTP.CD	Burkina Faso	BFA	3.1013e+09	2.96837e+09	1.2561e+10	1.34443e+10	1.3943e+10	1.18322e+10	1.28334e+10	1.4107e+10	1.58901e+10	1.61782e+10	1.79336e+10	1.97376e+10
GDP (current US$)	NY.GDP.MKTP.CD	Burundi	BDI	1.1321e+09	8.70486e+08	2.33334e+09	2.45161e+09	2.70578e+09	3.104e+09	2.63932e+09	2.71232e+09	2.66012e+09	2.58127e+09	2.78051e+09	2.90203e+09
GDP (current US$)	NY.GDP.MKTP.CD	Cabo Verde	CPV	3.06891e+08	5.39227e+08	1.74181e+09	1.85047e+09	1.8599e+09	1.5968e+09	1.66301e+09	1.76979e+09	1.9665e+09	1.98185e+09	1.7037e+09	1.93617e+09
GDP (current US$)	NY.GDP.MKTP.CD	Cambodia	KHM	NA	3.65403e+09	1.40544e+10	1.5228e+10	1.67026e+10	1.805e+10	2.00167e+10	2.21772e+10	2.45718e+10	2.70894e+10	2.58728e+10	2.69611e+10
GDP (current US$)	NY.GDP.MKTP.CD	Cameroon	CMR	1.23145e+10	1.05666e+10	3.01551e+10	3.37286e+10	3.63865e+10	3.22102e+10	3.38143e+10	3.60986e+10	3.99738e+10	3.9671e+10	4.08044e+10	4.52386e+10
GDP (current US$)	NY.GDP.MKTP.CD	Canada	CAN	5.9393e+11	7.44773e+11	1.82837e+12	1.8466e+12	1.80575e+12	1.55651e+12	1.52799e+12	1.64927e+12	1.72533e+12	1.74202e+12	1.64542e+12	1.99076e+12
GDP (current US$)	NY.GDP.MKTP.CD	Cayman Islands	CYM	NA	NA	4.29116e+09	4.40595e+09	4.56302e+09	4.70834e+09	4.9095e+09	5.16647e+09	5.53038e+09	5.94359e+09	5.60899e+09	NA
GDP (current US$)	NY.GDP.MKTP.CD	Central African Republic	CAF	1.44071e+09	9.16777e+08	2.51013e+09	1.69154e+09	1.89481e+09	1.69583e+09	1.82502e+09	2.07235e+09	2.22098e+09	2.2213e+09	2.32672e+09	2.5165e+09
GDP (current US$)	NY.GDP.MKTP.CD	Chad	TCD	1.73861e+09	1.38851e+09	1.23674e+10	1.29535e+10	1.39408e+10	1.09504e+10	1.00978e+10	1.00004e+10	1.12392e+10	1.1315e+10	1.07154e+10	1.178e+10
GDP (current US$)	NY.GDP.MKTP.CD	Channel Islands	CHI	NA	6.4394e+09	NA	NA	NA	NA	NA	NA	NA	NA	NA	NA
GDP (current US$)	NY.GDP.MKTP.CD	Chile	CHL	3.31139e+10	7.82499e+10	2.67176e+11	2.77239e+11	2.59405e+11	2.42497e+11	2.49299e+11	2.76365e+11	2.95403e+11	2.78585e+11	2.52727e+11	3.17059e+11
GDP (current US$)	NY.GDP.MKTP.CD	China	CHN	3.60858e+11	1.21135e+12	8.53223e+12	9.57041e+12	1.04757e+13	1.10616e+13	1.12333e+13	1.23104e+13	1.38948e+13	1.42799e+13	1.46877e+13	1.77341e+13
GDP (current US$)	NY.GDP.MKTP.CD	Colombia	COL	4.78441e+10	9.98866e+10	3.70921e+11	3.82116e+11	3.81112e+11	2.93482e+11	2.82825e+11	3.11884e+11	3.34198e+11	3.2311e+11	2.703e+11	3.14322e+11
GDP (current US$)	NY.GDP.MKTP.CD	Comoros	COM	4.29622e+08	3.51137e+08	1.01584e+09	1.11622e+09	1.14959e+09	9.6603e+08	1.01284e+09	1.07744e+09	1.1888e+09	1.19502e+09	1.22388e+09	1.32796e+09
GDP (current US$)	NY.GDP.MKTP.CD	Congo, Dem. Rep.	COD	9.34976e+09	1.9088e+10	2.93062e+10	3.26797e+10	3.5909e+10	3.79177e+10	3.71348e+10	3.80193e+10	4.75682e+10	5.17758e+10	4.8717e+10	5.39586e+10
GDP (current US$)	NY.GDP.MKTP.CD	Congo, Rep.	COG	2.79875e+09	3.22793e+09	1.76929e+10	1.79587e+10	1.79129e+10	1.18903e+10	1.02193e+10	1.10948e+10	1.367e+10	1.27503e+10	1.04832e+10	1.2524e+10
GDP (current US$)	NY.GDP.MKTP.CD	Costa Rica	CRI	5.71169e+09	1.50136e+10	4.72317e+10	5.09497e+10	5.20164e+10	5.64419e+10	5.8847e+10	6.0516e+10	6.24202e+10	6.44177e+10	6.2158e+10	6.42824e+10
GDP (current US$)	NY.GDP.MKTP.CD	Cote d'Ivoire	CIV	1.07959e+10	1.65775e+10	3.63023e+10	4.27602e+10	4.8843e+10	4.58146e+10	4.79642e+10	5.15882e+10	5.80115e+10	5.85394e+10	6.13486e+10	6.97648e+10
GDP (current US$)	NY.GDP.MKTP.CD	Croatia	HRV	NA	2.18398e+10	5.71923e+10	5.88891e+10	5.83303e+10	5.01632e+10	5.22952e+10	5.62144e+10	6.22479e+10	6.22462e+10	5.72038e+10	6.78378e+10
GDP (current US$)	NY.GDP.MKTP.CD	Cuba	CUB	2.86454e+10	30565400000	73141000000	77148000000	80656000000	87133000000	91370000000	96851000000	100050000000	103428000000	107352000000	NA
GDP (current US$)	NY.GDP.MKTP.CD	Curacao	CUW	NA	NA	3.02453e+09	3.03994e+09	3.04844e+09	3.04274e+09	3.01475e+09	3.0095e+09	3.02039e+09	2.99519e+09	2.49617e+09	NA
GDP (current US$)	NY.GDP.MKTP.CD	Cyprus	CYP	5.59113e+09	9.98584e+09	2.49785e+10	2.39009e+10	2.31569e+10	1.98424e+10	2.09534e+10	2.28708e+10	2.55227e+10	2.57584e+10	2.46921e+10	2.77193e+10
GDP (current US$)	NY.GDP.MKTP.CD	Czechia	CZE	4.0729e+10	6.18282e+10	2.08858e+11	2.11686e+11	2.09359e+11	1.88033e+11	1.96272e+11	2.18629e+11	2.4895e+11	2.52498e+11	2.45339e+11	2.82341e+11
GDP (current US$)	NY.GDP.MKTP.CD	Denmark	DNK	1.38247e+11	1.64159e+11	3.27149e+11	3.43584e+11	3.52994e+11	3.02673e+11	3.13116e+11	3.32121e+11	3.56841e+11	3.47561e+11	3.56085e+11	3.97104e+11
GDP (current US$)	NY.GDP.MKTP.CD	Djibouti	DJI	4.52328e+08	5.51231e+08	1.35363e+09	2.04282e+09	2.21468e+09	2.42439e+09	2.60496e+09	2.76258e+09	2.91347e+09	3.08885e+09	3.18107e+09	3.3711e+09
GDP (current US$)	NY.GDP.MKTP.CD	Dominica	DMA	2.0143e+08	3.3347e+08	4.85996e+08	4.98296e+08	5.20207e+08	5.40737e+08	5.7623e+08	5.21552e+08	5.5477e+08	6.11537e+08	5.04215e+08	5.45619e+08
GDP (current US$)	NY.GDP.MKTP.CD	Dominican Republic	DOM	7.07368e+09	2.43057e+10	6.06815e+10	6.26822e+10	6.71799e+10	7.11648e+10	7.57047e+10	7.9998e+10	8.55554e+10	8.89413e+10	7.88447e+10	9.42435e+10
GDP (current US$)	NY.GDP.MKTP.CD	Ecuador	ECU	1.52393e+10	1.83278e+10	87924544000	95129659000	101726331000	99290381000	99937696000	104295862000	107562008000	108108009000	99291124000	106165866000
GDP (current US$)	NY.GDP.MKTP.CD	Egypt, Arab Rep.	EGY	4.29789e+10	9.98385e+10	2.79117e+11	2.88434e+11	3.05595e+11	3.29367e+11	3.32442e+11	2.35734e+11	2.49713e+11	3.03081e+11	3.65253e+11	4.04143e+11
GDP (current US$)	NY.GDP.MKTP.CD	El Salvador	SLV	4817542204	11784927700	21386150000	21990960000	22593470000	23438240000	24191430000	24979190000	26020850000	26896660000	24638720000	28736940000
GDP (current US$)	NY.GDP.MKTP.CD	Equatorial Guinea	GNQ	1.12119e+08	1.046e+09	2.23883e+10	2.19488e+10	2.17655e+10	1.31855e+10	1.12408e+10	1.22009e+10	1.3097e+10	1.13641e+10	1.00992e+10	1.22694e+10
GDP (current US$)	NY.GDP.MKTP.CD	Eritrea	ERI	NA	7.06371e+08	NA	NA	NA	NA	NA	NA	NA	NA	NA	NA
GDP (current US$)	NY.GDP.MKTP.CD	Estonia	EST	NA	5.68658e+09	2.30192e+10	2.51158e+10	2.66341e+10	2.28908e+10	2.40728e+10	2.69244e+10	3.04895e+10	3.10456e+10	3.06503e+10	3.62629e+10
GDP (current US$)	NY.GDP.MKTP.CD	Eswatini	SWZ	1.1147e+09	1.7381e+09	4.88653e+09	4.59753e+09	4.42297e+09	4.06325e+09	3.81602e+09	4.40297e+09	4.66678e+09	4.46607e+09	3.98484e+09	4.94137e+09
GDP (current US$)	NY.GDP.MKTP.CD	Ethiopia	ETH	1.21752e+10	8.24239e+09	4.33107e+10	4.76482e+10	5.56122e+10	6.45893e+10	7.42966e+10	8.17708e+10	8.42693e+10	9.59126e+10	1.07658e+11	1.11271e+11
GDP (current US$)	NY.GDP.MKTP.CD	Faroe Islands	FRO	NA	1.06828e+09	2.41438e+09	2.6773e+09	2.90113e+09	2.56182e+09	2.80486e+09	2.96988e+09	3.18007e+09	3.26884e+09	3.24076e+09	NA
GDP (current US$)	NY.GDP.MKTP.CD	Fiji	FJI	1.33702e+09	1.67824e+09	3.97201e+09	4.19014e+09	4.85696e+09	4.68255e+09	4.9302e+09	5.3534e+09	5.58137e+09	5.49626e+09	4.57441e+09	4.59212e+09
GDP (current US$)	NY.GDP.MKTP.CD	Finland	FIN	1.41438e+11	1.2602e+11	2.5829e+11	2.71362e+11	2.74863e+11	2.34534e+11	2.40771e+11	2.55648e+11	2.75715e+11	2.68508e+11	2.71837e+11	2.99155e+11
GDP (current US$)	NY.GDP.MKTP.CD	France	FRA	1.26918e+12	1.36564e+12	2.68367e+12	2.81188e+12	2.85596e+12	2.43919e+12	2.47296e+12	2.59515e+12	2.79096e+12	2.72887e+12	2.63032e+12	2.93747e+12
GDP (current US$)	NY.GDP.MKTP.CD	French Polynesia	PYF	3.18121e+09	3.45392e+09	NA	NA	NA	5.32585e+09	5.49704e+09	5.83335e+09	6.13512e+09	6.00806e+09	5.66937e+09	NA
GDP (current US$)	NY.GDP.MKTP.CD	Gabon	GAB	5.95229e+09	5.08048e+09	1.71705e+10	1.75957e+10	1.8204e+10	1.43831e+10	1.40239e+10	1.49295e+10	1.68673e+10	1.68744e+10	1.53168e+10	1.82694e+10
GDP (current US$)	NY.GDP.MKTP.CD	Gambia, The	GMB	3.17083e+08	7.82915e+08	1.41501e+09	1.37561e+09	1.22946e+09	1.37818e+09	1.48458e+09	1.50491e+09	1.67067e+09	1.81361e+09	1.83041e+09	2.07807e+09
GDP (current US$)	NY.GDP.MKTP.CD	Georgia	GEO	7.7535e+09	3.05748e+09	1.64884e+10	1.71896e+10	1.7627e+10	1.4954e+10	1.51418e+10	1.62429e+10	1.75969e+10	1.74704e+10	1.58429e+10	1.87002e+10
GDP (current US$)	NY.GDP.MKTP.CD	Germany	DEU	1.77167e+12	1.94798e+12	3.52714e+12	3.7338e+12	3.88909e+12	3.35759e+12	3.46985e+12	3.69085e+12	3.97729e+12	3.88833e+12	3.84641e+12	4.22312e+12	4.22312
GDP (current US$)	NY.GDP.MKTP.CD	Ghana	GHA	5.88917e+09	4.98302e+09	4.1271e+10	6.2823e+10	5.47828e+10	4.94066e+10	5.61652e+10	6.04064e+10	6.72993e+10	6.83375e+10	7.00432e+10	7.75943e+10
GDP (current US$)	NY.GDP.MKTP.CD	Gibraltar	GIB	NA	NA	NA	NA	NA	NA	NA	NA	NA	NA	NA	NA
GDP (current US$)	NY.GDP.MKTP.CD	Greece	GRC	9.78911e+10	1.30458e+11	2.42029e+11	2.38908e+11	2.35458e+11	1.95684e+11	1.93148e+11	1.99844e+11	2.12049e+11	2.05144e+11	1.88835e+11	2.16241e+11
GDP (current US$)	NY.GDP.MKTP.CD	Greenland	GRL	1.01897e+09	1.06803e+09	2.60967e+09	2.68495e+09	2.84205e+09	2.49912e+09	2.70715e+09	2.85161e+09	3.05579e+09	2.99433e+09	3.07597e+09	NA
GDP (current US$)	NY.GDP.MKTP.CD	Grenada	GRD	2.78099e+08	5.20044e+08	7.99882e+08	8.4262e+08	9.11497e+08	9.97008e+08	1.06164e+09	1.12569e+09	1.16652e+09	1.21349e+09	1.04341e+09	1.12208e+09
GDP (current US$)	NY.GDP.MKTP.CD	Guam	GUM	NA	NA	5265000000	5399000000	5610000000	5799000000	5901000000	6013000000	6060000000	6364000000	5844000000	NA
GDP (current US$)	NY.GDP.MKTP.CD	Guatemala	GTM	7.65013e+09	1.92888e+10	4.9594e+10	5.29965e+10	5.78524e+10	6.21862e+10	6.60537e+10	7.16541e+10	7.32086e+10	7.702e+10	7.76046e+10	8.59863e+10
GDP (current US$)	NY.GDP.MKTP.CD	Guinea	GIN	2.66675e+09	2.99536e+09	7.63805e+09	8.37661e+09	8.77847e+09	8.7942e+09	8.59596e+09	1.03247e+10	1.1857e+10	1.34429e+10	1.41696e+10	1.58505e+10
GDP (current US$)	NY.GDP.MKTP.CD	Guinea-Bissau	GNB	2.43962e+08	3.71096e+08	9.89271e+08	1.04609e+09	1.05492e+09	1.04823e+09	1.179e+09	1.35018e+09	1.50463e+09	1.43964e+09	1.43176e+09	1.63852e+09
GDP (current US$)	NY.GDP.MKTP.CD	Guyana	GUY	3.96582e+08	7.12668e+08	4.06309e+09	4.1678e+09	4.12766e+09	4.27984e+09	4.4827e+09	4.74817e+09	4.78764e+09	5.17376e+09	5.47126e+09	7.40918e+09
GDP (current US$)	NY.GDP.MKTP.CD	Haiti	HTI	3096289800	6.81358e+09	1.37089e+10	1.49025e+10	1.51393e+10	1.48332e+10	1.39877e+10	1.50356e+10	1.6455e+10	1.47858e+10	1.45082e+10	2.09444e+10
GDP (current US$)	NY.GDP.MKTP.CD	Honduras	HND	4.92301e+09	7.18665e+09	1.85286e+10	1.84997e+10	1.97565e+10	2.09798e+10	2.17176e+10	2.31362e+10	2.40678e+10	2.509e+10	2.38278e+10	2.84887e+10
GDP (current US$)	NY.GDP.MKTP.CD	Hong Kong SAR, China	HKG	7.69283e+10	1.71668e+11	2.62629e+11	2.75697e+11	2.91459e+11	3.09384e+11	3.20858e+11	3.41273e+11	3.61731e+11	3.63052e+11	3.44881e+11	3.68139e+11
GDP (current US$)	NY.GDP.MKTP.CD	Hungary	HUN	NA	4.72184e+10	1.28857e+11	1.35733e+11	1.41079e+11	1.2521e+11	1.28636e+11	1.43136e+11	1.60587e+11	1.63526e+11	1.56743e+11	1.82281e+11
GDP (current US$)	NY.GDP.MKTP.CD	Iceland	ISL	6.46874e+09	9.02566e+09	1.47515e+10	1.61251e+10	1.78677e+10	1.75172e+10	2.07932e+10	2.47283e+10	2.62671e+10	2.48577e+10	2.17181e+10	2.54589e+10
GDP (current US$)	NY.GDP.MKTP.CD	India	IND	3.20979e+11	4.68395e+11	1.82764e+12	1.85672e+12	2.03913e+12	2.10359e+12	2.2948e+12	2.65147e+12	2.70293e+12	2.83155e+12	2.66769e+12	3.1734e+12
GDP (current US$)	NY.GDP.MKTP.CD	Indonesia	IDN	1.06141e+11	1.65021e+11	9.1787e+11	9.12524e+11	8.90815e+11	8.60854e+11	9.31877e+11	1.01562e+12	1.04227e+12	1.1191e+12	1.05869e+12	1.18609e+12
GDP (current US$)	NY.GDP.MKTP.CD	Iran, Islamic Rep.	IRN	1.24813e+11	1.09592e+11	6.44036e+11	4.92776e+11	4.60383e+11	4.08213e+11	4.57955e+11	4.8663e+11	3.30992e+11	2.91363e+11	2.31548e+11	NA
GDP (current US$)	NY.GDP.MKTP.CD	Iraq	IRQ	1.80408e+11	4.83643e+10	2.18002e+11	2.34638e+11	2.28416e+11	1.66774e+11	1.66602e+11	1.87218e+11	2.27367e+11	2.33636e+11	1.8437e+11	2.07889e+11
GDP (current US$)	NY.GDP.MKTP.CD	Ireland	IRL	4.93056e+10	1.00208e+11	2.25497e+11	2.38279e+11	2.5897e+11	2.9158e+11	2.98928e+11	3.35431e+11	3.85042e+11	3.99122e+11	4.25889e+11	4.9856e+11
GDP (current US$)	NY.GDP.MKTP.CD	Isle of Man	IMN	NA	1.56367e+09	6.69073e+09	7.00075e+09	7.70883e+09	7.08529e+09	6.84669e+09	6.97958e+09	7.49197e+09	7.31539e+09	NA	NA
GDP (current US$)	NY.GDP.MKTP.CD	Israel	ISR	NA	1.32456e+11	2.58417e+11	2.94167e+11	3.10945e+11	3.00078e+11	3.19024e+11	3.55277e+11	3.73641e+11	3.97935e+11	4.07101e+11	4.81591e+11
GDP (current US$)	NY.GDP.MKTP.CD	Italy	ITA	1.18122e+12	1.14668e+12	2.08696e+12	2.14192e+12	2.16201e+12	1.83664e+12	1.87707e+12	1.9618e+12	2.09193e+12	2.01129e+12	1.89257e+12	2.09988e+12
GDP (current US$)	NY.GDP.MKTP.CD	Jamaica	JAM	4.59222e+09	9.00506e+09	1.48071e+10	1.42642e+10	1.38992e+10	1.41889e+10	1.40771e+10	1.4809e+10	1.57308e+10	1.58308e+10	1.38124e+10	1.36382e+10
GDP (current US$)	NY.GDP.MKTP.CD	Japan	JPN	3.13282e+12	4.96836e+12	6.27236e+12	5.21233e+12	4.89699e+12	4.44493e+12	5.00368e+12	4.93084e+12	5.03784e+12	5.12332e+12	5.04011e+12	4.93742e+12
GDP (current US$)	NY.GDP.MKTP.CD	Jordan	JOR	4.16e+09	8.46042e+09	3.16346e+10	3.44544e+10	3.68476e+10	3.8587e+10	3.98926e+10	4.1409e+10	4.29321e+10	4.45029e+10	4.36977e+10	4.52437e+10
GDP (current US$)	NY.GDP.MKTP.CD	Kazakhstan	KAZ	2.69327e+10	1.8292e+10	2.07999e+11	2.36635e+11	2.21416e+11	1.84388e+11	1.37278e+11	1.66806e+11	1.7934e+11	1.81667e+11	1.71082e+11	1.90814e+11
GDP (current US$)	NY.GDP.MKTP.CD	Kenya	KEN	8.57236e+09	1.27054e+10	5.63967e+10	6.16714e+10	6.82858e+10	7.01204e+10	7.48151e+10	8.20358e+10	9.2203e+10	1.0038e+11	1.00667e+11	1.10347e+11
GDP (current US$)	NY.GDP.MKTP.CD	Kiribati	KIR	3.98095e+07	6.72542e+07	1.8963e+08	1.84551e+08	1.77862e+08	1.70291e+08	1.7851e+08	1.88192e+08	1.96231e+08	1.77935e+08	1.80912e+08	NA
GDP (current US$)	NY.GDP.MKTP.CD	Korea, Dem. People's Rep.	PRK	NA	NA	NA	NA	NA	NA	NA	NA	NA	NA	NA	NA
GDP (current US$)	NY.GDP.MKTP.CD	Korea, Rep.	KOR	2.83368e+11	5.76178e+11	1.27843e+12	1.3708e+12	1.48432e+12	1.46577e+12	1.50011e+12	1.6239e+12	1.72485e+12	1.65142e+12	1.6379e+12	1.79853e+12
GDP (current US$)	NY.GDP.MKTP.CD	Kosovo	XKX	NA	NA	6.16379e+09	6.73573e+09	7.07466e+09	6.29582e+09	6.68283e+09	7.18081e+09	7.87851e+09	7.89988e+09	7.71693e+09	9.00716e+09
GDP (current US$)	NY.GDP.MKTP.CD	Kuwait	KWT	1.84278e+10	3.77128e+10	1.7407e+11	1.74161e+11	1.62631e+11	1.14567e+11	1.0942e+11	1.20707e+11	1.38182e+11	1.36197e+11	1.0596e+11	NA
GDP (current US$)	NY.GDP.MKTP.CD	Kyrgyz Republic	KGZ	2675000000	1.36969e+09	6.60514e+09	7.33503e+09	7.4681e+09	6.67818e+09	6.81309e+09	7.70293e+09	8.27111e+09	8.87103e+09	7.78087e+09	8.54342e+09
GDP (current US$)	NY.GDP.MKTP.CD	Lao PDR	LAO	8.6556e+08	1.7312e+09	1.01928e+10	1.19833e+10	1.32792e+10	1.44264e+10	1.59125e+10	1.70712e+10	1.81417e+10	1.87406e+10	1.89818e+10	1.88271e+10
GDP (current US$)	NY.GDP.MKTP.CD	Latvia	LVA	NA	7.95885e+09	2.81699e+10	3.02048e+10	3.13869e+10	2.72631e+10	2.80836e+10	3.04838e+10	3.4429e+10	3.43088e+10	3.36455e+10	3.88725e+10
GDP (current US$)	NY.GDP.MKTP.CD	Lebanon	LBN	2.83849e+09	1.72604e+10	4.40168e+10	4.68801e+10	4.80952e+10	4.99293e+10	5.11473e+10	5.30277e+10	5.49015e+10	5.1606e+10	2.59489e+10	1.80766e+10
GDP (current US$)	NY.GDP.MKTP.CD	Lesotho	LSO	5.96415e+08	8.87295e+08	2.4777e+09	2.36711e+09	2.44105e+09	2.35976e+09	2.11402e+09	2.30619e+09	2.51415e+09	2.45126e+09	2.25072e+09	2.51847e+09
GDP (current US$)	NY.GDP.MKTP.CD	Liberia	LBR	NA	874000000	2791614000	3177198100	3225652000	3227075700	3398419600	3390703400	3422754800	3319596500	3039982540	3486741370
GDP (current US$)	NY.GDP.MKTP.CD	Libya	LBY	2.89018e+10	3.82702e+10	9.2538e+10	7.53506e+10	5.73724e+10	4.87179e+10	4.9911e+10	6.71584e+10	7.66842e+10	6.92523e+10	5.23202e+10	4.18796e+10
GDP (current US$)	NY.GDP.MKTP.CD	Liechtenstein	LIE	1.42147e+09	2.48395e+09	5.45601e+09	6.39174e+09	6.65717e+09	6.26839e+09	6.23726e+09	6.47426e+09	6.6925e+09	6.42725e+09	NA	NA
GDP (current US$)	NY.GDP.MKTP.CD	Lithuania	LTU	NA	1.15248e+10	4.29275e+10	4.65234e+10	4.85337e+10	4.14355e+10	4.30473e+10	4.77587e+10	5.37509e+10	5.46974e+10	5.6547e+10	6.55038e+10
GDP (current US$)	NY.GDP.MKTP.CD	Luxembourg	LUX	1.27788e+10	2.12302e+10	5.97764e+10	6.52033e+10	6.88048e+10	6.00716e+10	6.22169e+10	6.57122e+10	7.1285e+10	7.01957e+10	7.33531e+10	8.67108e+10
GDP (current US$)	NY.GDP.MKTP.CD	Macao SAR, China	MAC	3.24648e+09	6.77419e+09	4.31895e+10	5.15363e+10	5.4903e+10	4.5048e+10	4.50706e+10	5.04409e+10	5.52844e+10	5.52048e+10	2.55861e+10	2.99052e+10
GDP (current US$)	NY.GDP.MKTP.CD	Madagascar	MDG	3.93133e+09	4.62925e+09	1.1579e+10	1.24236e+10	1.2523e+10	1.1323e+10	1.18486e+10	1.31763e+10	1.36144e+10	1.41919e+10	1.32256e+10	1.46374e+10
GDP (current US$)	NY.GDP.MKTP.CD	Malawi	MWI	1.88077e+09	1.74351e+09	6.02849e+09	5.51888e+09	6.04781e+09	6.37321e+09	5.43304e+09	8.94354e+09	9.88068e+09	1.10254e+10	1.21721e+10	1.26267e+10
GDP (current US$)	NY.GDP.MKTP.CD	Malaysia	MYS	4.40242e+10	9.37897e+10	3.14443e+11	3.23277e+11	3.38062e+11	3.01355e+11	3.01255e+11	3.19112e+11	3.58792e+11	3.65276e+11	3.37006e+11	3.72701e+11
GDP (current US$)	NY.GDP.MKTP.CD	Maldives	MDV	2.15044e+08	6.24337e+08	2.88617e+09	3.29501e+09	3.69735e+09	4.10942e+09	4.37914e+09	4.75418e+09	5.30096e+09	5.60776e+09	3.74277e+09	4.88967e+09
GDP (current US$)	NY.GDP.MKTP.CD	Mali	MLI	2.68191e+09	2.96148e+09	1.2442e+10	1.32427e+10	1.43649e+10	1.31048e+10	1.4026e+10	1.53657e+10	1.70709e+10	1.72803e+10	1.74654e+10	1.91437e+10
GDP (current US$)	NY.GDP.MKTP.CD	Malta	MLT	2.54716e+09	4.06952e+09	9.46224e+09	1.05517e+10	1.16263e+10	1.10914e+10	1.16683e+10	1.35051e+10	1.53013e+10	1.57195e+10	1.4917e+10	1.71897e+10
GDP (current US$)	NY.GDP.MKTP.CD	Marshall Islands	MHL	78476000	115347500	180436300	184840400	182142800	183814300	201510900	213204100	221588900	239462200	244462400	248665600
GDP (current US$)	NY.GDP.MKTP.CD	Mauritania	MRT	1.50691e+09	1.77952e+09	6.72821e+09	7.22307e+09	6.59254e+09	6.16686e+09	6.39875e+09	6.80014e+09	7.35253e+09	7.88966e+09	7.91599e+09	8.22758e+09
GDP (current US$)	NY.GDP.MKTP.CD	Mauritius	MUS	2.65348e+09	4.66331e+09	1.16687e+10	1.21296e+10	1.28034e+10	1.16923e+10	1.22325e+10	1.32594e+10	1.4182e+10	1.40458e+10	1.09268e+10	1.11567e+10
GDP (current US$)	NY.GDP.MKTP.CD	Mexico	MEX	2.61254e+11	7.07907e+11	1.20109e+12	1.27444e+12	1.31535e+12	1.17187e+12	1.07849e+12	1.15891e+12	1.22241e+12	1.2694e+12	1.08712e+12	1.29304e+12
GDP (current US$)	NY.GDP.MKTP.CD	Micronesia, Fed. Sts.	FSM	147200000	233271800	327248700	317214400	319271200	316489900	332265200	366666800	401932300	4.12479e+08	4.07516e+08	4.04178e+08
GDP (current US$)	NY.GDP.MKTP.CD	Moldova	MDA	NA	1.28843e+09	8.70914e+09	9.49672e+09	9.5102e+09	7.74524e+09	8.07147e+09	9.66974e+09	1.14574e+10	1.19713e+10	1.18597e+10	1.36792e+10
GDP (current US$)	NY.GDP.MKTP.CD	Monaco	MCO	2.48132e+09	2.64789e+09	5.74303e+09	6.55598e+09	7.06962e+09	6.26162e+09	6.47299e+09	6.43131e+09	7.19402e+09	7.38375e+09	6.81622e+09	NA
GDP (current US$)	NY.GDP.MKTP.CD	Mongolia	MNG	2560785660	1.1369e+09	1.22928e+10	1.25821e+10	1.22265e+10	1.16199e+10	1.11814e+10	1.14808e+10	1.31781e+10	1.42064e+10	1.3313e+10	1.5098e+10
GDP (current US$)	NY.GDP.MKTP.CD	Montenegro	MNE	NA	9.84298e+08	4.08773e+09	4.46577e+09	4.59385e+09	4.05473e+09	4.37693e+09	4.8566e+09	5.50694e+09	5.5422e+09	4.78072e+09	5.80917e+09
GDP (current US$)	NY.GDP.MKTP.CD	Morocco	MAR	3.01801e+10	3.88573e+10	9.82663e+10	1.06826e+11	1.10081e+11	1.0118e+11	1.03312e+11	1.09683e+11	1.18096e+11	1.1987e+11	1.14725e+11	1.32725e+11
GDP (current US$)	NY.GDP.MKTP.CD	Mozambique	MOZ	NA	5.65647e+09	1.63508e+10	1.69743e+10	1.77161e+10	1.5951e+10	1.1937e+10	1.32191e+10	1.48454e+10	1.539e+10	1.40288e+10	1.60958e+10
GDP (current US$)	NY.GDP.MKTP.CD	Myanmar	MMR	2.03637e+09	6.84932e+09	5.83187e+10	6.05723e+10	6.32649e+10	6.30453e+10	6.02917e+10	6.14494e+10	6.71447e+10	6.86978e+10	7.89303e+10	6.50678e+10
GDP (current US$)	NY.GDP.MKTP.CD	Namibia	NAM	2.78994e+09	3.92225e+09	1.3042e+10	1.20433e+10	1.24354e+10	1.13352e+10	1.0722e+10	1.28952e+10	1.36821e+10	1.25432e+10	1.05626e+10	1.22363e+10
GDP (current US$)	NY.GDP.MKTP.CD	Nauru	NRU	NA	NA	9.69272e+07	9.84918e+07	1.04654e+08	8.65297e+07	9.97234e+07	1.0936e+08	1.24021e+08	1.18724e+08	1.14627e+08	1.33219e+08
GDP (current US$)	NY.GDP.MKTP.CD	Nepal	NPL	3.62756e+09	5.49425e+09	2.17031e+10	2.21622e+10	2.27316e+10	2.43608e+10	2.45241e+10	2.89716e+10	3.31115e+10	3.41862e+10	3.34337e+10	3.62888e+10
GDP (current US$)	NY.GDP.MKTP.CD	Netherlands	NLD	3.18331e+11	4.17479e+11	8.38923e+11	8.77173e+11	8.92168e+11	7.65573e+11	7.8406e+11	8.3387e+11	9.14043e+11	9.10194e+11	9.13865e+11	1.01801e+12
GDP (current US$)	NY.GDP.MKTP.CD	New Caledonia	NCL	2.52944e+09	3.42003e+09	9.65915e+09	1.01514e+10	1.0635e+10	8.73821e+09	8.72457e+09	9.17367e+09	9.84692e+09	9.43813e+09	9.43553e+09	NA
GDP (current US$)	NY.GDP.MKTP.CD	New Zealand	NZL	4.54951e+10	5.26233e+10	1.76207e+11	1.90907e+11	2.01313e+11	1.78064e+11	1.88838e+11	2.06624e+11	2.11953e+11	2.13435e+11	2.11735e+11	2.49992e+11
GDP (current US$)	NY.GDP.MKTP.CD	Nicaragua	NIC	1.00946e+09	5.10733e+09	1.0532e+10	1.0983e+10	1.18804e+10	1.27567e+10	1.32861e+10	1.37859e+10	1.30252e+10	1.25966e+10	1.25869e+10	1.4013e+10
GDP (current US$)	NY.GDP.MKTP.CD	Niger	NER	3.51236e+09	2.24175e+09	9.42691e+09	1.02249e+10	1.08629e+10	9.68387e+09	1.03989e+10	1.11851e+10	1.28087e+10	1.29165e+10	1.37414e+10	1.49509e+10
GDP (current US$)	NY.GDP.MKTP.CD	Nigeria	NGA	5.40358e+10	6.94488e+10	4.55502e+11	5.08693e+11	5.46676e+11	4.86803e+11	4.0465e+11	3.75746e+11	3.9719e+11	4.4812e+11	4.32294e+11	4.40777e+11
GDP (current US$)	NY.GDP.MKTP.CD	North Macedonia	MKD	4.69965e+09	3.77286e+09	9.74525e+09	1.08177e+10	1.13623e+10	1.00645e+10	1.06725e+10	1.13071e+10	1.26831e+10	1.26063e+10	1.2117e+10	1.38793e+10
GDP (current US$)	NY.GDP.MKTP.CD	Northern Mariana Islands	MNP	NA	NA	746000000	772000000	832000000	910000000	1230000000	1560000000	1302000000	1182000000	NA	NA
GDP (current US$)	NY.GDP.MKTP.CD	Norway	NOR	1.19792e+11	1.71247e+11	5.09506e+11	5.22762e+11	4.9841e+11	3.85802e+11	3.68827e+11	3.98394e+11	4.37e+11	4.04941e+11	3.62198e+11	4.82437e+11
GDP (current US$)	NY.GDP.MKTP.CD	Oman	OMN	1.1685e+10	1.95075e+10	8.74088e+10	8.9936e+10	9.26991e+10	7.87108e+10	7.51287e+10	8.08567e+10	9.15059e+10	8.80609e+10	7.39714e+10	8.58686e+10
GDP (current US$)	NY.GDP.MKTP.CD	Pakistan	PAK	4.00104e+10	8.20177e+10	2.24384e+11	2.31219e+11	2.44361e+11	2.70556e+11	3.1363e+11	3.39206e+11	3.56128e+11	3.20909e+11	3.00306e+11	3.46343e+11
GDP (current US$)	NY.GDP.MKTP.CD	Palau	PLW	NA	146297500	212397800	221117200	241669800	280457700	298300000	285300000	284700000	274200000	257700000	NA
GDP (current US$)	NY.GDP.MKTP.CD	Panama	PAN	6433967000	12304115000	40429734400	45599994000	49921464400	54091713800	57907695400	62202725200	64929409200	6.69844e+10	53977037000	63605065800
GDP (current US$)	NY.GDP.MKTP.CD	Papua New Guinea	PNG	3.21973e+09	3.52134e+09	2.12957e+10	2.12614e+10	2.32107e+10	2.17235e+10	2.07591e+10	2.27426e+10	2.41095e+10	2.47513e+10	2.46671e+10	2.65943e+10
GDP (current US$)	NY.GDP.MKTP.CD	Paraguay	PRY	5.81211e+09	8.85571e+09	3.32964e+10	3.86513e+10	4.0378e+10	3.62114e+10	3.60896e+10	3.89971e+10	4.02254e+10	3.79253e+10	3.54322e+10	3.89868e+10
GDP (current US$)	NY.GDP.MKTP.CD	Peru	PER	2.64104e+10	5.17447e+10	1.92649e+11	2.01175e+11	2.00789e+11	1.89805e+11	1.91896e+11	2.11007e+11	2.22597e+11	2.28323e+11	2.01705e+11	2.23249e+11
GDP (current US$)	NY.GDP.MKTP.CD	Philippines	PHL	5.05083e+10	8.36697e+10	2.61921e+11	2.83903e+11	2.97483e+11	3.06446e+11	3.18627e+11	3.28481e+11	3.46842e+11	3.76823e+11	3.61751e+11	3.94086e+11
GDP (current US$)	NY.GDP.MKTP.CD	Poland	POL	6.59777e+10	1.72219e+11	4.98524e+11	5.21016e+11	5.42477e+11	4.77812e+11	4.7263e+11	5.26509e+11	5.87412e+11	5.97281e+11	5.96624e+11	6.74048e+11
GDP (current US$)	NY.GDP.MKTP.CD	Portugal	PRT	7.87139e+10	1.18605e+11	2.16224e+11	2.26434e+11	2.29902e+11	1.99394e+11	2.06426e+11	2.21358e+11	2.42313e+11	2.39987e+11	2.28539e+11	2.49886e+11
GDP (current US$)	NY.GDP.MKTP.CD	Puerto Rico	PRI	30603919000	61701800000	101564800000	102450000000	102445800000	103375500000	104336700000	103445526000	100925000000	104914600000	103138300000	NA
GDP (current US$)	NY.GDP.MKTP.CD	Qatar	QAT	7.36044e+09	1.77599e+10	1.86834e+11	1.98728e+11	2.06225e+11	1.6174e+11	1.51732e+11	1.61099e+11	1.83335e+11	1.75838e+11	1.44411e+11	1.79571e+11
GDP (current US$)	NY.GDP.MKTP.CD	Romania	ROU	3.89955e+10	3.72533e+10	1.70636e+11	1.90801e+11	1.99959e+11	1.77729e+11	1.88129e+11	2.11695e+11	2.41457e+11	2.49882e+11	2.49511e+11	2.84088e+11
GDP (current US$)	NY.GDP.MKTP.CD	Russian Federation	RUS	5.16814e+11	2.5971e+11	2.2083e+12	2.29247e+12	2.05924e+12	1.36348e+12	1.27679e+12	1.5742e+12	1.65733e+12	1.69311e+12	1.48832e+12	1.7758e+12
GDP (current US$)	NY.GDP.MKTP.CD	Rwanda	RWA	2.55019e+09	2.06758e+09	7.65067e+09	7.81598e+09	8.23476e+09	8.53942e+09	8.69088e+09	9.25283e+09	9.64244e+09	1.03563e+10	1.01843e+10	1.10704e+10
GDP (current US$)	NY.GDP.MKTP.CD	Samoa	WSM	1.25766e+08	2.58856e+08	7.6055e+08	7.7006e+08	7.56806e+08	7.88307e+08	7.99494e+08	8.32026e+08	8.21287e+08	8.52007e+08	8.07148e+08	7.8839e+08
GDP (current US$)	NY.GDP.MKTP.CD	San Marino	SMR	NA	1.00516e+09	1.60478e+09	1.67884e+09	1.67397e+09	1.41939e+09	1.46838e+09	1.52863e+09	1.6553e+09	1.61623e+09	1.54471e+09	NA
GDP (current US$)	NY.GDP.MKTP.CD	Sao Tome and Principe	STP	NA	NA	2.50681e+08	3.00554e+08	3.46528e+08	3.16066e+08	3.45496e+08	3.75614e+08	4.12254e+08	4.27425e+08	4.72914e+08	5.47093e+08
GDP (current US$)	NY.GDP.MKTP.CD	Saudi Arabia	SAU	1.1763e+11	1.89515e+11	7.35975e+11	7.46647e+11	7.5635e+11	6.5427e+11	6.44936e+11	6.88586e+11	8.16579e+11	8.03616e+11	7.03368e+11	8.33541e+11
GDP (current US$)	NY.GDP.MKTP.CD	Senegal	SEN	7.39097e+09	6.01318e+09	1.76609e+10	1.89187e+10	1.97973e+10	1.77748e+10	1.90403e+10	2.09966e+10	2.31169e+10	2.33988e+10	2.44932e+10	2.76254e+10
GDP (current US$)	NY.GDP.MKTP.CD	Serbia	SRB	NA	6.87585e+09	4.33093e+10	4.83942e+10	4.70622e+10	3.9656e+10	4.06926e+10	4.41791e+10	5.06407e+10	5.15142e+10	5.3335e+10	6.30681e+10
GDP (current US$)	NY.GDP.MKTP.CD	Seychelles	SYC	3.68585e+08	6.1488e+08	1.0595e+09	1.32809e+09	1.38758e+09	1.416e+09	1.49023e+09	1.57343e+09	1.63631e+09	1.68423e+09	1.20063e+09	1.32005e+09
GDP (current US$)	NY.GDP.MKTP.CD	Sierra Leone	SLE	6.49645e+08	6.35874e+08	3.80186e+09	4.92034e+09	5.01516e+09	4.21872e+09	3.67479e+09	3.71937e+09	4.08511e+09	4.07658e+09	4.06329e+09	4.20038e+09
GDP (current US$)	NY.GDP.MKTP.CD	Singapore	SGP	3.61443e+10	9.60745e+10	2.95087e+11	3.07576e+11	3.14851e+11	3.08004e+11	3.18832e+11	3.43193e+11	3.76998e+11	3.75473e+11	3.45296e+11	3.96987e+11
GDP (current US$)	NY.GDP.MKTP.CD	Sint Maarten (Dutch part)	SXM	NA	NA	9.85866e+08	1.02291e+09	1.24525e+09	1.25307e+09	1.26369e+09	1.19162e+09	1.18547e+09	NA	NA	NA
GDP (current US$)	NY.GDP.MKTP.CD	Slovak Republic	SVK	1.27474e+10	2.92426e+10	9.42532e+10	9.85693e+10	1.01089e+11	8.86369e+10	8.96749e+10	9.53935e+10	1.05613e+11	1.05284e+11	1.05173e+11	1.14871e+11
GDP (current US$)	NY.GDP.MKTP.CD	Slovenia	SVN	NA	2.02896e+10	4.65778e+10	4.84157e+10	4.99972e+10	4.31075e+10	4.47667e+10	4.85891e+10	5.41636e+10	5.41789e+10	5.35896e+10	6.15263e+10
GDP (current US$)	NY.GDP.MKTP.CD	Solomon Islands	SLB	2.14878e+08	4.19845e+08	1.19105e+09	1.28476e+09	1.33558e+09	1.30708e+09	1.37854e+09	1.48379e+09	1.57462e+09	1.57009e+09	1.54589e+09	1.64521e+09
GDP (current US$)	NY.GDP.MKTP.CD	Somalia	SOM	9.17044e+08	NA	NA	4.5745e+09	5.02196e+09	5.33176e+09	5.52987e+09	5609000000	5.85068e+09	6.47667e+09	6.96529e+09	7.29272e+09
GDP (current US$)	NY.GDP.MKTP.CD	South Africa	ZAF	1.26048e+11	1.51753e+11	4.34401e+11	4.00886e+11	3.81199e+11	3.4671e+11	3.23586e+11	3.81449e+11	4.04842e+11	3.87935e+11	3.35442e+11	4.19946e+11
GDP (current US$)	NY.GDP.MKTP.CD	South Sudan	SSD	NA	NA	1.19315e+10	1.84265e+10	1.39622e+10	1.19978e+10	NA	NA	NA	NA	NA	NA
GDP (current US$)	NY.GDP.MKTP.CD	Spain	ESP	5.36559e+11	5.98363e+11	1.32474e+12	1.35514e+12	1.37122e+12	1.1956e+12	1.23291e+12	1.31254e+12	1.42099e+12	1.39305e+12	1.28148e+12	1.42528e+12
GDP (current US$)	NY.GDP.MKTP.CD	Sri Lanka	LKA	8.03255e+09	1.63308e+10	6.84344e+10	7.43178e+10	7.93564e+10	8.06041e+10	8.2401e+10	8.74281e+10	8.7963e+10	8.39026e+10	8.09697e+10	8.45188e+10
GDP (current US$)	NY.GDP.MKTP.CD	St. Kitts and Nevis	KNA	2.17259e+08	4.21696e+08	8.26232e+08	8.75376e+08	9.54062e+08	9.58407e+08	1.00894e+09	1.06064e+09	1.07851e+09	1.16488e+09	9.80906e+08	9.76151e+08
GDP (current US$)	NY.GDP.MKTP.CD	St. Lucia	LCA	5.7963e+08	9.32593e+08	1.60515e+09	1.66482e+09	1.75513e+09	1.80808e+09	1.86551e+09	1.99677e+09	2.06513e+09	2.11879e+09	1.61677e+09	1.7649e+09
GDP (current US$)	NY.GDP.MKTP.CD	St. Martin (French part)	MAF	NA	NA	NA	NA	7.72922e+08	NA	NA	NA	NA	NA	NA	NA
GDP (current US$)	NY.GDP.MKTP.CD	St. Vincent and the Grenadines	VCT	2.40367e+08	4.27946e+08	7.30033e+08	7.64781e+08	7.70901e+08	7.86555e+08	8.14302e+08	8.4762e+08	8.84328e+08	9.1015e+08	8.72135e+08	8.89775e+08
GDP (current US$)	NY.GDP.MKTP.CD	Sudan	SDN	3.36412e+10	1.22574e+10	6.31955e+10	6.60266e+10	7.68183e+10	8.49851e+10	1.02944e+11	1.29718e+11	3.23338e+10	3.23381e+10	2.69876e+10	3.43261e+10
GDP (current US$)	NY.GDP.MKTP.CD	Suriname	SUR	388400000	9.47672e+08	4980000000	5.14576e+09	5.24061e+09	5.12629e+09	3.31744e+09	3.59162e+09	3.99625e+09	3.98448e+09	2.88425e+09	2.86213e+09
GDP (current US$)	NY.GDP.MKTP.CD	Sweden	SWE	2.61846e+11	2.62835e+11	5.52484e+11	5.86842e+11	5.81964e+11	5.05104e+11	5.15655e+11	5.41019e+11	5.55455e+11	5.3388e+11	5.41487e+11	6.27438e+11
GDP (current US$)	NY.GDP.MKTP.CD	Switzerland	CHE	2.65987e+11	2.79841e+11	6.9211e+11	7.12748e+11	7.34397e+11	7.0215e+11	6.95601e+11	7.04479e+11	7.35539e+11	7.31767e+11	7.52248e+11	8.12867e+11
GDP (current US$)	NY.GDP.MKTP.CD	Syrian Arab Republic	SYR	2.39045e+10	8.059e+10	4.41178e+10	2.25525e+10	2.2076e+10	1.76221e+10	1.24535e+10	1.63407e+10	2.14458e+10	NA	NA	NA
GDP (current US$)	NY.GDP.MKTP.CD	Tajikistan	TJK	2.63177e+09	8.60521e+08	7.63305e+09	8.44847e+09	9.11254e+09	8.27145e+09	6.99239e+09	7.53644e+09	7.76501e+09	8.30078e+09	8.134e+09	8.74627e+09
GDP (current US$)	NY.GDP.MKTP.CD	Tanzania	TZA	4.25874e+09	1.3376e+10	3.96505e+10	4.56805e+10	4.99648e+10	4.73786e+10	4.9774e+10	5.33206e+10	5.70037e+10	6.11369e+10	6.24097e+10	6.77751e+10
GDP (current US$)	NY.GDP.MKTP.CD	Thailand	THA	8.53431e+10	1.26392e+11	3.97558e+11	4.20333e+11	4.07339e+11	4.01296e+11	4.13366e+11	4.56357e+11	5.06755e+11	5.44081e+11	4.99682e+11	5.05982e+11
GDP (current US$)	NY.GDP.MKTP.CD	Timor-Leste	TLS	NA	367087900	1160389500	1395519600	1447307100	1594410900	1650618500	1615609700	1583876200	2047931700	1902156800	1.95913e+09
GDP (current US$)	NY.GDP.MKTP.CD	Togo	TGO	1.62843e+09	1.49189e+09	3.87331e+09	4.32166e+09	4.57499e+09	4.18087e+09	6.03163e+09	6.39547e+09	7.1122e+09	7.2204e+09	7.57464e+09	8.4132e+09
GDP (current US$)	NY.GDP.MKTP.CD	Tonga	TON	1.13564e+08	2.0485e+08	4.70714e+08	4.50644e+08	4.39879e+08	4.37006e+08	4.2054e+08	4.60379e+08	4.89236e+08	5.1235e+08	4.8883e+08	NA
GDP (current US$)	NY.GDP.MKTP.CD	Trinidad and Tobago	TTO	5068000000	8.15434e+09	2.57817e+10	2.72945e+10	2.76425e+10	2.51916e+10	2.23736e+10	2.31801e+10	2.38207e+10	2.38862e+10	2.13925e+10	2.13918e+10
GDP (current US$)	NY.GDP.MKTP.CD	Tunisia	TUN	1.22906e+10	2.14733e+10	4.73112e+10	4.86842e+10	5.02711e+10	4.57801e+10	4.43606e+10	4.2164e+10	4.2686e+10	4.17729e+10	4.25142e+10	4.684e+10
GDP (current US$)	NY.GDP.MKTP.CD	Turkiye	TUR	1.50676e+11	2.74303e+11	8.80556e+11	9.57783e+11	9.38953e+11	8.64317e+11	8.69693e+11	8.58996e+11	7.78472e+11	7.61004e+11	7.19955e+11	8.15272e+11
GDP (current US$)	NY.GDP.MKTP.CD	Turkmenistan	TKM	3.1881e+09	2.90466e+09	3.51642e+10	3.91975e+10	4.35242e+10	3.57997e+10	3.61694e+10	3.79263e+10	4.07654e+10	4.52314e+10	NA	NA
GDP (current US$)	NY.GDP.MKTP.CD	Turks and Caicos Islands	TCA	NA	NA	727161000	754238000	841070000	942070000	1032452000	1022365000	1113178000	1197415000	924583000	943269768
GDP (current US$)	NY.GDP.MKTP.CD	Tuvalu	TUV	8.82445e+06	1.50742e+07	3.93456e+07	3.86175e+07	3.87597e+07	3.68117e+07	4.16295e+07	4.52177e+07	4.78183e+07	5.42231e+07	5.50547e+07	6.3101e+07
GDP (current US$)	NY.GDP.MKTP.CD	Uganda	UGA	4.3044e+09	6.19325e+09	2.73059e+10	2.89158e+10	3.26124e+10	3.23872e+10	2.9204e+10	3.07445e+10	3.2927e+10	3.53531e+10	3.76004e+10	4.04347e+10
GDP (current US$)	NY.GDP.MKTP.CD	Ukraine	UKR	8.13936e+10	3.23753e+10	1.82592e+11	1.90499e+11	1.33503e+11	9.1031e+10	9.3356e+10	1.12091e+11	1.30891e+11	1.53883e+11	1.56618e+11	2.00086e+11
GDP (current US$)	NY.GDP.MKTP.CD	United Arab Emirates	ARE	5.07014e+10	1.04337e+11	3.74591e+11	3.90108e+11	4.03137e+11	3.58135e+11	3.57045e+11	3.85606e+11	4.22215e+11	4.17216e+11	3.58869e+11	NA
GDP (current US$)	NY.GDP.MKTP.CD	United Kingdom	GBR	1.09317e+12	1.66213e+12	2.71916e+12	2.80329e+12	3.08717e+12	2.95657e+12	2.72285e+12	2.69902e+12	2.90079e+12	2.87867e+12	2.7569e+12	3.18686e+12
GDP (current US$)	NY.GDP.MKTP.CD	United States	USA	5963144000000	10250947997000	16253972230000	16843190993000	17550680174000	18206020741000	18695110842000	19479620056000	20527156026000	21372572437000	20893743833000	22996100000000
GDP (current US$)	NY.GDP.MKTP.CD	Uruguay	URY	9.29884e+09	2.28233e+10	5.12644e+10	5.75312e+10	5.7236e+10	5.32743e+10	5.72367e+10	6.4234e+10	6.4515e+10	6.12311e+10	5.35608e+10	5.93195e+10
GDP (current US$)	NY.GDP.MKTP.CD	Uzbekistan	UZB	1.33606e+10	1.37605e+10	6.75173e+10	7.318e+10	8.08454e+10	8.61963e+10	8.61383e+10	6.20813e+10	5.26331e+10	5.99077e+10	5.98943e+10	6.92389e+10
GDP (current US$)	NY.GDP.MKTP.CD	Vanuatu	VUT	1.68879e+08	2.72015e+08	7.4784e+08	7.58304e+08	7.72316e+08	7.30871e+08	7.8089e+08	8.80062e+08	9.14737e+08	9.36526e+08	8.96828e+08	9.83469e+08
GDP (current US$)	NY.GDP.MKTP.CD	Venezuela, RB	VEN	4.85983e+10	1.17141e+11	3.81286e+11	3.71005e+11	4.82359e+11	NA	NA	NA	NA	NA	NA	NA
GDP (current US$)	NY.GDP.MKTP.CD	Vietnam	VNM	6.47174e+09	3.11725e+10	1.95592e+11	2.13711e+11	2.3345e+11	2.39257e+11	2.57096e+11	2.81353e+11	3.08702e+11	3.30391e+11	3.43243e+11	3.62638e+11
GDP (current US$)	NY.GDP.MKTP.CD	Virgin Islands (U.S.)	VIR	NA	NA	4089000000	3738000000	3565000000	3663000000	3798000000	3794000000	3922000000	4117000000	4204000000	NA
GDP (current US$)	NY.GDP.MKTP.CD	West Bank and Gaza	PSE	NA	4313600000	12208400000	13515500000	13989700000	13972400000	15405400000	16128000000	16276600000	17133500000	15531700000	18036800000
GDP (current US$)	NY.GDP.MKTP.CD	Yemen, Rep.	YEM	5.64712e+09	9.65244e+09	3.54013e+10	4.04152e+10	4.32286e+10	4.24445e+10	3.13178e+10	2.68422e+10	2.16062e+10	2.18876e+10	1.88405e+10	2.10617e+10
GDP (current US$)	NY.GDP.MKTP.CD	Zambia	ZMB	3.28522e+09	3.60068e+09	2.55031e+10	2.80372e+10	2.7141e+10	2.12512e+10	2.09584e+10	2.58736e+10	2.63116e+10	2.33087e+10	1.81106e+10	2.12031e+10
GDP (current US$)	NY.GDP.MKTP.CD	Zimbabwe	ZWE	8783816700	6689957600	1.71148e+10	19091020000	19495519600	19963120600	20548678100	1.75849e+10	1.81155e+10	1.92843e+10	1.80512e+10	2.62177e+10
GDP (current US$)	NY.GDP.MKTP.CD	Africa Eastern and Southern	AFE	2.53224e+11	2.83925e+11	9.73043e+11	9.83937e+11	1.00368e+12	9.24253e+11	8.82355e+11	1.02065e+12	9.91022e+11	9.97534e+11	9.21646e+11	1.0821e+12
GDP (current US$)	NY.GDP.MKTP.CD	Africa Western and Central	AFW	1.21802e+11	1.4041e+11	7.2757e+11	8.20793e+11	8.6499e+11	7.60734e+11	6.90546e+11	6.83749e+11	7.4169e+11	7.94543e+11	7.84446e+11	8.35808e+11
GDP (current US$)	NY.GDP.MKTP.CD	Arab World	ARB	6.44069e+11	8.16022e+11	2.77808e+12	2.83461e+12	2.87601e+12	2.5187e+12	2.49586e+12	2.5841e+12	2.78588e+12	2.8081e+12	2.49625e+12	2.85042e+12
GDP (current US$)	NY.GDP.MKTP.CD	Caribbean small states	CSS	1.80117e+10	3.42499e+10	7.21411e+10	7.35214e+10	7.46204e+10	7.3535e+10	6.94784e+10	7.25332e+10	7.54312e+10	7.70238e+10	6.59229e+10	6.99703e+10
GDP (current US$)	NY.GDP.MKTP.CD	Central Europe and the Baltics	CEB	2.56336e+11	4.28307e+11	1.35332e+12	1.42276e+12	1.46593e+12	1.29306e+12	1.32156e+12	1.46453e+12	1.64546e+12	1.67386e+12	1.65492e+12	1.8879e+12
GDP (current US$)	NY.GDP.MKTP.CD	Early-demographic dividend	EAR	1.85679e+12	3.38251e+12	1.01535e+13	1.02956e+13	1.06483e+13	1.0129e+13	1.04544e+13	1.12913e+13	1.14011e+13	1.16438e+13	1.08417e+13	1.26181e+13
GDP (current US$)	NY.GDP.MKTP.CD	East Asia & Pacific	EAS	4.73713e+12	8.37314e+12	2.11712e+13	2.14098e+13	2.20853e+13	2.19971e+13	2.27721e+13	2.43252e+13	2.6481e+13	2.70241e+13	2.71187e+13	3.08808e+13
GDP (current US$)	NY.GDP.MKTP.CD	East Asia & Pacific (excluding high income)	EAP	6.67364e+11	1.73467e+12	1.07592e+13	1.18711e+13	1.27988e+13	1.33276e+13	1.36124e+13	1.48773e+13	1.6639e+13	1.72039e+13	1.74838e+13	2.07466e+13
GDP (current US$)	NY.GDP.MKTP.CD	East Asia & Pacific (IDA & IBRD countries)	TEA	6.66363e+11	1.73207e+12	1.07451e+13	1.18557e+13	1.27822e+13	1.33102e+13	1.35948e+13	1.48581e+13	1.66176e+13	1.71818e+13	1.74613e+13	2.07198e+13
GDP (current US$)	NY.GDP.MKTP.CD	Euro area	EMU	5.88069e+12	6.4955e+12	1.26382e+13	1.31954e+13	1.35089e+13	1.16744e+13	1.19725e+13	1.26777e+13	1.36994e+13	1.34161e+13	1.30273e+13	1.44932e+13
GDP (current US$)	NY.GDP.MKTP.CD	Europe & Central Asia	ECS	8.86089e+12	1.00626e+13	2.24623e+13	2.34812e+13	2.38119e+13	2.05133e+13	2.04537e+13	2.16802e+13	2.32241e+13	2.29416e+13	2.21339e+13	2.50469e+13
GDP (current US$)	NY.GDP.MKTP.CD	Europe & Central Asia (excluding high income)	ECA	8.93026e+11	6.62874e+11	3.9147e+12	4.15022e+12	3.84583e+12	2.9214e+12	2.77773e+12	3.11819e+12	3.18253e+12	3.24971e+12	2.98073e+12	3.49915e+12
GDP (current US$)	NY.GDP.MKTP.CD	Europe & Central Asia (IDA & IBRD countries)	TEC	1.02012e+12	8.94261e+11	4.64105e+12	4.92093e+12	4.6466e+12	3.62711e+12	3.49079e+12	3.91261e+12	4.07365e+12	4.15911e+12	3.88483e+12	4.52564e+12
GDP (current US$)	NY.GDP.MKTP.CD	European Union	EUU	6.49847e+12	7.2761e+12	1.46362e+13	1.52997e+13	1.56521e+13	1.35519e+13	1.38932e+13	1.47663e+13	1.59787e+13	1.56919e+13	1.53001e+13	1.70886e+13
GDP (current US$)	NY.GDP.MKTP.CD	Fragile and conflict affected situations	FCS	5.51558e+11	5.25987e+11	1.87776e+12	1.9466e+12	2.04952e+12	1.65152e+12	1.55469e+12	1.64476e+12	1.68088e+12	1.79141e+12	1.67531e+12	1.79531e+12
GDP (current US$)	NY.GDP.MKTP.CD	Heavily indebted poor countries (HIPC)	HPC	1.61312e+11	1.76449e+11	6.04867e+11	6.73157e+11	7.15229e+11	6.93547e+11	7.28869e+11	8.08758e+11	7.70227e+11	7.97618e+11	8.03284e+11	8.94494e+11
GDP (current US$)	NY.GDP.MKTP.CD	High income	HIC	1.89793e+13	2.77544e+13	4.94261e+13	5.00479e+13	5.1126e+13	4.82584e+13	4.92986e+13	5.15585e+13	5.48156e+13	5.52892e+13	5.36998e+13	5.94454e+13
GDP (current US$)	NY.GDP.MKTP.CD	IBRD only	IBD	3.57197e+12	5.85102e+12	2.52817e+13	2.66873e+13	2.75859e+13	2.58384e+13	2.60494e+13	2.87557e+13	3.05803e+13	3.12442e+13	3.00324e+13	3.54515e+13
GDP (current US$)	NY.GDP.MKTP.CD	IDA & IBRD total	IBT	3.94151e+12	6.38635e+12	27074329762050	2.86334e+13	2.96692e+13	2.78906e+13	2.81482e+13	3.09492e+13	3.28167e+13	3.35817e+13	3.23649e+13	3.79979e+13
GDP (current US$)	NY.GDP.MKTP.CD	IDA blend	IDB	1.46299e+11	2.06737e+11	9.00553e+11	9.78009e+11	1.0493e+12	1.01147e+12	9.77136e+11	9.59821e+11	1.00783e+12	1.04015e+12	9.99384e+11	1.09009e+12
GDP (current US$)	NY.GDP.MKTP.CD	IDA only	IDX	2.2349e+11	3.29981e+11	8.91921e+11	9.6811e+11	1.034e+12	1.03958e+12	1.12026e+12	1.23322e+12	1.22894e+12	1.29734e+12	1.33364e+12	1.4555e+12
GDP (current US$)	NY.GDP.MKTP.CD	IDA total	IDA	3.69392e+11	5.35747e+11	1.79247e+12	1.94612e+12	2.0833e+12	2.05105e+12	2.0974e+12	2.19304e+12	2.23677e+12	2.33749e+12	2.33233e+12	2.54482e+12
GDP (current US$)	NY.GDP.MKTP.CD	Late-demographic dividend	LTE	1.96068e+12	3.40335e+12	1.76496e+13	1.90203e+13	1.97483e+13	1.85177e+13	1.85708e+13	2.06096e+13	2.2593e+13	2.30264e+13	2.24709e+13	2.65943e+13
GDP (current US$)	NY.GDP.MKTP.CD	Latin America & Caribbean	LCN	1.10768e+12	2.29234e+12	6.15058e+12	6.30226e+12	6.42593e+12	5.36984e+12	5.24793e+12	5.83076e+12	5.70184e+12	5.62361e+12	4.74315e+12	5.48872e+12
GDP (current US$)	NY.GDP.MKTP.CD	Latin America & Caribbean (excluding high income)	LAC	9.63521e+11	1.96855e+12	5.24798e+12	5.3861e+12	5.41069e+12	4.59901e+12	4.46955e+12	4.98519e+12	4.84091e+12	4.77884e+12	3.99794e+12	4.60707e+12
GDP (current US$)	NY.GDP.MKTP.CD	Latin America & the Caribbean (IDA & IBRD countries)	TLA	1.03807e+12	2.1779e+12	5.94281e+12	6.08968e+12	6.2088e+12	5.14157e+12	5.0135e+12	5.59126e+12	5.46018e+12	5.37262e+12	4.49522e+12	5.20251e+12
GDP (current US$)	NY.GDP.MKTP.CD	Least developed countries: UN classification	LDC	1.82239e+11	2.17431e+11	8.37472e+11	9.12825e+11	9.81404e+11	9.49727e+11	9.88285e+11	1.10387e+12	1.08762e+12	1.1423e+12	1.162e+12	1.27291e+12
GDP (current US$)	NY.GDP.MKTP.CD	Low & middle income	LMY	3.75094e+12	5.95346e+12	2.56804e+13	2.71883e+13	2.81005e+13	2.66613e+13	2.6903e+13	2.95646e+13	3.12993e+13	3.20613e+13	3.09139e+13	3.63159e+13
GDP (current US$)	NY.GDP.MKTP.CD	Low income	LIC	1.37462e+11	1.91365e+11	4.37977e+11	4.49879e+11	4.8029e+11	4.74998e+11	4.70793e+11	5.27247e+11	4.53568e+11	4.79643e+11	4.81025e+11	5.26278e+11
GDP (current US$)	NY.GDP.MKTP.CD	Lower middle income	LMC	1.04787e+12	1.52035e+12	6.32915e+12	6.43275e+12	6.68283e+12	6.52599e+12	6.88532e+12	7.39639e+12	7.54106e+12	7.89476e+12	7.58555e+12	8.68329e+12
GDP (current US$)	NY.GDP.MKTP.CD	Middle East & North Africa	MEA	8.00911e+11	1.04643e+12	3.61457e+12	3.55316e+12	3.56938e+12	3.14063e+12	3.16863e+12	3.2963e+12	3.45909e+12	3.46522e+12	3.1069e+12	3.63673e+12
GDP (current US$)	NY.GDP.MKTP.CD	Middle East & North Africa (excluding high income)	MNA	5.0714e+11	5.32014e+11	1.75706e+12	1.61632e+12	1.59238e+12	1.43099e+12	1.46744e+12	1.45519e+12	1.38052e+12	1.39198e+12	1.26384e+12	1.45592e+12
GDP (current US$)	NY.GDP.MKTP.CD	Middle East & North Africa (IDA & IBRD countries)	TMN	5.02613e+11	5.277e+11	1.74485e+12	1.60281e+12	1.57839e+12	1.41702e+12	1.45203e+12	1.43907e+12	1.36425e+12	1.37485e+12	1.24831e+12	1.43788e+12
GDP (current US$)	NY.GDP.MKTP.CD	Middle income	MIC	3.61724e+12	5.76696e+12	2.52441e+13	2.67396e+13	2.76219e+13	2.61888e+13	2.64343e+13	2.90401e+13	3.08446e+13	3.15811e+13	3.04338e+13	3.57859e+13
GDP (current US$)	NY.GDP.MKTP.CD	North America	NAC	6.55867e+12	1.09992e+13	1.80887e+13	1.86963e+13	1.93628e+13	1.97692e+13	2.023e+13	2.1136e+13	2.22597e+13	2.3122e+13	2.2546e+13	2.49939e+13
GDP (current US$)	NY.GDP.MKTP.CD	Not classified	INX	NA	NA	NA	NA	NA	NA	NA	NA	NA	NA	NA	NA
GDP (current US$)	NY.GDP.MKTP.CD	OECD members	OED	1.8798e+13	2.76282e+13	4.86364e+13	4.92916e+13	5.03041e+13	4.74349e+13	4.83549e+13	5.04685e+13	5.33896e+13	5.38987e+13	5.23331e+13	5.79202e+13
GDP (current US$)	NY.GDP.MKTP.CD	Other small states	OSS	5.44346e+10	9.14095e+10	4.14202e+11	4.32289e+11	4.46285e+11	3.69988e+11	3.65902e+11	3.98431e+11	4.41995e+11	4.32763e+11	3.76519e+11	4.47252e+11
GDP (current US$)	NY.GDP.MKTP.CD	Pacific island small states	PSS	2.35158e+09	3.43594e+09	8.18815e+09	8.49875e+09	9.22591e+09	9.02021e+09	9.46161e+09	1.02176e+10	1.06575e+10	1.06443e+10	9.57338e+09	9.74948e+09
GDP (current US$)	NY.GDP.MKTP.CD	Post-demographic dividend	PST	1.83753e+13	2.63949e+13	4.57931e+13	4.62528e+13	4.71737e+13	4.46119e+13	4.56208e+13	4.75591e+13	5.04096e+13	5.09019e+13	4.95293e+13	5.46225e+13
GDP (current US$)	NY.GDP.MKTP.CD	Pre-demographic dividend	PRE	3.93436e+11	2.77541e+11	1.32891e+12	1.45553e+12	1.53015e+12	1.32254e+12	1.21449e+12	1.29392e+12	1.32271e+12	1.39357e+12	1.30975e+12	1.43312e+12
GDP (current US$)	NY.GDP.MKTP.CD	Small states	SST	7.47355e+10	1.29085e+11	4.94531e+11	5.1431e+11	5.30131e+11	4.52543e+11	4.44842e+11	4.81182e+11	5.28084e+11	5.20431e+11	4.52016e+11	5.26938e+11
GDP (current US$)	NY.GDP.MKTP.CD	South Asia	SAS	4.07187e+11	6.30429e+11	2.30009e+12	2.35961e+12	2.58456e+12	2.69943e+12	3.00524e+12	3.42679e+12	3.52731e+12	3.64873e+12	3.48247e+12	4.08777e+12
GDP (current US$)	NY.GDP.MKTP.CD	South Asia (IDA & IBRD)	TSA	4.07187e+11	6.30429e+11	2.30009e+12	2.35961e+12	2.58456e+12	2.69943e+12	3.00524e+12	3.42679e+12	3.52731e+12	3.64873e+12	3.48247e+12	4.08777e+12
GDP (current US$)	NY.GDP.MKTP.CD	Sub-Saharan Africa	SSF	3.7399e+11	4.23078e+11	1.7004e+12	1.80473e+12	1.86867e+12	1.68499e+12	1.5729e+12	1.7044e+12	1.73271e+12	1.79208e+12	1.70609e+12	1.9179e+12
GDP (current US$)	NY.GDP.MKTP.CD	Sub-Saharan Africa (excluding high income)	SSA	3.73621e+11	4.22459e+11	1.69934e+12	1.8034e+12	1.86728e+12	1.68357e+12	1.57141e+12	1.70282e+12	1.73108e+12	1.79039e+12	1.70489e+12	1.91658e+12
GDP (current US$)	NY.GDP.MKTP.CD	Sub-Saharan Africa (IDA & IBRD countries)	TSS	3.7399e+11	4.23078e+11	1.7004e+12	1.80473e+12	1.86867e+12	1.68499e+12	1.5729e+12	1.7044e+12	1.73271e+12	1.79208e+12	1.70609e+12	1.9179e+12
GDP (current US$)	NY.GDP.MKTP.CD	Upper middle income	UMC	2.5737e+12	4.2466e+12	1.89149e+13	2.03068e+13	2.09391e+13	1.96628e+13	1.9549e+13	2.16437e+13	2.33035e+13	2.36863e+13	2.28483e+13	2.71043e+13
GDP (current US$)	NY.GDP.MKTP.CD	World	WLD	2.278e+13	3.38309e+13	7.54881e+13	7.76072e+13	7.97088e+13	7.51793e+13	76465590005079	8.1404e+13	8.6413e+13	8.76529e+13	8.49068e+13	9.61001e+13
Data from database: World Development Indicators
Last Updated: 09/16/2022

## Sheet: GDP_SSP(PPP)
Model	Scenario	Region	Variable	Unit	2010	2015	2020	2025	2030	2035	2040	2045	2050	2055	2060	2065	2070	2075	2080	2085	2090	2095	2100	Notes
OECD Env-Growth	SSP1	ABW	GDP|PPP	billion US$2005/yr	0.151	0.205	0.266	0.357	0.492	0.679	0.926	1.237	1.617	2.067	2.586	3.165	3.797	4.47	5.171	5.842	6.469	7.034	7.505
OECD Env-Growth	SSP2	ABW	GDP|PPP	billion US$2005/yr	0.151	0.205	0.264	0.342	0.442	0.562	0.715	0.905	1.139	1.422	1.762	2.161	2.621	3.138	3.711	4.314	4.951	5.615	6.301
OECD Env-Growth	SSP3	ABW	GDP|PPP	billion US$2005/yr	0.151	0.202	0.254	0.316	0.386	0.458	0.541	0.637	0.746	0.871	1.016	1.184	1.374	1.587	1.824	2.078	2.356	2.661	2.99
OECD Env-Growth	SSP4	ABW	GDP|PPP	billion US$2005/yr	0.151	0.205	0.266	0.359	0.495	0.685	0.938	1.259	1.657	2.136	2.7	3.345	4.061	4.834	5.649	6.458	7.259	8.036	8.774
OECD Env-Growth	SSP5	ABW	GDP|PPP	billion US$2005/yr	0.151	0.208	0.277	0.395	0.589	0.885	1.291	1.823	2.498	3.327	4.318	5.468	6.769	8.208	9.77	11.351	12.921	14.432	15.81
OECD Env-Growth	SSP1	AFG	GDP|PPP	billion US$2005/yr	37.237	47.643	59.153	78.506	109.567	157.25	227.005	324.841	456.674	627.328	839.381	1094.14	1389.58	1722.01	2086.19	2474.19	2878.71	3293.2	3707.96
OECD Env-Growth	SSP2	AFG	GDP|PPP	billion US$2005/yr	37.237	48.185	60.175	77.749	101.896	134.116	177.824	236.506	314.371	415.985	546.228	711.887	920.484	1180.44	1499.32	1884.33	2341.09	2874.95	3490.8
OECD Env-Growth	SSP3	AFG	GDP|PPP	billion US$2005/yr	37.237	48.657	61.865	79.552	101.892	129.443	164.742	209.418	264.787	331.875	411.876	506.733	618.176	747.105	892.395	1053.03	1228.3	1417.8	1621.07
OECD Env-Growth	SSP4	AFG	GDP|PPP	billion US$2005/yr	37.237	48.546	61.385	78.194	98.723	122.492	151.755	187.387	229.826	279.199	335.745	400.507	474.222	556.956	647.457	745.098	849.658	961.343	1080.49
OECD Env-Growth	SSP5	AFG	GDP|PPP	billion US$2005/yr	37.237	47.532	58.848	79.059	114.303	171.645	257.527	380.116	547.707	767.62	1044.54	1383.54	1785.19	2249.36	2776.64	3362.68	4004.53	4700.2	5442.73
OECD Env-Growth	SSP1	AGO	GDP|PPP	billion US$2005/yr	98.686	127.295	171.984	203.363	232.32	261.469	304.102	369.997	464.994	591.431	750.86	942.049	1160.28	1400.12	1655.05	1917.63	2181.82	2441.16	2687.84
OECD Env-Growth	SSP2	AGO	GDP|PPP	billion US$2005/yr	98.686	128.679	172.787	200.062	218.446	228.144	244.75	275.557	324.819	394.374	486.447	603.49	747.486	919.388	1119.58	1347.31	1601.58	1881.08	2184.17
OECD Env-Growth	SSP3	AGO	GDP|PPP	billion US$2005/yr	98.686	128.849	171.468	199.156	217.801	223.319	225.297	231.799	247.196	272.098	306.201	349.531	401.771	462.706	531.346	606.858	688.203	776.162	870.001
OECD Env-Growth	SSP4	AGO	GDP|PPP	billion US$2005/yr	98.686	129.041	172.16	201.272	225.039	240.4	257.078	284.463	329.09	394.028	481.667	594.862	736.232	907.959	1110.02	1342.22	1602.83	1893.98	2214.45
OECD Env-Growth	SSP5	AGO	GDP|PPP	billion US$2005/yr	98.686	127.389	173.632	214.748	264.116	323.521	401.276	510.353	663.75	869.382	1133.13	1456.09	1833.66	2260.13	2727.86	3227.71	3752.11	4292.04	4834.89
OECD Env-Growth	SSP1	ALB	GDP|PPP	billion US$2005/yr	24.545	26.919	30.452	35.126	41.037	48.034	55.608	63.289	70.384	76.939	83.03	88.331	92.473	95.687	98.004	99.153	99.277	98.596	97.006
OECD Env-Growth	SSP2	ALB	GDP|PPP	billion US$2005/yr	24.545	26.994	30.562	34.682	39.071	43.555	48.348	53.341	58.205	63.076	68.08	73.021	77.718	82.299	86.642	90.58	94.198	97.67	101.192
OECD Env-Growth	SSP3	ALB	GDP|PPP	billion US$2005/yr	24.545	27.178	31.008	34.909	38.548	41.695	44.756	47.737	50.445	53.052	55.728	58.445	61.263	64.348	67.486	70.535	73.618	76.925	80.668
OECD Env-Growth	SSP4	ALB	GDP|PPP	billion US$2005/yr	24.545	26.929	30.344	34.169	38.415	42.799	47.378	51.972	56.281	60.448	64.585	68.372	71.538	74.214	76.38	77.91	78.975	79.731	80.229
OECD Env-Growth	SSP5	ALB	GDP|PPP	billion US$2005/yr	24.545	26.838	30.302	35.462	42.765	51.992	62.17	72.826	83.229	93.51	103.79	113.536	121.975	129.225	135.404	140.236	143.913	146.697	148.263
OECD Env-Growth	SSP1	ARE	GDP|PPP	billion US$2005/yr	318.142	439.9	536.362	652.339	787.776	927.181	1061.29	1176.84	1266.67	1343.92	1421.73	1487.36	1535.67	1560.61	1569.9	1565.24	1550.72	1526.11	1486.25
OECD Env-Growth	SSP2	ARE	GDP|PPP	billion US$2005/yr	318.142	441.163	539.009	649.478	770.483	888.156	1003.91	1109.02	1201.11	1290.48	1388.92	1484.08	1572.36	1648.4	1712.85	1764.96	1806.87	1837.58	1855.78
OECD Env-Growth	SSP3	ARE	GDP|PPP	billion US$2005/yr	318.142	429.134	513.489	603.066	701.429	795.596	878.513	936.512	965.922	979.309	993.306	1003.87	1013.84	1023.21	1031.92	1040.87	1050.73	1059.3	1065.18
OECD Env-Growth	SSP4	ARE	GDP|PPP	billion US$2005/yr	318.142	440.399	537.896	654.542	796.523	950.06	1099.31	1226.62	1324.84	1404.32	1482.26	1548.23	1601.5	1638.56	1662.24	1672.72	1673.39	1663.63	1640.71
OECD Env-Growth	SSP5	ARE	GDP|PPP	billion US$2005/yr	318.142	453.516	567.148	720.458	921.726	1160.24	1414.17	1658.83	1875.45	2073.43	2269.34	2449.73	2606.05	2727.41	2826.73	2907.99	2972.88	3018.05	3029.69
IIASA GDP	SSP1	ARG	GDP|PPP	billion US$2005/yr	489.32	604.744	743.706	873.337	994.37	1124.14	1262.47	1399.4	1523.72	1640.95	1756.77	1873.06	1988.3	2099.11	2201.74	2289.24	2359.12	2410.07	2442.31
IIASA GDP	SSP2	ARG	GDP|PPP	billion US$2005/yr	489.32	604.213	734.723	854.341	970.644	1085.94	1200.78	1331	1471.76	1614.32	1754.97	1897.83	2044.59	2193.33	2341.41	2487.76	2632.52	2774.99	2915.65
IIASA GDP	SSP3	ARG	GDP|PPP	billion US$2005/yr	489.32	600.919	717.148	817.537	916.124	1019.09	1125.25	1229.16	1326.12	1420.4	1517.6	1622.46	1736.65	1857.92	1983.69	2113.98	2253.88	2406.99	2576.16
IIASA GDP	SSP4	ARG	GDP|PPP	billion US$2005/yr	489.32	595.911	698.545	773.732	834.302	887.967	936.543	976.487	1004.4	1022.82	1035.55	1045.12	1052.23	1055.33	1054.94	1051.28	1045.61	1038.35	1028.45
IIASA GDP	SSP5	ARG	GDP|PPP	billion US$2005/yr	489.32	605.143	747.864	887.484	1026.36	1182.53	1355.01	1533.45	1715.6	1906.96	2110.8	2324.42	2544.65	2766.3	2983.48	3185.4	3366.93	3524.37	3656.14
OECD Env-Growth	SSP1	ARG	GDP|PPP	billion US$2005/yr	580.427	715.981	861.408	1034.76	1234.96	1460.15	1689.62	1908.12	2112.17	2302.36	2478.59	2639.01	2778.38	2890.06	2983.8	3057.45	3111.06	3144.99	3156.01
OECD Env-Growth	SSP2	ARG	GDP|PPP	billion US$2005/yr	580.427	719.037	867.442	1027.99	1198.22	1375.8	1553.99	1730.24	1911.36	2098.05	2288.14	2480.41	2671.43	2857.56	3041.83	3225.98	3411.15	3595.48	3776.7
OECD Env-Growth	SSP3	ARG	GDP|PPP	billion US$2005/yr	580.427	722.739	875.897	1021.62	1153.87	1270.47	1374.99	1468.19	1561.54	1657.06	1758.35	1867.92	1985.3	2107.25	2230.87	2354.43	2479.79	2607.62	2739.69
OECD Env-Growth	SSP4	ARG	GDP|PPP	billion US$2005/yr	580.427	716.973	859.903	1005.79	1157.43	1308.59	1449.04	1574.7	1696.62	1815.59	1929.64	2034.41	2126.18	2203.07	2272.09	2335.11	2394.71	2451.25	2501.38
OECD Env-Growth	SSP5	ARG	GDP|PPP	billion US$2005/yr	580.427	715.355	861.04	1051.83	1300.41	1599.62	1910.41	2217.79	2519.48	2818.43	3115.02	3408.14	3688.78	3947.5	4196.29	4431.18	4650.81	4853.98	5032.98
IIASA GDP	SSP1	ARM	GDP|PPP	billion US$2005/yr	15.9496	26.3142	39.7954	56.4904	69.8498	77.4392	80.3317	80.6538	80.1742	79.943	80.2877	81.2226	82.5933	84.1968	85.7444	86.9693	87.7236	87.8869	87.7951
IIASA GDP	SSP2	ARM	GDP|PPP	billion US$2005/yr	15.9496	26.4871	39.8451	55.7894	68.1901	75.5933	79.2809	80.8938	81.5001	81.9593	82.7244	84.0169	85.7343	87.6992	89.7595	91.9254	94.3517	97.2222	100.686
IIASA GDP	SSP3	ARM	GDP|PPP	billion US$2005/yr	15.9496	26.5914	40.211	56.7248	69.9457	78.3679	83.2875	86.4194	88.8267	91.1641	93.8435	97.1832	101.22	105.931	111.296	117.433	124.514	132.686	141.996
IIASA GDP	SSP4	ARM	GDP|PPP	billion US$2005/yr	15.9496	26.3649	39.0358	53.1387	62.5789	66.6906	67.3469	66.3323	64.5534	62.6034	60.7707	59.2366	57.9099	56.6806	55.4804	54.3318	53.3166	52.4944	51.8991
IIASA GDP	SSP5	ARM	GDP|PPP	billion US$2005/yr	15.9496	26.2748	39.6901	56.337	69.888	77.9419	81.3921	82.7662	83.6958	85.0322	86.8583	89.2505	92.1414	95.3778	98.6229	101.537	103.944	105.743	107.434
OECD Env-Growth	SSP1	ARM	GDP|PPP	billion US$2005/yr	15.153	18.149	21.519	25.88	31.593	38.44	45.427	51.782	57.013	61.218	65.011	68.784	71.565	73.228	74.461	75.361	76.099	76.478	76.396
OECD Env-Growth	SSP2	ARM	GDP|PPP	billion US$2005/yr	15.153	18.2	21.524	25.1	28.975	32.972	36.923	40.518	43.626	46.431	49.39	52.773	55.94	58.812	61.741	64.848	68.258	71.924	75.794
OECD Env-Growth	SSP3	ARM	GDP|PPP	billion US$2005/yr	15.153	18.322	21.858	25.354	28.684	31.6	34.267	36.5	38.275	39.851	41.691	44.006	46.334	48.659	51.161	53.896	57.008	60.466	64.247
OECD Env-Growth	SSP4	ARM	GDP|PPP	billion US$2005/yr	15.153	18.138	21.342	24.791	28.709	32.851	36.904	40.486	43.445	45.979	48.572	51.389	53.691	55.36	56.84	58.215	59.644	61.077	62.371
OECD Env-Growth	SSP5	ARM	GDP|PPP	billion US$2005/yr	15.153	18.067	21.351	26.147	32.992	41.514	50.073	57.8	64.172	69.381	74.15	79.022	82.883	85.603	87.95	90.056	92.332	94.607	96.688
IIASA GDP	SSP1	AUS	GDP|PPP	billion US$2005/yr	877.883	1121.25	1365.61	1650.02	1945.7	2244.96	2543.16	2838.91	3129.86	3419.42	3711.26	3999.49	4275.01	4532.65	4765.79	4971.87	5146.09	5291.98	5418.62
IIASA GDP	SSP2	AUS	GDP|PPP	billion US$2005/yr	877.883	1123.59	1369.27	1649.35	1932.08	2210.58	2482.44	2748.51	3007.53	3263.18	3518.13	3768.12	4007.5	4232.13	4438.64	4625.95	4790.73	4931.21	5049.74
IIASA GDP	SSP3	AUS	GDP|PPP	billion US$2005/yr	877.883	1041.67	1121.9	1177.77	1229	1284.46	1346.17	1411.21	1474.48	1534.13	1589.2	1638.26	1680.67	1714.56	1738.1	1751.21	1755.25	1752	1741.73
IIASA GDP	SSP4	AUS	GDP|PPP	billion US$2005/yr	877.883	1126.32	1375.06	1654.5	1926.26	2183.47	2428.04	2663.93	2890.11	3109.4	3322.77	3525.21	3712.98	3881.44	4025.45	4141.85	4226.84	4278.9	4302.04
IIASA GDP	SSP5	AUS	GDP|PPP	billion US$2005/yr	877.883	1129.1	1402.5	1753.18	2159.53	2612.25	3102.82	3630.3	4193.07	4795.89	5447.14	6141.65	6864.28	7605.08	8354.44	9107.25	9855.35	10601.6	11356.7
OECD Env-Growth	SSP1	AUS	GDP|PPP	billion US$2005/yr	795.588	941.64	1114	1293.92	1490.87	1710.42	1946.39	2196.84	2444.28	2694.12	2962.47	3242.26	3523.68	3793.24	4048.74	4283.51	4501.05	4706.38	4898.41
OECD Env-Growth	SSP2	AUS	GDP|PPP	billion US$2005/yr	795.588	940.674	1109.6	1274.29	1435.04	1596.71	1767.15	1949.4	2131.34	2318.11	2523.6	2742.5	2968.97	3192.86	3413.91	3627.77	3837.01	4044.01	4248.26
OECD Env-Growth	SSP3	AUS	GDP|PPP	billion US$2005/yr	795.588	929.586	1073.37	1195.44	1295.77	1379.62	1451.78	1514.68	1559.26	1592.71	1628.34	1662.86	1690.58	1705.28	1711.01	1708.79	1704.07	1699.67	1691.01
OECD Env-Growth	SSP4	AUS	GDP|PPP	billion US$2005/yr	795.588	938.34	1103.88	1277.11	1465.84	1674.95	1896.91	2131.05	2362.09	2593.89	2843.17	3101.16	3357.46	3598.01	3825.52	4033.44	4224.58	4400.54	4554.57
OECD Env-Growth	SSP5	AUS	GDP|PPP	billion US$2005/yr	795.588	951.972	1148.95	1382.73	1673.62	2026.66	2432.61	2895.92	3400.8	3958.78	4598.99	5321.88	6127.26	7002.12	7932.69	8912.05	9945.44	11044.2	12219.9
IIASA GDP	SSP1	AUT	GDP|PPP	billion US$2005/yr	307.169	329.64	343.583	358.829	378.591	402.897	431.526	463.36	497.188	532.037	567.341	601.611	633.339	662.473	690.162	716.067	738.958	759.072	777.482
IIASA GDP	SSP2	AUT	GDP|PPP	billion US$2005/yr	307.169	329.665	342.729	355.819	372.005	391.36	413.829	438.535	464.487	490.724	516.784	541.871	565.734	588.532	610.548	631.615	651.21	669.197	685.417
IIASA GDP	SSP3	AUT	GDP|PPP	billion US$2005/yr	307.169	322.97	323.767	321.331	321.176	323.714	328.703	334.839	340.935	346.063	349.809	352.051	353.246	353.466	352.509	350.17	346.602	342.1	336.881
IIASA GDP	SSP4	AUT	GDP|PPP	billion US$2005/yr	307.169	330.246	343.794	356.694	370.923	386.734	404.603	424.094	444.34	464.414	483.515	500.493	515.156	527.541	537.76	545.456	550.098	551.549	549.791
IIASA GDP	SSP5	AUT	GDP|PPP	billion US$2005/yr	307.169	331.024	349.732	374.647	409.653	454.844	510.209	575.196	648.991	731.027	821.499	918.952	1020.91	1126.72	1237.71	1353.66	1473.03	1596.27	1725.08
OECD Env-Growth	SSP1	AUT	GDP|PPP	billion US$2005/yr	296.85	330.984	363.264	395.57	430.982	470.041	511.749	553.608	592.157	629.058	665.734	702.56	737.489	770.436	800.94	827.506	850.606	871.116	889.725
OECD Env-Growth	SSP2	AUT	GDP|PPP	billion US$2005/yr	296.85	330.499	361.062	389.709	418.795	450.296	486.079	524.178	561.294	598.484	636.665	676.178	715.637	754.746	792.451	828.14	861.982	894.444	925.629
OECD Env-Growth	SSP3	AUT	GDP|PPP	billion US$2005/yr	296.85	328.133	352.898	372.269	387.705	400.748	413.397	423.658	428.8	430.604	430.299	428.908	425.113	418.946	410.697	400.494	389.312	377.777	365.453
OECD Env-Growth	SSP4	AUT	GDP|PPP	billion US$2005/yr	296.85	329.765	359.348	390.132	423.521	459.397	496.695	533.155	565.477	595.381	624.32	652.364	677.565	699.586	718.644	734.113	746.75	756.968	763.694
OECD Env-Growth	SSP5	AUT	GDP|PPP	billion US$2005/yr	296.85	332.741	369.241	412.933	467.186	531.481	603.857	683.621	768.156	859.884	961.394	1073.32	1194.53	1325.5	1464.12	1607.84	1756.83	1912.71	2079.11
IIASA GDP	SSP1	AZE	GDP|PPP	billion US$2005/yr	79.2481	186.726	286.19	327.42	343.066	352.179	366.828	385.608	406.734	425.065	441.86	450.883	452.63	447.73	438.549	429.899	424.673	423.4	425.12
IIASA GDP	SSP2	AZE	GDP|PPP	billion US$2005/yr	79.2481	192.086	298.793	342.625	356.72	365.313	381.758	404.484	431.297	454.452	475.312	487.886	493.166	491.744	486.187	482.289	483.829	491.731	504.121
IIASA GDP	SSP3	AZE	GDP|PPP	billion US$2005/yr	79.2481	186.988	286.099	326.872	342.732	353.429	371.497	395.968	425.282	452.109	476.909	493.362	502.835	507.053	509.256	515.49	529.362	551.707	580.768
IIASA GDP	SSP4	AZE	GDP|PPP	billion US$2005/yr	79.2481	190.88	291.053	323.082	322.596	315.517	314.234	316.969	321.319	321.864	320.34	313.612	303.089	289.347	273.994	260.274	249.973	243.084	238.215
IIASA GDP	SSP5	AZE	GDP|PPP	billion US$2005/yr	79.2481	187.063	288.676	334.608	357.173	374.87	399.965	431.038	466.293	497.962	528.875	552.619	570.013	580.685	586.542	593.251	604.632	621.626	643.172
OECD Env-Growth	SSP1	AZE	GDP|PPP	billion US$2005/yr	80.696	91.32	105.154	115.497	128.874	139.459	152.748	167.935	182.697	198.241	217.841	243.198	269.518	291.501	311.407	329.959	348.387	365.686	379.716
OECD Env-Growth	SSP2	AZE	GDP|PPP	billion US$2005/yr	80.696	91.709	105.753	115.758	126.205	130.776	136.835	145.29	155.347	167.574	183.726	204.609	227.308	248.932	271.156	295.178	322.319	351.795	381.645
OECD Env-Growth	SSP3	AZE	GDP|PPP	billion US$2005/yr	80.696	91.911	106.293	116.689	126.925	129.49	129.773	129.201	128.432	129.236	133.254	140.665	149.281	157.851	167.466	178.634	192.266	208.018	225.244
OECD Env-Growth	SSP4	AZE	GDP|PPP	billion US$2005/yr	80.696	91.286	104.768	115.264	127.455	134.308	140.598	147.564	155.376	165.322	179.089	196.746	214.938	230.412	245.205	260.245	276.671	293.622	309.124
OECD Env-Growth	SSP5	AZE	GDP|PPP	billion US$2005/yr	80.696	91.408	105.389	118.894	138.677	158.282	181.027	207.344	236.065	268.942	309.727	360.25	413.75	462.83	510.867	559.524	610.963	663.636	713.869
IIASA GDP	SSP1	BDI	GDP|PPP	billion US$2005/yr	3.5007	4.20775	6.01193	8.4283	11.2132	14.4858	18.4387	23.3696	29.8985	38.684	50.4867	65.7665	84.4738	105.768	128.582	151.959	175.379	202.817	232.731
IIASA GDP	SSP2	BDI	GDP|PPP	billion US$2005/yr	3.5007	3.97632	5.36098	7.08143	8.92707	10.84	12.8578	15.0776	17.7733	21.218	25.6738	31.2633	38.0735	46.1046	55.3708	66.0224	78.3709	92.6592	108.775
IIASA GDP	SSP3	BDI	GDP|PPP	billion US$2005/yr	3.5007	3.80367	4.81072	5.83798	6.70217	7.34343	7.82251	8.20383	8.60371	9.09779	9.70879	10.3974	11.1055	11.8026	12.4631	13.0961	13.723	14.3493	14.9727
IIASA GDP	SSP4	BDI	GDP|PPP	billion US$2005/yr	3.5007	3.80744	4.90532	6.189	7.51618	8.7959	10.0644	11.3658	12.8551	14.673	16.9326	19.6199	22.6526	25.9639	29.4994	33.263	37.3014	41.6316	46.2553
IIASA GDP	SSP5	BDI	GDP|PPP	billion US$2005/yr	3.5007	4.23644	6.21045	9.13867	12.968	17.9883	24.611	33.477	45.8148	63.1327	87.2976	119.762	160.965	209.513	262.847	318.685	375.564	441.923	514.392
OECD Env-Growth	SSP1	BDI	GDP|PPP	billion US$2005/yr	4.389	5.719	7.98	11.816	18.515	29.747	47.267	72.754	107.592	153.043	210.398	279.757	359.927	447.73	540.111	634.341	728.929	822.664	911.779
OECD Env-Growth	SSP2	BDI	GDP|PPP	billion US$2005/yr	4.389	5.761	8.01	11.189	15.805	22.228	31.322	43.744	60.196	81.673	109.477	144.579	187.89	239.53	299.3	367.433	444.559	530.695	624.595
OECD Env-Growth	SSP3	BDI	GDP|PPP	billion US$2005/yr	4.389	5.752	7.89	10.354	13.361	16.706	20.793	25.616	31.144	37.53	45.023	53.76	63.748	74.944	87.09	100.117	114.172	129.224	145.205
OECD Env-Growth	SSP4	BDI	GDP|PPP	billion US$2005/yr	4.389	5.791	8.006	10.527	13.436	16.339	19.655	23.329	27.285	31.593	36.369	41.583	47.182	53.086	59.104	65.183	71.408	77.785	84.342
OECD Env-Growth	SSP5	BDI	GDP|PPP	billion US$2005/yr	4.389	5.756	8.176	12.765	21.728	38.13	64.933	105.418	162.479	239.004	338.241	461.639	608.61	775.194	956.623	1149.96	1353.35	1565.26	1778.82
IIASA GDP	SSP1	BEL	GDP|PPP	billion US$2005/yr	360.573	424.2	509.93	623.638	744.251	863.077	975.851	1082.19	1183.33	1281.97	1380.81	1479.95	1577.55	1672.71	1766.14	1858.51	1947.7	2032.94	2114.29
IIASA GDP	SSP2	BEL	GDP|PPP	billion US$2005/yr	360.573	424.895	510.394	620.648	733.257	840.009	937.774	1026.82	1109	1187.28	1264.39	1340.74	1416.22	1491.02	1565.54	1639.87	1713.6	1786.09	1855.17
IIASA GDP	SSP3	BEL	GDP|PPP	billion US$2005/yr	360.573	380.477	384.152	388.606	397.133	409.137	423.314	437.804	451.301	463.629	474.982	485.252	494.497	502.406	508.779	513.526	516.724	518.252	517.828
IIASA GDP	SSP4	BEL	GDP|PPP	billion US$2005/yr	360.573	426.417	513.756	624.207	732.061	829.1	913.984	988.206	1053.68	1113.12	1168.64	1219.96	1267	1309.05	1345.51	1375.99	1400.59	1419.17	1429.93
IIASA GDP	SSP5	BEL	GDP|PPP	billion US$2005/yr	360.573	426.048	518.07	646.208	792.029	947.148	1106.31	1268.56	1434.72	1608.17	1793.54	1992.44	2202.42	2421.94	2651.63	2893	3144.94	3408.38	3685.1
OECD Env-Growth	SSP1	BEL	GDP|PPP	billion US$2005/yr	357.666	386.55	420.166	461.282	511.964	570.807	633.155	694.686	754.294	814.612	877.634	942.284	1005.43	1066.46	1126.02	1183.79	1239.18	1292.56	1343.68
OECD Env-Growth	SSP2	BEL	GDP|PPP	billion US$2005/yr	357.666	385.894	418.201	456.962	502.917	555.813	613.192	671.95	731.121	792.525	857.522	924.727	991.932	1058.69	1125.45	1192.17	1259.22	1326.7	1393.09
OECD Env-Growth	SSP3	BEL	GDP|PPP	billion US$2005/yr	357.666	382.904	409.444	436.363	464.168	491.664	516.515	535.995	549.873	560.723	570.205	577.541	580.515	579.405	576.062	570.708	564.153	556.402	546.435
OECD Env-Growth	SSP4	BEL	GDP|PPP	billion US$2005/yr	357.666	384.764	415.211	453.149	499.519	551.823	605.236	656.391	704.421	751.732	799.837	846.512	888.444	925.292	959.043	989.879	1018.57	1044.83	1065.83
OECD Env-Growth	SSP5	BEL	GDP|PPP	billion US$2005/yr	357.666	388.798	427.678	480.985	551.859	638.749	737.048	844.77	962.452	1094.57	1245.27	1414.61	1601.08	1805.26	2027.3	2267.35	2524.77	2801.81	3102.27
IIASA GDP	SSP1	BEN	GDP|PPP	billion US$2005/yr	9.81191	11.9639	15.0715	19.7038	25.7823	33.7552	44.0815	57.4575	74.4963	95.304	119.83	147.957	179.476	213.636	252.931	296.453	341.806	385.262	424.764
IIASA GDP	SSP2	BEN	GDP|PPP	billion US$2005/yr	9.81191	11.6359	14.0633	17.4456	21.6151	26.6553	32.6763	39.9675	48.8042	59.2407	71.4026	85.4825	101.703	120.28	141.544	165.736	193.091	223.701	257.559
IIASA GDP	SSP3	BEN	GDP|PPP	billion US$2005/yr	9.81191	11.5703	13.6998	16.3143	19.1108	22.0377	25.0376	28.1735	31.4471	34.7852	38.1191	41.4351	44.7443	48.0228	51.2909	54.5362	57.8436	61.2213	64.7307
IIASA GDP	SSP4	BEN	GDP|PPP	billion US$2005/yr	9.81191	11.5374	13.7307	16.6187	20.0293	23.9576	28.416	33.5387	39.4145	46.0263	53.3573	61.3989	70.1507	79.549	89.6211	100.349	111.907	124.344	137.826
IIASA GDP	SSP5	BEN	GDP|PPP	billion US$2005/yr	9.81191	11.9882	15.3011	20.5752	28.0639	38.6085	53.1673	73.1082	99.8449	134.213	176.784	227.815	287.105	353.248	430.02	515.775	606.15	696.99	793.501
OECD Env-Growth	SSP1	BEN	GDP|PPP	billion US$2005/yr	12.601	15.02	19.378	26.723	38.283	56.012	82.082	118.813	168.465	232.796	312.832	408.131	516.931	636.096	763.855	897.097	1032.76	1167.84	1297.97
OECD Env-Growth	SSP2	BEN	GDP|PPP	billion US$2005/yr	12.601	15.174	19.318	25.282	33.205	43.426	57.238	75.681	99.895	131.145	170.893	220.483	281.109	353.445	438.376	536.573	648.647	774.866	914.833
OECD Env-Growth	SSP3	BEN	GDP|PPP	billion US$2005/yr	12.601	15.257	19.279	24.371	30.3	36.738	44.409	53.559	64.245	76.62	90.772	106.76	124.674	144.454	166.149	189.598	215.038	242.353	271.647
OECD Env-Growth	SSP4	BEN	GDP|PPP	billion US$2005/yr	12.601	15.278	19.321	24.285	29.873	35.352	41.444	48.246	55.653	63.653	72.182	81.156	90.56	100.292	110.351	120.628	131.301	142.361	153.974
OECD Env-Growth	SSP5	BEN	GDP|PPP	billion US$2005/yr	12.601	15.035	19.494	27.67	41.991	65.912	102.626	156.169	230.639	329.592	455.759	609.907	790.918	995.493	1222.19	1467.55	1727.82	1999.02	2274.29
IIASA GDP	SSP1	BFA	GDP|PPP	billion US$2005/yr	14.1713	16.9756	20.2133	24.9149	31.6296	40.241	51.7755	66.9644	85.8622	110.085	141.826	183.314	235.524	298.057	369.314	446.801	527.818	609.807	690.677
IIASA GDP	SSP2	BFA	GDP|PPP	billion US$2005/yr	14.1713	16.1842	18.2632	21.3116	25.8069	31.1671	37.854	46.0749	56.5383	69.987	87.1741	108.729	135.316	167.507	205.981	251.449	304.415	367.285	441.571
IIASA GDP	SSP3	BFA	GDP|PPP	billion US$2005/yr	14.1713	16.2905	16.7365	17.3144	18.8718	21.3276	25.3459	30.4379	36.2184	42.2243	48.4058	54.7016	61.1185	67.6015	74.0937	80.5921	87.167	93.8831	100.792
IIASA GDP	SSP4	BFA	GDP|PPP	billion US$2005/yr	14.1713	15.541	14.9701	14.6881	15.734	18.0255	21.5075	26.1306	31.8855	38.7749	46.8106	56.078	66.7131	78.8928	92.8005	108.616	126.515	146.748	169.515
IIASA GDP	SSP5	BFA	GDP|PPP	billion US$2005/yr	14.1713	16.9816	20.3986	25.6933	33.7909	45.0029	60.9954	83.2929	112.763	152.264	205.726	277.437	369.927	483.32	615.317	761.715	917.662	1078.38	1244.88
OECD Env-Growth	SSP1	BFA	GDP|PPP	billion US$2005/yr	18.709	24.921	34.144	48.982	71.961	106.496	155.782	223.38	312.921	426.941	566.422	730.94	918.28	1124.34	1347.2	1582.88	1826.26	2072.62	2315.26
OECD Env-Growth	SSP2	BFA	GDP|PPP	billion US$2005/yr	18.709	25.287	34.931	48.346	66.267	89.67	121.424	164.2	220.999	295.065	389.477	507.973	654.037	830.084	1038.1	1279.56	1554.49	1863.08	2204.44
OECD Env-Growth	SSP3	BFA	GDP|PPP	billion US$2005/yr	18.709	25.597	35.536	47.599	61.498	76.863	95.245	117.438	143.99	175.427	212.042	254.389	302.952	357.525	417.741	483.243	553.721	629.076	709.11
OECD Env-Growth	SSP4	BFA	GDP|PPP	billion US$2005/yr	18.709	25.566	35.362	46.849	59.462	72.169	86.54	103.056	121.9	143.212	166.938	193.333	222.551	254.272	288.156	324.016	361.787	401.637	443.733
OECD Env-Growth	SSP5	BFA	GDP|PPP	billion US$2005/yr	18.709	24.884	34.129	50.138	77.421	121.423	186.044	276.461	398.143	555.393	750.684	985.681	1259.64	1569.57	1916.41	2297.68	2709.45	3148.04	3605.86
IIASA GDP	SSP1	BGD	GDP|PPP	billion US$2005/yr	214.759	264.544	328.731	401.179	488.887	595.479	728.037	883.622	1063.48	1266.2	1517.44	1803.9	2097.87	2361.17	2576.97	2743.01	2866.25	2954.51	3011.7
IIASA GDP	SSP2	BGD	GDP|PPP	billion US$2005/yr	214.759	261.38	313.452	363.606	418.708	482.204	559.105	648.147	749.488	865.004	995.15	1138.76	1295	1465.25	1674.47	1913.44	2162.66	2398.55	2614.38
IIASA GDP	SSP3	BGD	GDP|PPP	billion US$2005/yr	214.759	260.859	306.618	341.178	369.785	395.587	421.782	446.945	470.3	492.871	515.336	538.031	561.546	587.187	614.306	642.537	672.227	704.392	740.132
IIASA GDP	SSP4	BGD	GDP|PPP	billion US$2005/yr	214.759	257.861	299.806	330.83	357.565	383.644	413.078	443.785	474.54	504.63	533.435	559.889	583.606	605.675	625.878	643.557	658.612	672.131	684.441
IIASA GDP	SSP5	BGD	GDP|PPP	billion US$2005/yr	214.759	264.4	331.004	411.76	517.601	655.492	836.461	1059.84	1328.65	1642.03	2035.78	2494.44	2978.53	3429.33	3817.36	4135.23	4403.22	4687.05	5024.69
OECD Env-Growth	SSP1	BGD	GDP|PPP	billion US$2005/yr	221.297	299.557	422.378	596.861	840.967	1172.14	1590.47	2084.68	2636.73	3232.56	3854.01	4475.12	5077.04	5651.81	6181.94	6656.78	7074.77	7440.37	7746.92
OECD Env-Growth	SSP2	BGD	GDP|PPP	billion US$2005/yr	221.297	301.561	424.974	576.478	750.712	946.445	1179.1	1448.13	1754.13	2101.2	2492.44	2925.63	3402.03	3923.21	4476.56	5058.33	5667.91	6308.26	6975.53
OECD Env-Growth	SSP3	BGD	GDP|PPP	billion US$2005/yr	221.297	303.325	429.037	569.094	707.552	833.948	965.74	1100.23	1236.33	1377.87	1528.62	1688.64	1861.91	2051.3	2251.45	2462.87	2689.58	2936.54	3207.75
OECD Env-Growth	SSP4	BGD	GDP|PPP	billion US$2005/yr	221.297	299.735	416.077	539.953	653.221	738.181	811.585	870.174	914.328	947.845	972.679	987.017	992.465	991.987	985.431	974.122	960.478	946.511	932.193
OECD Env-Growth	SSP5	BGD	GDP|PPP	billion US$2005/yr	221.297	298.827	422.673	616.648	917.807	1356.4	1920.86	2598.08	3366.51	4211.39	5113.05	6043.47	6980.3	7917.6	8836.33	9722.86	10574.8	11399	12184.1
IIASA GDP	SSP1	BGR	GDP|PPP	billion US$2005/yr	78.6966	100.293	115.792	129.483	140.486	149.385	156.956	163.698	169.565	174.643	178.898	182.672	186.543	190.651	194.812	198.743	201.958	203.978	204.772
IIASA GDP	SSP2	BGR	GDP|PPP	billion US$2005/yr	78.6966	100.628	115.778	127.919	136.632	143.388	149.454	155.481	161.451	167.398	173.278	178.62	183.023	187.089	191.413	196.314	201.752	207.516	213.315
IIASA GDP	SSP3	BGR	GDP|PPP	billion US$2005/yr	78.6966	100.681	114.914	124.609	129.624	132.183	134.007	135.935	138.092	140.656	143.779	147.5	151.858	156.976	162.885	169.525	176.755	184.417	192.324
IIASA GDP	SSP4	BGR	GDP|PPP	billion US$2005/yr	78.6966	100.13	113.318	121.76	125.491	126.793	127.204	127.338	127.094	126.773	126.613	126.517	126.252	125.523	124.21	122.358	120.101	117.453	114.36
IIASA GDP	SSP5	BGR	GDP|PPP	billion US$2005/yr	78.6966	100.379	116.8	133.027	148.458	163.264	177.645	191.62	204.77	218.974	235.691	254.925	275.759	297.062	318.024	338.075	356.295	371.664	383.823
OECD Env-Growth	SSP1	BGR	GDP|PPP	billion US$2005/yr	86.738	96.128	119.24	146.755	178.81	212.243	242.887	268.482	289.035	306.646	323.521	338.174	347.837	352.057	353.496	353.2	351.395	347.912	341.909
OECD Env-Growth	SSP2	BGR	GDP|PPP	billion US$2005/yr	86.738	96.14	118.414	141.504	165.035	187.524	208.546	227.666	245.587	263.718	283.47	303.292	321.149	336.395	350.168	362.968	375.029	386.216	396.137
OECD Env-Growth	SSP3	BGR	GDP|PPP	billion US$2005/yr	86.738	96.323	118	137.046	152.869	164.509	173.646	180.681	186.932	193.854	203.021	213.747	224.637	235.195	245.658	256.171	267.174	278.647	290.298
OECD Env-Growth	SSP4	BGR	GDP|PPP	billion US$2005/yr	86.738	95.973	117.827	139.787	162.195	182.856	201.16	216.763	230.805	244.681	259.687	273.807	284.855	292.288	297.591	301.299	304.043	305.802	305.755
OECD Env-Growth	SSP5	BGR	GDP|PPP	billion US$2005/yr	86.738	96.067	120.07	152.784	194.178	239.728	283.306	323.034	358.925	393.433	428.929	462.985	491.79	514.358	533.757	551.132	566.477	579.22	587.779
IIASA GDP	SSP1	BHR	GDP|PPP	billion US$2005/yr	26.9282	45.9581	64.0282	79.6885	96.1531	113.846	132.998	153.016	172.939	192.051	209.819	225.685	239.281	250.2	258.414	264.107	267.355	268.447	267.578
IIASA GDP	SSP2	BHR	GDP|PPP	billion US$2005/yr	26.9282	46.1635	64.5328	80.3146	96.7508	114.513	134.12	155.269	177.089	198.762	219.699	239.398	257.517	273.759	288.036	300.486	311.322	320.679	328.409
IIASA GDP	SSP3	BHR	GDP|PPP	billion US$2005/yr	26.9282	45.476	63.2482	76.2493	87.5828	98.1891	109.997	123.045	136.655	150.003	162.853	175.463	188.243	201.523	215.392	229.685	244.048	258.049	271.148
IIASA GDP	SSP4	BHR	GDP|PPP	billion US$2005/yr	26.9282	45.8268	62.7438	75.5238	87.232	98.6637	110.193	121.364	131.304	139.556	146.163	151.4	155.499	158.438	160.224	160.951	160.785	159.753	157.732
IIASA GDP	SSP5	BHR	GDP|PPP	billion US$2005/yr	26.9282	46.7251	67.5219	88.3437	112.306	139.817	170.96	204.99	240.615	276.958	313.516	349.39	383.602	414.853	442.48	466.237	485.674	500.422	510.051
OECD Env-Growth	SSP1	BHR	GDP|PPP	billion US$2005/yr	26.934	35.187	44.72	57.227	72.013	88.684	106.143	122.512	137.333	152.168	167.596	182.027	194.493	204.122	211.205	216.261	219.833	221.741	221.154
OECD Env-Growth	SSP2	BHR	GDP|PPP	billion US$2005/yr	26.934	35.348	44.987	57.472	71.569	87.237	103.751	120.287	136.863	154.796	174.582	194.733	214.473	232.83	249.401	264.498	278.556	291.297	301.978
OECD Env-Growth	SSP3	BHR	GDP|PPP	billion US$2005/yr	26.934	34.484	42.89	52.121	60.938	69.075	76.728	83.502	89.999	97.87	107.75	118.659	130.073	141.485	152.637	163.611	174.563	185.091	194.625
OECD Env-Growth	SSP4	BHR	GDP|PPP	billion US$2005/yr	26.934	35.243	44.59	56.275	69.247	83.012	97.175	111.106	124.992	140.377	157.541	174.598	190.655	204.831	216.942	227.18	235.966	243.084	247.819
OECD Env-Growth	SSP5	BHR	GDP|PPP	billion US$2005/yr	26.934	36.173	46.788	61.935	80.992	104.058	129.828	156.566	183.36	211.932	243.159	274.956	305.475	333.251	358.584	381.943	403.599	422.802	437.582
IIASA GDP	SSP1	BHS	GDP|PPP	billion US$2005/yr	8.74156	10.9104	12.3267	14.1484	16.2266	18.3818	20.5397	22.6666	24.6775	26.557	28.3013	29.8927	31.32	32.5676	33.6074	34.4286	34.9281	35.0942	34.956
IIASA GDP	SSP2	BHS	GDP|PPP	billion US$2005/yr	8.74156	10.9443	12.3871	14.2208	16.3324	18.5676	20.8732	23.2303	25.5701	27.8731	30.1416	32.3551	34.4766	36.486	38.3734	40.1518	41.8198	43.411	44.9361
IIASA GDP	SSP3	BHS	GDP|PPP	billion US$2005/yr	8.74156	10.463	10.8794	11.5308	12.5449	13.8173	15.22	16.7212	18.275	19.8733	21.5116	23.196	24.9315	26.7575	28.7114	30.8247	33.1146	35.5921	38.2517
IIASA GDP	SSP4	BHS	GDP|PPP	billion US$2005/yr	8.74156	10.8719	11.9184	13.2043	14.6291	16.094	17.4697	18.7196	19.7728	20.6478	21.3827	22.0087	22.5393	22.9669	23.2733	23.4551	23.5162	23.4759	23.349
IIASA GDP	SSP5	BHS	GDP|PPP	billion US$2005/yr	8.74156	10.9469	12.5	14.6312	17.2235	20.0972	23.1648	26.3802	29.6351	32.8888	36.1195	39.273	42.303	45.1549	47.764	50.0873	51.9539	53.3081	54.1587
OECD Env-Growth	SSP1	BHS	GDP|PPP	billion US$2005/yr	9.647	10.852	12.364	13.913	15.577	17.4	19.244	21.071	22.657	24.061	25.282	26.374	27.331	27.979	28.462	28.752	28.843	28.773	28.526
OECD Env-Growth	SSP2	BHS	GDP|PPP	billion US$2005/yr	9.647	10.905	12.473	13.941	15.315	16.668	18.052	19.504	20.907	22.313	23.738	25.225	26.787	28.271	29.701	31.052	32.31	33.488	34.616
OECD Env-Growth	SSP3	BHS	GDP|PPP	billion US$2005/yr	9.647	10.895	12.433	13.661	14.604	15.382	16.097	16.809	17.441	18.048	18.654	19.337	20.131	20.932	21.737	22.522	23.304	24.1	24.939
OECD Env-Growth	SSP4	BHS	GDP|PPP	billion US$2005/yr	9.647	10.862	12.369	13.799	15.279	16.823	18.331	19.809	21.134	22.363	23.515	24.61	25.647	26.469	27.164	27.691	28.09	28.395	28.584
OECD Env-Growth	SSP5	BHS	GDP|PPP	billion US$2005/yr	9.647	10.887	12.498	14.367	16.684	19.453	22.427	25.551	28.551	31.468	34.292	37.051	39.711	42.017	44.129	46.01	47.633	49.027	50.126
IIASA GDP	SSP1	BIH	GDP|PPP	billion US$2005/yr	32.83	38.29	53.6455	66.9008	78.0483	87.1774	94.5687	100.546	105.27	109.173	112.61	115.724	118.492	120.764	122.397	123.122	122.669	121.204	119.271
IIASA GDP	SSP2	BIH	GDP|PPP	billion US$2005/yr	32.83	38.3046	53.4602	66.165	76.5136	84.8008	91.4717	97.049	101.784	105.775	109.346	112.641	115.703	118.515	121.104	123.521	125.886	128.351	131.074
IIASA GDP	SSP3	BIH	GDP|PPP	billion US$2005/yr	32.83	38.3266	53.3905	65.6712	75.1562	82.2057	87.4111	91.515	94.9954	97.9291	100.438	102.809	105.328	108.275	111.829	116.082	121.063	126.789	133.235
IIASA GDP	SSP4	BIH	GDP|PPP	billion US$2005/yr	32.83	38.1905	52.7087	63.8376	71.6007	76.6751	79.8089	81.642	82.4652	82.4019	81.6601	80.4889	79.094	77.5816	75.9775	74.2987	72.6064	70.9597	69.4217
IIASA GDP	SSP5	BIH	GDP|PPP	billion US$2005/yr	32.83	38.3283	54.0493	68.3598	81.4668	93.3919	104.23	114.088	123.617	133.163	142.9	152.591	162.036	170.9	178.864	185.413	189.991	192.699	194.245
OECD Env-Growth	SSP1	BIH	GDP|PPP	billion US$2005/yr	28.065	30.809	37.787	47.037	57.74	69.273	80.304	89.614	96.512	101.533	105.79	108.039	109.08	108.896	107.453	105.156	102.274	99.093	95.538
OECD Env-Growth	SSP2	BIH	GDP|PPP	billion US$2005/yr	28.065	30.826	37.579	45.632	53.94	62.179	70.17	77.246	83.032	87.985	92.872	96.603	99.827	102.467	104.264	105.609	106.694	107.697	108.748
OECD Env-Growth	SSP3	BIH	GDP|PPP	billion US$2005/yr	28.065	30.859	37.511	44.73	51.348	57.062	62.093	66.096	68.913	71.128	73.486	75.291	77.119	78.91	80.328	81.593	82.895	84.355	86.054
OECD Env-Growth	SSP4	BIH	GDP|PPP	billion US$2005/yr	28.065	30.764	37.377	45.173	53.339	61.379	68.936	75.275	80.02	83.691	87.161	89.164	90.305	90.534	89.782	88.464	86.907	85.298	83.587
OECD Env-Growth	SSP5	BIH	GDP|PPP	billion US$2005/yr	28.065	30.799	37.978	48.557	61.832	76.844	91.632	104.935	115.956	125.297	134.23	141.058	146.504	150.487	152.868	154.086	154.434	154.265	153.375
IIASA GDP	SSP1	BLR	GDP|PPP	billion US$2005/yr	124.877	168.784	203.16	221.785	231.99	238.66	244.807	250.796	256.428	262.469	269.732	278.037	286.833	295.397	303.084	309.643	314.762	318.144	320.474
IIASA GDP	SSP2	BLR	GDP|PPP	billion US$2005/yr	124.877	169.53	204.186	221.851	230.37	235.785	241.634	248.459	255.368	262.536	270.644	279.884	289.973	300.463	311.006	321.614	332.602	344.296	356.773
IIASA GDP	SSP3	BLR	GDP|PPP	billion US$2005/yr	124.877	170.09	204.984	221.881	228.761	232.343	236.636	242.564	249.545	257.013	265.488	275.578	287.724	302.084	318.559	337.04	357.582	380.342	405.306
IIASA GDP	SSP4	BLR	GDP|PPP	billion US$2005/yr	124.877	168.923	200.899	213.347	214.828	212.587	210.526	209.16	207.533	205.338	202.966	200.673	198.492	196.433	194.391	192.38	190.53	188.902	187.414
IIASA GDP	SSP5	BLR	GDP|PPP	billion US$2005/yr	124.877	168.916	204.527	226.282	241.592	254.737	268.099	283.078	300.008	319.436	341.734	366.257	392.113	418.164	443.386	467.243	489.055	508.035	524.83
OECD Env-Growth	SSP1	BLR	GDP|PPP	billion US$2005/yr	118.671	145.259	176.778	211.172	250.038	292.074	330.894	362.482	385.669	404.928	424.762	443.176	455.985	461.441	462.309	461.472	459.908	456.94	451.145
OECD Env-Growth	SSP2	BLR	GDP|PPP	billion US$2005/yr	118.671	145.398	176.267	205.923	234.472	262.236	287.769	309.577	327.584	345.345	366.346	388.913	409.969	427.68	442.968	457.897	473.601	490.053	505.94
OECD Env-Growth	SSP3	BLR	GDP|PPP	billion US$2005/yr	118.671	145.651	176.105	201.695	222.019	237.794	250.293	258.887	264.355	270.416	280.249	292.872	305.916	317.972	329.232	340.992	354.258	369.052	384.571
OECD Env-Growth	SSP4	BLR	GDP|PPP	billion US$2005/yr	118.671	144.998	174.784	202.633	229.841	255.516	278.533	297.071	311.289	324.978	341.163	357.206	369.718	377.135	381.345	384.514	387.664	390.587	391.77
OECD Env-Growth	SSP5	BLR	GDP|PPP	billion US$2005/yr	118.671	145.147	177.168	216.865	266.159	322.456	376.506	424.503	465.012	503.192	544.293	585.44	620.998	648.367	670.707	691.504	711.865	730.512	744.978
IIASA GDP	SSP1	BLZ	GDP|PPP	billion US$2005/yr	2.60062	3.17211	3.87391	4.76815	5.63487	6.44889	7.21889	7.95718	8.70299	9.44069	10.1328	10.7492	11.5291	12.4571	13.5003	14.5588	15.5651	16.4685	17.2289
IIASA GDP	SSP2	BLZ	GDP|PPP	billion US$2005/yr	2.60062	3.09839	3.63647	4.31275	4.98705	5.66311	6.34647	7.05685	7.79594	8.58669	9.44035	10.3676	11.3543	12.37	13.3865	14.3883	15.7451	17.4698	19.4952
IIASA GDP	SSP3	BLZ	GDP|PPP	billion US$2005/yr	2.60062	3.06099	3.52749	4.12108	4.7271	5.34625	5.96448	6.58313	7.18909	7.81263	8.47602	9.19958	9.99129	10.8462	11.7547	12.7103	13.7293	14.8347	16.0545
IIASA GDP	SSP4	BLZ	GDP|PPP	billion US$2005/yr	2.60062	3.04495	3.47408	3.98774	4.47798	4.95057	5.41048	5.8725	6.34021	6.84846	7.42993	8.10102	8.84992	9.66022	10.5267	11.4578	12.4776	13.6088	14.8718
IIASA GDP	SSP5	BLZ	GDP|PPP	billion US$2005/yr	2.60062	3.17227	3.87893	4.77527	5.64295	6.45621	7.22467	7.95725	8.70151	9.43665	10.1387	10.8298	11.8505	13.1934	14.7671	16.3995	17.9963	19.5226	20.9864
OECD Env-Growth	SSP1	BLZ	GDP|PPP	billion US$2005/yr	2.061	2.266	2.592	3.141	3.903	4.861	5.977	7.218	8.521	9.869	11.223	12.574	13.881	15.116	16.32	17.463	18.516	19.481	20.309
OECD Env-Growth	SSP2	BLZ	GDP|PPP	billion US$2005/yr	2.061	2.289	2.611	3.077	3.653	4.315	5.08	5.949	6.919	8	9.2	10.539	12.018	13.631	15.38	17.261	19.283	21.455	23.786
OECD Env-Growth	SSP3	BLZ	GDP|PPP	billion US$2005/yr	2.061	2.306	2.642	3.077	3.566	4.083	4.652	5.277	5.95	6.679	7.461	8.319	9.273	10.319	11.449	12.654	13.951	15.362	16.904
OECD Env-Growth	SSP4	BLZ	GDP|PPP	billion US$2005/yr	2.061	2.301	2.595	2.93	3.312	3.677	4.059	4.457	4.869	5.307	5.781	6.308	6.894	7.538	8.238	8.996	9.829	10.756	11.792
OECD Env-Growth	SSP5	BLZ	GDP|PPP	billion US$2005/yr	2.061	2.261	2.574	3.138	3.989	5.121	6.434	7.884	9.398	10.96	12.552	14.185	15.797	17.376	19.013	20.667	22.332	24.057	25.806
IIASA GDP	SSP1	BOL	GDP|PPP	billion US$2005/yr	37.0635	44.6856	52.9433	62.8746	75.873	93.0945	114.717	139.592	165.566	190.571	213.17	233.024	250.617	266.383	280.455	292.719	303.041	311.363	319.725
IIASA GDP	SSP2	BOL	GDP|PPP	billion US$2005/yr	37.0635	44.5497	51.5419	59.3373	69.5991	82.8441	98.8322	117.947	139.808	163.739	188.655	213.98	239.34	264.522	289.089	312.84	335.625	357.537	378.634
IIASA GDP	SSP3	BOL	GDP|PPP	billion US$2005/yr	37.0635	44.3248	50.0212	55.5009	62.5142	71.6014	82.2204	93.7686	105.305	116.696	128.046	139.945	152.658	166.308	180.794	195.931	211.912	228.895	247.236
IIASA GDP	SSP4	BOL	GDP|PPP	billion US$2005/yr	37.0635	44.0203	49.3711	54.5237	61.4068	70.6773	82.134	95.4523	109.862	125.275	141.811	160.111	180.426	202.872	227.356	253.726	282.27	313.191	346.936
IIASA GDP	SSP5	BOL	GDP|PPP	billion US$2005/yr	37.0635	44.6442	53.0667	63.6092	77.9868	97.8368	123.635	154.191	186.837	218.93	248.509	275.126	299.371	321.814	346.242	375.874	412.283	455.027	503.122
OECD Env-Growth	SSP1	BOL	GDP|PPP	billion US$2005/yr	43.19	54.225	68.298	89.307	118.718	156.997	203.564	257.63	317.65	382.615	450.589	520.14	588.911	655.472	720.418	782.093	839.14	891.251	937.632
OECD Env-Growth	SSP2	BOL	GDP|PPP	billion US$2005/yr	43.19	54.698	69.511	89.569	113.995	142.494	176.448	216.479	262.786	315.515	374.464	439.964	511.757	589.783	673.652	762.418	855.439	952.624	1053.58
OECD Env-Growth	SSP3	BOL	GDP|PPP	billion US$2005/yr	43.19	55.42	71.534	90.497	110.77	131.328	153.94	178.918	206.496	237.111	271.195	309.532	352.474	400.218	452.488	508.449	568.586	632.96	702.278
OECD Env-Growth	SSP4	BOL	GDP|PPP	billion US$2005/yr	43.19	55.236	71.133	90.481	113.806	140.891	173.438	212.412	258.825	313.815	378.283	454.076	542.829	645.775	763.35	895.503	1043.66	1208.87	1393.53
OECD Env-Growth	SSP5	BOL	GDP|PPP	billion US$2005/yr	43.19	54.059	67.786	89.755	123.32	169.51	226.442	293.415	368.789	451.784	540.442	633.904	729.47	826.054	925.928	1027.46	1129.57	1232.47	1335.44
IIASA GDP	SSP1	BRA	GDP|PPP	billion US$2005/yr	1859.34	2189.46	2605.04	3016.14	3422.24	3903.81	4472.04	5096.93	5719.72	6287.14	6752.4	7144.89	7505.46	7855.31	8185.59	8475.86	8695.67	8836.6	8898.74
IIASA GDP	SSP2	BRA	GDP|PPP	billion US$2005/yr	1859.34	2186.96	2581.68	2956.54	3324.47	3701.12	4102.65	4621.41	5244.76	5910.94	6533.08	7072.12	7542.12	7982.94	8419.66	8856.14	9288.11	9716.32	10138
IIASA GDP	SSP3	BRA	GDP|PPP	billion US$2005/yr	1859.34	2186.94	2566.66	2901.47	3210.71	3521.35	3860.37	4233.78	4650.21	5087.65	5523.02	5926.82	6299.23	6670.59	7047.2	7430.62	7826.93	8253.31	8730.8
IIASA GDP	SSP4	BRA	GDP|PPP	billion US$2005/yr	1859.34	2172.7	2513.68	2775.7	2977.82	3154.02	3334.54	3522.46	3726.19	3921.05	4083.45	4183.77	4220.29	4216.89	4186.02	4129.41	4049.6	3957.85	3857.85
IIASA GDP	SSP5	BRA	GDP|PPP	billion US$2005/yr	1859.34	2191.53	2623.84	3078.54	3562.46	4161.3	4889.24	5713.33	6562.87	7386.81	8203.56	9033.73	9891.15	10759.4	11614.1	12419.6	13125.5	13712.2	14171.5
OECD Env-Growth	SSP1	BRA	GDP|PPP	billion US$2005/yr	1967.54	2303.63	2796.63	3352.74	3996.14	4746.48	5564.08	6401.21	7214.07	8003.39	8752.9	9417.13	9990.13	10500.3	10932.9	11279.2	11525.4	11679.8	11736.1
OECD Env-Growth	SSP2	BRA	GDP|PPP	billion US$2005/yr	1967.54	2313.37	2814.73	3308.15	3776.17	4225.47	4687.93	5153.78	5613.1	6082.41	6559.79	7025.86	7488.78	7966.35	8436.35	8899.19	9362.07	9833.18	10312.2
OECD Env-Growth	SSP3	BRA	GDP|PPP	billion US$2005/yr	1967.54	2322.98	2833.34	3275.81	3616.06	3857.54	4058.53	4216.96	4333.19	4433.3	4522.29	4593.82	4657.65	4724.3	4775.3	4809.9	4836.09	4859.77	4883.42
OECD Env-Growth	SSP4	BRA	GDP|PPP	billion US$2005/yr	1967.54	2307.06	2790.7	3250.37	3693.67	4118.37	4542.88	4950.71	5332.21	5711.07	6085.49	6422.68	6724.72	7011.57	7268.89	7494.15	7698.96	7894.71	8076.03
OECD Env-Growth	SSP5	BRA	GDP|PPP	billion US$2005/yr	1967.54	2302.62	2800.47	3425.07	4239	5262.76	6409.81	7628.86	8867.72	10129.9	11397.9	12610.9	13753	14862.1	15917.5	16903	17790.6	18583.6	19261
IIASA GDP	SSP1	BRB	GDP|PPP	billion US$2005/yr	6.52751	5.87186	5.39186	5.12859	5.23333	5.60158	6.11696	6.67636	7.19508	7.63462	7.99495	8.32045	8.64174	8.96116	9.241	9.45834	9.5865	9.60215	9.49713
IIASA GDP	SSP2	BRB	GDP|PPP	billion US$2005/yr	6.52751	5.86832	5.38122	5.08051	5.09161	5.32445	5.72434	6.21233	6.71529	7.18713	7.61547	8.00158	8.37992	8.76979	9.17577	9.58735	9.98786	10.371	10.7364
IIASA GDP	SSP3	BRB	GDP|PPP	billion US$2005/yr	6.52751	5.86815	5.34396	4.95117	4.84668	4.94561	5.15095	5.35287	5.50594	5.59482	5.66186	5.74901	5.89909	6.08892	6.29966	6.51847	6.75746	7.03409	7.36657
IIASA GDP	SSP4	BRB	GDP|PPP	billion US$2005/yr	6.52751	5.8492	5.27031	4.80102	4.60183	4.59477	4.68713	4.77233	4.80346	4.75818	4.66975	4.56763	4.48533	4.40352	4.31585	4.21345	4.09887	3.98043	3.86196
IIASA GDP	SSP5	BRB	GDP|PPP	billion US$2005/yr	6.52751	5.87952	5.43772	5.25014	5.47472	6.01236	6.74678	7.56433	8.36176	9.13762	9.93587	10.7847	11.679	12.5887	13.4512	14.2246	14.8606	15.3119	15.5514
OECD Env-Growth	SSP1	BRB	GDP|PPP	billion US$2005/yr	4.804	5.074	5.608	6.152	6.834	7.613	8.399	9.174	9.865	10.438	10.888	11.256	11.585	11.798	11.936	11.988	11.967	11.87	11.683
OECD Env-Growth	SSP2	BRB	GDP|PPP	billion US$2005/yr	4.804	5.081	5.616	6.115	6.623	7.127	7.638	8.169	8.681	9.177	9.651	10.127	10.636	11.119	11.592	12.036	12.462	12.876	13.277
OECD Env-Growth	SSP3	BRB	GDP|PPP	billion US$2005/yr	4.804	5.084	5.604	6.021	6.34	6.563	6.733	6.879	6.978	7.052	7.101	7.169	7.289	7.422	7.572	7.733	7.91	8.114	8.356
OECD Env-Growth	SSP4	BRB	GDP|PPP	billion US$2005/yr	4.804	5.067	5.582	6.115	6.743	7.396	7.986	8.517	8.947	9.29	9.543	9.738	9.919	10.024	10.102	10.137	10.144	10.141	10.127
OECD Env-Growth	SSP5	BRB	GDP|PPP	billion US$2005/yr	4.804	5.074	5.624	6.282	7.22	8.375	9.587	10.835	12.034	13.141	14.142	15.076	15.99	16.78	17.488	18.095	18.611	19.02	19.289
IIASA GDP	SSP1	BRN	GDP|PPP	billion US$2005/yr	17.9286	16.2168	13.1626	11.0216	10.1127	10.1013	10.7054	11.716	13.3071	15.3149	17.4122	19.2879	20.9366	22.4098	23.7	24.7891	25.6788	26.3451	26.7767
IIASA GDP	SSP2	BRN	GDP|PPP	billion US$2005/yr	17.9286	16.2812	13.3104	11.2307	10.3975	10.482	11.2203	12.4292	13.9276	15.9509	18.3643	20.8776	23.1769	25.2711	27.2426	29.155	31.0164	32.8309	34.5828
IIASA GDP	SSP3	BRN	GDP|PPP	billion US$2005/yr	17.9286	16.2336	13.1035	10.7589	9.61795	9.33763	9.6403	10.3385	11.3081	12.5082	13.8853	15.3203	16.6818	17.9194	19.0733	20.2143	21.4017	22.6542	23.9856
IIASA GDP	SSP4	BRN	GDP|PPP	billion US$2005/yr	17.9286	16.1607	12.8812	10.3733	9.04759	8.55294	8.60093	8.9864	9.56279	10.2518	10.9805	11.6308	12.0992	12.3512	12.4376	12.4124	12.3264	12.2044	12.042
IIASA GDP	SSP5	BRN	GDP|PPP	billion US$2005/yr	17.9286	16.2478	13.3153	11.38	10.7444	11.0744	12.1198	13.6934	15.9872	18.8242	22.0388	25.4096	28.8621	32.2948	35.5746	38.6124	41.3448	43.6805	45.5725
OECD Env-Growth	SSP1	BRN	GDP|PPP	billion US$2005/yr	18.153	20.759	24.275	27.904	31.801	35.814	39.663	43.171	46.38	49.243	51.776	53.833	55.262	56.069	56.479	56.55	56.326	55.777	54.836
OECD Env-Growth	SSP2	BRN	GDP|PPP	billion US$2005/yr	18.153	20.964	24.759	28.476	32.244	36.206	40.311	44.543	49.007	53.68	58.544	63.259	67.612	71.525	75.031	78.062	80.616	82.735	84.472
OECD Env-Growth	SSP3	BRN	GDP|PPP	billion US$2005/yr	18.153	20.882	24.403	27.334	29.785	32.053	34.165	36.136	38.153	40.27	42.511	44.766	46.901	48.933	50.903	52.811	54.672	56.459	58.194
OECD Env-Growth	SSP4	BRN	GDP|PPP	billion US$2005/yr	18.153	20.749	24.211	27.542	30.856	33.961	36.688	39.043	41.213	43.248	45.169	46.819	48.072	48.945	49.605	50.061	50.356	50.498	50.44
OECD Env-Growth	SSP5	BRN	GDP|PPP	billion US$2005/yr	18.153	20.783	24.453	28.749	33.717	39.176	44.736	50.288	55.842	61.304	66.67	71.709	76.164	79.946	83.25	86.185	88.668	90.629	91.985
IIASA GDP	SSP1	BTN	GDP|PPP	billion US$2005/yr	3.15497	5.11538	7.82152	10.7506	13.4953	16.1159	19.0842	22.5681	26.613	31.1157	35.7853	40.3076	44.6668	48.8478	52.7858	56.3379	59.4048	61.9174	63.7947
IIASA GDP	SSP2	BTN	GDP|PPP	billion US$2005/yr	3.15497	5.10524	7.72755	10.9246	14.1163	16.837	19.417	22.3548	26.0308	30.5142	35.6369	41.0524	46.4063	51.636	56.7339	61.6839	66.4128	70.8885	75.0876
IIASA GDP	SSP3	BTN	GDP|PPP	billion US$2005/yr	3.15497	5.0714	7.50164	10.2003	12.5372	14.3585	15.9019	17.4252	19.109	21.2372	23.7854	26.6408	29.5758	32.503	35.3485	38.1491	41.0075	44.0127	47.2069
IIASA GDP	SSP4	BTN	GDP|PPP	billion US$2005/yr	3.15497	5.03033	7.3753	9.92174	12.0204	13.5015	14.5679	15.5951	16.7677	18.1116	19.4764	20.7234	21.775	22.5989	23.1922	23.5737	23.7811	23.8433	23.7785
IIASA GDP	SSP5	BTN	GDP|PPP	billion US$2005/yr	3.15497	5.13665	7.97098	11.2402	14.5809	18.0428	22.1423	27.0961	32.9765	39.6515	47.0296	55.1239	63.8695	72.9722	82.0349	90.6969	98.7014	105.85	111.914
OECD Env-Growth	SSP1	BTN	GDP|PPP	billion US$2005/yr	3.47	5.645	9.745	14.778	21.123	28.792	37.479	46.937	56.626	66.24	75.636	84.54	92.511	99.32	104.872	109.138	112.318	114.53	115.549
OECD Env-Growth	SSP2	BTN	GDP|PPP	billion US$2005/yr	3.47	5.681	9.804	14.499	19.99	26.334	33.684	41.993	51.041	60.664	70.894	81.584	92.385	102.97	112.93	122.152	130.693	138.565	145.66
OECD Env-Growth	SSP3	BTN	GDP|PPP	billion US$2005/yr	3.47	5.681	9.7	13.736	17.833	21.934	26.213	30.605	34.97	39.281	43.739	48.378	53.105	57.848	62.434	66.89	71.317	75.748	80.152
OECD Env-Growth	SSP4	BTN	GDP|PPP	billion US$2005/yr	3.47	5.647	9.671	14.048	18.967	24.3	29.979	35.841	41.576	47.06	52.486	57.702	62.432	66.538	69.917	72.57	74.66	76.269	77.316
OECD Env-Growth	SSP5	BTN	GDP|PPP	billion US$2005/yr	3.47	5.668	9.959	15.729	23.578	33.642	45.549	59.091	73.73	89.102	105.035	121.103	136.623	151.105	164.209	175.884	186.28	195.443	202.818
IIASA GDP	SSP1	BWA	GDP|PPP	billion US$2005/yr	17.6554	21.3438	26.9088	35.5379	45.904	57.1822	68.2615	78.6557	88.1672	97.2319	106.158	114.904	123.291	131.093	138.168	144.448	149.936	154.606	158.406
IIASA GDP	SSP2	BWA	GDP|PPP	billion US$2005/yr	17.6554	21.4902	27.0731	34.9167	43.8599	53.615	63.7089	73.8685	83.9235	94.0155	104.46	115.215	125.954	136.267	145.972	154.856	162.832	169.817	175.634
IIASA GDP	SSP3	BWA	GDP|PPP	billion US$2005/yr	17.6554	21.3131	26.1736	32.2975	38.4732	44.475	50.1837	55.5694	60.5114	64.8294	69.1757	73.8342	78.5133	83.1081	87.8162	92.7927	98.0471	103.53	109.203
IIASA GDP	SSP4	BWA	GDP|PPP	billion US$2005/yr	17.6554	21.3084	26.092	31.8635	37.3149	42.2935	46.758	50.4018	53.2049	55.3875	57.2336	58.7855	59.9982	60.787	61.1447	61.1429	60.8481	60.2678	59.3727
IIASA GDP	SSP5	BWA	GDP|PPP	billion US$2005/yr	17.6554	21.3976	27.2669	36.7981	48.9339	63.0014	77.8562	92.9683	108.434	124.719	142.105	160.259	178.759	197.083	214.832	231.699	247.513	262.068	275.122
OECD Env-Growth	SSP1	BWA	GDP|PPP	billion US$2005/yr	25.012	30.877	38.707	47.195	56.86	67.517	78.903	90.491	101.945	113.06	123.788	133.693	142.268	149.115	154.457	158.3	160.988	162.633	163.043
OECD Env-Growth	SSP2	BWA	GDP|PPP	billion US$2005/yr	25.012	31.094	38.869	46.623	54.411	62.146	70.468	79.284	88.597	98.459	109.026	119.835	130.565	140.889	150.776	160.073	168.651	176.248	182.595
OECD Env-Growth	SSP3	BWA	GDP|PPP	billion US$2005/yr	25.012	30.792	37.733	43.778	48.685	52.584	56.218	59.541	62.604	65.312	68.053	70.886	73.624	76.404	79.299	82.228	85.202	88.258	91.346
OECD Env-Growth	SSP4	BWA	GDP|PPP	billion US$2005/yr	25.012	30.748	37.819	44.648	51.436	57.773	64.002	69.924	75.501	80.777	85.854	90.516	94.591	97.964	100.81	103.048	104.695	105.757	106.128
OECD Env-Growth	SSP5	BWA	GDP|PPP	billion US$2005/yr	25.012	30.932	39.037	48.737	60.995	75.527	91.768	109.243	127.623	146.68	166.381	186.011	204.762	221.829	237.165	250.738	262.904	273.711	282.655
IIASA GDP	SSP1	CAF	GDP|PPP	billion US$2005/yr	3.06907	3.63102	4.82546	6.33729	8.32678	10.9242	14.2919	18.5556	23.8975	30.3848	38.0828	46.8811	56.57	66.8034	77.3538	89.5752	102.919	116.222	128.072
IIASA GDP	SSP2	CAF	GDP|PPP	billion US$2005/yr	3.06907	3.46788	4.29287	5.19925	6.32805	7.68908	9.32443	11.2717	13.5776	16.3209	19.6082	23.5194	28.1344	33.5289	39.7807	46.945	55.0488	64.1142	74.1212
IIASA GDP	SSP3	CAF	GDP|PPP	billion US$2005/yr	3.06907	3.2998	3.76148	4.13849	4.57389	5.03128	5.49569	5.9603	6.42307	6.90378	7.42649	7.98955	8.57963	9.18309	9.78329	10.3804	10.9818	11.598	12.2405
IIASA GDP	SSP4	CAF	GDP|PPP	billion US$2005/yr	3.06907	3.29754	3.77998	4.22252	4.79774	5.4817	6.2726	7.16901	8.17746	9.33092	10.6763	12.2213	13.953	15.8539	17.9003	20.0966	22.4625	25.0281	27.8288
IIASA GDP	SSP5	CAF	GDP|PPP	billion US$2005/yr	3.06907	3.63612	4.89079	6.59846	9.03019	12.4471	17.1781	23.5396	31.9408	42.6605	55.9721	71.8427	89.9801	109.766	130.699	155.011	181.798	208.955	236.469
OECD Env-Growth	SSP1	CAF	GDP|PPP	billion US$2005/yr	3.114	3.811	4.983	6.847	9.86	14.601	21.613	31.519	44.885	62.134	83.485	108.793	137.667	169.452	203.713	239.504	275.889	312.175	347.344
OECD Env-Growth	SSP2	CAF	GDP|PPP	billion US$2005/yr	3.114	3.851	5.052	6.696	8.856	11.633	15.355	20.284	26.702	34.927	45.283	58.059	73.573	92.102	113.899	139.193	168.114	200.814	237.333
OECD Env-Growth	SSP3	CAF	GDP|PPP	billion US$2005/yr	3.114	3.869	5.063	6.412	7.832	9.273	10.948	12.906	15.184	17.807	20.81	24.231	28.118	32.479	37.261	42.48	48.126	54.221	60.789
OECD Env-Growth	SSP4	CAF	GDP|PPP	billion US$2005/yr	3.114	3.87	5.056	6.331	7.579	8.653	9.788	11.004	12.312	13.704	15.185	16.758	18.437	20.211	22.039	23.933	25.897	27.957	30.146
OECD Env-Growth	SSP5	CAF	GDP|PPP	billion US$2005/yr	3.114	3.811	5.007	7.123	10.971	17.604	27.84	42.767	63.406	90.602	124.943	166.524	215.108	270.05	331.056	396.997	466.675	539.204	613.022
IIASA GDP	SSP1	CAN	GDP|PPP	billion US$2005/yr	1213.42	1370.76	1559.35	1809.43	2081.95	2364.81	2649.21	2932.8	3214.9	3503.29	3805.86	4120.01	4434.85	4742.33	5037.23	5310.79	5555.63	5771.79	5967.73
IIASA GDP	SSP2	CAN	GDP|PPP	billion US$2005/yr	1213.42	1373.67	1562.86	1803.95	2054.17	2302.64	2544.97	2781.82	3014.66	3250.91	3497.82	3753.15	4009.62	4260.2	4500.43	4727.88	4941.9	5139.74	5319.24
IIASA GDP	SSP3	CAN	GDP|PPP	billion US$2005/yr	1213.42	1304.49	1360.55	1419.14	1475.74	1532.68	1591.12	1649.19	1703.95	1756.28	1807.71	1857.05	1902.52	1940.66	1968.87	1986.41	1994.89	1996.18	1990.73
IIASA GDP	SSP4	CAN	GDP|PPP	billion US$2005/yr	1213.42	1381.93	1584.27	1835.78	2080.71	2307.44	2519.65	2724.21	2922.5	3118.33	3314.72	3507.17	3691.38	3861.78	4012.34	4136.86	4232.9	4297.79	4332.44
IIASA GDP	SSP5	CAN	GDP|PPP	billion US$2005/yr	1213.42	1378.75	1597.27	1916.05	2306.24	2757.05	3257.78	3806.94	4404.87	5064.34	5803.58	6626.27	7517.09	8462.23	9453.88	10481.7	11535.6	12614.2	13726.2
OECD Env-Growth	SSP1	CAN	GDP|PPP	billion US$2005/yr	1201.89	1355.37	1537.67	1689.67	1845.41	2031.12	2237.86	2457.28	2679.58	2907.51	3156.57	3432.19	3722.7	4012.47	4300.72	4573.91	4831.52	5078.94	5318.19
OECD Env-Growth	SSP2	CAN	GDP|PPP	billion US$2005/yr	1201.89	1353.75	1531.72	1694.12	1861.57	2046.67	2245.51	2448.01	2647.38	2848.4	3067.69	3311.85	3575.44	3846.63	4123.55	4399.11	4674.88	4953.77	5236.01
OECD Env-Growth	SSP3	CAN	GDP|PPP	billion US$2005/yr	1201.89	1340.32	1488.5	1602.14	1715.26	1851.03	2004.31	2152.7	2277.35	2376.84	2464.64	2548.18	2620.58	2673.92	2713.57	2739.62	2758.57	2775.28	2785.51
OECD Env-Growth	SSP4	CAN	GDP|PPP	billion US$2005/yr	1201.89	1350.29	1521.65	1675.35	1845.62	2048.81	2263.13	2474.46	2674.92	2870.1	3079.41	3306.59	3540.53	3764.79	3981.93	4183.02	4370.38	4544.9	4699
OECD Env-Growth	SSP5	CAN	GDP|PPP	billion US$2005/yr	1201.89	1366.99	1576.15	1807.11	2114.06	2526.66	3021.34	3581.18	4185.78	4837.19	5563.31	6382.77	7299.9	8305.91	9393.26	10547.9	11771.5	13079.5	14493.9
IIASA GDP	SSP1	CHE	GDP|PPP	billion US$2005/yr	301.364	325.403	347.763	372.911	403.115	438.022	476.807	518.457	561.488	605.328	649.942	693.843	735.551	774.776	812.146	848.046	881.888	913.782	944.234
IIASA GDP	SSP2	CHE	GDP|PPP	billion US$2005/yr	301.364	326.414	349.453	373.743	401.36	432.298	466.243	502.481	539.791	577.402	615.146	652.355	688.589	723.91	758.837	793.257	825.937	856.154	883.992
IIASA GDP	SSP3	CHE	GDP|PPP	billion US$2005/yr	301.364	325.906	346.359	364.442	382.003	399.702	417.883	436.077	453.258	468.941	482.91	495.204	506.435	516.827	526.335	534.599	541.515	547.084	551.326
IIASA GDP	SSP4	CHE	GDP|PPP	billion US$2005/yr	301.364	327.173	351.021	375.298	401.164	429.065	459.372	491.771	525.15	558.783	591.942	623.54	653.221	680.77	706.41	729.857	749.919	765.649	776.969
IIASA GDP	SSP5	CHE	GDP|PPP	billion US$2005/yr	301.364	326.875	354.158	389.522	436.283	494.53	563.662	643.185	731.937	829.702	937.097	1052.87	1174.83	1302.36	1436.08	1576.59	1723.4	1877.34	2040.02
OECD Env-Growth	SSP1	CHE	GDP|PPP	billion US$2005/yr	294.115	322.868	358.279	395.329	435.502	480.062	529.457	581.862	634.462	687.146	740.681	794.588	847.373	897.581	944.977	988.718	1029.18	1066.83	1102.08
OECD Env-Growth	SSP2	CHE	GDP|PPP	billion US$2005/yr	294.115	322.506	356.387	388.234	419.135	452.2	491.907	537.203	586.001	637.56	691.927	748.847	807.271	865.728	924.234	982.016	1037.93	1091.9	1144.65
OECD Env-Growth	SSP3	CHE	GDP|PPP	billion US$2005/yr	294.115	320.151	348.218	370.548	386.494	399.323	413.825	428.91	442.556	454.163	464.101	473.116	480.126	484.005	485.634	484.602	481.804	477.839	472.25
OECD Env-Growth	SSP4	CHE	GDP|PPP	billion US$2005/yr	294.115	321.815	355.297	390.883	428.867	470.188	515.096	562.233	609.259	655.595	702.14	748.548	793.041	834.037	872.679	907.834	939.586	968.12	992.519
OECD Env-Growth	SSP5	CHE	GDP|PPP	billion US$2005/yr	294.115	324.774	364.912	414.934	476.996	551.253	636.801	734.084	841.742	960.931	1094.04	1240.77	1401.04	1574.07	1757.89	1951.05	2154.04	2368.07	2596.49
IIASA GDP	SSP1	CHL	GDP|PPP	billion US$2005/yr	199.333	239.039	275.743	319.894	369.357	420.434	470.521	516.499	555.373	585.662	609.834	631.803	653.84	675.638	695.665	712.552	723.011	724.448	717.291
IIASA GDP	SSP2	CHL	GDP|PPP	billion US$2005/yr	199.333	239.564	271.746	309.517	352.335	398.908	446.45	492.621	534.709	571.525	603.139	629.831	654.814	680.347	707.013	733.806	759.401	782.822	803.865
IIASA GDP	SSP3	CHL	GDP|PPP	billion US$2005/yr	199.333	239.262	268.305	295.139	320.352	350.51	384.756	419.838	451.483	478.693	502.189	523.642	544.644	566.567	589.978	614.995	641.571	670.024	700.777
IIASA GDP	SSP4	CHL	GDP|PPP	billion US$2005/yr	199.333	237.599	263.109	284.223	301.4	322.14	345.71	368.611	386.173	397.772	404.465	407.986	409.629	409.756	408.037	404.089	397.518	388.315	376.859
IIASA GDP	SSP5	CHL	GDP|PPP	billion US$2005/yr	199.333	239.387	278.41	328.503	388.604	454.885	523.823	590.796	652.059	711.857	774.779	842.627	913.987	986.173	1056.24	1121.7	1176.88	1216.56	1240.06
OECD Env-Growth	SSP1	CHL	GDP|PPP	billion US$2005/yr	232.988	294.581	365.612	443.298	529.693	623.966	721.861	818.244	904.435	979.184	1045.72	1106.19	1157.03	1195.23	1223.76	1242.31	1250.62	1248.95	1237.19
OECD Env-Growth	SSP2	CHL	GDP|PPP	billion US$2005/yr	232.988	295.595	367.453	439.623	510.276	580.255	654.17	732.004	809.537	885.78	963.353	1043.48	1124.13	1203.29	1281.25	1357.08	1430.86	1503.49	1574.9
OECD Env-Growth	SSP3	CHL	GDP|PPP	billion US$2005/yr	232.988	296.528	368.699	432.532	484.762	526.409	565.829	604.225	639.345	672.183	706.611	744.432	785.094	827.886	871.447	915.206	960.598	1008.86	1061.27
OECD Env-Growth	SSP4	CHL	GDP|PPP	billion US$2005/yr	232.988	294.895	364.611	431.526	496.618	558.763	621.23	683.489	741.522	795.001	847.208	897.636	943.751	983.751	1018.73	1048.15	1073.55	1096.41	1115.48
OECD Env-Growth	SSP5	CHL	GDP|PPP	billion US$2005/yr	232.988	294.681	366.954	453.912	560.695	685.276	818.606	955.826	1087.21	1211.38	1332.3	1451.96	1565.08	1666.87	1760.43	1844.53	1917.64	1978.78	2026.04
IIASA GDP	SSP1	CHN	GDP|PPP	billion US$2005/yr	9110.6	16343	24276.4	32097.9	38778.2	43998.8	47760.3	50627	52733.6	54204.1	55048.5	55359	55226.9	54709.3	53848.5	52686.3	51166.2	49171.2	46819.9
IIASA GDP	SSP2	CHN	GDP|PPP	billion US$2005/yr	9110.6	16349.7	24144.3	31591.4	37776.2	42598.1	46041.8	48614.6	50420.1	51581.6	52144.9	52266.5	52082.2	51684.1	51107.1	50378.4	49548.8	48683.3	47857.7
IIASA GDP	SSP3	CHN	GDP|PPP	billion US$2005/yr	9110.6	16351.2	24047.7	30640	35895.5	40009.5	43047.4	45143.9	46402.1	46994.5	47035	46748.6	46318.7	45896.8	45567.5	45396.2	45434.2	45715.1	46237.7
IIASA GDP	SSP4	CHN	GDP|PPP	billion US$2005/yr	9110.6	16275.5	23671.3	29599.6	33844.5	36747.6	38469.9	39108.9	38789.5	37796.5	36327.2	34623.1	32838	31030.3	29204.2	27374.6	25578	23852.8	22241.3
IIASA GDP	SSP5	CHN	GDP|PPP	billion US$2005/yr	9110.6	16362.3	24472	32823	40491.3	47094.1	52636.1	57622.5	62088	66038.6	69396.1	72182.5	74428.2	76130.2	77279	77877.3	77790.8	76786.3	74992
OECD Env-Growth	SSP1	CHN	GDP|PPP	billion US$2005/yr	9121.35	13852.4	20548.5	28870.3	38292.5	47784.2	56255.4	63353.9	68441.8	71441.8	73146	73727.1	73350.5	72049.6	70406.7	68308.3	65970.1	63440.4	60660.5
OECD Env-Growth	SSP2	CHN	GDP|PPP	billion US$2005/yr	9121.35	13882.1	20376.8	27245.2	33582.3	38906.9	43613	47745.9	50967.5	53257.4	55132.5	56609	57738.5	58448.3	58955.6	59167	59231.8	59221.4	59184.7
OECD Env-Growth	SSP3	CHN	GDP|PPP	billion US$2005/yr	9121.35	13904.5	20318.3	26409.5	31120.2	34103.1	36249.7	37748.4	38452.5	38528.7	38486.9	38367.3	38207.7	37964.3	37725	37439.2	37204.8	37051.8	37012.2
OECD Env-Growth	SSP4	CHN	GDP|PPP	billion US$2005/yr	9121.35	13843.8	20259.9	27080.1	33580.3	39109.6	43862.4	47805.4	50574.3	52173.5	53198.1	53598.2	53424.5	52645.7	51638.1	50322.5	48888.4	47421	45916.3
OECD Env-Growth	SSP5	CHN	GDP|PPP	billion US$2005/yr	9121.35	13850.9	20772.4	30489	42651.7	55602.5	67337.1	77429	85164.6	90540.3	94578.5	97442.4	99250.6	99965.8	100307	100055	99454	98525.1	97122.2
IIASA GDP	SSP1	CIV	GDP|PPP	billion US$2005/yr	27.7124	29.2683	33.7658	40.6227	50.852	65.5613	85.6274	111.747	143.958	181.066	223.459	270.467	321	372.63	423.322	471.363	515.7	555.778	591.451
IIASA GDP	SSP2	CIV	GDP|PPP	billion US$2005/yr	27.7124	28.6058	31.6873	36.1189	42.7903	52.2733	64.9666	81.3787	101.701	125.858	153.413	184.357	218.667	256.507	297.73	346.664	402.614	462.771	523.042
IIASA GDP	SSP3	CIV	GDP|PPP	billion US$2005/yr	27.7124	27.9432	29.514	31.4397	34.377	38.275	42.8828	48.0598	53.5728	59.4038	65.5217	71.9429	78.6058	85.5063	92.6229	99.9331	107.548	115.543	124.039
IIASA GDP	SSP4	CIV	GDP|PPP	billion US$2005/yr	27.7124	27.7696	29.2309	31.2129	34.5931	39.4264	45.6588	53.3113	62.309	72.7754	84.756	98.3277	113.439	130.149	148.518	168.657	190.893	215.491	242.786
IIASA GDP	SSP5	CIV	GDP|PPP	billion US$2005/yr	27.7124	29.2265	33.8467	41.2077	52.6939	69.8948	94.308	127.275	169.311	219.163	277.624	343.881	416.429	491.848	567.386	640.774	710.617	785.862	876.034
OECD Env-Growth	SSP1	CIV	GDP|PPP	billion US$2005/yr	33.443	41.008	59.253	94.175	149.694	229.08	332.45	458.868	604.593	767.184	942.174	1124.89	1308.75	1488.79	1665.31	1835.02	1993.68	2138.84	2266.79
OECD Env-Growth	SSP2	CIV	GDP|PPP	billion US$2005/yr	33.443	41.484	60.178	92.286	137.605	195.787	268.618	357.523	462.108	583.435	721.027	874.793	1043.69	1226.74	1423.44	1633.04	1853.95	2083.17	2318.36
OECD Env-Growth	SSP3	CIV	GDP|PPP	billion US$2005/yr	33.443	42.116	61.758	91.348	127.518	167.284	212.184	262.119	315.968	374.076	436.865	505.017	578.033	655.674	736.917	819.887	904.87	991.526	1080.16
OECD Env-Growth	SSP4	CIV	GDP|PPP	billion US$2005/yr	33.443	41.991	61.047	88.308	120.078	152.268	186.981	224.308	263.415	304.474	347.458	392.783	440.262	489.683	540.314	591.542	643.769	697.176	752.447
OECD Env-Growth	SSP5	CIV	GDP|PPP	billion US$2005/yr	33.443	40.87	59.013	96.092	159.201	253.582	377.198	528.871	704.742	903.389	1121.09	1355.14	1598.72	1848.2	2108.35	2376.56	2649.47	2925.33	3199.51
IIASA GDP	SSP1	CMR	GDP|PPP	billion US$2005/yr	34.118	42.4168	53.0371	68.7927	89.8382	116.69	149.496	188.351	233.543	284.644	340.789	406.735	480.978	558.623	632.666	699.573	758.102	808.314	850.676
IIASA GDP	SSP2	CMR	GDP|PPP	billion US$2005/yr	34.118	41.7434	50.3137	62.028	76.8012	94.776	115.832	140.161	168.17	200.215	236.366	276.91	321.67	370.19	422.269	486.807	562.561	644.767	725.799
IIASA GDP	SSP3	CMR	GDP|PPP	billion US$2005/yr	34.118	40.7118	46.6181	53.6773	61.6284	70.1092	78.4975	86.6844	94.6674	102.686	110.828	119.123	127.615	136.16	144.806	153.652	162.909	172.71	183.001
IIASA GDP	SSP4	CMR	GDP|PPP	billion US$2005/yr	34.118	40.646	46.6066	53.9943	62.8569	73.0383	84.1597	96.2061	109.268	123.698	139.691	157.228	176.274	196.568	218.168	241.26	266.247	293.455	322.896
IIASA GDP	SSP5	CMR	GDP|PPP	billion US$2005/yr	34.118	42.4636	53.6152	71.0742	95.9366	129.725	173.578	228.444	295.345	374.263	464.402	572.484	696.648	829.497	959.749	1085.92	1219.69	1371.09	1543.7
OECD Env-Growth	SSP1	CMR	GDP|PPP	billion US$2005/yr	40.336	50.073	65.024	88.458	124.026	175.188	243.868	331.538	438.814	566.081	712.204	874.014	1045.07	1218.95	1395.04	1569.15	1737.05	1895.39	2039.17
OECD Env-Growth	SSP2	CMR	GDP|PPP	billion US$2005/yr	40.336	50.623	65.952	87.462	115.837	151.332	196.115	251.22	318.234	398.882	494.297	605.025	730.477	870.231	1024.75	1193.71	1376.36	1571.04	1775.34
OECD Env-Growth	SSP3	CMR	GDP|PPP	billion US$2005/yr	40.336	51.038	66.819	85.975	107.899	131.442	158.263	188.24	221.564	258.638	299.635	344.534	393.264	445.008	499.589	556.805	616.837	680.006	745.745
OECD Env-Growth	SSP4	CMR	GDP|PPP	billion US$2005/yr	40.336	51.048	66.697	84.735	104.808	124.708	146.464	169.937	195.309	222.784	252.282	283.503	316.389	350.227	384.882	420.429	457.097	495.332	535.02
OECD Env-Growth	SSP5	CMR	GDP|PPP	billion US$2005/yr	40.336	50.063	65.158	90.797	133.481	199.368	290.844	411.21	562.779	747.921	967.329	1218.9	1495.46	1789.6	2102.1	2428.15	2762.3	3099.76	3432.1
IIASA GDP	SSP1	COD	GDP|PPP	billion US$2005/yr	15.962	32.2284	70.7707	155.874	294.35	479.908	695.929	933.061	1191.57	1475.48	1785.86	2119.11	2468.99	2825.16	3177.3	3516.94	3839.07	4140.03	4417.32
IIASA GDP	SSP2	COD	GDP|PPP	billion US$2005/yr	15.962	31.9568	67.6265	141.315	252.936	394.657	554.339	725.752	909.143	1104.97	1319.84	1561.43	1835.54	2142.94	2482.19	2847.04	3231.07	3627.07	4028.09
IIASA GDP	SSP3	COD	GDP|PPP	billion US$2005/yr	15.962	31.495	63.678	124.537	206.924	299.209	388.673	469.724	540.914	606.29	669.048	731.697	794.872	858.935	922.995	987.436	1053.22	1121.28	1192.47
IIASA GDP	SSP4	COD	GDP|PPP	billion US$2005/yr	15.962	31.4224	63.5501	124.796	209.463	307.903	409.765	511.037	610.991	714.17	824.375	944.36	1074.64	1215.49	1365.62	1525.6	1696.95	1881.19	2079.78
IIASA GDP	SSP5	COD	GDP|PPP	billion US$2005/yr	15.962	32.2663	71.5658	161.174	314.761	534.536	810.066	1135.21	1512.4	1947.99	2444.65	2997.45	3595.61	4220.71	4853.38	5529.22	6299.74	7200.62	8235.89
OECD Env-Growth	SSP1	COD	GDP|PPP	billion US$2005/yr	20.876	29.356	44.117	76.517	136.034	237.933	398.47	636.284	966.031	1399.53	1944.8	2601.05	3358.77	4201.62	5110.63	6062.65	7033.32	8003.54	8947.87
OECD Env-Growth	SSP2	COD	GDP|PPP	billion US$2005/yr	20.876	29.611	44.539	73.21	116.725	177.572	263.901	384.52	547.687	762.241	1037.64	1383.77	1810.73	2325.04	2929.01	3620.53	4401.13	5270.34	6224.72
OECD Env-Growth	SSP3	COD	GDP|PPP	billion US$2005/yr	20.876	30.027	45.221	71.533	106.192	146.761	196.864	258.639	332.91	420.677	523.064	641.486	777.226	930.554	1100.36	1286.31	1488.86	1708.16	1945.3
OECD Env-Growth	SSP4	COD	GDP|PPP	billion US$2005/yr	20.876	30.02	45.037	69.929	101.024	133.605	170.664	213.108	260.575	312.775	369.483	430.652	496.41	566.292	639.273	715.337	794.91	878.563	967.542
OECD Env-Growth	SSP5	COD	GDP|PPP	billion US$2005/yr	20.876	29.352	44.445	80.661	154.943	294.027	522.261	869.162	1359.73	2016.43	2858.43	3894.02	5119.51	6522.42	8086.73	9788.56	11600.2	13499.8	15452
IIASA GDP	SSP1	COG	GDP|PPP	billion US$2005/yr	8.92123	12.3854	19.0428	29.5422	42.3249	56.0435	69.8677	84.0254	99.1565	115.432	132.669	152.268	173.523	194.8	214.122	230.668	245.118	259.284	274.176
IIASA GDP	SSP2	COG	GDP|PPP	billion US$2005/yr	8.92123	12.234	18.2109	27.0375	37.1024	47.3833	57.4626	67.8109	79.0595	91.5524	105.348	120.286	136.203	152.844	170.147	191.16	215.203	240.444	264.292
IIASA GDP	SSP3	COG	GDP|PPP	billion US$2005/yr	8.92123	11.9914	17.0711	23.9207	30.8989	37.1377	42.3611	47.0377	51.5234	56.1144	60.9395	65.9278	71.036	76.1465	81.2976	86.4991	91.823	97.2533	102.835
IIASA GDP	SSP4	COG	GDP|PPP	billion US$2005/yr	8.92123	11.9812	17.1219	24.22	31.7642	38.8938	45.3197	51.5202	57.9128	64.8781	72.6408	81.0925	90.101	99.4219	109.055	118.983	129.294	139.962	151.044
IIASA GDP	SSP5	COG	GDP|PPP	billion US$2005/yr	8.92123	12.4221	19.3534	30.8191	45.7701	63.1019	81.9513	102.512	125.493	151.123	179.2	211.577	247.246	284.733	324.55	368.149	416.151	467.626	521.059
OECD Env-Growth	SSP1	COG	GDP|PPP	billion US$2005/yr	15.396	22.455	30.143	41.757	57.555	78.402	104.378	135.388	171.163	211.247	254.827	300.218	345.604	389.452	432.079	472.376	509.438	542.589	570.883
OECD Env-Growth	SSP2	COG	GDP|PPP	billion US$2005/yr	15.396	22.683	30.3	40.66	53.2	68.004	85.623	106.258	130.342	158.227	190.062	225.514	264.357	306.32	351.353	399.105	449.147	500.69	552.961
OECD Env-Growth	SSP3	COG	GDP|PPP	billion US$2005/yr	15.396	22.786	30.27	39.32	49.145	59.442	70.808	83.269	96.924	111.845	128.04	145.31	163.692	182.839	202.64	222.89	243.57	264.625	286.106
OECD Env-Growth	SSP4	COG	GDP|PPP	billion US$2005/yr	15.396	22.842	30.407	39.248	48.806	58.362	68.695	79.862	91.994	105.147	119.304	134.18	149.82	165.893	182.289	198.837	215.529	232.372	249.492
OECD Env-Growth	SSP5	COG	GDP|PPP	billion US$2005/yr	15.396	22.503	30.415	43.244	62.333	89.334	124.366	167.8	219.783	280.253	348.71	423.274	501.644	581.676	663.67	746.091	827.433	906.445	981.151
IIASA GDP	SSP1	COL	GDP|PPP	billion US$2005/yr	328.786	428.566	517.303	612.699	714.225	819.804	954.077	1114.66	1285.79	1440.99	1567.37	1662.6	1732.39	1793.1	1857.67	1928.49	1998.42	2059.62	2106.77
IIASA GDP	SSP2	COL	GDP|PPP	billion US$2005/yr	328.786	427.796	509.794	593.605	682.356	778.181	883.973	1017.47	1172.66	1336.09	1490.4	1628.35	1748.26	1852.16	1941.12	2017.5	2092.9	2174.64	2264.06
IIASA GDP	SSP3	COL	GDP|PPP	billion US$2005/yr	328.786	426.35	499.804	565.542	629.293	696.69	772.016	857.906	948.958	1037.75	1120.21	1198.05	1273.99	1349.35	1424.39	1499.33	1575.92	1655.59	1740.07
IIASA GDP	SSP4	COL	GDP|PPP	billion US$2005/yr	328.786	422.685	488.042	540.52	585.718	630.035	678.647	733.951	790.852	840.927	879.568	907.282	926.518	939.005	947.131	951.113	951.31	948.329	941.847
IIASA GDP	SSP5	COL	GDP|PPP	billion US$2005/yr	328.786	428.971	521.605	627.676	749.004	883.633	1058.15	1270.52	1502.51	1721.81	1913.19	2097.25	2295.73	2518.64	2761.86	3014.66	3261.7	3489.63	3689.21
OECD Env-Growth	SSP1	COL	GDP|PPP	billion US$2005/yr	392.55	491.259	599.464	712.581	871.298	1072.84	1304.33	1554.12	1813.79	2078.49	2342.19	2599.43	2841.6	3061.68	3265.46	3447.53	3600.19	3721.15	3805.96
OECD Env-Growth	SSP2	COL	GDP|PPP	billion US$2005/yr	392.55	493.714	605.146	707.202	829.777	967.583	1123.59	1295.19	1482.47	1685.71	1904.21	2138.34	2385.88	2643.01	2909.49	3181.16	3455.24	3730.2	4003.75
OECD Env-Growth	SSP3	COL	GDP|PPP	billion US$2005/yr	392.55	496.817	612.902	706.791	801.137	888.441	978.445	1069.21	1162.19	1260.49	1365.88	1480.8	1605.79	1740.5	1883.58	2033.29	2190.82	2356.45	2531.22
OECD Env-Growth	SSP4	COL	GDP|PPP	billion US$2005/yr	392.55	492.377	600.576	694.683	807.242	930.891	1065.69	1206.45	1353	1506.16	1664.59	1824.58	1981.83	2132.41	2277.79	2414.58	2542.88	2662.79	2771.02
OECD Env-Growth	SSP5	COL	GDP|PPP	billion US$2005/yr	392.55	491.036	600.653	730.201	927.214	1192.29	1503.98	1850.93	2224.53	2620.95	3034.72	3460.12	3885.63	4302.2	4718.32	5126.24	5513.36	5873.84	6197.11
IIASA GDP	SSP1	COM	GDP|PPP	billion US$2005/yr	0.687843	0.79624	1.00977	1.33181	1.75058	2.28152	2.97724	3.87803	5.00129	6.29234	7.64862	9.09864	10.6332	12.2175	13.771	15.2389	16.5834	17.7876	18.8609
IIASA GDP	SSP2	COM	GDP|PPP	billion US$2005/yr	0.687843	0.781032	0.942519	1.16795	1.439	1.76371	2.17737	2.71866	3.40498	4.24073	5.21221	6.30496	7.51635	8.85925	10.3639	12.2367	14.4602	16.9273	19.4585
IIASA GDP	SSP3	COM	GDP|PPP	billion US$2005/yr	0.687843	0.754092	0.844463	0.951352	1.05876	1.1657	1.28178	1.41868	1.5757	1.75566	1.95653	2.17461	2.40816	2.65735	2.92354	3.20736	3.51047	3.83473	4.181
IIASA GDP	SSP4	COM	GDP|PPP	billion US$2005/yr	0.687843	0.750609	0.839673	0.951688	1.07891	1.22296	1.39675	1.61601	1.88652	2.21848	2.61539	3.07737	3.6072	4.21128	4.89927	5.68083	6.5676	7.57252	8.70762
IIASA GDP	SSP5	COM	GDP|PPP	billion US$2005/yr	0.687843	0.795542	1.01494	1.36087	1.83907	2.48249	3.36567	4.55314	6.08532	7.90997	9.89933	12.1002	14.5001	17.0454	19.6104	22.1095	24.4787	26.7958	29.4609
OECD Env-Growth	SSP1	COM	GDP|PPP	billion US$2005/yr	0.723	0.822	1.016	1.419	2.096	3.133	4.582	6.502	8.944	11.971	15.551	19.56	23.801	28.134	32.652	37.337	42.02	46.515	50.658
OECD Env-Growth	SSP2	COM	GDP|PPP	billion US$2005/yr	0.723	0.837	1.038	1.397	1.92	2.613	3.53	4.719	6.249	8.208	10.654	13.62	17.114	21.167	25.86	31.257	37.346	44.07	51.353
OECD Env-Growth	SSP3	COM	GDP|PPP	billion US$2005/yr	0.723	0.849	1.054	1.356	1.734	2.17	2.692	3.319	4.083	5.005	6.096	7.367	8.834	10.512	12.412	14.547	16.921	19.539	22.399
OECD Env-Growth	SSP4	COM	GDP|PPP	billion US$2005/yr	0.723	0.847	1.045	1.324	1.661	2.012	2.403	2.844	3.353	3.937	4.593	5.322	6.128	7.013	7.983	9.041	10.19	11.436	12.784
OECD Env-Growth	SSP5	COM	GDP|PPP	billion US$2005/yr	0.723	0.82	1.012	1.445	2.244	3.568	5.477	8.057	11.379	15.536	20.499	26.147	32.247	38.644	45.533	52.959	60.762	68.727	76.62
IIASA GDP	SSP1	CPV	GDP|PPP	billion US$2005/yr	1.88902	2.52526	3.12512	3.55121	3.9364	4.35804	4.87768	5.47982	6.15827	6.85411	7.5162	8.14738	8.97832	9.91385	10.7785	11.3886	11.7118	11.8543	11.9385
IIASA GDP	SSP2	CPV	GDP|PPP	billion US$2005/yr	1.88902	2.49542	2.98932	3.25218	3.45449	3.68624	3.99883	4.38585	4.83488	5.31938	5.82444	6.37993	7.01351	7.72411	8.47414	9.23771	10.0116	11.0048	12.1676
IIASA GDP	SSP3	CPV	GDP|PPP	billion US$2005/yr	1.88902	2.49563	2.98208	3.22705	3.39987	3.58287	3.81082	4.06924	4.34323	4.60951	4.86261	5.12366	5.41116	5.72575	6.05049	6.37787	6.71932	7.09007	7.50298
IIASA GDP	SSP4	CPV	GDP|PPP	billion US$2005/yr	1.88902	2.46341	2.86781	2.98028	2.99109	3.00019	3.05451	3.14007	3.24136	3.33111	3.39892	3.45803	3.52038	3.58705	3.64919	3.70136	3.74765	3.7965	3.84874
IIASA GDP	SSP5	CPV	GDP|PPP	billion US$2005/yr	1.88902	2.51579	3.09652	3.49463	3.85677	4.2686	4.7951	5.415	6.11454	6.8248	7.47938	8.08015	8.88941	9.8121	10.7524	11.6488	12.5261	13.3922	14.2573
OECD Env-Growth	SSP1	CPV	GDP|PPP	billion US$2005/yr	1.723	2.124	2.666	3.386	4.326	5.501	6.855	8.325	9.821	11.282	12.672	14.032	15.332	16.547	17.684	18.741	19.71	20.594	21.37
OECD Env-Growth	SSP2	CPV	GDP|PPP	billion US$2005/yr	1.723	2.14	2.697	3.329	4.016	4.761	5.597	6.509	7.474	8.486	9.566	10.78	12.144	13.648	15.269	17.021	18.93	21.019	23.294
OECD Env-Growth	SSP3	CPV	GDP|PPP	billion US$2005/yr	1.723	2.164	2.774	3.435	4.082	4.715	5.388	6.088	6.795	7.51	8.259	9.088	10.014	11.025	12.092	13.215	14.418	15.724	17.148
OECD Env-Growth	SSP4	CPV	GDP|PPP	billion US$2005/yr	1.723	2.13	2.666	3.256	3.915	4.62	5.372	6.134	6.874	7.586	8.279	8.985	9.695	10.39	11.056	11.695	12.331	12.978	13.624
OECD Env-Growth	SSP5	CPV	GDP|PPP	billion US$2005/yr	1.723	2.109	2.62	3.354	4.388	5.72	7.215	8.78	10.311	11.745	13.044	14.298	15.481	16.607	17.767	18.943	20.16	21.459	22.847
IIASA GDP	SSP1	CRI	GDP|PPP	billion US$2005/yr	50.0179	62.72	73.2261	83.3034	93.8182	104.786	116.896	129.473	145.801	164.509	183.157	198.248	210.942	222.76	234.231	244.475	252.404	257.217	258.96
IIASA GDP	SSP2	CRI	GDP|PPP	billion US$2005/yr	50.0179	62.282	71.1019	79.0283	87.5951	97.0711	107.97	119.982	132.566	145.32	158.717	172.77	190.74	210.599	229.622	246.649	262.381	277.564	292.367
IIASA GDP	SSP3	CRI	GDP|PPP	billion US$2005/yr	50.0179	61.2525	67.4721	71.8171	76.3036	81.2149	86.7192	92.5439	98.0528	103.402	109.419	116.503	124.429	132.828	141.24	149.524	157.962	166.904	176.583
IIASA GDP	SSP4	CRI	GDP|PPP	billion US$2005/yr	50.0179	61.0333	66.7168	70.1796	73.3657	76.647	80.2732	83.9477	87.0288	89.4817	91.8922	94.3956	96.7175	98.5217	99.6208	99.8771	99.4523	98.6112	97.469
IIASA GDP	SSP5	CRI	GDP|PPP	billion US$2005/yr	50.0179	62.9116	74.3501	86.5934	100.664	116.434	134.437	153.75	177.981	205.698	235.473	266.193	298.464	332.248	366.225	398.421	426.716	449.383	465.972
OECD Env-Growth	SSP1	CRI	GDP|PPP	billion US$2005/yr	48.697	60.302	74.678	91.936	112.362	136.335	162.364	188.846	214.092	237.897	260.789	281.909	300.49	316.453	329.965	340.555	348.129	352.46	353.001
OECD Env-Growth	SSP2	CRI	GDP|PPP	billion US$2005/yr	48.697	60.654	75.296	90.948	107.08	124.166	142.716	162.239	182.401	203.413	226.071	249.886	274.537	299.73	324.818	349.411	373.207	396.067	418.042
OECD Env-Growth	SSP3	CRI	GDP|PPP	billion US$2005/yr	48.697	60.754	75.357	88.885	100.558	111.005	121.29	131.124	140.562	149.903	160.037	170.991	182.873	195.626	208.629	221.796	235.44	249.735	264.808
OECD Env-Growth	SSP4	CRI	GDP|PPP	billion US$2005/yr	48.697	60.509	74.798	89.219	103.93	118.914	134.207	149.027	163.181	176.772	190.541	203.78	216.084	227.317	237.234	245.604	252.871	259.237	264.446
OECD Env-Growth	SSP5	CRI	GDP|PPP	billion US$2005/yr	48.697	60.463	75.499	95.563	122.088	155.585	193.578	234.295	275.66	317.313	359.883	402.023	442.385	480.421	516.218	549.046	578.443	603.583	622.911
IIASA GDP	SSP1	CUB	GDP|PPP	billion US$2005/yr	127.96	158.977	190.191	216.366	238.598	256.316	270.202	280.194	286.17	289.305	290.355	289.925	287.686	284.125	279.545	275.46	270.687	263.181	253.034
IIASA GDP	SSP2	CUB	GDP|PPP	billion US$2005/yr	127.96	159.287	189.874	214.068	233.487	248.577	260.519	269.702	276.206	279.687	280.631	280.134	279.111	278.564	278.89	280.374	282.271	283.886	285.43
IIASA GDP	SSP3	CUB	GDP|PPP	billion US$2005/yr	127.96	159.342	189.09	211.702	229.081	241.929	251.44	258.349	263.572	267.347	269.959	272.256	275.362	280.5	288.126	298.123	310.065	323.851	339.691
IIASA GDP	SSP4	CUB	GDP|PPP	billion US$2005/yr	127.96	158.215	184.763	201.685	211.554	216.138	217.063	214.835	210.165	203.681	195.83	187.368	178.847	170.763	163.198	156.444	150.232	144.177	138.325
IIASA GDP	SSP5	CUB	GDP|PPP	billion US$2005/yr	127.96	158.894	190.446	217.82	242.602	264.158	282.814	297.875	310.802	322.258	332.124	340.044	345.219	348.111	349.066	350.339	350.482	346.799	339.413
OECD Env-Growth	SSP1	CUB	GDP|PPP	billion US$2005/yr	64.7	77.441	87.467	100.806	117.094	136.511	157.73	180.641	202.077	220.308	235.693	248.109	257.483	265.131	270.659	273.961	275.144	274.086	270.678
OECD Env-Growth	SSP2	CUB	GDP|PPP	billion US$2005/yr	64.7	76.263	85.199	94.947	104.175	113.32	123.751	135.989	148.217	159.494	170.332	180.967	191.552	202.97	214.619	226.17	237.777	249.652	262.121
OECD Env-Growth	SSP3	CUB	GDP|PPP	billion US$2005/yr	64.7	74.668	81.962	88.915	93.899	97.505	101.618	106.871	112.041	116.521	121.012	125.941	131.687	138.684	146.196	154.111	162.673	172.232	183.093
OECD Env-Growth	SSP4	CUB	GDP|PPP	billion US$2005/yr	64.7	74.698	82.119	90.18	98.291	106.687	116.146	127.221	138.194	147.953	156.93	164.929	171.915	178.719	184.908	190.287	195.04	199.449	203.454
OECD Env-Growth	SSP5	CUB	GDP|PPP	billion US$2005/yr	64.7	77.528	88.35	104.881	127.476	155.562	185.791	218.16	248.927	276.009	299.858	320.43	337.483	352.755	365.725	376.49	385.116	391.378	394.956
IIASA GDP	SSP1	CYP	GDP|PPP	billion US$2005/yr	20.6122	26.2656	33.9332	42.9987	51.4842	59.1117	66.1579	72.8526	79.26	85.5009	91.6308	97.4235	102.648	106.911	109.963	111.648	111.781	110.725	108.918
IIASA GDP	SSP2	CYP	GDP|PPP	billion US$2005/yr	20.6122	26.351	34.1226	43.2643	51.8311	59.5957	66.8858	73.9769	80.9299	87.8201	94.7147	101.418	107.662	113.247	118.142	122.426	126.258	129.845	133.269
IIASA GDP	SSP3	CYP	GDP|PPP	billion US$2005/yr	20.6122	25.614	31.5626	37.9117	43.3594	48.0799	52.5747	57.2163	62.0922	67.1839	72.4683	77.8616	83.3084	88.8931	94.7615	101.038	107.782	115.003	122.619
IIASA GDP	SSP4	CYP	GDP|PPP	billion US$2005/yr	20.6122	26.2003	33.3531	41.19	47.7256	52.956	57.3267	61.1545	64.4901	67.4611	70.2129	72.7261	74.9036	76.5958	77.7355	78.3384	78.4997	78.35	77.9395
IIASA GDP	SSP5	CYP	GDP|PPP	billion US$2005/yr	20.6122	26.3873	34.5918	44.9961	55.7236	66.3671	77.0761	88.034	99.2454	110.775	122.658	134.514	145.944	156.308	165.129	172.005	176.43	178.653	179.187
OECD Env-Growth	SSP1	CYP	GDP|PPP	billion US$2005/yr	20.867	20.848	22.876	25.378	28.751	32.888	37.453	42.124	46.612	51.127	55.785	60.479	64.894	68.588	71.531	73.681	75.116	75.994	76.251
OECD Env-Growth	SSP2	CYP	GDP|PPP	billion US$2005/yr	20.867	20.882	22.938	25.19	27.823	30.736	33.972	37.391	40.891	44.708	48.994	53.696	58.631	63.515	68.211	72.663	76.976	81.262	85.519
OECD Env-Growth	SSP3	CYP	GDP|PPP	billion US$2005/yr	20.867	20.793	22.661	24.291	25.87	27.334	28.827	30.279	31.679	33.241	35.096	37.287	39.759	42.361	44.95	47.518	50.166	52.985	55.989
OECD Env-Growth	SSP4	CYP	GDP|PPP	billion US$2005/yr	20.867	20.828	22.822	25.171	28.347	32.159	36.304	40.546	44.748	49.168	53.943	58.902	63.749	68.129	71.96	75.196	78.028	80.579	82.737
OECD Env-Growth	SSP5	CYP	GDP|PPP	billion US$2005/yr	20.867	20.977	23.267	26.587	31.568	38.154	45.777	54.079	62.657	71.705	81.393	91.546	101.691	111.074	119.554	127.087	133.681	139.451	144.107
IIASA GDP	SSP1	CZE	GDP|PPP	billion US$2005/yr	235.476	264.906	274.042	282.009	296.441	317.157	342.831	371.154	400.45	431.49	465.818	503.195	542.398	581.446	618.91	653.809	688.717	725.157	763.062
IIASA GDP	SSP2	CZE	GDP|PPP	billion US$2005/yr	235.476	265.624	274.523	280.131	290.12	305.091	324.763	347.679	371.549	396.167	422.255	449.348	476.415	502.877	528.805	554.36	580.575	608.034	636.525
IIASA GDP	SSP3	CZE	GDP|PPP	billion US$2005/yr	235.476	264.832	270.242	268.643	267.924	269.604	274.013	279.989	285.514	289.706	292.748	294.664	295.638	295.868	295.671	295.267	294.943	294.598	293.784
IIASA GDP	SSP4	CZE	GDP|PPP	billion US$2005/yr	235.476	265.774	274.069	277.687	283.899	293.816	307.663	324.271	341.467	358.652	376.076	393.173	409.26	423.645	436.074	446.465	455.878	464.913	473.559
IIASA GDP	SSP5	CZE	GDP|PPP	billion US$2005/yr	235.476	266.114	279.656	296.442	324.61	363.853	412.57	470.795	538.466	617.274	709.458	815.258	933.497	1062.22	1199.9	1345.44	1502.76	1675.02	1862.92
OECD Env-Growth	SSP1	CZE	GDP|PPP	billion US$2005/yr	248.639	286.048	339.277	400.893	473.026	550.978	627.052	694.867	761.578	826.048	892.753	965.874	1038.49	1103.31	1161.34	1214.02	1263.55	1311.93	1358.68
OECD Env-Growth	SSP2	CZE	GDP|PPP	billion US$2005/yr	248.639	285.611	336.695	391.508	452.352	516.929	582.1	643.228	707.387	771.963	839.997	914.824	990.328	1060.59	1127.32	1192.19	1256.18	1321	1387.07
OECD Env-Growth	SSP3	CZE	GDP|PPP	billion US$2005/yr	248.639	283.328	327.654	370.59	412.647	450.979	483.806	507.228	527.767	543.396	556.848	571.12	580.826	582.458	579.543	573.626	566.339	558.507	548.897
OECD Env-Growth	SSP4	CZE	GDP|PPP	billion US$2005/yr	248.639	284.914	335.542	394.668	463.155	535.661	604.628	664.889	724.362	780.957	838.372	899.493	956.73	1003.72	1044.06	1079.44	1111.93	1143.17	1171.67
OECD Env-Growth	SSP5	CZE	GDP|PPP	billion US$2005/yr	248.639	287.807	346.842	423.949	519.679	629.633	744.993	861.406	988.467	1126.31	1282.35	1463.61	1664.43	1876.22	2097.87	2330.32	2576.93	2842.68	3130.54
IIASA GDP	SSP1	DEU	GDP|PPP	billion US$2005/yr	2659.22	2687.31	2699.89	2746.51	2846.73	2997.74	3189.1	3410.88	3651.28	3902.37	4158.29	4413.47	4661.14	4899.74	5138.75	5368.25	5576.74	5760.12	5934.4
IIASA GDP	SSP2	DEU	GDP|PPP	billion US$2005/yr	2659.22	2686.96	2690.46	2716.8	2785.34	2894.02	3033.49	3195.39	3368.51	3545.68	3724.91	3904.67	4085.66	4268.54	4453.92	4635.91	4810.25	4975.6	5132.63
IIASA GDP	SSP3	DEU	GDP|PPP	billion US$2005/yr	2659.22	2672.91	2641.65	2609.86	2599.01	2611.45	2639.4	2674.27	2705.68	2729.95	2747.24	2760.29	2772.15	2780.95	2783.19	2776.44	2761.97	2741.13	2715.21
IIASA GDP	SSP4	DEU	GDP|PPP	billion US$2005/yr	2659.22	2692.87	2701.67	2725.77	2775.33	2850.37	2946.35	3058.78	3178	3297.48	3411.82	3516.43	3612.34	3699.47	3777.76	3841.21	3886.59	3912.5	3919.67
IIASA GDP	SSP5	DEU	GDP|PPP	billion US$2005/yr	2659.22	2695.93	2740.34	2851.99	3056.43	3352.08	3731.2	4188.23	4714.32	5304.92	5960.38	6677.71	7446.24	8261.83	9137.01	10062.5	11024.3	12018.6	13069
OECD Env-Growth	SSP1	DEU	GDP|PPP	billion US$2005/yr	2727.33	2990.49	3195.69	3394.9	3608.2	3869.57	4183.73	4492.94	4775.8	5044.27	5331.66	5617.21	5899.77	6167.4	6418.7	6639.45	6833.4	7008.22	7167.72
OECD Env-Growth	SSP2	DEU	GDP|PPP	billion US$2005/yr	2727.33	2984.88	3175.18	3337.97	3487.77	3668.52	3907.28	4154.09	4391.66	4629.78	4896.42	5169.75	5452.62	5734.97	6012.67	6279	6534.79	6784.66	7026.18
OECD Env-Growth	SSP3	DEU	GDP|PPP	billion US$2005/yr	2727.33	2967.93	3122.8	3214.72	3258.38	3296.92	3359.72	3397.74	3398.17	3376.83	3363.26	3342.76	3314.86	3272.21	3218.56	3151.86	3080.47	3007.93	2929.24
OECD Env-Growth	SSP4	DEU	GDP|PPP	billion US$2005/yr	2727.33	2979.06	3166.28	3351.17	3545.84	3779.05	4054.84	4318.43	4550.63	4763.64	4990.37	5205.6	5407.28	5584.6	5741.94	5871.32	5981.95	6079.56	6149.82
OECD Env-Growth	SSP5	DEU	GDP|PPP	billion US$2005/yr	2727.33	3001.15	3243.29	3531.06	3889.72	4344.94	4894.55	5494.45	6130.03	6819.94	7610.56	8482.43	9444.64	10487.2	11596	12749.6	13950.1	15212.5	16564
IIASA GDP	SSP1	DJI	GDP|PPP	billion US$2005/yr	1.68878	2.00932	2.19271	2.44367	2.84413	3.40407	4.1322	5.04552	6.16177	7.49283	9.04896	10.8439	12.8507	14.9811	17.1636	19.6975	22.4152	25.0069	27.1272
IIASA GDP	SSP2	DJI	GDP|PPP	billion US$2005/yr	1.68878	2.01023	2.14666	2.29121	2.52775	2.85791	3.27161	3.76565	4.34354	5.00783	5.76879	6.64963	7.66341	8.80714	10.0776	11.4857	13.03	14.7013	16.4873
IIASA GDP	SSP3	DJI	GDP|PPP	billion US$2005/yr	1.68878	2.00766	2.08298	2.10948	2.17497	2.28261	2.41186	2.54928	2.69068	2.8288	2.96837	3.11302	3.26241	3.41189	3.56229	3.71685	3.8746	4.04088	4.21368
IIASA GDP	SSP4	DJI	GDP|PPP	billion US$2005/yr	1.68878	2.00332	2.08331	2.13082	2.24074	2.41861	2.64925	2.92063	3.23026	3.5705	3.94885	4.36851	4.82737	5.31741	5.8399	6.40128	7.00177	7.65271	8.35224
IIASA GDP	SSP5	DJI	GDP|PPP	billion US$2005/yr	1.68878	2.01166	2.21857	2.53162	3.05436	3.8207	4.86906	6.25056	8.01935	10.2217	12.9003	16.0925	19.7582	23.7432	27.9041	32.7084	37.8798	43.1589	48.5415
OECD Env-Growth	SSP1	DJI	GDP|PPP	billion US$2005/yr	1.884	2.364	3.164	4.376	6.163	8.603	11.689	15.379	19.589	24.177	29.058	34.132	39.192	44.069	48.76	53.14	57.238	61.047	64.441
OECD Env-Growth	SSP2	DJI	GDP|PPP	billion US$2005/yr	1.884	2.381	3.171	4.33	5.883	7.851	10.266	13.129	16.44	20.172	24.342	28.969	33.986	39.336	44.986	50.938	57.143	63.57	70.164
OECD Env-Growth	SSP3	DJI	GDP|PPP	billion US$2005/yr	1.884	2.378	3.147	4.21	5.474	6.903	8.508	10.266	12.142	14.099	16.134	18.269	20.488	22.769	25.074	27.378	29.66	31.985	34.333
OECD Env-Growth	SSP4	DJI	GDP|PPP	billion US$2005/yr	1.884	2.379	3.143	4.173	5.412	6.787	8.338	10.053	11.912	13.887	15.985	18.228	20.605	23.096	25.663	28.278	30.925	33.673	36.505
OECD Env-Growth	SSP5	DJI	GDP|PPP	billion US$2005/yr	1.884	2.364	3.171	4.481	6.547	9.517	13.39	18.172	23.818	30.216	37.309	45.021	53.113	61.378	69.813	78.236	86.679	95.122	103.343
IIASA GDP	SSP1	DNK	GDP|PPP	billion US$2005/yr	186.639	192.044	198.209	210.27	226.605	246.231	268.373	292.707	318.767	346.72	376.865	409.282	443.887	480.506	518.793	558.454	599.132	639.693	679.739
IIASA GDP	SSP2	DNK	GDP|PPP	billion US$2005/yr	186.639	192.579	198.875	209.927	223.977	240.258	258.289	277.983	299.068	321.574	345.509	370.668	396.866	424.072	452.305	481.405	511.149	541.25	571.678
IIASA GDP	SSP3	DNK	GDP|PPP	billion US$2005/yr	186.639	192.289	196.786	203.63	210.898	218.338	225.929	233.754	241.641	249.66	257.604	265.251	272.585	279.46	285.676	291.024	295.433	298.867	301.412
IIASA GDP	SSP4	DNK	GDP|PPP	billion US$2005/yr	186.639	193.069	199.526	209.644	220.952	232.913	245.454	258.722	272.507	286.81	301.309	315.496	329.137	342.025	354.078	365.148	375.108	383.574	390.416
IIASA GDP	SSP5	DNK	GDP|PPP	billion US$2005/yr	186.639	192.862	201.897	219.991	246.306	280.159	321.03	369.143	424.594	488.309	561.688	645.917	741.484	848.826	968.273	1100.49	1246.19	1405.02	1577.18
OECD Env-Growth	SSP1	DNK	GDP|PPP	billion US$2005/yr	180.168	194.443	212.78	231.011	251.253	274.602	300.892	330.199	361.611	393.679	427.113	462.636	500.199	539.71	581.388	624.07	667.141	710.037	753.056
OECD Env-Growth	SSP2	DNK	GDP|PPP	billion US$2005/yr	180.168	194.08	211.42	227.151	243.015	261.01	282.888	309.114	338.981	370.734	404.615	441.04	480.017	521.56	566.164	612.794	660.703	709.811	760.622
OECD Env-Growth	SSP3	DNK	GDP|PPP	billion US$2005/yr	180.168	192.64	206.662	217.024	225.353	233.095	241.847	251.703	261.746	270.379	278.064	285.159	291.166	295.912	300.096	302.997	304.741	305.546	305.166
OECD Env-Growth	SSP4	DNK	GDP|PPP	billion US$2005/yr	180.168	193.55	210.224	227.131	246.038	267.494	290.89	316.402	343.054	369.063	395.136	421.447	447.301	472.36	497.65	522.097	545.603	568.166	589.155
OECD Env-Growth	SSP5	DNK	GDP|PPP	billion US$2005/yr	180.168	195.513	216.694	242.009	272.943	310.649	354.662	406.803	467.388	535.815	613.859	703.731	807.555	927.047	1062.86	1214.3	1381.35	1564.78	1768.54
IIASA GDP	SSP1	DOM	GDP|PPP	billion US$2005/yr	96.1234	123.662	146.854	167.013	190.02	215.937	243.729	271.464	297.117	319.258	337.179	351.091	363.881	377.778	393.498	410.318	427.018	441.991	453.95
IIASA GDP	SSP2	DOM	GDP|PPP	billion US$2005/yr	96.1234	123.899	145.878	161.648	177.991	199.43	226.256	256.632	287.498	316.883	343.756	367.974	389.745	409.355	428.458	448.604	470.466	493.928	518.473
IIASA GDP	SSP3	DOM	GDP|PPP	billion US$2005/yr	96.1234	123.61	143.276	156.035	169.677	186.299	206.652	230.031	253.572	276.012	297.442	319.181	341.781	365.515	390.41	416.19	442.971	470.905	500.529
IIASA GDP	SSP4	DOM	GDP|PPP	billion US$2005/yr	96.1234	122.231	138.658	146.108	152.353	159.759	169.443	180.789	191.237	199.37	205.076	209.223	212.193	214.244	215.782	216.625	216.63	215.809	214.076
IIASA GDP	SSP5	DOM	GDP|PPP	billion US$2005/yr	96.1234	123.608	147.221	168.861	194.893	225.492	259.439	294.283	327.334	356.631	384.873	415.318	450.028	488.784	530.49	573.802	617.181	658.566	696.139
OECD Env-Growth	SSP1	DOM	GDP|PPP	billion US$2005/yr	83.26	103.26	127.115	154.133	186.608	224.124	264.918	306.763	347.633	387.056	424.089	458.457	488.659	515.029	538.995	559.658	576.862	589.961	598.552
OECD Env-Growth	SSP2	DOM	GDP|PPP	billion US$2005/yr	83.26	103.975	128.565	153.93	181.029	209.627	240.75	274.011	309.048	345.825	383.842	423.393	464.068	505.789	548.481	591.698	635.07	678.313	721.149
OECD Env-Growth	SSP3	DOM	GDP|PPP	billion US$2005/yr	83.26	104.751	130.737	154.527	176.491	196.309	216.698	237.631	259.183	281.864	306.149	332.682	361.317	392.164	424.798	458.508	493.573	530.085	568.172
OECD Env-Growth	SSP4	DOM	GDP|PPP	billion US$2005/yr	83.26	103.502	127.079	149.687	173.499	197.714	223.062	248.941	274.972	301.258	327.352	352.765	376.473	398.558	419.438	438.396	455.623	471.198	484.717
OECD Env-Growth	SSP5	DOM	GDP|PPP	billion US$2005/yr	83.26	103.001	126.415	154.989	192.293	237.951	288.275	341.165	394.537	448.192	501.22	553.615	603.342	650.99	698.769	745.604	791.34	834.989	875.677
IIASA GDP	SSP1	DZA	GDP|PPP	billion US$2005/yr	207.611	244.794	277.799	326.531	393.942	479.622	582.192	695.533	810.684	918.711	1013.23	1091.03	1152.29	1198.45	1231.78	1257.59	1285.84	1321.39	1362.65
IIASA GDP	SSP2	DZA	GDP|PPP	billion US$2005/yr	207.611	245.096	275.711	318.484	376.084	448.728	535.948	633.862	736.35	837.284	932.253	1018.83	1096.28	1165.17	1226.77	1282.31	1334.22	1383.97	1432.3
IIASA GDP	SSP3	DZA	GDP|PPP	billion US$2005/yr	207.611	243.874	268.607	298.383	335.38	379.579	430.29	484.34	537.948	588.579	635.608	680.272	724.846	772.125	823.995	881.147	943.417	1010.55	1082.5
IIASA GDP	SSP4	DZA	GDP|PPP	billion US$2005/yr	207.611	242.013	261.646	284.139	312.149	346.934	387.918	431.656	473.281	510.123	541.698	569.195	593.764	615.567	634.456	650.578	664.565	676.708	686.803
IIASA GDP	SSP5	DZA	GDP|PPP	billion US$2005/yr	207.611	245	280.177	334.998	414.715	520.796	653.163	805.369	966.241	1123.59	1267.99	1393.87	1512.44	1638.19	1779.72	1937.39	2108.3	2288.15	2469.58
OECD Env-Growth	SSP1	DZA	GDP|PPP	billion US$2005/yr	268.295	310.773	376.244	462.689	559.447	657.912	757.912	873.644	1006.33	1152	1310.09	1478.76	1640.13	1786.91	1919.87	2039.51	2150.41	2252.57	2337.1
OECD Env-Growth	SSP2	DZA	GDP|PPP	billion US$2005/yr	268.295	312.438	380.324	463.917	545.477	612.169	671.988	743.584	833.754	940.422	1063.99	1205.1	1354.56	1508.44	1665.41	1826.05	1994.09	2170.8	2351.92
OECD Env-Growth	SSP3	DZA	GDP|PPP	billion US$2005/yr	268.295	314.331	385.55	468.551	542.086	588.097	611.045	632.788	666.814	713.937	773.838	846.636	927.234	1015.34	1109.48	1208.82	1315.77	1432.04	1558.06
OECD Env-Growth	SSP4	DZA	GDP|PPP	billion US$2005/yr	268.295	311.22	376.567	457.349	537.446	601.638	649.352	700.43	767.036	848.826	944.583	1051.24	1157.8	1260.79	1360.57	1457.32	1554.49	1652.71	1747.39
OECD Env-Growth	SSP5	DZA	GDP|PPP	billion US$2005/yr	268.295	310.547	375.745	469.749	587.826	721.954	865.592	1033.2	1226.77	1444.55	1688.65	1958.77	2231.89	2498.7	2760.51	3017.64	3276.94	3538.84	3788.85
IIASA GDP	SSP1	ECU	GDP|PPP	billion US$2005/yr	89.924	111.767	139.293	172.756	208.872	244.987	285.8	330.857	377.524	420.307	456.386	485.208	508.263	527.001	545.307	565.413	587.157	608.779	627.908
IIASA GDP	SSP2	ECU	GDP|PPP	billion US$2005/yr	89.924	111.422	136.316	165.582	197.308	230.459	264.668	299.372	339.576	384.242	430.247	473.374	512.286	547.006	578.066	605.94	631.312	657.882	688.113
IIASA GDP	SSP3	ECU	GDP|PPP	billion US$2005/yr	89.924	110.063	129.152	149.064	169.251	190.007	210.736	231.132	249.428	266.955	285.528	306.376	329.633	355.175	382.377	410.623	440.034	470.943	503.89
IIASA GDP	SSP4	ECU	GDP|PPP	billion US$2005/yr	89.924	108.861	125.423	141.202	155.629	169.271	182.145	194.187	203.856	211.783	219.017	226.089	232.867	239.195	245.002	249.886	253.838	257.045	259.42
IIASA GDP	SSP5	ECU	GDP|PPP	billion US$2005/yr	89.924	111.794	140.065	175.824	216.547	259.662	310.241	367.572	428.284	485.601	535.858	581.51	630.467	687.888	754.764	827.805	902.572	975.268	1042.28
OECD Env-Growth	SSP1	ECU	GDP|PPP	billion US$2005/yr	104.16	126.267	149.147	180.831	223.232	276.993	341.124	413.649	491.853	575.035	660.988	746.731	829.85	908.07	982.456	1050.12	1109.01	1158.49	1195.93
OECD Env-Growth	SSP2	ECU	GDP|PPP	billion US$2005/yr	104.16	127.048	150.959	180.709	215.201	253.597	298.437	349.74	407.379	471.88	542.918	619.691	701.903	788.737	879.643	973.852	1070.62	1169.63	1269.95
OECD Env-Growth	SSP3	ECU	GDP|PPP	billion US$2005/yr	104.16	128.268	154.093	181.636	208.976	234.626	262.497	292.376	325.044	360.996	400.816	444.738	493.266	546.637	604.112	665.215	730.856	801.307	876.964
OECD Env-Growth	SSP4	ECU	GDP|PPP	billion US$2005/yr	104.16	126.875	150.15	176.969	207.761	241.346	279.252	320.486	365.554	414.486	466.7	520.32	574.339	627.815	680.443	731.088	780.185	827.782	872.667
OECD Env-Growth	SSP5	ECU	GDP|PPP	billion US$2005/yr	104.16	126.081	148.714	183.232	234.464	303.883	388.385	486.353	595.026	714.215	841.83	974.762	1109.89	1244.6	1380.96	1515.17	1644.24	1766.98	1878.67
IIASA GDP	SSP1	EGY	GDP|PPP	billion US$2005/yr	390.937	511.217	636.931	781.948	962.236	1179.5	1430.8	1704.55	1985.62	2258.23	2509.33	2730.62	2920.47	3078.72	3206.96	3306.92	3398.93	3500.2	3613.97
IIASA GDP	SSP2	EGY	GDP|PPP	billion US$2005/yr	390.937	511.738	629.427	754.345	902.892	1080.96	1290.08	1525.74	1779.52	2042.99	2308.48	2568.13	2814.93	3042.95	3249.81	3435.34	3602.13	3752.02	3886.13
IIASA GDP	SSP3	EGY	GDP|PPP	billion US$2005/yr	390.937	511.298	620.17	721.733	828.665	946.205	1075.24	1213.15	1355.23	1496.13	1631.53	1761.14	1886.86	2012.17	2139.84	2271.4	2407.14	2546.97	2690.4
IIASA GDP	SSP4	EGY	GDP|PPP	billion US$2005/yr	390.937	506.602	604.933	689.249	772.31	861.26	958.724	1061.76	1164.25	1260.97	1348.51	1427.06	1497.62	1559.33	1611.04	1652.58	1684.88	1708.24	1722.61
IIASA GDP	SSP5	EGY	GDP|PPP	billion US$2005/yr	390.937	511.623	642.493	802.783	1014.38	1283.29	1608.97	1978.69	2372.97	2770.14	3151.43	3503.65	3846.36	4215.96	4635.5	5105.97	5614.85	6146.37	6680.62
OECD Env-Growth	SSP1	EGY	GDP|PPP	billion US$2005/yr	449.698	529.107	708.512	949.807	1279.66	1706.98	2211.75	2761.1	3326.03	3908.13	4502.85	5087.41	5630.08	6119.94	6562.2	6960.06	7318.16	7631.88	7881.53
OECD Env-Growth	SSP2	EGY	GDP|PPP	billion US$2005/yr	449.698	532.191	713.422	938.518	1212.6	1538.82	1918.48	2340.88	2798.54	3301.11	3849.55	4432.07	5032.36	5644.27	6266.97	6902.37	7546.8	8191.21	8826.98
OECD Env-Growth	SSP3	EGY	GDP|PPP	billion US$2005/yr	449.698	534.801	719.177	926.668	1148.72	1379.84	1626.01	1877.73	2131.88	2407.14	2709.63	3037.05	3383.76	3749.39	4131.22	4528.12	4942.89	5374.71	5821.43
OECD Env-Growth	SSP4	EGY	GDP|PPP	billion US$2005/yr	449.698	529.171	702.058	906.922	1156.22	1442.6	1760.87	2095.82	2437.86	2801.96	3187.84	3576.55	3948	4296.23	4625	4936.89	5234.6	5512.89	5760.12
OECD Env-Growth	SSP5	EGY	GDP|PPP	billion US$2005/yr	449.698	528.682	708.613	970.592	1356.45	1882.74	2518.74	3232.65	3994.16	4812.98	5688.98	6597.56	7496.58	8373.07	9235.05	10086.4	10933.8	11769.5	12558.7
IIASA GDP	SSP1	ERI	GDP|PPP	billion US$2005/yr	3.34715	3.98525	6.35211	10.9694	17.53	25.5353	34.5563	44.6923	56.5951	70.7155	87.2882	106.144	126.625	147.853	169.776	195.92	225.054	253.97	278.741
IIASA GDP	SSP2	ERI	GDP|PPP	billion US$2005/yr	3.34715	4.00296	6.30179	10.5372	16.1416	22.4664	29.0521	35.977	43.7533	52.7214	63.1318	75.0898	88.5999	103.622	120.413	139.227	160.188	182.956	206.816
IIASA GDP	SSP3	ERI	GDP|PPP	billion US$2005/yr	3.34715	3.97477	6.00483	9.38582	13.3067	17.1583	20.5875	23.6637	26.6851	29.7508	32.9039	36.1538	39.4937	42.8899	46.4125	50.0921	53.9588	57.9774	62.1625
IIASA GDP	SSP4	ERI	GDP|PPP	billion US$2005/yr	3.34715	3.97245	6.03173	9.55446	13.8589	18.4144	22.8932	27.3569	32.1658	37.4883	43.4427	50.0505	57.2902	65.0928	73.565	82.7685	92.7836	103.584	115.226
IIASA GDP	SSP5	ERI	GDP|PPP	billion US$2005/yr	3.34715	3.99584	6.45837	11.4776	19.1088	29.1954	41.5459	56.4885	75.0462	98.096	126.286	159.599	197.061	237.044	278.963	328.423	383.489	443.923	508.97
OECD Env-Growth	SSP1	ERI	GDP|PPP	billion US$2005/yr	2.573	3.187	3.579	4.636	6.429	9.376	13.979	20.892	30.955	44.987	63.763	87.63	116.237	148.845	185.263	224.921	267.196	310.829	353.961
OECD Env-Growth	SSP2	ERI	GDP|PPP	billion US$2005/yr	2.573	3.233	3.562	4.383	5.493	6.937	8.952	11.762	15.686	21.106	28.478	38.241	50.809	66.616	86.286	110.448	139.63	174.032	213.554
OECD Env-Growth	SSP3	ERI	GDP|PPP	billion US$2005/yr	2.573	3.208	3.412	3.988	4.633	5.288	6.094	7.099	8.369	9.968	11.958	14.4	17.336	20.822	24.963	29.816	35.469	41.982	49.44
OECD Env-Growth	SSP4	ERI	GDP|PPP	billion US$2005/yr	2.573	3.215	3.419	3.958	4.527	4.994	5.504	6.082	6.753	7.53	8.413	9.393	10.458	11.604	12.852	14.203	15.671	17.266	19.018
OECD Env-Growth	SSP5	ERI	GDP|PPP	billion US$2005/yr	2.573	3.193	3.611	4.852	7.228	11.513	18.529	29.474	45.847	69.179	101.021	142.305	192.885	252.017	319.854	396.057	480.157	570.559	664.4
IIASA GDP	SSP1	ESP	GDP|PPP	billion US$2005/yr	1279.95	1466.54	1711.05	2019.87	2348.41	2688.93	3029.7	3362.76	3682.43	3992.62	4290.91	4562.24	4790.68	4974.25	5122.84	5246.01	5361.08	5480.78	5602.73
IIASA GDP	SSP2	ESP	GDP|PPP	billion US$2005/yr	1279.95	1467.51	1707.83	2001.37	2303.12	2607.76	2906.26	3189.92	3452.57	3699.65	3932.76	4145.83	4333.43	4496.59	4642.95	4782.26	4921.68	5060.89	5191.67
IIASA GDP	SSP3	ESP	GDP|PPP	billion US$2005/yr	1279.95	1369.82	1427.05	1479.33	1536.88	1606.07	1681.07	1748.53	1796.57	1828.08	1847.45	1857.84	1860.71	1857.15	1850.29	1844.34	1842.87	1844.04	1842.32
IIASA GDP	SSP4	ESP	GDP|PPP	billion US$2005/yr	1279.95	1467.23	1700.21	1974.43	2242.41	2502.06	2747.28	2967.71	3152.86	3312.71	3455.32	3581.32	3688.17	3771.78	3831.81	3874.54	3911.51	3946.73	3974.21
IIASA GDP	SSP5	ESP	GDP|PPP	billion US$2005/yr	1279.95	1474.52	1744.94	2110.38	2533.68	3010.91	3530.89	4087.06	4673.56	5294.35	5948.89	6620.39	7285.83	7938.55	8586.93	9239.13	9913.55	10629.5	11391.1
OECD Env-Growth	SSP1	ESP	GDP|PPP	billion US$2005/yr	1242.3	1312.09	1396.96	1488.19	1613.35	1763.99	1921.02	2075.76	2237.53	2420.74	2626.93	2843.71	3046.14	3227.38	3403.49	3573.01	3745.19	3916.41	4072.95
OECD Env-Growth	SSP2	ESP	GDP|PPP	billion US$2005/yr	1242.3	1310.6	1392.13	1472.78	1569.99	1675.92	1784.01	1892.21	2013.41	2158.1	2326.83	2510.42	2691.41	2865.13	3044.37	3231.11	3430.45	3637.34	3839.14
OECD Env-Growth	SSP3	ESP	GDP|PPP	billion US$2005/yr	1242.3	1298.55	1360.83	1403.65	1444.08	1473.53	1487.77	1487.53	1489.23	1499.25	1516.26	1534.52	1540.48	1534.81	1532.55	1533.32	1540.25	1548.56	1549.19
OECD Env-Growth	SSP4	ESP	GDP|PPP	billion US$2005/yr	1242.3	1307.64	1382.53	1458.27	1561.82	1684.42	1807.92	1928.02	2060.95	2213.51	2383.49	2559.99	2721.31	2862.87	3003.73	3143.25	3286.91	3428.23	3551.24
OECD Env-Growth	SSP5	ESP	GDP|PPP	billion US$2005/yr	1242.3	1322.1	1422.13	1549.95	1744.12	1996.7	2280.39	2589.51	2938.51	3352.33	3843.98	4404.85	5008.6	5646.29	6336.28	7079.97	7895.09	8779.28	9716.82
IIASA GDP	SSP1	EST	GDP|PPP	billion US$2005/yr	21.1659	25.1543	27.6418	30.7932	33.5411	35.8932	37.9216	39.7832	41.6655	43.9086	46.697	49.996	53.6817	57.6566	61.8573	66.2185	70.675	75.1905	79.9353
IIASA GDP	SSP2	EST	GDP|PPP	billion US$2005/yr	21.1659	25.244	27.6763	30.4684	32.5903	34.2631	35.7028	37.0779	38.4009	39.8459	41.5772	43.6243	45.9305	48.4167	51.03	53.7736	56.6853	59.7742	63.027
IIASA GDP	SSP3	EST	GDP|PPP	billion US$2005/yr	21.1659	25.2604	27.463	29.6099	30.6783	31.1027	31.2387	31.2725	31.1878	31.0402	30.8631	30.7167	30.6393	30.6043	30.5667	30.5164	30.4751	30.4345	30.3589
IIASA GDP	SSP4	EST	GDP|PPP	billion US$2005/yr	21.1659	25.3262	27.728	30.2488	31.8367	32.8944	33.7673	34.6373	35.4679	36.3116	37.2792	38.3958	39.6465	40.9363	42.171	43.3176	44.4207	45.5174	46.6302
IIASA GDP	SSP5	EST	GDP|PPP	billion US$2005/yr	21.1659	25.2253	28.0361	31.9312	35.9273	39.9489	43.95	48.3535	53.5692	60.0359	68.0116	77.5465	88.5877	101.123	115.202	130.876	148.17	167.142	188.149
OECD Env-Growth	SSP1	EST	GDP|PPP	billion US$2005/yr	22.253	27.749	32.863	38.142	43.968	50.195	56.264	61.924	66.857	71.169	76.194	81.789	87.367	92.454	97.324	101.996	106.705	111.688	116.771
OECD Env-Growth	SSP2	EST	GDP|PPP	billion US$2005/yr	22.253	27.713	32.636	37.394	42.481	48.05	53.844	59.57	64.84	69.581	75.024	81.046	87.12	92.784	98.277	103.695	109.339	115.442	121.805
OECD Env-Growth	SSP3	EST	GDP|PPP	billion US$2005/yr	22.253	27.586	32.065	35.846	39.492	43.041	46.328	49.03	50.816	51.701	52.773	53.877	54.499	54.355	53.832	53.063	52.292	51.612	50.797
OECD Env-Growth	SSP4	EST	GDP|PPP	billion US$2005/yr	22.253	27.655	32.542	37.538	43.035	48.799	54.32	59.436	63.904	67.693	72.045	76.726	81.102	84.7	87.918	90.849	93.798	96.958	100.009
OECD Env-Growth	SSP5	EST	GDP|PPP	billion US$2005/yr	22.253	27.833	33.336	39.689	47.159	55.485	64.166	73.245	82.51	92.138	103.775	117.491	132.879	149.481	167.469	186.95	208.39	232.424	259.156
IIASA GDP	SSP1	ETH	GDP|PPP	billion US$2005/yr	58.3396	90.1519	125.364	156.598	189.619	232.57	289.012	363.579	458.281	576.533	721.079	894.453	1096.54	1346.58	1636.11	1942.01	2231.58	2487.94	2705.36
IIASA GDP	SSP2	ETH	GDP|PPP	billion US$2005/yr	58.3396	86.074	114.422	137.36	161.307	190.58	226.069	269.366	320.396	381.632	455.866	546.131	654.675	783.494	931.2	1096.01	1276.13	1472.19	1715.12
IIASA GDP	SSP3	ETH	GDP|PPP	billion US$2005/yr	58.3396	83.7915	107.094	122.089	134.99	148.373	161.845	175.569	188.768	202.321	216.813	232.637	249.578	267.316	284.906	302.027	318.811	335.562	352.741
IIASA GDP	SSP4	ETH	GDP|PPP	billion US$2005/yr	58.3396	83.5055	107.138	123.859	140.704	160.501	183.395	209.849	239.064	272.19	310.383	354.655	405.23	462.127	524.177	591.049	663.188	741.5	827.387
IIASA GDP	SSP5	ETH	GDP|PPP	billion US$2005/yr	58.3396	90.2099	126.823	162.522	204.802	264.01	346.68	461.521	614.674	814.333	1068.1	1382.82	1759.94	2232.05	2786.91	3384.35	3963.77	4490.57	5000.01
OECD Env-Growth	SSP1	ETH	GDP|PPP	billion US$2005/yr	77.328	106.964	148.134	209.408	306.751	457.548	680.036	991.958	1406.96	1932.36	2566.97	3305.19	4137.16	5045.68	6004	6984.45	7965.9	8937.66	9878.23
OECD Env-Growth	SSP2	ETH	GDP|PPP	billion US$2005/yr	77.328	107.936	149.843	203.589	275.659	369.265	497.629	670.221	895.67	1183.64	1543.86	1988.08	2529.57	3178.51	3936.8	4806.6	5789.08	6887.76	8100.55
OECD Env-Growth	SSP3	ETH	GDP|PPP	billion US$2005/yr	77.328	108.584	151.126	198.378	252.318	309.879	379.882	464.405	563.447	677.77	809.222	961.152	1136.99	1338.5	1562.88	1809.33	2078.41	2371.46	2692.05
OECD Env-Growth	SSP4	ETH	GDP|PPP	billion US$2005/yr	77.328	108.554	150.476	194.923	242.8	287.787	338.809	396.54	459.627	527.548	600.687	680.36	767.969	863.58	964.589	1070.57	1182.02	1300.36	1428.33
OECD Env-Growth	SSP5	ETH	GDP|PPP	billion US$2005/yr	77.328	106.89	148.521	216.559	336.684	537.948	844.789	1285.91	1885.19	2658.95	3613.04	4749.13	6062.99	7541.54	9159.15	10884.7	12695	14581.4	16515.5
IIASA GDP	SSP1	FIN	GDP|PPP	billion US$2005/yr	168.979	188.694	209.228	235.408	263.158	291.222	319.362	347.696	376.406	406.057	437.563	471.239	506.514	542.84	580.054	617.608	654.91	692.084	729.376
IIASA GDP	SSP2	FIN	GDP|PPP	billion US$2005/yr	168.979	188.794	208.942	233.79	259.004	283.353	306.88	330.085	353.445	377.57	403.121	430.171	458.446	487.656	517.577	547.882	578.525	609.59	640.696
IIASA GDP	SSP3	FIN	GDP|PPP	billion US$2005/yr	168.979	181.269	187.756	195.037	202.351	209.347	216.132	222.766	229.294	235.964	242.889	249.908	256.831	263.3	269.022	273.89	278.024	281.505	284.333
IIASA GDP	SSP4	FIN	GDP|PPP	billion US$2005/yr	168.979	188.994	209.34	233.873	257.116	277.685	296.126	313.353	329.936	346.432	363.144	379.834	396.256	411.94	426.421	439.178	450.182	459.516	466.856
IIASA GDP	SSP5	FIN	GDP|PPP	billion US$2005/yr	168.979	189.429	212.741	245.141	283.548	326.868	374.846	427.822	486.338	551.631	625.734	709.93	803.831	907.12	1020.22	1143.44	1276.94	1421.79	1579.11
OECD Env-Growth	SSP1	FIN	GDP|PPP	billion US$2005/yr	170.072	190.604	209.75	229.651	252.726	279.186	307.357	334.796	361.822	389.311	418.032	449.562	482.61	516.227	550.343	584.403	618.373	652.914	688.322
OECD Env-Growth	SSP2	FIN	GDP|PPP	billion US$2005/yr	170.072	190.274	208.1	225.135	243.305	263.742	286.734	310.531	335.642	362.522	391.387	423.424	457.749	493.52	530.659	568.873	608.326	649.439	692.234
OECD Env-Growth	SSP3	FIN	GDP|PPP	billion US$2005/yr	170.072	188.975	203.986	216.246	227.199	237.645	247.927	256.246	263.06	269.026	274.491	280.255	285.002	288.002	289.801	290.425	290.448	290.167	289.108
OECD Env-Growth	SSP4	FIN	GDP|PPP	billion US$2005/yr	170.072	189.729	206.955	225.748	247.49	271.883	297.008	320.547	342.84	364.718	386.777	409.931	432.561	453.559	473.579	492.445	510.809	528.958	545.718
OECD Env-Growth	SSP5	FIN	GDP|PPP	billion US$2005/yr	170.072	191.559	213.6	240.113	273.673	314.268	359.717	408.733	462.59	523.038	591.945	672.566	765.313	870.278	987.105	1115.62	1256.38	1412.13	1586.66
IIASA GDP	SSP1	FJI	GDP|PPP	billion US$2005/yr	3.71843	4.47402	5.94924	8.13716	10.3787	12.4219	14.1145	15.5107	16.6636	17.7886	19.2263	20.862	22.442	23.8643	25.2601	26.7373	28.3152	29.9524	31.5689
IIASA GDP	SSP2	FJI	GDP|PPP	billion US$2005/yr	3.71843	4.50373	6.02056	8.18833	10.3404	12.2799	13.9381	15.4153	16.8093	18.2695	19.7584	21.314	22.9087	24.4847	26.0818	28.3143	31.1765	34.5212	38.0871
IIASA GDP	SSP3	FJI	GDP|PPP	billion US$2005/yr	3.71843	4.50015	5.99827	8.12283	10.1975	12.0119	13.4995	14.7722	15.9401	17.1364	18.3474	19.6045	20.912	22.2634	23.7008	25.2723	27.0054	28.8859	30.9205
IIASA GDP	SSP4	FJI	GDP|PPP	billion US$2005/yr	3.71843	4.45668	5.78341	7.47805	8.84738	9.77488	10.3184	10.6356	10.8424	11.0325	11.182	11.2979	11.3719	11.3965	11.4215	11.485	11.5952	11.7317	11.8618
IIASA GDP	SSP5	FJI	GDP|PPP	billion US$2005/yr	3.71843	4.46118	5.90247	8.01354	10.1542	12.0928	13.693	14.9997	16.0551	17.062	18.3796	19.8831	21.541	23.2875	25.1715	27.1868	29.3352	31.6116	33.9728
OECD Env-Growth	SSP1	FJI	GDP|PPP	billion US$2005/yr	3.575	3.902	4.336	5.071	6.195	7.707	9.545	11.659	14.015	16.56	19.208	21.954	24.677	27.271	29.818	32.311	34.748	37.1	39.304
OECD Env-Growth	SSP2	FJI	GDP|PPP	billion US$2005/yr	3.575	3.955	4.416	5.1	5.98	7.014	8.244	9.676	11.33	13.227	15.356	17.771	20.445	23.349	26.53	30.016	33.824	37.94	42.343
OECD Env-Growth	SSP3	FJI	GDP|PPP	billion US$2005/yr	3.575	3.954	4.431	5.069	5.786	6.515	7.321	8.205	9.171	10.227	11.361	12.614	13.982	15.459	17.073	18.826	20.735	22.808	25.067
OECD Env-Growth	SSP4	FJI	GDP|PPP	billion US$2005/yr	3.575	3.899	4.273	4.76	5.278	5.689	6.063	6.388	6.67	6.918	7.12	7.297	7.434	7.526	7.608	7.683	7.758	7.837	7.916
OECD Env-Growth	SSP5	FJI	GDP|PPP	billion US$2005/yr	3.575	3.878	4.262	5.015	6.295	8.093	10.245	12.674	15.321	18.118	20.96	23.886	26.773	29.53	32.32	35.174	38.161	41.317	44.598
IIASA GDP	SSP1	FRA	GDP|PPP	billion US$2005/yr	1986.58	2168.38	2549.57	3074.76	3659.01	4266.6	4874.21	5472.16	6059.05	6636.84	7211.6	7778.18	8335.6	8889.91	9449.41	10014.9	10575	11125	11672.7
IIASA GDP	SSP2	FRA	GDP|PPP	billion US$2005/yr	1986.58	2167.26	2539.83	3043.63	3590.51	4144.72	4683.45	5198.27	5689.57	6165.09	6635.4	7105.1	7577.51	8055.63	8540.94	9034.06	9523.29	10001.6	10470.7
IIASA GDP	SSP3	FRA	GDP|PPP	billion US$2005/yr	1986.58	1975.93	2001.55	2055.39	2144.27	2258.13	2383.96	2509.47	2627.13	2736.17	2838.01	2933.83	3025.73	3112.28	3191.56	3262.54	3325.5	3380.37	3426.28
IIASA GDP	SSP4	FRA	GDP|PPP	billion US$2005/yr	1986.58	2169.7	2541.63	3034.97	3547.25	4040.35	4496.54	4912.46	5290.76	5641.27	5973.91	6292.16	6600.17	6896.16	7177.23	7442.26	7681.7	7889.75	8067.91
IIASA GDP	SSP5	FRA	GDP|PPP	billion US$2005/yr	1986.58	2176.48	2586.41	3178.05	3881.52	4666.41	5510.13	6404.29	7348.08	8345.92	9411.92	10548.9	11756.1	13043	14424.7	15911.6	17502.1	19202.6	21032.9
OECD Env-Growth	SSP1	FRA	GDP|PPP	billion US$2005/yr	1921.79	2048.82	2242.86	2469.66	2751.08	3086.83	3453.96	3836.52	4215.72	4601.07	5008.84	5427.1	5843.52	6254.77	6664.44	7067.78	7468.07	7866.14	8257.43
OECD Env-Growth	SSP2	FRA	GDP|PPP	billion US$2005/yr	1921.79	2046.18	2233.77	2438.59	2668.77	2923.78	3201.25	3494.03	3789.86	4098.25	4432.07	4783.02	5142	5507	5882.24	6268.01	6662.6	7066.01	7475.29
OECD Env-Growth	SSP3	FRA	GDP|PPP	billion US$2005/yr	1921.79	2034.7	2191.68	2349.69	2504.34	2650.24	2784.65	2899.63	2985.71	3056.49	3126.92	3190.66	3238.24	3269.7	3293.63	3311.8	3329.43	3347.1	3358.09
OECD Env-Growth	SSP4	FRA	GDP|PPP	billion US$2005/yr	1921.79	2041.2	2220.46	2432.84	2694.19	2999.6	3325.09	3657.71	3980.64	4303.59	4642.1	4983.07	5310.84	5621.75	5926.01	6222.99	6512.89	6796.31	7061.64
OECD Env-Growth	SSP5	FRA	GDP|PPP	billion US$2005/yr	1921.79	2058.13	2273.17	2558.28	2948.84	3447.42	4024.03	4674.43	5388.4	6185.35	7094.87	8117.29	9256.66	10521.5	11914.7	13437.7	15102.3	16925.1	18930.8
IIASA GDP	SSP1	GAB	GDP|PPP	billion US$2005/yr	15.5685	16.7021	18.4542	20.8928	24.161	28.1824	32.7968	37.7702	43.0425	49.1552	55.8674	62.6155	68.7239	74.2978	79.787	85.4811	91.3516	97.1909	102.77
IIASA GDP	SSP2	GAB	GDP|PPP	billion US$2005/yr	15.5685	16.5192	17.6965	19.2881	21.556	24.5141	28.0409	32.025	36.3552	40.9732	45.8364	50.9902	56.3863	62.9488	70.3526	77.9611	85.3908	92.8031	100.396
IIASA GDP	SSP3	GAB	GDP|PPP	billion US$2005/yr	15.5685	16.1239	16.4096	16.8368	17.7472	19.078	20.6196	22.2634	23.8907	25.5323	27.2534	29.1653	31.291	33.5617	35.9602	38.4275	41.0355	43.7936	46.7662
IIASA GDP	SSP4	GAB	GDP|PPP	billion US$2005/yr	15.5685	16.09	16.3245	16.6774	17.5191	18.8003	20.3622	22.1218	23.9745	25.9556	28.1417	30.625	33.3999	36.3677	39.4978	42.7235	46.124	49.7065	53.5354
IIASA GDP	SSP5	GAB	GDP|PPP	billion US$2005/yr	15.5685	16.7277	18.6281	21.4238	25.3325	30.3205	36.254	42.8895	50.1493	58.6851	68.2343	78.4109	89.2654	101.093	113.99	127.73	141.982	156.357	170.477
OECD Env-Growth	SSP1	GAB	GDP|PPP	billion US$2005/yr	20.49	23.96	27.81	33.598	40.888	49.624	59.67	70.777	82.442	94.307	106.019	117.396	128.076	137.714	146.561	154.268	160.81	166.244	170.467
OECD Env-Growth	SSP2	GAB	GDP|PPP	billion US$2005/yr	20.49	24.131	27.787	32.683	38.22	44.307	51.282	59.132	67.734	77.046	86.997	97.629	108.785	120.293	132.164	144.215	156.253	168.137	179.756
OECD Env-Growth	SSP3	GAB	GDP|PPP	billion US$2005/yr	20.49	24.253	27.577	31.249	34.852	38.277	41.969	45.926	50.098	54.365	58.702	63.276	68.08	73.007	78.064	83.088	88.231	93.427	98.765
OECD Env-Growth	SSP4	GAB	GDP|PPP	billion US$2005/yr	20.49	24.263	27.399	30.778	34.542	38.526	43.155	48.479	54.526	61.198	68.5	76.611	85.58	95.31	105.827	116.954	128.903	141.606	155.221
OECD Env-Growth	SSP5	GAB	GDP|PPP	billion US$2005/yr	20.49	23.969	27.886	34.225	42.921	54.034	67.224	82.329	98.863	116.498	134.905	153.876	172.921	191.541	210.025	227.835	244.842	261.018	276.068
IIASA GDP	SSP1	GBR	GDP|PPP	billion US$2005/yr	2071.3	2344.04	2769.48	3376.31	4056.65	4764.22	5468.9	6161.39	6840.17	7513.69	8196.77	8891.22	9591.81	10290.2	10989.9	11692	12378.5	13041.1	13692.8
IIASA GDP	SSP2	GBR	GDP|PPP	billion US$2005/yr	2071.3	2344.76	2760.36	3336.15	3959.32	4588.38	5199.99	5790.77	6360.71	6919.26	7481.84	8054.52	8638.66	9234.42	9841.19	10455.7	11073.4	11692.9	12313.9
IIASA GDP	SSP3	GBR	GDP|PPP	billion US$2005/yr	2071.3	2199.69	2335.82	2520.13	2717.17	2915.16	3106.22	3285.22	3445.28	3586.14	3712.28	3828.41	3939.51	4044.85	4141.21	4226.44	4301.86	4368.9	4427.42
IIASA GDP	SSP4	GBR	GDP|PPP	billion US$2005/yr	2071.3	2347.6	2760.66	3316.56	3884.76	4421.92	4912.66	5360.49	5766.1	6137.31	6485.08	6814.56	7132.41	7438.25	7728.3	7996.54	8239.71	8458.06	8654.92
IIASA GDP	SSP5	GBR	GDP|PPP	billion US$2005/yr	2071.3	2354.17	2812.94	3495.61	4310.53	5217.83	6187.57	7211.7	8290.09	9434.23	10668.4	12003.9	13436.9	14962.3	16590.5	18332.1	20176.2	22122.1	24191.9
OECD Env-Growth	SSP1	GBR	GDP|PPP	billion US$2005/yr	2014.29	2189.42	2484.1	2787.3	3117.23	3481.37	3873.85	4285.18	4682.3	5073.84	5492.78	5944.83	6418.49	6883.05	7339.67	7792.72	8242.71	8698.06	9159.14
OECD Env-Growth	SSP2	GBR	GDP|PPP	billion US$2005/yr	2014.29	2186.47	2469.65	2733.37	2989.88	3255.24	3550.31	3872.14	4196.67	4528.86	4894.74	5297.05	5727.21	6162.32	6601.62	7049.63	7511.55	7994.31	8497.52
OECD Env-Growth	SSP3	GBR	GDP|PPP	billion US$2005/yr	2014.29	2170.98	2413.46	2612.67	2772.06	2902.11	3023.14	3130.62	3205.97	3258.65	3313.97	3374.03	3426.48	3453.39	3463.08	3463.48	3462.61	3465.93	3465.86
OECD Env-Growth	SSP4	GBR	GDP|PPP	billion US$2005/yr	2014.29	2180.49	2453.56	2738.21	3038.31	3355.87	3683.52	4014.36	4323.92	4618.4	4928.13	5252.15	5575.45	5870.93	6148.38	6414.56	6678.93	6950.9	7217.33
OECD Env-Growth	SSP5	GBR	GDP|PPP	billion US$2005/yr	2014.29	2201.94	2530.44	2916.66	3387.81	3947.76	4582.5	5299.3	6074.99	6929.44	7913.84	9053.99	10362.6	11819.6	13418.7	15174.8	17099	19218.9	21573
IIASA GDP	SSP1	GEO	GDP|PPP	billion US$2005/yr	23.3723	37.1414	63.7168	94.5684	113.142	116.156	112.226	108.067	106.237	106.718	108.665	111.218	113.811	116.258	118.463	120.368	121.689	122.21	122.186
IIASA GDP	SSP2	GEO	GDP|PPP	billion US$2005/yr	23.3723	37.3004	63.796	93.735	110.932	113.211	108.732	103.91	101.162	100.546	101.443	103.249	105.503	108.016	110.777	113.911	117.55	121.763	126.57
IIASA GDP	SSP3	GEO	GDP|PPP	billion US$2005/yr	23.3723	37.5884	64.5965	95.206	113.046	116.273	115.572	115.763	117.835	120.781	124.654	129.554	135.496	142.462	150.451	159.554	169.9	181.58	194.552
IIASA GDP	SSP4	GEO	GDP|PPP	billion US$2005/yr	23.3723	37.1166	62.4063	89.1881	102.165	101.084	94.0803	87.1105	82.1649	79.02	76.7838	74.751	72.7671	70.9847	69.5204	68.4046	67.6208	67.105	66.7765
IIASA GDP	SSP5	GEO	GDP|PPP	billion US$2005/yr	23.3723	37.0544	63.4338	94.0674	112.901	117.363	115.555	113.689	114.158	117.055	121.324	125.932	130.215	134.059	137.409	140.297	142.475	143.792	144.631
OECD Env-Growth	SSP1	GEO	GDP|PPP	billion US$2005/yr	20.242	27.221	34.753	43.656	54.346	66.807	79.543	91.321	101.374	109.499	116.356	123.005	128.497	132.154	133.964	135.159	135.899	136.232	135.97
OECD Env-Growth	SSP2	GEO	GDP|PPP	billion US$2005/yr	20.242	27.292	34.528	41.358	47.928	54.705	61.916	69.007	75.648	81.785	87.923	94.817	101.771	108.219	113.836	119.568	125.864	132.829	140.183
OECD Env-Growth	SSP3	GEO	GDP|PPP	billion US$2005/yr	20.242	27.516	35.075	41.378	46.559	51.097	55.866	60.554	65.008	69.267	73.879	79.572	85.877	92.389	98.669	105.364	112.875	121.258	130.315
OECD Env-Growth	SSP4	GEO	GDP|PPP	billion US$2005/yr	20.242	27.192	34.281	41.096	47.99	55.18	62.592	69.589	75.863	81.353	86.536	92.002	96.986	100.921	103.653	106.116	108.709	111.483	114.078
OECD Env-Growth	SSP5	GEO	GDP|PPP	billion US$2005/yr	20.242	27.056	34.585	44.769	58.024	73.44	88.301	101.393	112.176	120.796	128.097	135.168	141.032	145.123	147.544	149.501	151.28	153.185	155.087
IIASA GDP	SSP1	GHA	GDP|PPP	billion US$2005/yr	29.6405	39.2978	50.0345	63.8362	83.4008	110.397	146.87	193.997	251.733	318.279	391.054	467.345	545.129	622.388	697.505	769.104	836.008	896.891	950.449
IIASA GDP	SSP2	GHA	GDP|PPP	billion US$2005/yr	29.6405	39.0576	47.8403	57.169	69.0929	84.6647	104.895	130.488	161.915	199.525	243.795	295.284	354.271	420.831	494.404	574.154	658.831	747.018	837.547
IIASA GDP	SSP3	GHA	GDP|PPP	billion US$2005/yr	29.6405	38.8473	46.4469	53.0231	60.2386	68.6227	78.3674	89.3311	101.235	113.74	126.619	139.852	153.525	167.722	182.552	197.971	213.937	230.446	247.564
IIASA GDP	SSP4	GHA	GDP|PPP	billion US$2005/yr	29.6405	38.7388	46.4605	53.7308	62.5925	73.8568	88.0118	105.194	125.399	148.578	174.845	204.62	238.443	276.82	320.267	369.006	423.166	482.852	548.265
IIASA GDP	SSP5	GHA	GDP|PPP	billion US$2005/yr	29.6405	39.3364	50.633	66.2197	89.8359	124.464	173.871	241.06	327.474	432.004	551.915	683.514	823.279	967.174	1111.57	1253.37	1395.92	1552.92	1733.54
OECD Env-Growth	SSP1	GHA	GDP|PPP	billion US$2005/yr	36.062	55.153	77.543	110.358	158.72	228.643	321.624	438.635	579.069	744.039	933.211	1142.77	1364.38	1588.8	1816.17	2043.04	2263.85	2473.6	2664.39
OECD Env-Growth	SSP2	GHA	GDP|PPP	billion US$2005/yr	36.062	55.799	78.909	108.797	146.224	192.465	250.972	324.134	414.345	525.286	660.201	821.237	1008.74	1221.93	1460.92	1725.4	2013.73	2322.32	2646.94
OECD Env-Growth	SSP3	GHA	GDP|PPP	billion US$2005/yr	36.062	56.214	79.745	106.62	135.316	164.25	196.746	233.437	274.819	322.918	379.032	444.119	518.518	602.134	695.226	796.929	907.558	1026.59	1154.2
OECD Env-Growth	SSP4	GHA	GDP|PPP	billion US$2005/yr	36.062	56.202	79.52	104.961	130.783	154.137	178.912	205.761	235.078	268.217	305.507	347.011	392.778	442.374	495.673	552.286	612.284	675.545	742.645
OECD Env-Growth	SSP5	GHA	GDP|PPP	billion US$2005/yr	36.062	55.127	77.674	113.512	171.59	261.494	384.581	543.554	739.008	974.364	1251.81	1569.22	1917.3	2285.78	2677.98	3091.41	3520.21	3958.57	4394.4
IIASA GDP	SSP1	GIN	GDP|PPP	billion US$2005/yr	8.27545	9.58793	11.6079	14.9239	19.7396	26.5169	35.6781	47.4909	61.9492	78.6369	96.9025	116.266	136.524	157.458	178.771	200.055	220.872	240.773	259.373
IIASA GDP	SSP2	GIN	GDP|PPP	billion US$2005/yr	8.27545	9.23217	10.8626	13.5305	17.143	21.5494	26.7883	32.958	40.1393	48.2196	57.0199	66.6439	77.347	89.4407	103.177	118.744	137.314	158.994	183.429
IIASA GDP	SSP3	GIN	GDP|PPP	billion US$2005/yr	8.27545	8.87668	9.40399	10.2117	11.3074	12.5883	13.9399	15.2943	16.6189	17.914	19.1884	20.4726	21.7888	23.1474	24.5448	25.9729	27.4249	28.9045	30.4303
IIASA GDP	SSP4	GIN	GDP|PPP	billion US$2005/yr	8.27545	8.83644	9.33206	10.1606	11.4196	13.0551	14.9781	17.1137	19.4213	21.8968	24.5622	27.5035	30.8116	34.5563	38.7717	43.4778	48.6959	54.4699	60.8789
IIASA GDP	SSP5	GIN	GDP|PPP	billion US$2005/yr	8.27545	9.56589	11.6074	15.0632	20.2857	27.9203	38.5909	52.6942	70.2094	90.5611	112.77	136.319	161.159	187.31	214.639	242.836	271.527	301.229	335.525
OECD Env-Growth	SSP1	GIN	GDP|PPP	billion US$2005/yr	9.766	13.347	26.01	46.8	79.502	126.084	186.21	258.779	341.872	433.323	529.737	629.265	728.733	825.575	920.794	1013.67	1102.95	1187.88	1266.6
OECD Env-Growth	SSP2	GIN	GDP|PPP	billion US$2005/yr	9.766	13.521	25.584	41.833	63.253	89.87	123.679	165.552	216.266	276.169	345.111	423.995	512.607	610.316	717.338	833.893	959.853	1094.88	1238.18
OECD Env-Growth	SSP3	GIN	GDP|PPP	billion US$2005/yr	9.766	13.725	25.427	38.439	52.7	67.256	83.634	102.042	122.572	144.919	168.745	194.19	221.274	249.589	278.88	308.909	339.618	370.927	403.314
OECD Env-Growth	SSP4	GIN	GDP|PPP	billion US$2005/yr	9.766	13.649	24.859	36.424	48.143	58.726	69.852	81.689	94.309	107.488	121.022	135.298	150.417	166.192	182.544	199.504	217.204	235.756	255.59
OECD Env-Growth	SSP5	GIN	GDP|PPP	billion US$2005/yr	9.766	13.271	25.976	48.645	86.861	142.676	212.346	292.951	381.682	476.177	572.823	672.328	772.314	871.661	975.16	1083.25	1196.67	1316.25	1440.84
IIASA GDP	SSP1	GMB	GDP|PPP	billion US$2005/yr	2.50839	3.87784	5.43301	7.23098	9.42059	11.9063	14.8122	18.2582	22.3664	27.0523	32.1285	37.3705	42.6011	47.6551	52.4151	56.7987	60.7555	64.2357	67.1891
IIASA GDP	SSP2	GMB	GDP|PPP	billion US$2005/yr	2.50839	3.82716	5.14854	6.48454	7.97375	9.68741	11.672	13.9402	16.4914	19.3207	22.3906	25.6542	29.225	33.1941	37.5887	42.3361	47.3497	52.5077	57.6667
IIASA GDP	SSP3	GMB	GDP|PPP	billion US$2005/yr	2.50839	3.78132	4.88728	5.78595	6.59834	7.36935	8.09139	8.75787	9.35479	9.91546	10.4534	10.9725	11.4795	11.9735	12.4575	12.9362	13.4187	13.9098	14.4036
IIASA GDP	SSP4	GMB	GDP|PPP	billion US$2005/yr	2.50839	3.75928	4.86558	5.8209	6.78566	7.81585	8.92648	10.1214	11.3912	12.7751	14.2869	15.9252	17.6938	19.589	21.6163	23.7881	26.1268	28.6464	31.3377
IIASA GDP	SSP5	GMB	GDP|PPP	billion US$2005/yr	2.50839	3.87767	5.47488	7.42396	9.96309	13.0887	16.9965	21.8612	27.8474	34.8783	42.7204	51.0836	59.7079	68.3267	76.7232	84.7378	93.1101	102.613	113.611
OECD Env-Growth	SSP1	GMB	GDP|PPP	billion US$2005/yr	3.169	4.073	5.269	7.194	10.163	14.433	20.194	27.615	36.807	47.819	60.511	74.646	89.835	105.617	121.922	138.534	155.108	171.334	186.717
OECD Env-Growth	SSP2	GMB	GDP|PPP	billion US$2005/yr	3.169	4.124	5.387	7.207	9.662	12.751	16.694	21.614	27.68	35.06	43.884	54.287	66.333	80.023	95.427	112.629	131.623	152.326	174.51
OECD Env-Growth	SSP3	GMB	GDP|PPP	billion US$2005/yr	3.169	4.162	5.472	7.158	9.141	11.318	13.835	16.712	19.964	23.624	27.694	32.191	37.157	42.564	48.404	54.684	61.417	68.642	76.337
OECD Env-Growth	SSP4	GMB	GDP|PPP	billion US$2005/yr	3.169	4.156	5.437	7.007	8.796	10.588	12.539	14.644	16.894	19.299	21.846	24.559	27.465	30.539	33.773	37.183	40.789	44.639	48.746
OECD Env-Growth	SSP5	GMB	GDP|PPP	billion US$2005/yr	3.169	4.066	5.254	7.301	10.765	16.115	23.539	33.279	45.504	60.321	77.606	97.25	118.895	142.098	167.041	193.598	221.516	250.561	280.14
IIASA GDP	SSP1	GNB	GDP|PPP	billion US$2005/yr	1.25409	1.76506	2.24846	2.91503	3.74797	4.84826	6.21181	7.903	10.0114	12.6497	15.8617	19.6194	23.8344	28.3459	32.9719	37.539	41.9157	46.0048	49.7486
IIASA GDP	SSP2	GNB	GDP|PPP	billion US$2005/yr	1.25409	1.72563	2.10195	2.56494	3.0901	3.74278	4.50627	5.44043	6.57451	7.94744	9.55713	11.4158	13.5335	16.0238	18.9371	22.2804	26.0244	30.1361	34.5637
IIASA GDP	SSP3	GNB	GDP|PPP	billion US$2005/yr	1.25409	1.68318	1.94506	2.21253	2.45834	2.71519	2.94775	3.17957	3.40795	3.64948	3.89658	4.15371	4.41469	4.68048	4.94622	5.2102	5.48048	5.75515	6.0451
IIASA GDP	SSP4	GNB	GDP|PPP	billion US$2005/yr	1.25409	1.67804	1.94232	2.22931	2.52768	2.87734	3.24883	3.67037	4.14268	4.68956	5.30575	5.99825	6.7588	7.5901	8.48696	9.44941	10.4953	11.6253	12.8656
IIASA GDP	SSP5	GNB	GDP|PPP	billion US$2005/yr	1.25409	1.76534	2.26825	3.00271	3.99195	5.38737	7.23765	9.67699	12.8735	17.0376	22.2955	28.664	36.0385	44.164	52.7134	61.357	69.8309	78.7766	88.931
OECD Env-Growth	SSP1	GNB	GDP|PPP	billion US$2005/yr	1.612	1.991	2.481	3.433	5.105	7.825	11.835	17.435	24.827	34.151	45.391	58.4	72.836	88.266	104.509	121.232	138.065	154.671	170.556
OECD Env-Growth	SSP2	GNB	GDP|PPP	billion US$2005/yr	1.612	2.016	2.518	3.341	4.581	6.32	8.718	11.943	16.16	21.543	28.246	36.418	46.161	57.51	70.509	85.149	101.48	119.441	138.869
OECD Env-Growth	SSP3	GNB	GDP|PPP	billion US$2005/yr	1.612	2.033	2.54	3.232	4.111	5.147	6.403	7.921	9.704	11.76	14.071	16.659	19.504	22.606	25.917	29.398	33.067	36.869	40.859
OECD Env-Growth	SSP4	GNB	GDP|PPP	billion US$2005/yr	1.612	2.031	2.527	3.176	3.969	4.825	5.809	6.944	8.216	9.618	11.125	12.749	14.472	16.289	18.17	20.097	22.094	24.137	26.285
OECD Env-Growth	SSP5	GNB	GDP|PPP	billion US$2005/yr	1.612	1.989	2.487	3.552	5.602	9.175	14.609	22.366	32.796	46.183	62.629	82.112	104.326	128.834	155.591	184.281	214.511	245.906	277.759
IIASA GDP	SSP1	GNQ	GDP|PPP	billion US$2005/yr	13.931	18.8796	21.7894	24.4468	27.5546	31.7508	37.0319	43.052	49.3847	55.9407	62.7203	69.6332	76.5628	83.3433	89.8524	96.0195	101.825	107.193	112.043
IIASA GDP	SSP2	GNQ	GDP|PPP	billion US$2005/yr	13.931	18.86	21.5866	24.7521	28.4221	32.6655	37.5706	43.1673	49.2522	55.7368	62.7865	70.37	78.3494	86.5586	94.8827	103.162	111.311	119.157	126.589
IIASA GDP	SSP3	GNQ	GDP|PPP	billion US$2005/yr	13.931	18.7209	20.9643	23.5189	26.407	29.6835	33.3889	37.5208	41.9834	46.4009	50.7807	55.2937	59.9438	64.7098	69.5164	74.3651	79.2699	84.2141	89.2232
IIASA GDP	SSP4	GNQ	GDP|PPP	billion US$2005/yr	13.931	18.711	20.9823	23.5658	26.4995	29.8437	33.6406	37.6173	41.858	46.0515	50.2874	54.7036	59.2171	63.7169	68.1253	72.4347	76.6492	80.7327	84.6968
IIASA GDP	SSP5	GNQ	GDP|PPP	billion US$2005/yr	13.931	18.9661	22.2282	26.0818	30.654	36.0639	42.466	51.0623	60.907	71.8295	83.7058	96.3589	109.583	123.084	136.618	150.009	163.159	175.881	187.958
OECD Env-Growth	SSP1	GNQ	GDP|PPP	billion US$2005/yr	21.538	25.047	27.725	33.819	40.671	48.439	57.001	66.215	75.737	85.269	94.775	103.906	112.331	119.627	126.042	131.472	135.909	139.414	141.89
OECD Env-Growth	SSP2	GNQ	GDP|PPP	billion US$2005/yr	21.538	25.351	27.974	33.416	39.15	45.328	52.177	59.679	67.726	76.231	85.282	94.671	104.242	113.674	122.936	131.936	140.711	149.14	157.147
OECD Env-Growth	SSP3	GNQ	GDP|PPP	billion US$2005/yr	21.538	25.427	27.913	32.544	36.971	41.298	45.755	50.391	55.058	59.603	64.116	68.643	73.033	77.296	81.317	85.127	88.738	92.159	95.435
OECD Env-Growth	SSP4	GNQ	GDP|PPP	billion US$2005/yr	21.538	25.561	28.343	33.611	39.413	45.641	52.434	59.883	67.871	76.263	85.225	94.811	104.864	115.41	126.284	137.451	148.878	160.538	172.485
OECD Env-Growth	SSP5	GNQ	GDP|PPP	billion US$2005/yr	21.538	25.171	28.174	35.194	43.805	54.315	66.478	80.191	95.113	110.908	127.567	144.617	161.582	177.75	193.212	207.827	221.448	234.079	245.411
IIASA GDP	SSP1	GRC	GDP|PPP	billion US$2005/yr	293.166	347.482	393.593	455.913	530.63	610.742	691.181	768.567	840.902	908.014	970.22	1026.45	1075.14	1115.65	1150.29	1180.66	1208.67	1235.72	1262.14
IIASA GDP	SSP2	GRC	GDP|PPP	billion US$2005/yr	293.166	347.764	393.072	452.211	521.019	592.953	663.601	729.839	789.508	842.805	890.779	933.226	970.261	1002.59	1032.06	1060.18	1088.22	1116.14	1142.33
IIASA GDP	SSP3	GRC	GDP|PPP	billion US$2005/yr	293.166	319.577	316.495	316.208	325.066	338.433	353.275	366.633	376.24	382.176	385.33	386.356	385.813	383.958	381.322	378.413	375.688	372.94	369.586
IIASA GDP	SSP4	GRC	GDP|PPP	billion US$2005/yr	293.166	347.985	391.779	446.21	506.103	565.656	621.268	670.075	709.837	741.981	768.629	790.507	808.052	820.98	829.992	836.197	841.509	846.175	848.603
IIASA GDP	SSP5	GRC	GDP|PPP	billion US$2005/yr	293.166	348.592	398.2	468.362	557.405	659.515	769.936	885.407	1003.79	1124.74	1248.84	1374.84	1500.07	1623.22	1746.57	1871.99	2001.59	2137.34	2280.51
OECD Env-Growth	SSP1	GRC	GDP|PPP	billion US$2005/yr	273.897	257.171	291.041	326.023	371.051	421.763	472.882	521.722	568.636	616.181	665.309	714.153	759.733	799.739	836.03	868.743	898.836	926.525	950.939
OECD Env-Growth	SSP2	GRC	GDP|PPP	billion US$2005/yr	273.897	256.692	288.606	317.214	350.336	385.165	421.383	458.216	496.953	539.131	584.913	632.138	678.866	723.191	766.559	809.685	853.046	895.922	936.547
OECD Env-Growth	SSP3	GRC	GDP|PPP	billion US$2005/yr	273.897	255.345	284.101	304.339	323.913	339.383	351.402	359.634	366.269	372.574	379.044	384.478	387.291	386.514	384.311	381.076	377.41	372.998	366.668
OECD Env-Growth	SSP4	GRC	GDP|PPP	billion US$2005/yr	273.897	256.19	288.179	319.924	360.08	403.24	443.995	480.921	516.057	550.727	585.701	618.724	647.608	670.832	691.185	709.408	726.697	742.708	754.933
OECD Env-Growth	SSP5	GRC	GDP|PPP	billion US$2005/yr	273.897	258.094	294.771	339.621	401.744	476.172	555.538	638.931	728.258	827.746	939.981	1063.32	1195.46	1334.25	1480.51	1634.04	1795.91	1966.57	2146.82
IIASA GDP	SSP1	GRD	GDP|PPP	billion US$2005/yr	1.28653	1.27461	1.29552	1.38036	1.51075	1.67625	1.8582	2.04363	2.21963	2.38345	2.53272	2.66268	2.77534	2.88674	3.00561	3.13248	3.25892	3.37512	3.47859
IIASA GDP	SSP2	GRD	GDP|PPP	billion US$2005/yr	1.28653	1.28748	1.33475	1.44347	1.59765	1.78111	1.97266	2.1675	2.36462	2.56815	2.77909	2.99345	3.20322	3.39919	3.5834	3.7721	3.97909	4.2126	4.4714
IIASA GDP	SSP3	GRD	GDP|PPP	billion US$2005/yr	1.28653	1.28548	1.32727	1.42091	1.56338	1.73585	1.91203	2.06561	2.19585	2.3088	2.42979	2.56942	2.72973	2.89929	3.07454	3.2592	3.46328	3.69455	3.95747
IIASA GDP	SSP4	GRD	GDP|PPP	billion US$2005/yr	1.28653	1.26994	1.26489	1.27482	1.30145	1.34387	1.39247	1.43041	1.45495	1.46655	1.47773	1.49184	1.5074	1.51792	1.52287	1.52433	1.52581	1.52994	1.53555
IIASA GDP	SSP5	GRD	GDP|PPP	billion US$2005/yr	1.28653	1.26774	1.2729	1.32846	1.43267	1.57993	1.7512	1.9245	2.08338	2.22633	2.35759	2.49458	2.64766	2.82084	3.00987	3.21124	3.41994	3.63196	3.84736
IIASA GDP	SSP1	GTM	GDP|PPP	billion US$2005/yr	83.4884	114.157	145.647	181.681	220.889	262.792	307.304	353.778	402.946	452.664	506.23	561.675	616.569	667.336	718.244	772.566	830.995	891.182	949.53
IIASA GDP	SSP2	GTM	GDP|PPP	billion US$2005/yr	83.4884	111.526	136.899	164.863	196.44	232.114	272.081	316.809	366.222	420.035	476.997	537.395	601.652	669.651	741.402	829.789	930.508	1039.19	1150.69
IIASA GDP	SSP3	GTM	GDP|PPP	billion US$2005/yr	83.4884	109.621	131.146	154.152	180.117	208.839	239.466	271.701	304.763	339.099	375.216	413.928	455.638	500.439	548.196	598.412	651.305	707.016	766.197
IIASA GDP	SSP4	GTM	GDP|PPP	billion US$2005/yr	83.4884	109.069	129.391	150.236	173.522	199.375	227.741	258.807	292.208	328.553	368.355	412.311	460.661	513.467	570.669	632	697.871	768.553	844.791
IIASA GDP	SSP5	GTM	GDP|PPP	billion US$2005/yr	83.4884	114.06	145.742	182.708	224.257	270.304	320.93	375.346	434.14	494.578	560.583	629.854	706.776	793.542	892.603	1002.67	1121.04	1244.35	1368.14
OECD Env-Growth	SSP1	GTM	GDP|PPP	billion US$2005/yr	61.823	70.38	84.241	109.473	145.955	195.437	257.775	333.263	421.044	519.802	626.124	737.7	850.799	962.727	1075.97	1188.19	1296.08	1397.95	1490.79
OECD Env-Growth	SSP2	GTM	GDP|PPP	billion US$2005/yr	61.823	71.472	85.517	107.494	135.968	170.35	212.341	263.332	324.489	396.543	479.65	575.129	683.539	805.112	940.754	1090.77	1254.34	1430.37	1617.8
OECD Env-Growth	SSP3	GTM	GDP|PPP	billion US$2005/yr	61.823	72.439	86.842	105.867	128.527	153.325	181.687	214.166	251.027	292.451	338.475	389.902	447.309	511.061	581.198	657.459	740.356	830.06	927.166
OECD Env-Growth	SSP4	GTM	GDP|PPP	billion US$2005/yr	61.823	72.278	85.768	102.481	122.076	141.898	163.4	186.857	212.27	239.595	268.675	300.186	334.471	371.711	411.864	454.854	501.165	551.15	605.498
OECD Env-Growth	SSP5	GTM	GDP|PPP	billion US$2005/yr	61.823	70.192	83.758	110.407	152.612	213.98	292.89	389.647	503.323	632.529	773.33	924.37	1081.79	1243.21	1414.36	1592.97	1775.99	1962.2	2148.13
IIASA GDP	SSP1	GUY	GDP|PPP	billion US$2005/yr	3.26531	3.68514	4.13247	4.67793	5.4035	6.27833	7.24393	8.21776	9.16173	10.0141	10.7298	11.3155	11.8158	12.2554	12.6333	12.9348	13.1438	13.2889	13.4649
IIASA GDP	SSP2	GUY	GDP|PPP	billion US$2005/yr	3.26531	3.69033	4.03745	4.42394	4.93373	5.56211	6.25142	6.95781	7.68355	8.40872	9.11105	9.799	10.4981	11.2232	11.9705	12.7273	13.4754	14.2191	14.9773
IIASA GDP	SSP3	GUY	GDP|PPP	billion US$2005/yr	3.26531	3.70153	4.05127	4.38378	4.84965	5.43226	6.05321	6.64597	7.23128	7.81757	8.40201	8.97731	9.54324	10.1218	10.7461	11.4375	12.1996	13.0328	13.9447
IIASA GDP	SSP4	GUY	GDP|PPP	billion US$2005/yr	3.26531	3.65909	3.90079	4.03403	4.22726	4.49786	4.80463	5.08765	5.3454	5.57437	5.77496	5.96183	6.15235	6.35172	6.55386	6.74689	6.9192	7.06762	7.20094
IIASA GDP	SSP5	GUY	GDP|PPP	billion US$2005/yr	3.26531	3.66914	4.09793	4.61611	5.31147	6.16104	7.1161	8.07591	8.96367	9.69623	10.2278	10.5976	10.8689	11.0834	11.3771	11.8335	12.4761	13.2755	14.198
OECD Env-Growth	SSP1	GUY	GDP|PPP	billion US$2005/yr	2.342	3.012	3.685	4.584	5.653	6.963	8.478	10.246	12.217	14.263	16.111	17.701	19.238	20.903	22.503	23.948	25.192	26.29	27.303
OECD Env-Growth	SSP2	GUY	GDP|PPP	billion US$2005/yr	2.342	3.029	3.695	4.462	5.197	5.925	6.734	7.711	8.857	10.109	11.34	12.578	13.994	15.701	17.559	19.511	21.534	23.685	26.046
OECD Env-Growth	SSP3	GUY	GDP|PPP	billion US$2005/yr	2.342	3.068	3.793	4.582	5.273	5.87	6.483	7.2	8.032	8.921	9.773	10.628	11.645	12.897	14.264	15.698	17.185	18.777	20.568
OECD Env-Growth	SSP4	GUY	GDP|PPP	billion US$2005/yr	2.342	3.02	3.634	4.301	4.98	5.677	6.442	7.348	8.397	9.526	10.595	11.601	12.689	13.961	15.268	16.539	17.749	18.944	20.173
OECD Env-Growth	SSP5	GUY	GDP|PPP	billion US$2005/yr	2.342	2.988	3.61	4.491	5.654	7.153	8.831	10.694	12.657	14.577	16.165	17.421	18.528	19.719	20.956	22.208	23.406	24.612	25.927
IIASA GDP	SSP1	HKG	GDP|PPP	billion US$2005/yr	256.052	288.511	313.717	340.537	377.294	423.556	475.045	527.047	575.545	618.47	655.577	684.144	703.117	713.816	717.782	714.613	703.529	685.128	660.815
IIASA GDP	SSP2	HKG	GDP|PPP	billion US$2005/yr	256.052	289.053	314.897	341.946	378.539	424.333	475.521	528.022	578.439	625.102	668.368	707.164	740.433	768.103	790.501	807.569	818.346	823.122	822.647
IIASA GDP	SSP3	HKG	GDP|PPP	billion US$2005/yr	256.052	282.23	295.215	304.993	322.279	346.796	375.861	407.207	438.525	468.15	496.825	525.19	553.539	582.402	612.025	642.043	672.094	702.261	732.205
IIASA GDP	SSP4	HKG	GDP|PPP	billion US$2005/yr	256.052	287.762	309.865	330.138	356.597	388.953	423.27	455.594	482.919	504.796	522.85	537.523	548.938	557.094	561.837	562.591	558.281	548.885	534.942
IIASA GDP	SSP5	HKG	GDP|PPP	billion US$2005/yr	256.052	289.786	319.689	356.854	410.477	480.891	563.166	651.039	738.827	823.767	904.323	975.264	1033.92	1081.15	1118.36	1143.92	1155.18	1150.98	1132.38
OECD Env-Growth	SSP1	HKG	GDP|PPP	billion US$2005/yr	294.826	351.593	420.817	481.366	540.342	600.659	656.412	703.613	740.42	769.141	792.529	809.027	817.317	815.011	805.059	788.171	765.884	739.412	708.923
OECD Env-Growth	SSP2	HKG	GDP|PPP	billion US$2005/yr	294.826	352.012	421.252	480.012	536.305	594.648	651.481	703.784	750.41	793.405	835.299	874.294	909.632	938.126	959.086	973.378	980.523	981.52	977.787
OECD Env-Growth	SSP3	HKG	GDP|PPP	billion US$2005/yr	294.826	350.299	413.258	455.097	484.952	510.714	532.097	548.331	559.982	569.105	577.141	586.268	598.779	611.096	620.372	627.241	631.629	634.328	637.153
OECD Env-Growth	SSP4	HKG	GDP|PPP	billion US$2005/yr	294.826	351.211	419.179	475.289	528.469	580.906	628.606	669.526	703.879	734.766	765.052	791.989	814.236	828.978	837.012	838.966	834.675	824.647	809.217
OECD Env-Growth	SSP5	HKG	GDP|PPP	billion US$2005/yr	294.826	353.518	429.793	510.051	599.855	700.864	803.301	901.925	992.708	1076.74	1157.51	1228.84	1285.46	1325.12	1354.38	1371.77	1379.01	1376.88	1363.04
IIASA GDP	SSP1	HND	GDP|PPP	billion US$2005/yr	28.2623	34.7611	44.0594	55.1672	67.7698	81.7654	97.1997	113.754	131.818	150.784	169.638	191.329	214.928	238.192	258.14	273.921	285.871	296.608	307.487
IIASA GDP	SSP2	HND	GDP|PPP	billion US$2005/yr	28.2623	33.9638	41.1337	49.0444	57.8784	67.7711	78.8245	91.0207	104.449	119.273	135.529	153.444	173.172	194.513	217.12	240.4	269.201	301.781	334.923
IIASA GDP	SSP3	HND	GDP|PPP	billion US$2005/yr	28.2623	33.2089	38.658	44.1293	49.9589	56.0437	62.1054	68.0002	73.6299	79.333	85.4214	92.1496	99.5893	107.661	116.19	125.013	134.234	143.997	154.476
IIASA GDP	SSP4	HND	GDP|PPP	billion US$2005/yr	28.2623	33.0676	38.2788	43.4087	48.9822	55.0273	61.4718	68.252	75.3067	83.0022	91.7001	101.674	112.986	125.571	139.271	153.982	169.903	187.275	206.369
IIASA GDP	SSP5	HND	GDP|PPP	billion US$2005/yr	28.2623	34.7365	44.1618	55.7581	69.4953	85.4644	103.842	124.306	147.245	171.887	196.931	225.964	257.862	289.817	322.115	357.041	395.974	437.949	481.109
OECD Env-Growth	SSP1	HND	GDP|PPP	billion US$2005/yr	26.744	31.172	37.385	47.531	62.881	84.158	111.469	144.95	183.986	227.894	275.427	325.793	377.605	429.512	481.919	533.566	583.407	630.264	672.458
OECD Env-Growth	SSP2	HND	GDP|PPP	billion US$2005/yr	26.744	31.506	38.096	47.465	59.623	74.338	92.514	114.549	140.747	171.423	206.745	247.322	293.4	345.116	402.767	466.165	534.942	608.928	687.651
OECD Env-Growth	SSP3	HND	GDP|PPP	billion US$2005/yr	26.744	31.874	39.091	48.067	58.08	68.764	80.953	94.71	110.063	126.967	145.415	165.821	188.444	213.332	240.297	269.242	300.434	334.033	370.259
OECD Env-Growth	SSP4	HND	GDP|PPP	billion US$2005/yr	26.744	31.807	38.757	46.803	55.481	63.83	72.862	82.576	92.975	104	115.63	128.23	141.981	156.92	172.922	189.998	208.418	228.394	250.192
OECD Env-Growth	SSP5	HND	GDP|PPP	billion US$2005/yr	26.744	31.091	37.18	47.996	66.002	92.608	127.413	170.654	221.686	279.81	343.666	412.905	486.134	562.126	642.385	725.561	810.862	897.19	982.48
IIASA GDP	SSP1	HRV	GDP|PPP	billion US$2005/yr	67.7107	78.6844	87.0546	95.6511	103.745	111.301	118.014	123.782	128.729	133.529	138.713	144.249	149.884	155.257	159.851	163.172	165.065	165.706	164.987
IIASA GDP	SSP2	HRV	GDP|PPP	billion US$2005/yr	67.7107	78.9711	87.3496	95.3791	102.521	109.201	115.491	121.544	127.272	132.991	139.065	145.494	152.068	158.571	164.872	170.909	176.717	182.399	187.985
IIASA GDP	SSP3	HRV	GDP|PPP	billion US$2005/yr	67.7107	79.0018	86.9922	93.9506	99.4698	104.23	108.524	112.765	117.109	121.625	126.507	131.936	138.018	144.888	152.627	161.249	170.713	181.011	192.112
IIASA GDP	SSP4	HRV	GDP|PPP	billion US$2005/yr	67.7107	78.6602	85.8637	91.5621	95.3432	98.0747	100.087	101.606	102.533	103.006	103.289	103.469	103.494	103.367	103.066	102.566	101.867	100.977	99.8548
IIASA GDP	SSP5	HRV	GDP|PPP	billion US$2005/yr	67.7107	78.8155	87.9393	98.3447	109.41	120.918	132.254	143.577	155.378	168.272	182.603	198.007	214.013	229.991	245.075	258.34	269.29	277.902	283.757
OECD Env-Growth	SSP1	HRV	GDP|PPP	billion US$2005/yr	71.255	73.758	81.775	89.86	99.485	110.291	120.707	129.561	136.685	142.914	148.485	153.079	156.492	158.224	158.617	157.963	156.529	154.37	151.091
OECD Env-Growth	SSP2	HRV	GDP|PPP	billion US$2005/yr	71.255	73.795	81.696	88.661	95.724	102.911	109.931	116.277	122.113	128.09	134.353	140.6	146.745	152.28	157.22	161.774	166.103	170.301	174.327
OECD Env-Growth	SSP3	HRV	GDP|PPP	billion US$2005/yr	71.255	73.779	81.379	86.807	91.083	94.326	96.966	98.788	100.21	101.947	104.17	106.859	110.037	113.321	116.534	119.735	123.074	126.657	130.536
OECD Env-Growth	SSP4	HRV	GDP|PPP	billion US$2005/yr	71.255	73.626	81.232	88.507	96.998	106.087	114.546	121.718	127.904	133.912	139.882	145.19	149.618	152.648	154.617	155.838	156.56	156.858	156.516
OECD Env-Growth	SSP5	HRV	GDP|PPP	billion US$2005/yr	71.255	73.81	82.138	92.146	105.414	121.358	137.597	152.94	167.075	180.931	194.83	208.088	220.138	230.234	238.759	245.989	252.2	257.35	260.584
IIASA GDP	SSP1	HTI	GDP|PPP	billion US$2005/yr	14.1159	16.9459	21.7474	28.8846	38.3139	49.88	63.592	78.7503	96.9239	118.387	142.546	167.477	191.719	214.013	233.549	249.94	263.186	273.541	281.305
IIASA GDP	SSP2	HTI	GDP|PPP	billion US$2005/yr	14.1159	16.7979	20.8773	26.4679	33.3867	41.4544	50.6643	60.6868	71.3148	82.7945	97.084	114.38	133.999	154.541	175.172	195.306	214.699	233.368	251.454
IIASA GDP	SSP3	HTI	GDP|PPP	billion US$2005/yr	14.1159	16.5486	19.7189	23.559	27.8381	32.3301	36.8288	41.0221	44.7502	48.1786	51.5513	55.0207	58.6979	62.5792	66.6528	70.8912	75.3388	80.0263	85.0639
IIASA GDP	SSP4	HTI	GDP|PPP	billion US$2005/yr	14.1159	16.4414	19.4666	23.1084	27.2596	31.8124	36.7508	41.8532	46.9885	52.3273	58.1165	64.5233	71.6767	79.6055	88.327	97.8651	108.328	119.784	132.402
IIASA GDP	SSP5	HTI	GDP|PPP	billion US$2005/yr	14.1159	16.9103	21.7081	28.9596	38.8426	51.4585	67.07	85.0423	107.343	134.269	164.883	196.648	227.699	256.538	282.234	307.184	334.838	367.411	405.109
OECD Env-Growth	SSP1	HTI	GDP|PPP	billion US$2005/yr	9.918	12.949	16.94	23.729	34.72	51.334	74.401	104.345	141.007	184.213	233.017	286.336	342.48	399.442	456.969	513.367	567.28	617.87	663.647
OECD Env-Growth	SSP2	HTI	GDP|PPP	billion US$2005/yr	9.918	13.013	16.97	22.832	30.813	41.119	54.568	71.577	92.46	117.693	147.379	181.856	221.216	265.262	314.001	366.93	423.642	483.791	547.016
OECD Env-Growth	SSP3	HTI	GDP|PPP	billion US$2005/yr	9.918	13.142	17.278	22.665	28.942	35.745	43.7	52.722	62.784	74.062	86.579	100.458	115.86	132.783	151.182	170.838	191.758	213.865	237.34
OECD Env-Growth	SSP4	HTI	GDP|PPP	billion US$2005/yr	9.918	13.09	16.99	21.728	26.908	31.85	37.256	43.019	49.097	55.591	62.416	69.635	77.374	85.61	94.289	103.384	112.945	123.021	133.823
OECD Env-Growth	SSP5	HTI	GDP|PPP	billion US$2005/yr	9.918	12.891	16.807	24.042	36.785	57.015	85.209	121.751	166.317	218.772	278.129	343.764	413.882	486.741	563.744	643.317	724.73	807.857	891.204
IIASA GDP	SSP1	HUN	GDP|PPP	billion US$2005/yr	165.329	183.597	205.268	233.704	261.112	285.362	306.025	325.16	343.917	363.881	385.297	407.677	430.298	452.69	474.649	496.011	516.918	537.441	557.854
IIASA GDP	SSP2	HUN	GDP|PPP	billion US$2005/yr	165.329	183.98	204.915	230.638	253.65	272.986	289.206	303.848	317.766	332.05	346.854	361.523	375.406	388.511	401.248	414.026	427.245	440.977	455.064
IIASA GDP	SSP3	HUN	GDP|PPP	billion US$2005/yr	165.329	183.472	201.81	221.726	235.863	244.466	249.041	250.895	250.833	250.04	248.682	246.521	243.607	240.21	236.625	233.074	229.694	226.401	223.067
IIASA GDP	SSP4	HUN	GDP|PPP	billion US$2005/yr	165.329	183.894	203.741	226.826	245.546	259.756	270.702	279.665	287.277	294.694	301.993	308.546	313.883	317.908	320.864	323.108	325.128	326.963	328.442
IIASA GDP	SSP5	HUN	GDP|PPP	billion US$2005/yr	165.329	184.185	208.451	243.022	280.875	319.406	358.612	400.71	447.07	499.521	559.029	625.554	698.349	777.055	861.635	952.136	1049.01	1152.85	1264.62
OECD Env-Growth	SSP1	HUN	GDP|PPP	billion US$2005/yr	169.548	177.954	193.977	216.887	245.242	276.269	305.884	334.326	362.479	390.093	418.867	448.976	477.688	505.233	532.985	559.697	584.937	609.062	632.169
OECD Env-Growth	SSP2	HUN	GDP|PPP	billion US$2005/yr	169.548	177.622	192.69	213.075	237.053	263.104	288.85	315.068	342.692	370.866	400.618	431.826	462.134	491.841	522.384	552.827	582.926	612.81	642.587
OECD Env-Growth	SSP3	HUN	GDP|PPP	billion US$2005/yr	169.548	176.679	188.751	203.737	218.954	232.8	243.599	252.247	259.468	264.582	268.779	272.158	272.851	271.564	269.769	266.79	263.091	258.851	253.781
OECD Env-Growth	SSP4	HUN	GDP|PPP	billion US$2005/yr	169.548	177.283	192.026	213.398	239.108	266.246	290.747	313.78	336.538	358.327	380.573	402.901	422.441	439.63	456.339	471.513	485.632	498.87	510.632
OECD Env-Growth	SSP5	HUN	GDP|PPP	billion US$2005/yr	169.548	178.594	196.613	225.525	263.614	307.591	353.06	401.713	455.542	515.043	582.938	660.149	744.345	836.351	937.784	1047.24	1164.11	1289.63	1425.72
IIASA GDP	SSP1	IDN	GDP|PPP	billion US$2005/yr	978.828	1412.64	2094.4	2968.93	3872.29	4716.2	5594.17	6504.96	7403.37	8195.45	8852.21	9420.37	9950.32	10461	10945.3	11391.1	11786.9	12122.4	12387.3
IIASA GDP	SSP2	IDN	GDP|PPP	billion US$2005/yr	978.828	1410.93	2071.41	2894.22	3724.89	4503	5214.78	5862.9	6608.25	7434.5	8265.99	8989.25	9621.83	10206.5	10776.6	11338.8	11891.5	12425.6	12935.1
IIASA GDP	SSP3	IDN	GDP|PPP	billion US$2005/yr	978.828	1412.25	2059.42	2833.15	3560.75	4198.6	4758.11	5272.38	5768.88	6273	6752.77	7183.74	7549.91	7872.57	8171.06	8463.28	8762.12	9075.98	9422.66
IIASA GDP	SSP4	IDN	GDP|PPP	billion US$2005/yr	978.828	1402.01	2014.85	2706.21	3295.53	3751.45	4102.64	4386.58	4633.04	4858.82	5031.57	5125.79	5129.51	5064.59	4962.42	4843.12	4713.86	4575.99	4425.9
IIASA GDP	SSP5	IDN	GDP|PPP	billion US$2005/yr	978.828	1413.79	2108.62	3027.76	4025.61	5017.56	6101.71	7272.6	8470.81	9612.55	10731	11863.3	13028	14204.5	15368.8	16496.8	17567.4	18559.9	19451.7
OECD Env-Growth	SSP1	IDN	GDP|PPP	billion US$2005/yr	929.865	1262.3	1752.64	2465.62	3417.52	4637.53	6051.91	7554.43	9086.7	10617.6	12099.5	13477.6	14682.9	15710.2	16581.4	17294.6	17857.9	18279.2	18550.5
OECD Env-Growth	SSP2	IDN	GDP|PPP	billion US$2005/yr	929.865	1266.78	1751.52	2364.56	3044.99	3783.11	4599.04	5456.45	6334.96	7237.84	8153.69	9065.75	9952.26	10823.8	11685.5	12535.4	13370.4	14189	14987.2
OECD Env-Growth	SSP3	IDN	GDP|PPP	billion US$2005/yr	929.865	1271.18	1757.14	2313.37	2843.92	3315.37	3769.18	4179.36	4534.45	4849.11	5127.83	5373.42	5586.98	5783.99	5966.93	6137.14	6299.96	6458.52	6619.39
OECD Env-Growth	SSP4	IDN	GDP|PPP	billion US$2005/yr	929.865	1260.97	1730.75	2316.57	2979.94	3700.59	4481.02	5271.98	6044.95	6799.38	7521.64	8182.33	8753.25	9242.69	9668.9	10033.9	10342.6	10598.2	10794.7
OECD Env-Growth	SSP5	IDN	GDP|PPP	billion US$2005/yr	929.865	1261.48	1759.81	2553.76	3722.48	5313.94	7214.56	9309.2	11506.8	13771	16050.7	18282.1	20372.3	22314.6	24136.6	25829.2	27393.8	28830.1	30109.7
IIASA GDP	SSP1	IND	GDP|PPP	billion US$2005/yr	3885.4	6500.86	10511.4	15769.3	21326.1	26567.3	31373.3	35786.1	39869.2	43569.8	46770.8	49442.9	51847.9	54133.2	56311.6	58261.1	59856.6	60995.6	61624.9
IIASA GDP	SSP2	IND	GDP|PPP	billion US$2005/yr	3885.4	6449.05	10137.4	14829.9	19713	24356.6	28592.9	32424.4	36081.3	39757.4	43518.8	47274	50897.6	54221.5	57216.8	60017.7	62720	65287.3	67649.8
IIASA GDP	SSP3	IND	GDP|PPP	billion US$2005/yr	3885.4	6407.67	9848.7	13938	17858.6	21276.6	24105.8	26446.8	28366.8	30022.2	31553.3	33068.3	34610.6	36185.7	37764.4	39331.5	40911.1	42514.7	44154.1
IIASA GDP	SSP4	IND	GDP|PPP	billion US$2005/yr	3885.4	6351.29	9625.01	13349.3	16666.8	19275.1	21177.4	22520.1	23396.3	23921.5	24204.9	24314.4	24278.3	24102.9	23817.2	23437.3	22986.1	22482.9	21916.9
IIASA GDP	SSP5	IND	GDP|PPP	billion US$2005/yr	3885.4	6507.97	10603.6	16172	22408.7	28729	34960.6	41057.2	46993.5	52720.9	58592.3	64834.6	71507.6	78386.5	85215.5	91719.1	97649.1	102792	106999
OECD Env-Growth	SSP1	IND	GDP|PPP	billion US$2005/yr	3653.1	4978.69	6913.94	9624.81	13287.6	18045.8	23739.6	30127.7	36896.7	43907	50962.1	57813.3	64146.9	69758.3	74746	79032.7	82536.7	85245.9	87096.5
OECD Env-Growth	SSP2	IND	GDP|PPP	billion US$2005/yr	3653.1	5016.98	6971.73	9403.75	12207.7	15398.4	19051.1	23112.7	27538.5	32332.8	37477.4	42904.3	48503.5	54182.6	59878.2	65534.1	71141.1	76662.3	81989.5
OECD Env-Growth	SSP3	IND	GDP|PPP	billion US$2005/yr	3653.1	5047.16	7025.45	9187.03	11288.5	13239.4	15183.2	17071.5	18892.2	20687.4	22487	24310	26142.1	27981.4	29790.3	31560.4	33334	35123.7	36935.6
OECD Env-Growth	SSP4	IND	GDP|PPP	billion US$2005/yr	3653.1	4999.23	6901.44	9162.56	11709.2	14493.2	17509.7	20647.3	23838.4	27082.1	30339.7	33501.1	36450.8	39125.6	41545.4	43704.4	45641.9	47371.2	48835.9
OECD Env-Growth	SSP5	IND	GDP|PPP	billion US$2005/yr	3653.1	4977.59	6946.39	9956.54	14398.4	20543	28108.6	36872.7	46498.3	56868	67787.1	78954.3	89931.8	100430	110570	120213	129183	137392	144647
IIASA GDP	SSP1	IRL	GDP|PPP	billion US$2005/yr	153.001	169.54	193.685	228.761	267.222	306.409	344.393	381.703	419.143	457.716	497.484	537.469	576.647	614.279	650.523	686.115	721.184	755.975	789.919
IIASA GDP	SSP2	IRL	GDP|PPP	billion US$2005/yr	153.001	169.636	193.417	226.954	262.476	297.549	330.53	361.963	392.53	423.219	454.222	484.778	514.192	542.543	570.533	598.894	627.914	657.392	686.379
IIASA GDP	SSP3	IRL	GDP|PPP	billion US$2005/yr	153.001	161.325	169.211	180.524	192.238	203.873	214.844	225.131	234.466	243.084	250.986	257.927	263.801	268.639	272.718	276.306	279.476	281.899	283.108
IIASA GDP	SSP4	IRL	GDP|PPP	billion US$2005/yr	153.001	170.371	194.932	228.289	261.592	292.683	320.785	346.679	370.656	393.605	415.832	436.804	455.959	472.815	487.369	500.011	511.371	521.76	530.612
IIASA GDP	SSP5	IRL	GDP|PPP	billion US$2005/yr	153.001	170.351	197.496	239.533	290.331	347.584	409.075	475.316	547.285	626.584	714.233	809.951	912.615	1021.31	1136.23	1258.49	1388.54	1527.25	1674.7
OECD Env-Growth	SSP1	IRL	GDP|PPP	billion US$2005/yr	160.981	179.159	202.161	226.063	253.288	281.902	310.235	337.369	364.787	394.635	427.575	462.528	497.912	531.259	564.309	597.628	631.53	666.046	700.225
OECD Env-Growth	SSP2	IRL	GDP|PPP	billion US$2005/yr	160.981	178.935	201.365	223.974	249.74	276.967	304.651	331.954	360.369	391.631	426.265	463.11	500.638	536.79	573.422	611.111	650.709	692.23	734.569
OECD Env-Growth	SSP3	IRL	GDP|PPP	billion US$2005/yr	160.981	177.514	196.578	212.992	230.465	246.301	259.304	268.74	276.408	283.834	291.359	297.991	302.425	303.455	303.438	302.918	302.394	301.64	299.656
OECD Env-Growth	SSP4	IRL	GDP|PPP	billion US$2005/yr	160.981	178.354	199.907	222.512	248.43	275.058	300.676	324.517	348.456	373.893	401.301	429.195	455.616	478.441	500.314	521.722	543.436	565.378	585.797
OECD Env-Growth	SSP5	IRL	GDP|PPP	billion US$2005/yr	160.981	180.422	206.675	237.556	275.087	318.026	364.76	415.211	471.655	537.276	614.139	702.232	801.099	908.326	1025.35	1153.75	1294.66	1449.38	1618.87
IIASA GDP	SSP1	IRN	GDP|PPP	billion US$2005/yr	806.777	956.598	1099.78	1218.59	1339.79	1486.57	1671.29	1888.93	2115.33	2326.35	2504.24	2637.76	2742.29	2831.43	2910.91	2968.54	2993.43	2989.13	2972.42
IIASA GDP	SSP2	IRN	GDP|PPP	billion US$2005/yr	806.777	956.831	1091.63	1197.19	1300.73	1426.68	1588.17	1783.85	1993.75	2198.29	2383.18	2539.9	2661.92	2747.15	2812.88	2876.2	2949.34	3037.14	3140.37
IIASA GDP	SSP3	IRN	GDP|PPP	billion US$2005/yr	806.777	957.469	1077.81	1151.94	1214.67	1279.22	1351.94	1442.33	1537.62	1629.41	1723.89	1827.39	1930.28	2020.11	2097.33	2176.81	2274.96	2397.12	2538.55
IIASA GDP	SSP4	IRN	GDP|PPP	billion US$2005/yr	806.777	948.469	1051.82	1101.21	1134.06	1166.26	1206.03	1261.15	1317.91	1365.68	1407.74	1447.56	1474.86	1475.79	1451.75	1416.1	1383.27	1359.78	1341.96
IIASA GDP	SSP5	IRN	GDP|PPP	billion US$2005/yr	806.777	957.472	1108.36	1246.53	1401.73	1597.88	1848.11	2146.54	2464.27	2770.37	3064.9	3365.49	3681.32	4002.66	4312.89	4584.56	4796.08	4950.02	5072.66
OECD Env-Growth	SSP1	IRN	GDP|PPP	billion US$2005/yr	810.315	853.623	974.08	1136.01	1342.3	1589.09	1855.48	2116.23	2352.01	2571.38	2798.73	3035.93	3253.71	3431.53	3575.59	3693.26	3794.09	3876.09	3922.77
OECD Env-Growth	SSP2	IRN	GDP|PPP	billion US$2005/yr	810.315	857.116	982.781	1159.76	1348.08	1563.88	1800.55	2031.06	2248.26	2463.85	2681.8	2918.78	3154.66	3374.41	3577.88	3775.28	3980.49	4197.1	4416.4
OECD Env-Growth	SSP3	IRN	GDP|PPP	billion US$2005/yr	810.315	862.017	987.99	1155.47	1328.13	1525.94	1734.26	1918.67	2070.01	2198.49	2324.77	2458.13	2567.57	2671.95	2772.16	2875.47	2990.23	3117.41	3253.02
OECD Env-Growth	SSP4	IRN	GDP|PPP	billion US$2005/yr	810.315	854.867	968.649	1132.78	1320.09	1549.49	1801.96	2038.75	2246.09	2432.37	2595.35	2754.18	2892.61	2999.51	3079.55	3144.84	3209.21	3277.23	3340.29
OECD Env-Growth	SSP5	IRN	GDP|PPP	billion US$2005/yr	810.315	853.203	980.012	1190.88	1472.21	1852.62	2293.79	2746.23	3179.41	3600.26	4041.13	4509.59	4948.49	5346.51	5711.44	6052.27	6382.39	6697.42	6967.27
IIASA GDP	SSP1	IRQ	GDP|PPP	billion US$2005/yr	136.305	238.68	416.18	667.629	933.708	1160.1	1343.45	1505.59	1666.1	1830.4	2001.95	2188.49	2396.66	2627.23	2876.37	3137.25	3401.48	3657.55	3892.49
IIASA GDP	SSP2	IRQ	GDP|PPP	billion US$2005/yr	136.305	237.653	404.798	638.066	893.143	1130.36	1340.75	1537.76	1733.76	1941.4	2165.67	2405.08	2662.82	2946.62	3260.05	3600.19	3958.95	4329.87	4705.95
IIASA GDP	SSP3	IRQ	GDP|PPP	billion US$2005/yr	136.305	231.148	367.93	541.394	720.782	888.253	1039.29	1184.54	1329.39	1481.9	1649.99	1838.25	2047.06	2274.46	2520.49	2784.01	3066.91	3370.88	3700.6
IIASA GDP	SSP4	IRQ	GDP|PPP	billion US$2005/yr	136.305	230.158	363.686	529.334	696.871	850.463	989.2	1125.5	1265.64	1417.66	1589.2	1783.92	2001.08	2237.88	2494.09	2768.94	3064.69	3383.09	3728.56
IIASA GDP	SSP5	IRQ	GDP|PPP	billion US$2005/yr	136.305	238.814	418.462	678.479	964.062	1221.19	1442.92	1647.79	1856.39	2092	2368.46	2691.97	3062.68	3477.89	3933.13	4420.59	4929.73	5444.07	5943.06
OECD Env-Growth	SSP1	IRQ	GDP|PPP	billion US$2005/yr	102.337	167.947	251.894	313.331	401.28	508.565	606.776	721.584	849.484	995.057	1163.69	1357.54	1572.15	1805.33	2061.59	2334.98	2618.12	2901.47	3172.54
OECD Env-Growth	SSP2	IRQ	GDP|PPP	billion US$2005/yr	102.337	170.224	257.024	319.952	404.018	496.482	576.392	662.928	753.014	851.295	965.222	1102.1	1266.35	1463.11	1698.19	1973.61	2288.49	2640.26	3025.85
OECD Env-Growth	SSP3	IRQ	GDP|PPP	billion US$2005/yr	102.337	172.239	265.253	344.501	456.435	593.784	714.299	827.593	918.488	986.802	1043.93	1104.35	1179.12	1276.9	1401.51	1553.11	1733.37	1943.2	2184.61
OECD Env-Growth	SSP4	IRQ	GDP|PPP	billion US$2005/yr	102.337	172.051	264.842	345.414	464.624	619.913	771.372	932.399	1092.02	1253.44	1430.94	1642.37	1904.13	2231.59	2635.08	3121.4	3698.68	4374.68	5160.04
OECD Env-Growth	SSP5	IRQ	GDP|PPP	billion US$2005/yr	102.337	167.795	252.686	331.296	461.256	651.104	859.659	1099.03	1354.26	1627.17	1927.36	2263.36	2633.01	3039.02	3495.59	3997.86	4538.22	5104.42	5677.34
IIASA GDP	SSP1	ISL	GDP|PPP	billion US$2005/yr	11.4242	13.6306	15.9635	19.1906	22.775	26.7028	30.9388	35.4324	40.1848	45.2156	50.5185	55.9837	61.4401	66.7866	71.9439	76.8613	81.5017	85.9417	90.2282
IIASA GDP	SSP2	ISL	GDP|PPP	billion US$2005/yr	11.4242	13.5466	15.6893	18.6719	21.7955	25.0934	28.5366	32.1396	35.8874	39.8317	44.0123	48.3883	52.8705	57.3817	61.8719	66.3114	70.6719	74.9139	78.9627
IIASA GDP	SSP3	ISL	GDP|PPP	billion US$2005/yr	11.4242	13.4494	15.3018	17.6737	19.8418	21.8411	23.6269	25.2162	26.6452	28.0316	29.3215	30.4727	31.3824	31.9604	32.2697	32.4438	32.5976	32.7608	32.8363
IIASA GDP	SSP4	ISL	GDP|PPP	billion US$2005/yr	11.4242	13.5514	15.6588	18.5047	21.2791	23.9618	26.4843	28.8623	31.1037	33.3043	35.41	37.3685	39.0606	40.3613	41.3127	42.0161	42.5713	43.0126	43.2551
IIASA GDP	SSP5	ISL	GDP|PPP	billion US$2005/yr	11.4242	13.7163	16.3226	20.1494	24.6906	29.9496	35.9037	42.5607	49.98	58.2457	67.4323	77.4681	88.1352	99.3049	110.905	122.924	135.368	148.375	162.052
OECD Env-Growth	SSP1	ISL	GDP|PPP	billion US$2005/yr	10.424	12.028	14.071	16.447	19.222	22.293	25.575	28.966	32.334	35.787	39.385	43.25	47.293	51.326	55.294	59.157	62.964	66.786	70.627
OECD Env-Growth	SSP2	ISL	GDP|PPP	billion US$2005/yr	10.424	12.016	13.986	16.109	18.509	21.182	24.204	27.484	30.89	34.466	38.24	42.335	46.698	51.147	55.637	60.156	64.777	69.55	74.447
OECD Env-Growth	SSP3	ISL	GDP|PPP	billion US$2005/yr	10.424	11.897	13.574	15.147	16.73	18.277	19.822	21.244	22.425	23.434	24.298	25.106	25.778	26.191	26.405	26.469	26.459	26.413	26.274
OECD Env-Growth	SSP4	ISL	GDP|PPP	billion US$2005/yr	10.424	11.969	13.886	16.09	18.618	21.298	24.024	26.7	29.232	31.729	34.241	36.831	39.385	41.705	43.842	45.807	47.672	49.45	51.041
OECD Env-Growth	SSP5	ISL	GDP|PPP	billion US$2005/yr	10.424	12.13	14.462	17.507	21.308	25.775	30.827	36.507	42.765	49.797	57.79	67.02	77.578	89.369	102.249	116.22	131.419	148.101	166.594
IIASA GDP	SSP1	ISR	GDP|PPP	billion US$2005/yr	184.904	207.707	221.179	236.249	260.929	294.88	336.091	381.672	428.665	474.934	523.712	579.83	646.621	724.875	814.437	915.232	1026.89	1149.6	1284.85
IIASA GDP	SSP2	ISR	GDP|PPP	billion US$2005/yr	184.904	208.045	220.707	233.371	254.034	283.032	319.196	360.64	405.243	451.391	499.595	552.507	613.141	683.104	762.652	851.634	950.068	1058.23	1176.34
IIASA GDP	SSP3	ISR	GDP|PPP	billion US$2005/yr	184.904	227.981	273.47	319.678	363.563	406.625	450.338	494.893	539.535	583.869	628.006	672.717	718.712	765.726	813.162	860.753	908.734	957.249	1006.18
IIASA GDP	SSP4	ISR	GDP|PPP	billion US$2005/yr	184.904	207.396	217.583	225.414	237.999	255.651	277.308	301.302	325.79	349.824	374.168	400.213	428.817	459.634	492.072	526.591	563.84	604.128	647.111
IIASA GDP	SSP5	ISR	GDP|PPP	billion US$2005/yr	184.904	209.136	227.378	251.645	290.681	344.181	410.174	485.587	568.389	660.377	768.673	902.177	1068.11	1271.97	1518.76	1814.61	2166.28	2582.99	3078.03
OECD Env-Growth	SSP1	ISR	GDP|PPP	billion US$2005/yr	198.145	245.926	302.377	367.361	443.462	531.696	630.651	736.55	845.769	959.15	1079.64	1210.7	1351.14	1499.2	1655.75	1822.89	2001.75	2193.47	2397.99
OECD Env-Growth	SSP2	ISR	GDP|PPP	billion US$2005/yr	198.145	245.999	301.963	363.366	430.691	505.187	589.198	681.24	779.741	885.427	1000.9	1129.62	1271.37	1424.96	1590.67	1770.82	1967.96	2183.88	2417.56
OECD Env-Growth	SSP3	ISR	GDP|PPP	billion US$2005/yr	198.145	243.007	291.967	341.761	391.39	441.348	491.576	539.452	583.467	625.14	667.473	710.394	751.699	789.587	824.674	858.637	893.045	928.194	961.848
OECD Env-Growth	SSP4	ISR	GDP|PPP	billion US$2005/yr	198.145	244.786	298.48	359.391	428.657	506.375	590.079	676.503	763.226	851.327	943.948	1042.72	1145.63	1250.78	1359.74	1474.19	1596.08	1726.16	1860.56
OECD Env-Growth	SSP5	ISR	GDP|PPP	billion US$2005/yr	198.145	248.654	311.701	389.989	488.633	609.504	753.514	920.04	1107.63	1318.72	1558.45	1839.82	2170.11	2555.25	3001.08	3517.85	4116.52	4813.63	5630.44
IIASA GDP	SSP1	ITA	GDP|PPP	billion US$2005/yr	1675.32	1849.14	2188.11	2680.71	3204.78	3713.11	4178.24	4592.31	4953.11	5275.38	5569.52	5829.68	6046.4	6224.81	6382.03	6533.19	6685.96	6839.04	6986.13
IIASA GDP	SSP2	ITA	GDP|PPP	billion US$2005/yr	1675.32	1851.48	2188.68	2668.24	3166.15	3637.63	4059.66	4426.41	4737.47	5007.14	5247.67	5462.11	5652.92	5828.22	5998.91	6174.03	6352.64	6524.93	6681.73
IIASA GDP	SSP3	ITA	GDP|PPP	billion US$2005/yr	1675.32	1695.39	1748.59	1844.28	1949.81	2054.76	2151.79	2232.55	2289.86	2328.18	2351.22	2362.81	2368.08	2370.6	2373.13	2377.12	2382.12	2384.98	2382.11
IIASA GDP	SSP4	ITA	GDP|PPP	billion US$2005/yr	1675.32	1852.4	2187.16	2655.18	3126.84	3559.65	3935.52	4250.82	4506.39	4720.38	4903.62	5058.29	5187.05	5293.59	5384.48	5468.61	5548.82	5616.6	5662.48
IIASA GDP	SSP5	ITA	GDP|PPP	billion US$2005/yr	1675.32	1857.39	2222.45	2774.52	3401.4	4058.48	4714.61	5359.04	5986.17	6609.17	7240.18	7873.6	8495.82	9111.16	9738.6	10395.7	11092	11830.3	12609.1
OECD Env-Growth	SSP1	ITA	GDP|PPP	billion US$2005/yr	1641.25	1690.43	1800.86	1930.94	2093.96	2285.84	2491.29	2705.84	2925.12	3151.85	3387.72	3620.55	3833.27	4026.63	4214.97	4390.28	4555.16	4707.78	4843.57
OECD Env-Growth	SSP2	ITA	GDP|PPP	billion US$2005/yr	1641.25	1687.62	1791.99	1903.89	2025.24	2154.62	2293.39	2444.8	2609.63	2789.12	2983.47	3183.48	3378.17	3569.49	3770.09	3976.87	4185.48	4389.96	4587.08
OECD Env-Growth	SSP3	ITA	GDP|PPP	billion US$2005/yr	1641.25	1674.97	1756.87	1827.7	1883.51	1922.73	1950.99	1971.27	1985.51	1995.02	2002.88	2005.97	1996.99	1979.73	1966.41	1952.54	1938.45	1922.18	1899.13
OECD Env-Growth	SSP4	ITA	GDP|PPP	billion US$2005/yr	1641.25	1684.39	1785.47	1901.28	2041.35	2200.49	2365.39	2535.25	2709.57	2887.27	3069.59	3245.8	3401.72	3539.55	3676.67	3807.96	3932.84	4046.45	4140.7
OECD Env-Growth	SSP5	ITA	GDP|PPP	billion US$2005/yr	1641.25	1700.03	1825.78	2001.5	2249.41	2563.9	2920.16	3321.17	3769.4	4275.59	4849.62	5479.99	6149.45	6860.52	7629.07	8443.23	9307.56	10221.5	11186.9
IIASA GDP	SSP1	JAM	GDP|PPP	billion US$2005/yr	24.8714	27.3494	33.8091	43.4288	53.9301	63.1761	69.9648	74.344	76.8386	78.3666	79.6936	81.3691	83.5759	86.2553	89.2764	92.4666	95.595	98.2765	100.153
IIASA GDP	SSP2	JAM	GDP|PPP	billion US$2005/yr	24.8714	27.435	33.7292	42.806	52.5911	61.4733	68.6327	74.21	78.5522	81.9922	84.8313	87.7241	91.1477	95.3182	100.116	105.367	110.978	116.939	123.268
IIASA GDP	SSP3	JAM	GDP|PPP	billion US$2005/yr	24.8714	27.5751	33.1548	41.9688	52.4606	63.34	72.9362	81.2202	88.6313	95.6564	102.524	109.528	116.938	125.085	134.231	144.47	155.808	168.374	182.395
IIASA GDP	SSP4	JAM	GDP|PPP	billion US$2005/yr	24.8714	27.2385	32.7694	40.076	46.9633	52.2337	55.5527	57.353	58.0976	58.2335	58.0097	57.7238	57.5253	57.4199	57.3011	57.0731	56.8252	56.6235	56.4934
IIASA GDP	SSP5	JAM	GDP|PPP	billion US$2005/yr	24.8714	27.2686	33.5579	42.7963	52.7744	61.495	67.8466	71.7129	73.9136	75.512	77.036	78.8581	81.1132	83.8373	87.0136	90.5761	94.3687	98.0815	101.423
OECD Env-Growth	SSP1	JAM	GDP|PPP	billion US$2005/yr	18.919	19.906	21.455	23.896	27.324	31.753	37.048	43.045	49.374	55.803	61.798	67.388	72.939	78.138	83.078	87.608	91.734	95.361	98.361
OECD Env-Growth	SSP2	JAM	GDP|PPP	billion US$2005/yr	18.919	20.024	21.746	23.878	26.181	28.683	31.761	35.441	39.55	44	48.566	53.493	59.174	65.417	72.161	79.316	86.936	95.168	103.98
OECD Env-Growth	SSP3	JAM	GDP|PPP	billion US$2005/yr	18.919	20.221	22.314	24.661	26.725	28.579	30.812	33.481	36.468	39.728	43.15	46.993	51.662	57.031	62.962	69.323	76.209	83.792	92.189
OECD Env-Growth	SSP4	JAM	GDP|PPP	billion US$2005/yr	18.919	19.923	21.437	23.315	25.538	27.963	30.889	34.317	38.082	42.105	46.085	50.08	54.394	58.812	63.292	67.676	71.981	76.257	80.419
OECD Env-Growth	SSP5	JAM	GDP|PPP	billion US$2005/yr	18.919	19.78	21.1	23.564	27.47	32.688	38.649	45.141	51.749	58.262	64.093	69.396	74.5	79.276	84.206	89.159	94.182	99.361	104.691
IIASA GDP	SSP1	JOR	GDP|PPP	billion US$2005/yr	29.1243	41.1392	59.922	85.4376	114.769	145.538	176.195	206.664	236.808	266.84	296.218	324.014	349.416	371.734	390.611	406.351	421.859	438.281	455.469
IIASA GDP	SSP2	JOR	GDP|PPP	billion US$2005/yr	29.1243	41.2385	59.5126	83.3791	110.139	138.309	167.18	197.047	227.939	260.04	292.847	325.44	356.565	385.315	411.38	434.722	455.484	473.923	490.208
IIASA GDP	SSP3	JOR	GDP|PPP	billion US$2005/yr	29.1243	41.1195	58.1309	77.2785	95.4051	112.237	128.649	145.529	163.157	181.823	201.225	221.015	240.853	260.86	281.305	302.354	323.888	345.72	367.674
IIASA GDP	SSP4	JOR	GDP|PPP	billion US$2005/yr	29.1243	40.8871	58.2194	78.8951	100.008	120.974	142.521	165.558	190.339	217.323	246.457	277.454	309.542	342.272	375.547	409.495	444.031	478.815	513.266
IIASA GDP	SSP5	JOR	GDP|PPP	billion US$2005/yr	29.1243	41.3088	61.1984	90.1308	126.317	167.428	211.254	257.086	304.31	352.899	402.228	450.91	501.951	559.286	625.236	699.014	778.203	858.9	937.532
OECD Env-Growth	SSP1	JOR	GDP|PPP	billion US$2005/yr	31.744	38.951	51.157	70.734	99.54	138.569	187.497	244.771	307.913	375.983	448.477	522.705	594.847	663.578	730.445	791.565	846.799	894.823	933.653
OECD Env-Growth	SSP2	JOR	GDP|PPP	billion US$2005/yr	31.744	39.235	51.771	70.856	96.548	128.994	168.812	215.956	269.745	330.371	398.382	472.405	550.72	632.855	719.017	806.53	894.252	981.189	1066.36
OECD Env-Growth	SSP3	JOR	GDP|PPP	billion US$2005/yr	31.744	39.173	51.403	68.251	88.723	111.838	138.342	168.031	200.535	236.343	276.303	320.254	367.893	419.718	475.576	533.43	593.211	654.897	718.717
OECD Env-Growth	SSP4	JOR	GDP|PPP	billion US$2005/yr	31.744	39.372	52.303	70.86	95.812	127.291	166.629	214.646	271.935	339.955	420.463	513.197	618.408	737.438	870.665	1015.08	1169.97	1334.87	1510.35
OECD Env-Growth	SSP5	JOR	GDP|PPP	billion US$2005/yr	31.744	39.165	51.97	74.145	109.095	159.792	226.423	308.517	403.832	511.962	633.217	764.333	899.933	1037.68	1178.88	1318.62	1456.25	1589.02	1712.35
IIASA GDP	SSP1	JPN	GDP|PPP	billion US$2005/yr	4064.12	4071.43	4130.5	4279.66	4481.31	4707.82	4939.71	5170.56	5401.35	5631.88	5862.07	6081.14	6273.93	6434.15	6564.01	6685.19	6808.66	6939.25	7071.26
IIASA GDP	SSP2	JPN	GDP|PPP	billion US$2005/yr	4064.12	4067.48	4109.85	4224.13	4371.08	4526.27	4674.3	4812.49	4946	5079.29	5216.87	5350.2	5469.02	5570.94	5660.28	5748.79	5841.23	5938.08	6034.04
IIASA GDP	SSP3	JPN	GDP|PPP	billion US$2005/yr	4064.12	3964.47	3839.77	3762.18	3727.39	3714.58	3706.56	3696.58	3684.63	3671.76	3655.43	3627.56	3584.2	3525.68	3458.86	3391.45	3326.14	3259.99	3187.96
IIASA GDP	SSP4	JPN	GDP|PPP	billion US$2005/yr	4064.12	4083.65	4150.33	4286.14	4428.94	4555.5	4659.87	4748.73	4830.48	4910.54	4991.35	5059.46	5101.4	5108.58	5081.99	5034.65	4976.77	4912.54	4838.18
IIASA GDP	SSP5	JPN	GDP|PPP	billion US$2005/yr	4064.12	4081.95	4179.99	4409.19	4742.01	5149.86	5609.69	6112.17	6655.34	7240.01	7873.16	8549.24	9248.42	9959.49	10681.7	11442.4	12261.7	13156.3	14127.6
OECD Env-Growth	SSP1	JPN	GDP|PPP	billion US$2005/yr	3899.3	4130.56	4351.95	4656.49	5022.83	5403.34	5754.02	6107.17	6436.96	6765.86	7085.56	7372.86	7623.65	7829.23	7994.34	8130.77	8245.62	8339.46	8410.11
OECD Env-Growth	SSP2	JPN	GDP|PPP	billion US$2005/yr	3899.3	4122.86	4320.84	4551.24	4764.43	4923.42	5049.35	5186.44	5319.23	5467.87	5630.8	5790.02	5944.11	6087.71	6224.97	6363.88	6507.13	6652.29	6795.25
OECD Env-Growth	SSP3	JPN	GDP|PPP	billion US$2005/yr	3899.3	4104.91	4262	4414.22	4509.94	4502.38	4427.72	4333.65	4212.84	4090.03	3967.24	3834.92	3693.54	3542.96	3397.22	3264.97	3146.85	3039.14	2933.23
OECD Env-Growth	SSP4	JPN	GDP|PPP	billion US$2005/yr	3899.3	4115.09	4308.48	4587.02	4929.74	5274.63	5576.05	5868.76	6129.46	6380.29	6619.22	6817.7	6967.05	7058.86	7111.7	7136.98	7142.53	7128.71	7082.89
OECD Env-Growth	SSP5	JPN	GDP|PPP	billion US$2005/yr	3899.3	4141.06	4395.48	4812.49	5381.94	6042.09	6703.69	7414.79	8158.48	8969.4	9845.77	10763.9	11728.1	12731	13761.9	14833.7	15952.9	17120.7	18353
IIASA GDP	SSP1	KAZ	GDP|PPP	billion US$2005/yr	180.676	287.39	375.015	445.524	492.462	525.101	552.01	578.159	605.06	635.494	670.07	707.757	747.06	786.457	824.81	861.575	896.368	928.296	956.828
IIASA GDP	SSP2	KAZ	GDP|PPP	billion US$2005/yr	180.676	288.077	376.668	447.845	496.048	530.924	561.641	593.218	624.866	658.77	696.598	738.55	783.215	829.121	874.937	920.453	966.011	1011.68	1057.33
IIASA GDP	SSP3	KAZ	GDP|PPP	billion US$2005/yr	180.676	288.265	377.257	448.249	495.432	529.292	560.103	593.485	628.939	666.725	707.124	751.693	801.155	855.531	913.846	975.53	1040.61	1109.43	1182.07
IIASA GDP	SSP4	KAZ	GDP|PPP	billion US$2005/yr	180.676	286.548	368.539	425.561	453.364	465.69	473.535	481.986	490.019	498.076	505.793	512.851	518.434	522.833	526.364	529.44	532.144	534.073	534.649
IIASA GDP	SSP5	KAZ	GDP|PPP	billion US$2005/yr	180.676	287.736	378.022	455.611	514.443	562.161	606.625	655.219	710.124	774.058	847.079	927.709	1013.86	1103.17	1193.73	1284.32	1373.85	1460.5	1542.82
OECD Env-Growth	SSP1	KAZ	GDP|PPP	billion US$2005/yr	178.18	239.059	317.168	429.298	539.508	648.627	743.998	814.502	853.897	877.05	902.373	932.208	954.52	962.281	966.715	968.439	970.256	970.91	965.32
OECD Env-Growth	SSP2	KAZ	GDP|PPP	billion US$2005/yr	178.18	240.314	318.629	423.409	515.182	599.785	672.135	724.117	751.29	768.327	792.358	826.558	862.452	893.764	926.513	961.715	999.597	1038.14	1073.37
OECD Env-Growth	SSP3	KAZ	GDP|PPP	billion US$2005/yr	178.18	240.722	320.206	424.864	521.342	618.168	701.459	752.824	759.944	743.597	730.629	730.381	737.536	747.273	762.42	781.83	806.181	833.936	862.306
OECD Env-Growth	SSP4	KAZ	GDP|PPP	billion US$2005/yr	178.18	238.831	315.076	421.578	528.214	642.617	745.533	816.44	841.056	838.993	836.814	841.776	846.023	843.716	842.975	843.114	845.424	848.03	846.274
OECD Env-Growth	SSP5	KAZ	GDP|PPP	billion US$2005/yr	178.18	239.036	318.904	445.423	592.497	764.428	928.247	1059.01	1138.91	1188.24	1237.47	1294.95	1348.1	1388.14	1428.04	1467.59	1510.07	1553.17	1588.8
IIASA GDP	SSP1	KEN	GDP|PPP	billion US$2005/yr	47.013	64.4	93.0437	139.068	203.341	286.71	389.638	509.947	643.519	785.723	932.499	1080.47	1227.42	1370.57	1507.53	1636.47	1756.37	1865.64	1962.58
IIASA GDP	SSP2	KEN	GDP|PPP	billion US$2005/yr	47.013	64.36	90.4661	129.442	179.038	239.588	311.143	393.569	485.67	586.549	695.997	814.351	941.263	1076.08	1217.41	1362.87	1510.44	1657.67	1802.7
IIASA GDP	SSP3	KEN	GDP|PPP	billion US$2005/yr	47.013	63.4009	83.9437	111.538	143.193	177.542	212.876	248.657	282.683	315.224	347.824	381.346	415.955	451.435	487.741	524.741	562.622	601.037	640.309
IIASA GDP	SSP4	KEN	GDP|PPP	billion US$2005/yr	47.013	63.1323	83.5977	111.748	145.519	184.517	228.367	277.621	330.557	387.843	451.714	523.736	604.413	693.536	791.121	897.075	1011.56	1133.67	1263.7
IIASA GDP	SSP5	KEN	GDP|PPP	billion US$2005/yr	47.013	64.435	93.9319	143.344	216.583	317.954	451.239	616.297	809.318	1024.64	1256.37	1499.15	1748.6	1999.19	2245.74	2498.8	2783.59	3116.83	3501.2
OECD Env-Growth	SSP1	KEN	GDP|PPP	billion US$2005/yr	60.007	76.752	102	140.513	199.306	285.098	403.228	558.681	755.228	996.337	1283.65	1613.24	1974.49	2356.09	2756.14	3167.45	3580.45	3985.36	4368.91
OECD Env-Growth	SSP2	KEN	GDP|PPP	billion US$2005/yr	60.007	77.364	102.303	135.979	180.06	235.291	306.367	396.726	509.871	650.484	823.176	1031.33	1276.3	1558.28	1879.85	2242.61	2646.28	3088.1	3563.46
OECD Env-Growth	SSP3	KEN	GDP|PPP	billion US$2005/yr	60.007	78.513	104.759	135.592	170.281	207.502	251.565	303.673	365.337	438.126	524.291	625.223	742.373	876.281	1027.1	1195.06	1381.53	1586.38	1810.86
OECD Env-Growth	SSP4	KEN	GDP|PPP	billion US$2005/yr	60.007	78.301	103.843	132.416	163.456	193.524	226.984	264.567	307.149	355.3	409.85	470.983	539.155	614.09	695.442	783.302	878.248	980.318	1090.69
OECD Env-Growth	SSP5	KEN	GDP|PPP	billion US$2005/yr	60.007	76.674	101.936	143.652	214.093	325.061	482.721	695.283	969.428	1311.96	1727.88	2216.67	2767.83	3370.06	4026.74	4732.27	5477.86	6253.1	7039.55
IIASA GDP	SSP1	KGZ	GDP|PPP	billion US$2005/yr	12.4959	21.6169	43.2287	81.4688	125.511	161.225	182.532	193.074	198.588	203.271	208.797	215.679	223.774	232.596	241.572	250.315	258.566	266.125	273.111
IIASA GDP	SSP2	KGZ	GDP|PPP	billion US$2005/yr	12.4959	21.7792	43.0981	79.5456	120.79	155.967	180.831	197.483	209.205	218.991	228.577	239.086	250.763	263.278	276.206	289.472	303.073	317.296	332.31
IIASA GDP	SSP3	KGZ	GDP|PPP	billion US$2005/yr	12.4959	21.868	43.4808	80.8891	124.23	162.853	192.288	214.633	232.768	249.216	265.637	283.354	302.874	324.273	347.348	372.036	398.425	426.7	456.924
IIASA GDP	SSP4	KGZ	GDP|PPP	billion US$2005/yr	12.4959	21.6339	41.9098	74.5855	108.088	132.977	147.246	154.162	156.754	157.474	157.605	157.984	158.751	159.766	160.751	161.575	162.231	162.723	163.024
IIASA GDP	SSP5	KGZ	GDP|PPP	billion US$2005/yr	12.4959	21.5855	43.1036	81.1531	125.312	161.886	184.582	197.581	206.395	214.995	224.605	235.855	248.829	263.207	278.428	294.062	309.832	325.597	341.638
OECD Env-Growth	SSP1	KGZ	GDP|PPP	billion US$2005/yr	10.941	14.103	17.742	23.392	31.571	42.607	55.679	70.033	84.702	99.316	114.004	128.802	142.816	154.843	165.757	175.693	184.924	193.278	200.332
OECD Env-Growth	SSP2	KGZ	GDP|PPP	billion US$2005/yr	10.941	14.204	17.911	23.083	29.732	38.041	47.81	58.807	70.619	83.25	97.027	112.137	128.076	143.997	160.237	177.087	194.752	213.042	231.451
OECD Env-Growth	SSP3	KGZ	GDP|PPP	billion US$2005/yr	10.941	14.315	18.232	23.303	29.287	36.093	43.838	52.394	61.473	71.223	82.103	94.404	107.823	121.794	136.45	151.765	167.983	184.978	202.534
OECD Env-Growth	SSP4	KGZ	GDP|PPP	billion US$2005/yr	10.941	14.104	17.488	21.721	26.583	31.641	36.901	42.137	47.038	51.664	56.24	60.749	64.83	68.049	70.8	73.179	75.333	77.191	78.583
OECD Env-Growth	SSP5	KGZ	GDP|PPP	billion US$2005/yr	10.941	14.037	17.594	23.598	32.864	45.735	60.886	77.541	94.677	112.009	129.712	147.954	165.718	181.872	197.741	213.293	229.185	245.551	261.785
IIASA GDP	SSP1	KHM	GDP|PPP	billion US$2005/yr	25.1138	38.2878	57.4138	85.2489	117.528	152.213	187.298	221.655	250.622	276.408	299.891	324.809	351.434	377.744	410.581	446.028	482.131	516.033	548.077
IIASA GDP	SSP2	KHM	GDP|PPP	billion US$2005/yr	25.1138	37.7255	55.306	79.9478	107.646	136.663	165.411	193.236	217.139	239.454	261.364	285.939	314.045	345.343	378.124	411.759	446.456	482.648	530.431
IIASA GDP	SSP3	KHM	GDP|PPP	billion US$2005/yr	25.1138	37.47	54.3933	77.8288	103.645	129.551	153.42	174.375	190.322	203.695	215.779	228.802	243.318	259.215	276.124	293.904	313.264	334.687	358.587
IIASA GDP	SSP4	KHM	GDP|PPP	billion US$2005/yr	25.1138	37.1273	52.6437	72.3737	91.7443	108.987	123.28	134.478	141.038	144.845	146.87	148.669	150.477	152.166	153.556	154.646	155.763	157.245	158.997
IIASA GDP	SSP5	KHM	GDP|PPP	billion US$2005/yr	25.1138	38.2325	57.3264	85.1967	118.005	154.241	192.52	231.796	266.78	299.216	329.581	361.611	395.249	430.156	479.113	540.589	610.104	680.494	749.87
OECD Env-Growth	SSP1	KHM	GDP|PPP	billion US$2005/yr	27.826	38.277	54.263	74.976	102.551	138.222	181.993	234.146	291.704	354.218	418.362	485.054	552.742	618.426	680.881	738.848	793.015	844.215	891.361
OECD Env-Growth	SSP2	KHM	GDP|PPP	billion US$2005/yr	27.826	38.597	54.689	72.733	92.85	114.719	140.369	170.624	204.173	242.069	283.528	330.493	383.354	441.305	503.856	571.694	645.992	727.606	816.266
OECD Env-Growth	SSP3	KHM	GDP|PPP	billion US$2005/yr	27.826	38.784	55.373	72.272	88.837	104.118	120.384	138.326	156.469	175.583	194.882	215.879	238.958	263.7	289.958	317.676	347.728	380.695	417.175
OECD Env-Growth	SSP4	KHM	GDP|PPP	billion US$2005/yr	27.826	38.251	53.193	67.42	80.22	89.69	98.186	106.172	112.485	117.912	121.87	125.262	128.081	130.039	131.302	132.013	132.568	133.246	133.963
OECD Env-Growth	SSP5	KHM	GDP|PPP	billion US$2005/yr	27.826	38.129	54.078	76.683	109.745	154.758	210.093	275.684	348.056	426.983	508.744	595.293	685.158	775.303	865.804	955.178	1044.88	1136.92	1230.36
IIASA GDP	SSP1	KOR	GDP|PPP	billion US$2005/yr	1214.99	1317.69	1354.15	1377.64	1426.25	1495.21	1566.54	1638.16	1707.15	1773.89	1837.58	1899.16	1958.46	2013.62	2063.68	2110.11	2151.08	2187.44	2216.04
IIASA GDP	SSP2	KOR	GDP|PPP	billion US$2005/yr	1214.99	1315.91	1345.3	1355.57	1385.33	1430.21	1474.1	1509.02	1533.24	1549.55	1561.92	1573.82	1588.13	1605.76	1625.72	1646.35	1665.98	1686.11	1704.98
IIASA GDP	SSP3	KOR	GDP|PPP	billion US$2005/yr	1214.99	1326.22	1365.09	1372.37	1379.03	1383.86	1378.07	1362.11	1335.98	1303.01	1264.6	1222.84	1179.93	1137.07	1094.81	1052.79	1010.93	970.073	931.287
IIASA GDP	SSP4	KOR	GDP|PPP	billion US$2005/yr	1214.99	1322.07	1360.45	1375.12	1395.36	1416.99	1432.76	1444.99	1453.12	1458.11	1457.77	1450.67	1437.72	1420.48	1400.67	1379.34	1356.19	1331.86	1303.27
IIASA GDP	SSP5	KOR	GDP|PPP	billion US$2005/yr	1214.99	1320.76	1370.51	1420.79	1511.49	1635.05	1782.61	1951.18	2134.29	2328.43	2534.57	2757.08	2996.58	3250.14	3515.2	3793.95	4085.94	4395.46	4720.55
OECD Env-Growth	SSP1	KOR	GDP|PPP	billion US$2005/yr	1320.88	1597.62	1932.06	2290.13	2641.29	2969.3	3254.48	3497.91	3695.94	3867.88	3991.27	4089.68	4182.33	4243.91	4291.45	4320.29	4329.19	4315.34	4289.07
OECD Env-Growth	SSP2	KOR	GDP|PPP	billion US$2005/yr	1320.88	1595.57	1918.04	2242.8	2542.59	2810.06	3043.77	3249.01	3421.85	3577.03	3689.25	3777.88	3866.89	3937.1	4004.26	4063.03	4110.65	4147.94	4177.6
OECD Env-Growth	SSP3	KOR	GDP|PPP	billion US$2005/yr	1320.88	1590.28	1891.67	2167.38	2393.85	2558.99	2670.38	2733.79	2748.36	2735.5	2682.85	2611.1	2536.96	2444.46	2349.45	2246.36	2138.72	2030.6	1923.88
OECD Env-Growth	SSP4	KOR	GDP|PPP	billion US$2005/yr	1320.88	1592.54	1914.17	2259.03	2595.82	2901.59	3157.09	3368.07	3531.28	3667.12	3752.66	3806.18	3850.14	3862.57	3865.19	3851.9	3825.04	3788.14	3737.8
OECD Env-Growth	SSP5	KOR	GDP|PPP	billion US$2005/yr	1320.88	1601.04	1953.83	2368.25	2806.59	3244.46	3655.74	4053.81	4439.52	4835.5	5212.97	5596.65	6012.54	6432.86	6873.86	7328.33	7790.78	8254.32	8741.56
IIASA GDP	SSP1	KWT	GDP|PPP	billion US$2005/yr	116.353	142.253	152.897	151.433	150.279	157.355	171.642	191.379	215.83	244.46	273.362	300.358	324.981	346.606	365.463	381.7	394.612	403.992	409.616
IIASA GDP	SSP2	KWT	GDP|PPP	billion US$2005/yr	116.353	142.564	153.098	152.757	151.261	158.927	174.598	196.34	223.462	255.814	289.463	322.434	354.086	384.214	413.023	440.668	466.836	491.094	512.767
IIASA GDP	SSP3	KWT	GDP|PPP	billion US$2005/yr	116.353	141.719	148.403	142.909	137.738	138.154	150.035	168.215	190.894	217.885	246.194	274.924	304.152	334.618	366.84	400.8	435.876	471.36	506.752
IIASA GDP	SSP4	KWT	GDP|PPP	billion US$2005/yr	116.353	141.822	148.982	143.833	137.228	135.269	143.185	155.707	170.145	186.411	201.731	215.141	226.535	235.716	243.05	248.92	253.319	255.87	256.25
IIASA GDP	SSP5	KWT	GDP|PPP	billion US$2005/yr	116.353	143.68	160.149	166.364	172.216	187.45	212.298	245.466	286.524	335.318	387.464	439.536	490.361	538.566	583.917	625.997	663.058	693.801	717.324
OECD Env-Growth	SSP1	KWT	GDP|PPP	billion US$2005/yr	124.857	160.963	195.595	237.31	289.809	348.293	408.226	459.686	503.089	539.322	571.39	597.424	615.234	625.98	635.148	641.785	646.203	647.003	642.209
OECD Env-Growth	SSP2	KWT	GDP|PPP	billion US$2005/yr	124.857	161.679	197.214	238.683	287.511	338.901	394.595	443.948	489.16	529.938	568.69	603.675	634.079	661.516	689.64	717.87	746.253	773.152	796.819
OECD Env-Growth	SSP3	KWT	GDP|PPP	billion US$2005/yr	124.857	160.106	193.711	233.349	282.998	340.855	403.744	454.798	493.762	518.225	530.97	534.282	531.957	529.319	530.516	535.171	542.979	552.515	563.132
OECD Env-Growth	SSP4	KWT	GDP|PPP	billion US$2005/yr	124.857	161.086	196.273	240.746	300.825	375.458	459.512	534.87	599.154	649.023	687.086	712.801	727.66	735.753	743.273	749.67	755.374	758.838	758.037
OECD Env-Growth	SSP5	KWT	GDP|PPP	billion US$2005/yr	124.857	163.093	201.991	255.044	330.582	428.923	543.09	653.07	753.415	840.763	918.415	984.9	1038.54	1082.01	1124.4	1165.23	1204.05	1238.08	1263.16
IIASA GDP	SSP1	LAO	GDP|PPP	billion US$2005/yr	16.4938	24.4612	32.3973	38.4543	44.6593	51.6219	59.53	68.1062	77.3845	87.0927	98.953	112.45	126.343	138.597	148.231	155.03	159.439	162.077	163.468
IIASA GDP	SSP2	LAO	GDP|PPP	billion US$2005/yr	16.4938	24.1852	31.0373	35.2793	39.2149	43.5695	48.4781	53.7601	59.4325	65.5159	71.9705	79.0229	86.8953	95.5785	104.672	115.957	128.917	142.536	155.373
IIASA GDP	SSP3	LAO	GDP|PPP	billion US$2005/yr	16.4938	24.1065	30.5251	33.8472	36.2476	38.4274	40.4656	42.2557	43.8698	45.3847	46.8219	48.3098	49.916	51.6396	53.4015	55.1541	56.9762	58.9142	61.0125
IIASA GDP	SSP4	LAO	GDP|PPP	billion US$2005/yr	16.4938	24.0082	30.302	33.549	36.0753	38.6658	41.537	44.5988	47.9088	51.5164	55.4362	59.8033	64.6893	70.096	75.9212	82.1148	88.8086	96.082	104
IIASA GDP	SSP5	LAO	GDP|PPP	billion US$2005/yr	16.4938	24.4506	32.5651	39.2128	46.6427	55.6268	66.4951	78.9821	93.0952	108.434	127.218	148.825	171.499	192.219	209.836	226.265	243.459	262.371	282.783
OECD Env-Growth	SSP1	LAO	GDP|PPP	billion US$2005/yr	14.34	20.914	30.172	42.545	59.072	80.352	105.991	135.284	166.953	199.335	231.079	262.183	292.238	320.439	346.288	368.97	388.834	406.611	422.257
OECD Env-Growth	SSP2	LAO	GDP|PPP	billion US$2005/yr	14.34	21.077	30.413	41.328	53.504	66.822	82.23	99.753	119.22	140.211	162.566	187.055	214.16	243.811	275.415	308.634	343.621	380.765	420.51
OECD Env-Growth	SSP3	LAO	GDP|PPP	billion US$2005/yr	14.34	21.217	30.835	41.3	51.577	61.199	71.334	82.003	92.973	103.784	114.565	126.029	138.578	152.244	166.64	181.549	197.352	214.497	233.531
OECD Env-Growth	SSP4	LAO	GDP|PPP	billion US$2005/yr	14.34	21.173	30.551	40.057	48.789	55.863	62.745	69.505	75.996	81.921	87.485	93.296	99.665	106.604	113.842	121.295	129.279	138.141	148.27
OECD Env-Growth	SSP5	LAO	GDP|PPP	billion US$2005/yr	14.34	20.865	30.183	43.8	63.836	91.237	124.602	163.028	205.053	248.795	292.72	337.199	381.823	425.787	468.933	510.019	549.493	588.461	626.917
IIASA GDP	SSP1	LBN	GDP|PPP	billion US$2005/yr	52.905	69.6836	82.4093	90.7141	99.0783	108.523	118.9	129.512	139.361	147.666	155.222	162.715	170.518	178.343	185.863	192.742	198.712	203.528	206.679
IIASA GDP	SSP2	LBN	GDP|PPP	billion US$2005/yr	52.905	69.684	81.9836	89.0356	96.3399	105.203	115.576	126.582	137.203	146.711	154.697	161.966	169.317	177.142	185.36	193.8	202.388	211.097	219.954
IIASA GDP	SSP3	LBN	GDP|PPP	billion US$2005/yr	52.905	69.6888	81.5328	87.5424	92.7552	98.8878	106.764	115.886	125.318	134.173	142.141	149.344	156.161	163.17	170.83	179.526	189.599	201.24	214.498
IIASA GDP	SSP4	LBN	GDP|PPP	billion US$2005/yr	52.905	69.156	79.5628	83.1435	85.0875	88.1708	92.5784	97.5446	101.874	104.984	106.758	107.421	107.263	106.45	105.095	103.282	101.119	98.8796	96.8809
IIASA GDP	SSP5	LBN	GDP|PPP	billion US$2005/yr	52.905	69.7539	83.0004	92.5444	102.995	115.346	129.357	144.1	158.751	174.021	190.604	208.593	227.589	246.991	266.278	284.939	302.508	318.494	331.934
OECD Env-Growth	SSP1	LBN	GDP|PPP	billion US$2005/yr	53.347	61.97	75.379	91.86	110.966	132.487	155.029	176.633	196.021	213.735	229.354	242.646	253.865	262.372	268.728	272.785	274.899	275.401	273.875
OECD Env-Growth	SSP2	LBN	GDP|PPP	billion US$2005/yr	53.347	62.159	75.755	91.55	108.216	125.74	144.063	162.473	180.446	198.305	215.481	231.721	247.49	262.373	276.355	289.061	300.527	311.158	321.449
OECD Env-Growth	SSP3	LBN	GDP|PPP	billion US$2005/yr	53.347	62.393	76.155	90.532	103.811	115.534	126.678	136.816	145.902	154.929	163.817	172.791	182.448	192.591	202.877	212.868	222.794	233.03	244.044
OECD Env-Growth	SSP4	LBN	GDP|PPP	billion US$2005/yr	53.347	61.974	74.974	89.271	104.214	119.134	134.029	148.077	160.915	173.364	184.961	195.046	203.822	210.841	216.438	220.444	223.217	225.157	226.311
OECD Env-Growth	SSP5	LBN	GDP|PPP	billion US$2005/yr	53.347	61.943	75.304	92.985	115.111	141.528	170.249	199.547	228.001	256.33	284.187	310.906	336.206	359.193	380.431	399.653	417.189	433.292	446.966
IIASA GDP	SSP1	LBR	GDP|PPP	billion US$2005/yr	1.42291	2.43098	4.19405	6.86399	10.4383	15.1309	21.2842	29.3706	39.9112	53.5126	70.6949	91.6114	115.968	142.971	171.607	200.67	229.002	255.529	279.405
IIASA GDP	SSP2	LBR	GDP|PPP	billion US$2005/yr	1.42291	2.31528	3.7977	5.92688	8.66308	12.3827	17.2778	23.5505	31.1257	40.0548	50.5706	62.8711	77.0271	93.0922	111.265	131.569	154.767	181.2	210.876
IIASA GDP	SSP3	LBR	GDP|PPP	billion US$2005/yr	1.42291	2.22102	3.41284	4.907	6.59459	8.37061	10.2094	12.1183	14.1124	16.2038	18.3973	20.7072	23.1375	25.6977	28.3876	31.1717	34.0076	36.8747	39.7759
IIASA GDP	SSP4	LBR	GDP|PPP	billion US$2005/yr	1.42291	2.22755	3.47841	5.16909	7.27577	9.73043	12.5135	15.6451	19.1698	23.1492	27.6384	32.6952	38.3515	44.6552	51.6506	59.3147	67.5839	76.4069	85.7614
IIASA GDP	SSP5	LBR	GDP|PPP	billion US$2005/yr	1.42291	2.44863	4.32838	7.40087	11.9059	18.3367	27.4017	40.1045	57.6511	81.4655	112.98	152.995	201.337	256.547	316.389	378.137	439.144	503.073	573.839
OECD Env-Growth	SSP1	LBR	GDP|PPP	billion US$2005/yr	1.926	2.932	4.65	7.933	13.378	22.285	35.88	55.689	83.026	118.893	163.989	217.839	278.944	345.279	415.869	488.377	560.994	632.109	699.269
OECD Env-Growth	SSP2	LBR	GDP|PPP	billion US$2005/yr	1.926	2.972	4.637	7.398	11.24	16.515	23.849	34.017	47.82	66.172	90.184	120.733	158.551	204.138	257.915	319.973	390.382	468.755	554.197
OECD Env-Growth	SSP3	LBR	GDP|PPP	billion US$2005/yr	1.926	2.955	4.462	6.597	9.101	11.935	15.306	19.387	24.275	30.055	36.84	44.655	53.5	63.352	74.143	85.714	98.02	110.975	124.554
OECD Env-Growth	SSP4	LBR	GDP|PPP	billion US$2005/yr	1.926	2.986	4.576	6.871	9.528	12.366	15.584	19.316	23.602	28.471	33.977	40.075	46.721	53.868	61.448	69.3	77.39	85.669	94.164
OECD Env-Growth	SSP5	LBR	GDP|PPP	billion US$2005/yr	1.926	2.962	4.793	8.606	15.666	28.343	48.823	79.992	124.548	184.792	262.714	358.52	470.797	596.874	735.161	882.605	1036.36	1193.9	1350.67
IIASA GDP	SSP1	LBY	GDP|PPP	billion US$2005/yr	121.632	128.28	125.093	121.927	126.717	139.296	158.735	183.442	211.374	240.97	269.738	295.769	320.086	343.998	368.216	392.269	415.469	437.613	457.353
IIASA GDP	SSP2	LBY	GDP|PPP	billion US$2005/yr	121.632	128.512	125.267	121.239	124.713	135.558	153.022	175.852	202.545	231.804	262.022	291.762	319.699	346.697	374.639	404.716	437.134	471.636	507.321
IIASA GDP	SSP3	LBY	GDP|PPP	billion US$2005/yr	121.632	128.681	124.85	119.043	119.582	126.275	138.174	153.736	171.394	189.81	208.024	225.803	243.467	261.656	280.873	301.361	323.148	346.35	371.179
IIASA GDP	SSP4	LBY	GDP|PPP	billion US$2005/yr	121.632	127.85	121.763	112.8	109.433	111.589	118.108	127.219	137.154	146.809	155.482	162.94	169.245	174.443	178.638	182.038	184.887	187.31	189.18
IIASA GDP	SSP5	LBY	GDP|PPP	billion US$2005/yr	121.632	128.399	125.964	124.359	131.722	148.125	172.905	204.573	240.939	280.143	320.994	364.267	410.585	459.752	510.879	562.83	614.46	665.442	713.664
OECD Env-Growth	SSP1	LBY	GDP|PPP	billion US$2005/yr	99.765	127.813	159.087	194.456	234.748	278.611	321.099	359.376	393.463	427.089	462.495	499.295	533.872	564.516	591.974	616.793	640.481	662.66	679.993
OECD Env-Growth	SSP2	LBY	GDP|PPP	billion US$2005/yr	99.765	128.652	160.863	196.201	233.39	271.41	309.459	344.585	377.669	412.9	452.187	495.73	541.341	587.502	633.568	680.746	730.265	781.42	832.58
OECD Env-Growth	SSP3	LBY	GDP|PPP	billion US$2005/yr	99.765	129.036	162.221	198.12	235.554	273.453	307.085	331.173	346.023	357.651	369.745	384.204	400.378	418.362	437.857	458.958	482.55	508.506	536.134
OECD Env-Growth	SSP4	LBY	GDP|PPP	billion US$2005/yr	99.765	127.767	158.428	193.177	232.066	273.312	310.811	338.724	356.949	371.304	384.962	398.94	411.699	422.953	433.694	444.531	456.601	469.719	482.07
OECD Env-Growth	SSP5	LBY	GDP|PPP	billion US$2005/yr	99.765	127.737	159.04	197.588	247.6	308.906	372.571	431.216	483.439	534.572	589.221	648.524	708.647	767.771	826.892	886.498	948.661	1012.91	1073.91
IIASA GDP	SSP1	LCA	GDP|PPP	billion US$2005/yr	2.09268	2.59101	2.92506	3.28436	3.66178	4.04364	4.55049	5.15351	5.76216	6.26391	6.67902	7.05327	7.41956	7.77576	8.10855	8.40152	8.62358	8.7564	8.80211
IIASA GDP	SSP2	LCA	GDP|PPP	billion US$2005/yr	2.09268	2.59109	2.89351	3.2031	3.53544	3.89888	4.32575	4.7936	5.33332	5.89578	6.43598	6.91347	7.35567	7.78778	8.221	8.65199	9.07659	9.49197	9.89798
IIASA GDP	SSP3	LCA	GDP|PPP	billion US$2005/yr	2.09268	2.58292	2.84941	3.10073	3.36663	3.66617	4.02518	4.41952	4.79862	5.13261	5.43455	5.73443	6.0507	6.37186	6.69388	7.02183	7.37503	7.76695	8.20768
IIASA GDP	SSP4	LCA	GDP|PPP	billion US$2005/yr	2.09268	2.56239	2.77956	2.94673	3.09442	3.24793	3.43834	3.64397	3.81886	3.9334	3.99645	4.02619	4.03316	4.00833	3.95665	3.88327	3.79877	3.71212	3.62436
IIASA GDP	SSP5	LCA	GDP|PPP	billion US$2005/yr	2.09268	2.5924	2.94073	3.33692	3.78115	4.25914	4.89978	5.67317	6.4772	7.2545	8.03434	8.84299	9.67729	10.5172	11.3385	12.1148	12.797	13.351	13.7709
OECD Env-Growth	SSP1	LCA	GDP|PPP	billion US$2005/yr	1.439	1.524	1.719	2.017	2.448	3.008	3.67	4.416	5.21	6.037	6.88	7.724	8.537	9.266	9.936	10.537	11.054	11.48	11.797
OECD Env-Growth	SSP2	LCA	GDP|PPP	billion US$2005/yr	1.439	1.531	1.733	1.999	2.321	2.683	3.1	3.572	4.091	4.66	5.283	5.961	6.688	7.435	8.208	9.002	9.817	10.653	11.507
OECD Env-Growth	SSP3	LCA	GDP|PPP	billion US$2005/yr	1.439	1.539	1.751	1.993	2.246	2.489	2.745	3.013	3.288	3.572	3.874	4.204	4.566	4.946	5.345	5.766	6.221	6.715	7.256
OECD Env-Growth	SSP4	LCA	GDP|PPP	billion US$2005/yr	1.439	1.527	1.722	1.968	2.278	2.629	3.023	3.453	3.905	4.378	4.871	5.377	5.881	6.352	6.797	7.208	7.595	7.964	8.307
OECD Env-Growth	SSP5	LCA	GDP|PPP	billion US$2005/yr	1.439	1.522	1.718	2.056	2.602	3.365	4.288	5.356	6.529	7.793	9.136	10.535	11.946	13.301	14.625	15.906	17.117	18.242	19.242
IIASA GDP	SSP1	LKA	GDP|PPP	billion US$2005/yr	84.2289	97.1842	103.322	107.794	116.919	132.82	156.306	187.156	223.539	263.97	305.322	344.334	378.413	406.672	429.511	447.533	460.675	468.585	472.112
IIASA GDP	SSP2	LKA	GDP|PPP	billion US$2005/yr	84.2289	97.3894	102.852	104.639	109.704	119.182	133.443	151.934	174.666	201.367	231.393	263.762	297.467	331.88	366.581	401.238	435.454	468.516	499.538
IIASA GDP	SSP3	LKA	GDP|PPP	billion US$2005/yr	84.2289	97.4407	101.789	100.492	100.692	103.507	108.936	116.159	124.223	132.331	140.313	148.42	156.561	164.816	173.751	183.726	194.835	206.871	219.825
IIASA GDP	SSP4	LKA	GDP|PPP	billion US$2005/yr	84.2289	96.8184	99.7053	96.7272	95.2579	96.5309	100.5	106.202	112.619	118.795	124.344	129.274	133.321	136.431	139.431	142.748	146.382	149.954	152.964
IIASA GDP	SSP5	LKA	GDP|PPP	billion US$2005/yr	84.2289	97.1675	103.894	109.936	122.023	142.865	173.879	215.335	265.406	322.286	381.938	439.913	492.435	537.781	578.7	622.292	672.326	728.643	787.96
OECD Env-Growth	SSP1	LKA	GDP|PPP	billion US$2005/yr	95.022	132.205	179.881	237.732	310.885	398.264	493.71	591.246	688.87	784.47	878.3	966.635	1040.62	1098.83	1149.26	1194.01	1232.19	1260.88	1276.54
OECD Env-Growth	SSP2	LKA	GDP|PPP	billion US$2005/yr	95.022	133.047	180.569	235.366	294.842	357.098	423.233	491.701	563.922	641.692	725.822	814.335	901.864	987.389	1074.46	1163.46	1253.57	1343.04	1429.95
OECD Env-Growth	SSP3	LKA	GDP|PPP	billion US$2005/yr	95.022	133.283	180.838	231.051	276.811	315.509	350.811	382.043	411.114	440.353	471.109	502.918	533.73	564.246	596.344	630.166	665.947	703.356	742.67
OECD Env-Growth	SSP4	LKA	GDP|PPP	billion US$2005/yr	95.022	132.104	177.587	229.043	283.211	336.799	388.906	436.662	481.149	524.361	566.941	606.565	638.648	663.243	685.306	705.629	724.6	741.525	754.79
OECD Env-Growth	SSP5	LKA	GDP|PPP	billion US$2005/yr	95.022	131.928	179.469	241.716	327.536	436.051	556.617	682.26	810.838	940.523	1072.27	1202.55	1320.08	1422.62	1520.31	1616.61	1710.89	1799.21	1875.06
IIASA GDP	SSP1	LSO	GDP|PPP	billion US$2005/yr	2.49969	3.095	3.44288	4.0253	4.96916	6.32193	8.08206	10.2233	12.7328	15.6193	18.8882	22.9093	27.5659	32.468	37.0643	41.0854	44.4897	47.3571	49.7841
IIASA GDP	SSP2	LSO	GDP|PPP	billion US$2005/yr	2.49969	3.04329	3.2443	3.55157	4.08042	4.83767	5.80031	6.94207	8.26003	9.78852	11.5833	13.6871	16.128	18.8758	21.8744	25.4996	29.6511	34.1006	38.5011
IIASA GDP	SSP3	LSO	GDP|PPP	billion US$2005/yr	2.49969	2.96412	2.99554	3.02714	3.16238	3.38253	3.64951	3.91981	4.18458	4.45156	4.74179	5.05647	5.40258	5.77755	6.18558	6.62049	7.08403	7.57728	8.10725
IIASA GDP	SSP4	LSO	GDP|PPP	billion US$2005/yr	2.49969	2.95229	2.98173	3.02635	3.20321	3.50262	3.90212	4.36402	4.88099	5.46348	6.14142	6.91966	7.81031	8.81406	9.94424	11.2001	12.5926	14.1306	15.8346
IIASA GDP	SSP5	LSO	GDP|PPP	billion US$2005/yr	2.49969	3.09486	3.46932	4.13412	5.2636	6.96586	9.30673	12.3151	16.0177	20.453	25.6477	32.1381	39.7971	48.0586	56.0572	63.316	69.7617	76.5023	84.4294
OECD Env-Growth	SSP1	LSO	GDP|PPP	billion US$2005/yr	3.119	3.947	4.886	6.383	8.737	12.224	17.131	23.69	32.014	42.102	53.842	66.997	81.202	95.967	110.992	125.68	139.784	153.125	165.319
OECD Env-Growth	SSP2	LSO	GDP|PPP	billion US$2005/yr	3.119	3.981	4.914	6.173	7.826	9.888	12.612	16.119	20.499	25.866	32.336	40.044	49.098	59.498	71.239	84.283	98.582	114.078	130.566
OECD Env-Growth	SSP3	LSO	GDP|PPP	billion US$2005/yr	3.119	3.984	4.888	5.927	7.077	8.26	9.677	11.32	13.209	15.332	17.696	20.329	23.277	26.554	30.156	34.054	38.289	42.914	47.951
OECD Env-Growth	SSP4	LSO	GDP|PPP	billion US$2005/yr	3.119	3.979	4.851	5.779	6.771	7.675	8.717	9.879	11.169	12.57	14.081	15.718	17.512	19.465	21.568	23.801	26.199	28.805	31.644
OECD Env-Growth	SSP5	LSO	GDP|PPP	billion US$2005/yr	3.119	3.941	4.883	6.549	9.452	14.063	20.715	29.808	41.595	56.186	73.549	93.507	115.685	139.525	164.765	190.591	216.681	242.804	268.351
IIASA GDP	SSP1	LTU	GDP|PPP	billion US$2005/yr	50.4423	57.4246	65.9709	73.9119	78.8435	81.1559	81.8164	81.793	81.6433	81.968	83.0823	84.9173	87.1732	89.544	91.8251	93.8739	95.5244	96.816	98.0968
IIASA GDP	SSP2	LTU	GDP|PPP	billion US$2005/yr	50.4423	57.627	66.2275	73.8324	78.1917	80.0543	80.5871	80.7325	80.8235	81.0061	81.7076	83.122	85.1527	87.5989	90.3491	93.4721	97.1328	101.469	106.497
IIASA GDP	SSP3	LTU	GDP|PPP	billion US$2005/yr	50.4423	58.0109	66.9855	74.7419	79.037	80.9635	81.8874	82.8557	84.1929	85.9406	88.126	90.8437	94.2381	98.4973	103.753	110.084	117.521	126.045	135.544
IIASA GDP	SSP4	LTU	GDP|PPP	billion US$2005/yr	50.4423	57.3744	64.9899	70.6781	72.5307	71.9162	70.235	68.3716	66.5544	64.8533	63.3273	61.9697	60.6609	59.2673	57.9829	57.002	56.4531	56.3246	56.5428
IIASA GDP	SSP5	LTU	GDP|PPP	billion US$2005/yr	50.4423	57.4308	66.2107	74.7619	80.7036	84.2326	86.1048	87.7293	89.9532	93.1939	97.5071	102.683	108.38	114.246	120.022	125.513	130.486	135.024	139.676
OECD Env-Growth	SSP1	LTU	GDP|PPP	billion US$2005/yr	51.059	61.366	71.844	80.522	89.031	98.089	106.401	112.709	115.974	117.121	118.069	119.811	121.588	122.093	121.42	120.055	118.403	116.998	115.797
OECD Env-Growth	SSP2	LTU	GDP|PPP	billion US$2005/yr	51.059	61.419	71.653	79.16	85.45	92.044	98.578	104.287	108.251	110.927	113.779	117.742	122.339	126.387	129.621	132.525	135.523	139.211	143.753
OECD Env-Growth	SSP3	LTU	GDP|PPP	billion US$2005/yr	51.059	61.635	71.919	78.319	82.375	85.851	89.305	92.146	93.78	94.852	96.71	100.125	104.704	109.526	114.099	118.452	122.947	128.125	134.255
OECD Env-Growth	SSP4	LTU	GDP|PPP	billion US$2005/yr	51.059	61.261	71.058	77.682	83.157	88.413	93.285	97.095	99.135	100.144	101.475	103.573	105.8	107.061	107.363	107.238	107.161	107.586	108.401
OECD Env-Growth	SSP5	LTU	GDP|PPP	billion US$2005/yr	51.059	61.249	71.71	81.598	92.043	103.277	113.64	122.227	127.939	131.796	135.863	141.21	146.871	151.326	154.638	157.341	159.894	163.085	166.975
IIASA GDP	SSP1	LUX	GDP|PPP	billion US$2005/yr	41.5266	55.063	68.6993	82.6708	97.5132	113.614	131.033	149.55	168.768	188.279	207.733	226.674	244.674	261.33	276.567	290.165	301.755	311.494	319.623
IIASA GDP	SSP2	LUX	GDP|PPP	billion US$2005/yr	41.5266	55.1645	68.7429	82.2192	96.0703	110.747	126.371	142.766	159.597	176.538	193.368	209.706	225.213	239.668	253.021	265.186	276.081	285.736	293.979
IIASA GDP	SSP3	LUX	GDP|PPP	billion US$2005/yr	41.5266	53.7337	63.6715	71.1834	77.5986	83.8185	90.1538	96.3751	102.167	107.356	111.857	115.627	118.733	121.16	122.936	124.113	124.749	124.806	124.224
IIASA GDP	SSP4	LUX	GDP|PPP	billion US$2005/yr	41.5266	55.1963	68.6496	81.5989	94.227	106.955	119.996	133.232	146.357	159.139	171.318	182.538	192.606	201.308	208.552	214.273	218.499	221.283	222.457
IIASA GDP	SSP5	LUX	GDP|PPP	billion US$2005/yr	41.5266	55.5421	70.8102	88.2778	108.674	132.333	159.194	189.113	221.686	256.521	293.368	331.742	370.931	410.305	449.612	488.482	526.353	563.389	600.042
OECD Env-Growth	SSP1	LUX	GDP|PPP	billion US$2005/yr	34.848	38.656	44.203	49.655	54.876	60.019	65.175	70.055	74.688	79.316	83.905	88.189	91.965	95.152	97.784	100.151	102.792	105.236	107.34
OECD Env-Growth	SSP2	LUX	GDP|PPP	billion US$2005/yr	34.848	38.609	44.008	49.24	54.186	59.015	63.849	68.499	73.065	77.734	82.438	86.877	91.136	95.683	100.229	104.627	108.849	112.845	116.53
OECD Env-Growth	SSP3	LUX	GDP|PPP	billion US$2005/yr	34.848	38.026	42.172	45.448	48.045	50.249	52.012	53.219	54.036	54.681	55.113	55.187	54.831	54.086	53.066	51.809	50.414	48.875	47.126
OECD Env-Growth	SSP4	LUX	GDP|PPP	billion US$2005/yr	34.848	38.519	43.677	48.539	53.03	57.344	61.467	65.205	68.628	71.928	75.09	77.83	80.02	82.328	84.503	86.345	87.936	89.232	90.03
OECD Env-Growth	SSP5	LUX	GDP|PPP	billion US$2005/yr	34.848	39.196	45.876	53.12	60.724	69.042	78.193	87.965	98.51	110.223	123.317	137.616	153.024	169.46	186.872	205.099	224.074	243.865	264.601
IIASA GDP	SSP1	LVA	GDP|PPP	billion US$2005/yr	28.5171	34.2547	39.7161	46.0654	50.6648	53.4974	55.1319	56.1513	56.8802	57.9098	59.391	61.1819	63.076	64.922	66.5702	67.9175	68.7996	69.1888	69.4339
IIASA GDP	SSP2	LVA	GDP|PPP	billion US$2005/yr	28.5171	34.4045	39.8452	45.823	49.8747	52.3012	53.8465	55.0252	55.9289	56.924	58.2248	59.8223	61.6062	63.487	65.4085	67.3976	69.5321	71.8631	74.4134
IIASA GDP	SSP3	LVA	GDP|PPP	billion US$2005/yr	28.5171	34.5324	39.9523	45.5811	49.011	50.8399	51.9688	52.9048	53.7328	54.7126	55.8881	57.3518	59.1642	61.4242	64.1595	67.4218	71.2386	75.5755	80.3444
IIASA GDP	SSP4	LVA	GDP|PPP	billion US$2005/yr	28.5171	34.2662	39.1477	43.954	46.3719	47.0864	46.9949	46.5971	45.9419	45.2729	44.6259	43.9703	43.2459	42.4534	41.6682	40.9788	40.4434	40.0426	39.7416
IIASA GDP	SSP5	LVA	GDP|PPP	billion US$2005/yr	28.5171	34.2826	39.9888	47.0121	52.7774	57.0899	60.3078	63.2987	66.5887	70.7114	75.6878	81.2421	87.0774	92.9517	98.6352	103.943	108.562	112.356	115.75
OECD Env-Growth	SSP1	LVA	GDP|PPP	billion US$2005/yr	28.991	35.415	41.654	48.376	56.255	64.219	71.465	77.709	82.403	85.896	89.569	93.129	95.613	96.851	97.782	97.971	97.605	96.963	95.892
OECD Env-Growth	SSP2	LVA	GDP|PPP	billion US$2005/yr	28.991	35.426	41.46	46.958	52.455	57.294	61.696	65.717	69.072	72.029	75.643	79.638	83.296	86.466	89.714	92.779	95.799	98.923	102.075
OECD Env-Growth	SSP3	LVA	GDP|PPP	billion US$2005/yr	28.991	35.473	41.461	46.091	49.918	52.487	54.412	55.877	56.737	57.316	58.56	60.32	62.092	63.831	65.856	67.892	70.098	72.588	75.327
OECD Env-Growth	SSP4	LVA	GDP|PPP	billion US$2005/yr	28.991	35.349	41.231	46.599	52.145	57.067	61.357	64.993	67.712	69.832	72.437	75.136	77.152	78.338	79.411	80.073	80.608	81.173	81.538
OECD Env-Growth	SSP5	LVA	GDP|PPP	billion US$2005/yr	28.991	35.39	41.869	49.999	60.527	71.977	82.858	92.926	101.585	109.232	117.457	125.859	133.228	139.217	144.926	149.798	154.01	157.845	160.959
OECD Env-Growth	SSP1	MAC	GDP|PPP	billion US$2005/yr	31.329	36.197	40.065	43.443	46.986	50.456	53.497	55.995	57.789	58.955	59.801	60.124	59.662	58.336	56.492	54.164	51.576	49.032	46.44
OECD Env-Growth	SSP2	MAC	GDP|PPP	billion US$2005/yr	31.329	36.316	40.138	43.417	46.799	50.14	53.211	55.972	58.35	60.411	62.435	64.156	65.373	65.975	66.185	66.074	65.723	65.171	64.385
OECD Env-Growth	SSP3	MAC	GDP|PPP	billion US$2005/yr	31.329	35.425	38.522	40.502	42.112	43.426	44.424	45.173	45.656	45.945	46.478	47.257	48.114	48.855	49.413	49.823	50.163	50.44	50.661
OECD Env-Growth	SSP4	MAC	GDP|PPP	billion US$2005/yr	31.329	35.943	39.239	41.857	44.597	47.157	49.282	50.968	52.221	53.15	54.038	54.589	54.614	54.274	53.802	53.157	52.395	51.492	50.335
OECD Env-Growth	SSP5	MAC	GDP|PPP	billion US$2005/yr	31.329	37.117	41.59	46.208	51.539	57.275	62.867	68.115	72.86	77.227	81.422	84.995	87.639	89.264	90.315	90.825	90.818	90.258	88.979
IIASA GDP	SSP1	MAR	GDP|PPP	billion US$2005/yr	102.966	124.899	145.193	168.691	197.616	232.756	272.777	321.531	379.791	445.867	513.624	577.299	632.521	676.871	710.202	733.888	749.678	759.104	767.66
IIASA GDP	SSP2	MAR	GDP|PPP	billion US$2005/yr	102.966	123.706	140.404	158.152	179.584	205.514	234.767	267.153	302.733	342.299	385.168	437.817	497.735	559.85	617.417	668.896	714.904	757.08	796.778
IIASA GDP	SSP3	MAR	GDP|PPP	billion US$2005/yr	102.966	121.872	133.401	142.82	152.965	163.995	174.196	183.424	192.15	201.619	212.376	224.737	238.4	252.708	267.286	282.573	299.582	319.047	341.237
IIASA GDP	SSP4	MAR	GDP|PPP	billion US$2005/yr	102.966	120.58	129.638	135.342	141.143	147.831	154.438	160.769	166.931	173.429	180.144	187.027	193.782	199.961	205.575	210.958	216.681	223.131	230.04
IIASA GDP	SSP5	MAR	GDP|PPP	billion US$2005/yr	102.966	124.703	145.183	169.743	201.423	241.658	289.517	349.999	423.876	508.651	595.94	678.237	750.014	808.418	862.363	921.812	992.144	1073.01	1159.54
OECD Env-Growth	SSP1	MAR	GDP|PPP	billion US$2005/yr	137.293	170.461	224.444	301.042	403.647	534.432	685.827	847.529	1009.17	1166.7	1317.55	1462.52	1595.68	1711.7	1813.53	1902.37	1980.67	2050.66	2106.51
OECD Env-Growth	SSP2	MAR	GDP|PPP	billion US$2005/yr	137.293	171.353	225.655	294.576	376.643	471.593	580.6	700.08	826.476	958.781	1095.93	1240.48	1390	1541.92	1695.31	1849.45	2004.57	2162.48	2322.57
OECD Env-Growth	SSP3	MAR	GDP|PPP	billion US$2005/yr	137.293	173.13	229.157	292.295	357.58	422.199	489.512	557.103	623.929	689.115	753.807	820.887	891.474	965.945	1042.85	1121.25	1201.82	1286.05	1376.51
OECD Env-Growth	SSP4	MAR	GDP|PPP	billion US$2005/yr	137.293	171.057	223.725	286.571	358.178	435.84	517.749	598.836	677.109	750.737	820.704	888.105	951.176	1008.32	1060.26	1107.67	1152.9	1197.91	1242.11
OECD Env-Growth	SSP5	MAR	GDP|PPP	billion US$2005/yr	137.293	169.805	222.697	303.924	420.348	574.517	753.325	945.072	1138.21	1329.17	1515.79	1701.2	1878.28	2041.42	2196.15	2344.34	2490.48	2639.04	2782.02
IIASA GDP	SSP1	MDA	GDP|PPP	billion US$2005/yr	10.7845	14.1496	24.3882	40.4748	56.2728	66.9505	71.5853	72.0436	70.42	68.3661	66.5343	65.1313	64.0662	63.1646	62.2003	61.0832	59.8131	58.4453	57.2271
IIASA GDP	SSP2	MDA	GDP|PPP	billion US$2005/yr	10.7845	14.1805	24.2033	39.4377	53.8843	63.5872	68.1551	69.3119	68.4981	67.0238	65.5315	64.3833	63.5829	63.0393	62.6515	62.4574	62.5904	63.1775	64.2856
IIASA GDP	SSP3	MDA	GDP|PPP	billion US$2005/yr	10.7845	14.2466	24.5131	40.4418	56.0283	67.0965	73.1263	75.9762	77.1526	77.7577	78.2799	79.1398	80.5584	82.6932	85.5493	89.1364	93.4786	98.6193	104.571
IIASA GDP	SSP4	MDA	GDP|PPP	billion US$2005/yr	10.7845	14.1167	23.7188	37.582	49.4944	56.1745	57.9705	56.8659	54.2458	51.1715	48.1237	45.4147	43.0526	40.941	38.9989	37.2379	35.7203	34.4796	33.5105
IIASA GDP	SSP5	MDA	GDP|PPP	billion US$2005/yr	10.7845	14.0958	24.1397	39.7114	54.8549	65.0196	69.3157	69.6605	68.1564	66.2512	64.3775	62.7438	61.3515	60.1025	58.7666	57.2553	55.6011	53.9456	52.6634
OECD Env-Growth	SSP1	MDA	GDP|PPP	billion US$2005/yr	9.951	12.383	15.745	20.625	27.087	34.922	42.874	49.891	55.235	58.888	61.771	64.525	66.404	66.848	66.754	66.214	65.533	64.834	63.972
OECD Env-Growth	SSP2	MDA	GDP|PPP	billion US$2005/yr	9.951	12.399	15.611	19.579	23.964	28.598	33.148	37.247	40.618	43.316	45.924	48.85	51.61	53.804	55.892	57.952	60.18	62.65	65.292
OECD Env-Growth	SSP3	MDA	GDP|PPP	billion US$2005/yr	9.951	12.517	15.896	19.755	23.508	26.863	29.962	32.653	34.834	36.71	38.857	41.575	44.525	47.433	50.46	53.543	56.901	60.626	64.693
OECD Env-Growth	SSP4	MDA	GDP|PPP	billion US$2005/yr	9.951	12.37	15.505	19.358	23.707	28.316	32.801	36.745	39.88	42.299	44.589	47.024	49.056	50.247	51.12	51.73	52.343	53.029	53.632
OECD Env-Growth	SSP5	MDA	GDP|PPP	billion US$2005/yr	9.951	12.285	15.529	20.732	27.969	36.745	45.143	52.106	57.002	60.004	62.097	64.013	64.977	64.555	63.736	62.578	61.557	61.02	60.81
IIASA GDP	SSP1	MDG	GDP|PPP	billion US$2005/yr	15.5469	20.4338	28.3134	38.8733	51.2688	66.2733	84.4634	106.607	133.911	166.765	205.557	250.491	302.047	359.534	422.665	488.968	554.707	615.982	669.501
IIASA GDP	SSP2	MDG	GDP|PPP	billion US$2005/yr	15.5469	19.5174	25.8594	34.1383	43.7645	54.7258	67.0231	80.822	96.6359	114.705	135.294	158.739	185.873	217.432	254.126	296.461	344.839	399.5	460.587
IIASA GDP	SSP3	MDG	GDP|PPP	billion US$2005/yr	15.5469	19.3809	25.2636	32.4969	40.1622	47.8344	55.2213	62.3525	69.5459	76.8138	84.1862	91.6069	99.1429	106.751	114.408	122.02	129.621	137.269	145.113
IIASA GDP	SSP4	MDG	GDP|PPP	billion US$2005/yr	15.5469	19.3403	25.3301	33.0767	42.044	52.0036	62.8151	74.5975	87.8711	102.796	119.561	138.112	158.546	180.817	204.965	230.912	258.809	288.88	321.571
IIASA GDP	SSP5	MDG	GDP|PPP	billion US$2005/yr	15.5469	20.4583	28.675	40.4086	55.4618	75.3051	101.314	135.213	179.458	235.61	305.212	389.263	488.724	602.238	728.733	863.274	998.489	1126.55	1241.81
OECD Env-Growth	SSP1	MDG	GDP|PPP	billion US$2005/yr	17.999	20.059	25.494	35.828	53.376	81.495	123.418	183.158	264.705	370.708	502.29	658.455	837.063	1033.23	1245.31	1467.25	1692.96	1917.33	2133.65
OECD Env-Growth	SSP2	MDG	GDP|PPP	billion US$2005/yr	17.999	20.394	26.182	35.564	49.12	67.633	93.376	128.812	176.683	239.783	321.015	423.129	549.154	701.018	880.704	1089.5	1328.22	1596.87	1895.13
OECD Env-Growth	SSP3	MDG	GDP|PPP	billion US$2005/yr	17.999	20.471	26.477	35.095	46.061	59.119	75.619	96.559	122.666	154.462	192.621	238.058	291.781	354.229	425.663	506.094	595.995	695.881	806.497
OECD Env-Growth	SSP4	MDG	GDP|PPP	billion US$2005/yr	17.999	20.482	26.448	34.654	44.685	55.578	68.609	84.378	103.14	124.938	149.984	178.603	211.2	247.763	288.203	332.357	380.481	432.975	490.481
OECD Env-Growth	SSP5	MDG	GDP|PPP	billion US$2005/yr	17.999	20.058	25.615	37.27	59.274	97.464	156.542	243.131	364.145	524.972	729.153	977.501	1269.28	1599.62	1968.57	2369.13	2793.62	3235.26	3683.8
IIASA GDP	SSP1	MDV	GDP|PPP	billion US$2005/yr	1.76674	1.81553	2.11695	2.45049	2.8337	3.28993	3.82411	4.48461	5.2339	6.1789	7.25445	8.34995	9.29	9.97865	10.3676	10.4528	10.2586	9.90062	9.53497
IIASA GDP	SSP2	MDV	GDP|PPP	billion US$2005/yr	1.76674	1.81168	2.07856	2.34115	2.6222	2.95277	3.34124	3.83121	4.39088	4.97284	5.55701	6.17823	6.83997	7.60989	8.39922	9.10476	9.63012	9.9815	10.2235
IIASA GDP	SSP3	MDV	GDP|PPP	billion US$2005/yr	1.76674	1.87017	2.22198	2.55013	2.83229	3.10045	3.36589	3.67416	3.99536	4.29034	4.5452	4.79044	5.03524	5.26602	5.45485	5.60659	5.75456	5.93671	6.17379
IIASA GDP	SSP4	MDV	GDP|PPP	billion US$2005/yr	1.76674	1.79391	2.00632	2.16764	2.30535	2.4588	2.63874	2.87478	3.13468	3.3762	3.58013	3.76387	3.93136	4.06493	4.13632	4.13732	4.07903	3.99089	3.89827
IIASA GDP	SSP5	MDV	GDP|PPP	billion US$2005/yr	1.76674	1.81773	2.13986	2.52965	3.01903	3.64122	4.40909	5.38573	6.53332	7.9912	9.68514	11.4635	13.0682	14.4229	15.592	16.6096	17.4307	18.0333	18.4988
OECD Env-Growth	SSP1	MDV	GDP|PPP	billion US$2005/yr	2.333	2.791	3.348	4.093	5.095	6.378	7.891	9.542	11.215	12.851	14.492	16.181	17.835	19.339	20.564	21.478	22.123	22.558	22.795
OECD Env-Growth	SSP2	MDV	GDP|PPP	billion US$2005/yr	2.333	2.803	3.383	4.076	4.89	5.821	6.89	8.055	9.262	10.501	11.833	13.321	14.934	16.604	18.238	19.818	21.37	22.949	24.578
OECD Env-Growth	SSP3	MDV	GDP|PPP	billion US$2005/yr	2.333	2.814	3.409	4.057	4.738	5.437	6.18	6.924	7.63	8.298	8.99	9.763	10.601	11.463	12.293	13.108	13.969	14.939	16.044
OECD Env-Growth	SSP4	MDV	GDP|PPP	billion US$2005/yr	2.333	2.792	3.344	3.993	4.786	5.685	6.682	7.712	8.717	9.69	10.688	11.74	12.793	13.773	14.614	15.316	15.911	16.446	16.93
OECD Env-Growth	SSP5	MDV	GDP|PPP	billion US$2005/yr	2.333	2.791	3.355	4.184	5.417	7.112	9.177	11.513	13.983	16.515	19.163	21.998	24.918	27.762	30.335	32.56	34.47	36.134	37.544
IIASA GDP	SSP1	MEX	GDP|PPP	billion US$2005/yr	1293.83	1521.11	1805.32	2174.12	2554.93	2971.11	3409.04	3835.84	4210.45	4535.28	4834.07	5128.52	5427.16	5725.38	6014.82	6282.74	6517.5	6703.22	6820.73
IIASA GDP	SSP2	MEX	GDP|PPP	billion US$2005/yr	1293.83	1521.06	1796.24	2148.79	2518.74	2895.43	3315.37	3765.52	4221.64	4643.77	5026.31	5394.46	5774.11	6174.97	6593.22	7023.21	7457.7	7891.46	8322.95
IIASA GDP	SSP3	MEX	GDP|PPP	billion US$2005/yr	1293.83	1525.1	1806.51	2168.24	2548.09	2939.75	3331.49	3733.27	4177.86	4657.21	5138.82	5609.8	6071.58	6542.45	7032.88	7550.55	8102.04	8693.05	9333.79
IIASA GDP	SSP4	MEX	GDP|PPP	billion US$2005/yr	1293.83	1511.58	1750.25	2020.14	2255.13	2459.06	2633.47	2790.11	2957	3120.21	3258.01	3356.99	3423.6	3465.12	3487.24	3493.54	3491	3485.07	3477.96
IIASA GDP	SSP5	MEX	GDP|PPP	billion US$2005/yr	1293.83	1519.99	1806.2	2184.35	2588.37	3050.73	3557.32	4066.96	4548.96	5021.29	5502.58	6004.92	6530.24	7072.87	7623.34	8166.72	8688.44	9166.18	9570.11
OECD Env-Growth	SSP1	MEX	GDP|PPP	billion US$2005/yr	1409.69	1665.24	1946.47	2290.21	2721.74	3236.93	3793.24	4382.18	4993.56	5607.09	6205.25	6789.16	7332.76	7835.51	8306.6	8729.29	9098.23	9407.47	9631.72
OECD Env-Growth	SSP2	MEX	GDP|PPP	billion US$2005/yr	1409.69	1674.74	1971.21	2303.64	2668.21	3059.46	3474.3	3923.81	4416.92	4948.7	5507.34	6107.38	6739.4	7408.33	8110.12	8840.49	9603.22	10400.5	11226.7
OECD Env-Growth	SSP3	MEX	GDP|PPP	billion US$2005/yr	1409.69	1686.2	2003.38	2332.72	2653.06	2956.28	3240.54	3511.83	3785.06	4064.94	4346.62	4645.35	4956.04	5280.16	5606.53	5930.09	6253.8	6579.62	6910.17
OECD Env-Growth	SSP4	MEX	GDP|PPP	billion US$2005/yr	1409.69	1667.56	1948.3	2251.88	2598.76	2971.87	3349.55	3733.06	4134.69	4553.56	4979.5	5415.28	5841.07	6258.61	6671.11	7072.44	7462.98	7841.75	8200.2
OECD Env-Growth	SSP5	MEX	GDP|PPP	billion US$2005/yr	1409.69	1660.7	1935.7	2303.28	2818.03	3474.5	4196.4	4968.52	5785.35	6631.35	7484.05	8355.9	9216.79	10069.4	10932.4	11786.7	12625.8	13441.6	14194.3
IIASA GDP	SSP1	MKD	GDP|PPP	billion US$2005/yr	15.8791	20.2902	27.187	35.5979	44.2303	52.3437	59.6653	66.158	71.8464	77.1979	82.5616	87.8564	92.841	97.2662	100.985	103.907	105.844	106.738	106.608
IIASA GDP	SSP2	MKD	GDP|PPP	billion US$2005/yr	15.8791	20.2965	27.0994	35.237	43.4382	51.0848	58.0392	64.4294	70.4251	76.2207	82.1147	88.0137	93.7127	99.0435	103.945	108.394	112.406	116.03	119.266
IIASA GDP	SSP3	MKD	GDP|PPP	billion US$2005/yr	15.8791	20.2983	26.9761	34.6375	41.8822	48.0993	53.2786	57.7457	61.8589	65.7815	69.6422	73.4779	77.4139	81.6396	86.2863	91.3675	96.8283	102.622	108.692
IIASA GDP	SSP4	MKD	GDP|PPP	billion US$2005/yr	15.8791	20.2276	26.6553	33.7959	40.2382	45.5428	49.7776	53.1667	55.8856	58.1145	60.0155	61.557	62.6686	63.3562	63.6899	63.7211	63.4787	62.9631	62.1434
IIASA GDP	SSP5	MKD	GDP|PPP	billion US$2005/yr	15.8791	20.3221	27.4677	36.6718	46.9123	57.5313	68.1611	78.5414	89.0676	100.236	112.352	124.949	137.506	149.486	160.516	170.313	178.427	184.55	188.554
OECD Env-Growth	SSP1	MKD	GDP|PPP	billion US$2005/yr	18.931	21.849	26.772	33.14	40.901	49.921	59.198	67.916	75.675	82.746	89.229	94.803	99.066	101.81	103.289	103.817	103.552	102.604	100.9
OECD Env-Growth	SSP2	MKD	GDP|PPP	billion US$2005/yr	18.931	21.878	26.71	32.419	38.807	45.92	53.413	60.865	68.133	75.513	83.096	90.516	97.443	103.591	108.826	113.267	117.027	120.24	122.977
OECD Env-Growth	SSP3	MKD	GDP|PPP	billion US$2005/yr	18.931	21.893	26.555	31.408	36.115	40.665	45.023	48.953	52.505	56.094	59.879	63.843	67.923	71.944	75.64	79.077	82.341	85.528	88.712
OECD Env-Growth	SSP4	MKD	GDP|PPP	billion US$2005/yr	18.931	21.823	26.523	31.969	38.047	44.612	51.224	57.442	63.196	68.885	74.617	79.916	84.408	87.853	90.284	91.847	92.73	93.058	92.771
OECD Env-Growth	SSP5	MKD	GDP|PPP	billion US$2005/yr	18.931	21.866	27.023	34.533	44.479	56.695	69.89	83.267	96.297	109.236	122.226	134.51	145.214	153.888	160.926	166.751	171.52	175.283	177.723
IIASA GDP	SSP1	MLI	GDP|PPP	billion US$2005/yr	13.4228	22.2147	31.3547	43.0029	59.5564	83.0828	114.511	152.987	193.533	236.53	284.7	342.071	409.582	486.23	569.675	656.764	744.269	829.128	908.967
IIASA GDP	SSP2	MLI	GDP|PPP	billion US$2005/yr	13.4228	20.6392	27.2294	37.0873	50.7972	68.3386	88.9968	112.904	140.276	171.224	205.73	244.034	286.72	334.391	387.818	448.054	515.789	591.077	673.939
IIASA GDP	SSP3	MLI	GDP|PPP	billion US$2005/yr	13.4228	19.7416	24.6076	30.2169	36.8426	44.2165	52.048	60.1173	68.2926	76.4743	84.6289	92.8322	101.107	109.567	118.229	127.109	136.168	145.389	154.768
IIASA GDP	SSP4	MLI	GDP|PPP	billion US$2005/yr	13.4228	19.7135	24.6039	30.4462	37.817	46.6728	56.8521	68.1624	80.4931	93.7678	108	123.377	140.02	158.164	177.898	199.308	222.399	247.207	273.789
IIASA GDP	SSP5	MLI	GDP|PPP	billion US$2005/yr	13.4228	22.2246	31.6244	46.5073	68.0104	98.2375	137.676	187.865	244.328	308.49	384.28	477.491	589.861	720.089	864.459	1017.72	1179.03	1356.83	1559.07
OECD Env-Growth	SSP1	MLI	GDP|PPP	billion US$2005/yr	14.86	16.475	22.285	32.523	49.073	74.918	112.9	166.185	237.928	330.607	445.294	581.211	735.117	903.637	1084.88	1275.52	1471.18	1667.84	1859.95
OECD Env-Growth	SSP2	MLI	GDP|PPP	billion US$2005/yr	14.86	16.742	22.314	30.608	42.271	58.035	79.674	109.002	148.148	199.424	265.112	347.561	448.739	570.324	713.877	880.809	1072.01	1288.07	1528.87
OECD Env-Growth	SSP3	MLI	GDP|PPP	billion US$2005/yr	14.86	16.946	22.759	30.437	39.771	50.568	63.523	79.068	97.499	119.006	143.619	171.45	202.345	236.354	273.072	312.391	354.132	398.192	444.79
OECD Env-Growth	SSP4	MLI	GDP|PPP	billion US$2005/yr	14.86	16.926	22.668	30.11	38.826	48.148	58.688	70.63	83.999	98.717	114.59	131.575	149.435	168.137	187.375	207.143	227.44	248.36	270.234
OECD Env-Growth	SSP5	MLI	GDP|PPP	billion US$2005/yr	14.86	16.455	22.271	33.22	52.658	85.457	135.535	207.746	307.055	437.71	602.282	801.507	1032.69	1293.16	1582.95	1899.59	2239.15	2597.72	2968.42
IIASA GDP	SSP1	MLT	GDP|PPP	billion US$2005/yr	8.76495	10.4678	12.7162	15.5095	18.3864	21.1129	23.539	25.6046	27.3087	28.7056	29.8871	30.9031	31.787	32.4829	32.8816	32.9053	32.5527	31.9087	31.1365
IIASA GDP	SSP2	MLT	GDP|PPP	billion US$2005/yr	8.76495	10.4749	12.7172	15.4995	18.3807	21.1332	23.6163	25.7987	27.6903	29.3384	30.8346	32.2242	33.514	34.6862	35.7209	36.6205	37.4307	38.222	39.0635
IIASA GDP	SSP3	MLT	GDP|PPP	billion US$2005/yr	8.76495	9.81296	10.8143	12.0306	13.3747	14.6854	15.9037	17.0693	18.2263	19.3967	20.6037	21.8619	23.1781	24.5745	26.0857	27.7541	29.6175	31.7088	34.0351
IIASA GDP	SSP4	MLT	GDP|PPP	billion US$2005/yr	8.76495	10.4355	12.5305	14.9809	17.294	19.2854	20.8706	22.0622	22.8889	23.4354	23.8106	24.096	24.324	24.4707	24.495	24.3814	24.1625	23.8875	23.6049
IIASA GDP	SSP5	MLT	GDP|PPP	billion US$2005/yr	8.76495	10.4942	12.8542	15.9172	19.2591	22.6374	25.8711	28.8658	31.5853	34.0546	36.3523	38.5052	40.529	42.3324	43.7585	44.6791	45.0541	44.9583	44.5892
OECD Env-Growth	SSP1	MLT	GDP|PPP	billion US$2005/yr	9.442	10.435	11.745	13.398	15.366	17.569	19.653	21.437	22.878	24.037	25.029	25.919	26.674	27.158	27.371	27.347	27.14	26.804	26.347
OECD Env-Growth	SSP2	MLT	GDP|PPP	billion US$2005/yr	9.442	10.446	11.742	13.254	14.938	16.779	18.585	20.246	21.752	23.146	24.522	25.926	27.343	28.653	29.81	30.84	31.78	32.689	33.605
OECD Env-Growth	SSP3	MLT	GDP|PPP	billion US$2005/yr	9.442	10.429	11.659	12.92	14.185	15.472	16.652	17.653	18.499	19.252	20.014	20.862	21.806	22.759	23.665	24.544	25.448	26.423	27.49
OECD Env-Growth	SSP4	MLT	GDP|PPP	billion US$2005/yr	9.442	10.421	11.699	13.264	15.149	17.219	19.134	20.757	22.1	23.244	24.302	25.296	26.19	26.874	27.343	27.626	27.81	27.954	28.046
OECD Env-Growth	SSP5	MLT	GDP|PPP	billion US$2005/yr	9.442	10.457	11.874	13.908	16.554	19.699	22.873	25.865	28.596	31.109	33.53	35.913	38.199	40.173	41.807	43.131	44.198	45.057	45.684
OECD Env-Growth	SSP1	MMR	GDP|PPP	billion US$2005/yr	69.159	91.511	122.894	163.143	214.431	277.17	347.942	424.13	501.736	578.374	652.3	721.62	785.49	841.648	892.353	937.363	977.624	1013.62	1044.44
OECD Env-Growth	SSP2	MMR	GDP|PPP	billion US$2005/yr	69.159	91.977	123.458	156.108	187.778	216.349	245.113	274.625	304.433	334.804	366.171	398.915	434.009	471.223	511.214	554.24	600.348	649.789	703.174
OECD Env-Growth	SSP3	MMR	GDP|PPP	billion US$2005/yr	69.159	92.444	124.57	154.806	179.151	194.731	206.911	216.77	224.201	229.768	234.483	238.996	244.186	249.875	256.038	262.657	269.763	278.003	287.941
OECD Env-Growth	SSP4	MMR	GDP|PPP	billion US$2005/yr	69.159	91.587	121.608	147.717	165.681	171.004	170.326	165.278	156.671	145.814	133.815	121.29	108.856	96.744	85.378	74.826	65.216	56.605	48.922
OECD Env-Growth	SSP5	MMR	GDP|PPP	billion US$2005/yr	69.159	91.344	122.933	168.89	235.433	323.672	424.794	534.778	648.253	762.331	875.118	984.672	1089.96	1188.31	1283.41	1375.43	1466.13	1556.57	1645.25
OECD Env-Growth	SSP1	MNE	GDP|PPP	billion US$2005/yr	6.414	7.033	7.945	9.171	10.693	12.426	14.199	15.854	17.34	18.756	20.135	21.318	22.228	22.852	23.255	23.443	23.455	23.315	22.956
OECD Env-Growth	SSP2	MNE	GDP|PPP	billion US$2005/yr	6.414	7.046	7.964	9.097	10.339	11.624	12.913	14.158	15.368	16.648	18.035	19.381	20.639	21.781	22.808	23.741	24.598	25.395	26.125
OECD Env-Growth	SSP3	MNE	GDP|PPP	billion US$2005/yr	6.414	7.06	7.966	8.923	9.817	10.585	11.264	11.844	12.376	12.975	13.682	14.411	15.156	15.911	16.652	17.386	18.122	18.866	19.625
OECD Env-Growth	SSP4	MNE	GDP|PPP	billion US$2005/yr	6.414	7.028	7.906	8.943	10.084	11.237	12.361	13.404	14.396	15.45	16.591	17.647	18.552	19.282	19.858	20.303	20.64	20.88	20.997
OECD Env-Growth	SSP5	MNE	GDP|PPP	billion US$2005/yr	6.414	7.035	7.968	9.389	11.337	13.723	16.29	18.875	21.4	23.967	26.622	29.13	31.334	33.196	34.777	36.076	37.138	38.001	38.533
IIASA GDP	SSP1	MNG	GDP|PPP	billion US$2005/yr	9.63913	11.8084	15.5378	19.7781	24.3377	29.0479	33.9539	39.2043	44.6052	49.9219	54.9071	59.428	63.452	66.9421	69.8741	72.277	74.2386	75.8007	76.9778
IIASA GDP	SSP2	MNG	GDP|PPP	billion US$2005/yr	9.63913	11.8668	15.3789	18.9104	22.2785	25.5251	28.8515	32.4798	36.342	40.3621	44.4536	48.6409	52.937	57.3271	61.7273	66.0378	70.2069	74.2245	78.0602
IIASA GDP	SSP3	MNG	GDP|PPP	billion US$2005/yr	9.63913	11.8678	15.1704	18.1254	20.5118	22.4312	24.1093	25.7831	27.4298	29.0308	30.559	32.0763	33.6726	35.4269	37.312	39.261	41.2276	43.2167	45.2634
IIASA GDP	SSP4	MNG	GDP|PPP	billion US$2005/yr	9.63913	11.7739	14.8646	17.5073	19.5475	21.1797	22.6575	24.176	25.6477	27.0578	28.399	29.7438	31.1365	32.5467	33.8889	35.0963	36.1495	37.0355	37.7282
IIASA GDP	SSP5	MNG	GDP|PPP	billion US$2005/yr	9.63913	11.8167	15.6905	20.3926	25.9097	32.148	39.1611	47.0721	55.5846	64.3496	72.9991	81.2959	89.1045	96.2693	103.355	111.264	120.597	131.362	143.248
OECD Env-Growth	SSP1	MNG	GDP|PPP	billion US$2005/yr	9.977	17.665	28.246	42.016	60.209	82.224	105.504	127.824	147.597	164.694	180.4	194.795	206.864	214.884	220.515	224.568	227.832	230.445	231.603
OECD Env-Growth	SSP2	MNG	GDP|PPP	billion US$2005/yr	9.977	17.764	28.214	39.958	53.374	68.422	84.925	102.031	118.996	135.697	153.09	171.278	189.465	206.02	221.432	236.144	250.728	265.261	278.961
OECD Env-Growth	SSP3	MNG	GDP|PPP	billion US$2005/yr	9.977	17.882	28.366	38.831	49.304	59.601	70.332	81.078	91.58	101.973	113.126	125.281	138.047	150.464	162.594	174.562	186.771	199.291	211.809
OECD Env-Growth	SSP4	MNG	GDP|PPP	billion US$2005/yr	9.977	17.688	27.912	39.27	52.38	66.813	82.093	97.226	111.492	124.734	137.779	150.47	161.999	170.985	178.324	184.445	189.928	194.845	198.521
OECD Env-Growth	SSP5	MNG	GDP|PPP	billion US$2005/yr	9.977	17.647	28.571	44.447	67.015	95.056	124.581	153.23	179.463	203.435	226.891	250.022	271.462	288.788	303.963	317.888	331.574	345.215	357.515
IIASA GDP	SSP1	MOZ	GDP|PPP	billion US$2005/yr	16.6489	26.5617	36.9612	49.6742	64.9994	84.1469	106.513	133.444	167.065	210.409	265.234	332.126	410.416	498.027	591.884	687.866	781.647	869.128	947.347
IIASA GDP	SSP2	MOZ	GDP|PPP	billion US$2005/yr	16.6489	25.6814	34.1741	43.658	54.4691	67.1896	82.6027	101.332	123.71	150.035	180.955	217.235	259.178	308.411	366.547	434.653	512.66	599.809	694.901
IIASA GDP	SSP3	MOZ	GDP|PPP	billion US$2005/yr	16.6489	25.2113	32.2648	38.8524	45.2023	51.4642	57.8873	64.5403	71.1782	77.784	84.4628	91.1782	98.0035	104.939	112.113	119.562	127.325	135.451	144.058
IIASA GDP	SSP4	MOZ	GDP|PPP	billion US$2005/yr	16.6489	25.1436	32.2677	39.2787	46.6862	54.7415	63.8718	74.2744	85.8523	98.6822	112.975	128.672	145.853	164.513	184.904	207.186	231.554	258.231	287.572
IIASA GDP	SSP5	MOZ	GDP|PPP	billion US$2005/yr	16.6489	26.5914	37.3926	51.4532	69.7897	94.4247	125.53	165.503	218.011	288.422	380.946	498.127	640.047	803.601	983.055	1170.28	1358.39	1555.66	1771.04
OECD Env-Growth	SSP1	MOZ	GDP|PPP	billion US$2005/yr	19.244	27.351	39.304	57.507	85.732	128.69	191.293	279.991	400.98	558.977	756.764	993.203	1264.15	1564.39	1890.63	2233.93	2584.16	2932.37	3268.62
OECD Env-Growth	SSP2	MOZ	GDP|PPP	billion US$2005/yr	19.244	27.736	39.953	55.859	75.961	101.022	134.025	177.98	235.934	311.159	407.125	527.298	675.099	854.217	1068.7	1321.48	1614.31	1948.25	2323.68
OECD Env-Growth	SSP3	MOZ	GDP|PPP	billion US$2005/yr	19.244	27.851	40.039	53.995	68.76	83.573	100.432	120.376	143.52	170.187	200.43	234.101	271.945	313.887	360.117	410.672	465.627	525.49	590.756
OECD Env-Growth	SSP4	MOZ	GDP|PPP	billion US$2005/yr	19.244	27.851	39.959	53.376	66.803	78.704	91.251	105.208	120.416	136.915	154.553	173.1	193.012	214.129	236.533	260.259	285.44	312.519	341.965
OECD Env-Growth	SSP5	MOZ	GDP|PPP	billion US$2005/yr	19.244	27.346	39.459	59.553	94.218	151.51	238.128	364.126	539.76	773.784	1072.85	1438.95	1869.86	2361.74	2913.98	3516.95	4158.31	4826.34	5506.24
IIASA GDP	SSP1	MRT	GDP|PPP	billion US$2005/yr	4.93804	7.15003	9.24647	11.8961	15.2452	19.2267	24.0598	30.0785	37.5585	46.6084	57.0893	68.6381	80.738	92.7948	104.312	114.933	124.484	132.891	140.164
IIASA GDP	SSP2	MRT	GDP|PPP	billion US$2005/yr	4.93804	7.16768	9.17735	11.4904	14.1832	17.3685	21.1669	25.7794	31.3168	37.6364	44.8664	53.1805	62.7333	73.4674	85.2167	97.7444	110.818	124.125	137.382
IIASA GDP	SSP3	MRT	GDP|PPP	billion US$2005/yr	4.93804	7.17454	9.02744	10.8403	12.5642	14.2659	16.0056	17.8744	19.8759	22.0565	24.3761	26.7972	29.2776	31.8367	34.5034	37.2943	40.2448	43.3818	46.7699
IIASA GDP	SSP4	MRT	GDP|PPP	billion US$2005/yr	4.93804	7.16165	9.01216	10.9168	12.9089	15.0969	17.565	20.438	23.7696	27.679	31.8015	36.1811	40.9429	46.3739	52.5621	59.5565	67.3729	76.0213	85.5269
IIASA GDP	SSP5	MRT	GDP|PPP	billion US$2005/yr	4.93804	7.16145	9.36827	12.358	16.4342	21.6553	28.3881	37.1636	48.4877	62.6702	79.6766	99.0553	119.988	141.42	162.393	182.199	202.967	226.753	254.687
OECD Env-Growth	SSP1	MRT	GDP|PPP	billion US$2005/yr	7.624	9.936	13.068	17.188	22.937	30.696	40.495	52.6	67.055	83.667	102.208	122.161	142.729	163.305	183.88	204.052	223.579	242.067	258.939
OECD Env-Growth	SSP2	MRT	GDP|PPP	billion US$2005/yr	7.624	10.03	13.105	16.987	21.909	28.099	35.852	45.595	57.619	72.11	89.206	108.837	130.828	155.058	181.521	210.03	240.287	271.813	304.214
OECD Env-Growth	SSP3	MRT	GDP|PPP	billion US$2005/yr	7.624	10.053	13.133	16.698	20.629	25.004	30.037	35.95	42.793	50.548	59.195	68.739	79.139	90.481	102.704	115.699	129.439	143.882	159.167
OECD Env-Growth	SSP4	MRT	GDP|PPP	billion US$2005/yr	7.624	10.061	13.149	16.659	20.559	24.813	29.724	35.539	42.335	50.122	58.908	68.714	79.523	91.444	104.427	118.367	133.253	149.072	166.006
OECD Env-Growth	SSP5	MRT	GDP|PPP	billion US$2005/yr	7.624	9.94	13.134	17.682	24.546	34.349	47.142	63.46	83.607	107.6	135.411	166.604	200.297	235.756	273.03	311.604	351.145	391.034	430.264
IIASA GDP	SSP1	MUS	GDP|PPP	billion US$2005/yr	12.1808	13.8088	14.7333	15.3387	16.1898	17.5228	19.5047	21.9705	25.0329	28.4153	31.827	34.9827	38.7639	42.8406	46.9842	50.7411	54.0687	56.7792	58.8119
IIASA GDP	SSP2	MUS	GDP|PPP	billion US$2005/yr	12.1808	13.606	14.1276	14.2829	14.7053	15.5749	16.9818	18.8095	21.0573	23.5986	26.3866	29.4302	32.7131	36.2606	40.0065	43.7418	48.4968	54.138	60.3399
IIASA GDP	SSP3	MUS	GDP|PPP	billion US$2005/yr	12.1808	13.7665	14.4818	14.7305	15.0744	15.6894	16.6388	17.793	19.0827	20.3981	21.7565	23.2444	24.9157	26.8251	28.9399	31.1777	33.5229	36.0324	38.8242
IIASA GDP	SSP4	MUS	GDP|PPP	billion US$2005/yr	12.1808	13.3765	13.43	12.9673	12.677	12.6951	13.036	13.5383	14.1126	14.6383	15.0922	15.4805	15.8053	16.0955	16.3717	16.5932	16.7511	16.8552	16.923
IIASA GDP	SSP5	MUS	GDP|PPP	billion US$2005/yr	12.1808	13.828	14.8641	15.7212	16.9855	18.9127	21.7155	25.2601	29.6913	34.7063	39.953	45.0136	51.3343	58.9627	67.5259	76.0575	84.1255	91.2879	97.3491
OECD Env-Growth	SSP1	MUS	GDP|PPP	billion US$2005/yr	15.734	19.023	23.714	29.477	36.154	43.523	51.137	58.724	66.158	72.951	79.073	84.512	89.116	93.185	96.822	99.783	102.063	103.718	104.725
OECD Env-Growth	SSP2	MUS	GDP|PPP	billion US$2005/yr	15.734	19.071	23.742	28.783	33.76	38.609	43.497	48.479	53.749	59.01	64.343	69.837	75.492	81.515	87.844	94.294	100.814	107.419	114.196
OECD Env-Growth	SSP3	MUS	GDP|PPP	billion US$2005/yr	15.734	19.103	23.764	28.27	32.124	35.303	38.137	40.755	43.392	45.788	48.068	50.404	52.874	55.642	58.583	61.58	64.68	67.96	71.53
OECD Env-Growth	SSP4	MUS	GDP|PPP	billion US$2005/yr	15.734	19.017	23.554	28.205	32.825	37.144	41.109	44.669	48.058	50.98	53.537	55.748	57.563	59.197	60.684	61.893	62.918	63.836	64.647
OECD Env-Growth	SSP5	MUS	GDP|PPP	billion US$2005/yr	15.734	19.026	23.85	30.389	38.741	48.647	59.307	70.434	81.891	93.135	104.132	114.768	124.738	134.291	143.558	152.244	160.299	167.734	174.4
IIASA GDP	SSP1	MWI	GDP|PPP	billion US$2005/yr	9.80357	13.327	19.1871	27.4685	39.2165	55.3338	76.8025	104.578	140.204	185.094	241.108	309.582	391.126	484.394	586.862	695.335	806.798	918.359	1027.5
IIASA GDP	SSP2	MWI	GDP|PPP	billion US$2005/yr	9.80357	13.176	18.4592	25.4393	34.96	47.6217	63.9518	84.4169	109.932	141.335	179.503	225.434	280.078	344.156	419.346	507.41	609.648	726.68	858.359
IIASA GDP	SSP3	MWI	GDP|PPP	billion US$2005/yr	9.80357	13.0986	17.8945	23.5684	30.5604	39.0254	48.9316	60.2053	72.9863	87.3474	103.264	120.639	139.373	159.244	180.09	201.823	224.559	248.264	273.161
IIASA GDP	SSP4	MWI	GDP|PPP	billion US$2005/yr	9.80357	13.0614	17.8775	23.7524	31.3598	41.1066	53.361	68.471	87.0896	109.836	137.253	169.729	207.584	250.914	299.889	354.811	416.321	484.802	561.147
IIASA GDP	SSP5	MWI	GDP|PPP	billion US$2005/yr	9.80357	13.3405	19.4115	28.4693	42.1824	62.3128	90.9804	130.514	184.187	255.494	348.658	467.156	612.954	784.382	977.059	1184.92	1401.88	1638.09	1908.38
OECD Env-Growth	SSP1	MWI	GDP|PPP	billion US$2005/yr	11.854	15.061	20.813	30.64	46.974	73.415	113.895	173.505	258.178	373.542	524.57	714.377	943.954	1210.43	1511.66	1842.32	2195.72	2563.88	2936.04
OECD Env-Growth	SSP2	MWI	GDP|PPP	billion US$2005/yr	11.854	15.257	20.976	29.445	41.371	57.617	80.413	112.336	156.572	217.041	298.262	405.631	544.911	721.484	940.869	1208.01	1526.91	1899.21	2325.36
OECD Env-Growth	SSP3	MWI	GDP|PPP	billion US$2005/yr	11.854	15.343	21.205	29.014	38.805	50.395	65.132	84.106	108.361	139.175	177.947	226.344	285.918	358.017	443.674	543.923	660.068	792.674	942.806
OECD Env-Growth	SSP4	MWI	GDP|PPP	billion US$2005/yr	11.854	15.337	21.129	28.542	37.508	47.183	58.744	72.81	89.818	110.269	134.654	163.614	197.602	236.888	281.552	331.775	388.018	450.466	519.775
OECD Env-Growth	SSP5	MWI	GDP|PPP	billion US$2005/yr	11.854	15.056	20.867	31.606	51.484	86.452	142.146	226.484	348.843	518.56	744.51	1033.94	1391.52	1816.92	2311.55	2872.06	3492.93	4166.34	4878.87
IIASA GDP	SSP1	MYS	GDP|PPP	billion US$2005/yr	314.586	376.7	438.326	515.115	610.223	719.882	836.227	948.967	1051.05	1139.3	1214.06	1279.12	1345.36	1418.83	1500.47	1586.74	1671.26	1747.65	1812.04
IIASA GDP	SSP2	MYS	GDP|PPP	billion US$2005/yr	314.586	377.352	438.187	512.215	603.493	709.686	824.039	938.243	1046.86	1146.93	1238.41	1322.14	1399.25	1472.65	1548.53	1630.68	1719.04	1812.04	1908.56
IIASA GDP	SSP3	MYS	GDP|PPP	billion US$2005/yr	314.586	376.926	432.138	493.884	566.484	649.169	737.169	825.459	912.131	997.467	1082.96	1169.95	1259.02	1351.18	1447.51	1548.68	1654.81	1766	1882.41
IIASA GDP	SSP4	MYS	GDP|PPP	billion US$2005/yr	314.586	373.74	421.331	469.651	522.254	579.918	639.773	697.079	748.32	792.742	831.363	865.638	896.312	922.49	943.047	957.335	965.371	967.37	964.103
IIASA GDP	SSP5	MYS	GDP|PPP	billion US$2005/yr	314.586	377.28	442.775	529.624	643.371	781.036	933.823	1088.72	1235.53	1373.5	1516.59	1676.33	1858.62	2061.4	2280.23	2509.1	2738.1	2956.47	3156.52
OECD Env-Growth	SSP1	MYS	GDP|PPP	billion US$2005/yr	375.288	473.023	595.358	750.517	941.212	1163.76	1398.23	1627.45	1853.73	2083.32	2310.05	2522.88	2715.66	2890.39	3047.03	3184.06	3297.97	3385.78	3443.99
OECD Env-Growth	SSP2	MYS	GDP|PPP	billion US$2005/yr	375.288	475.181	599.206	742.319	903.265	1080.85	1273.88	1474.86	1683.41	1906.08	2139.6	2376.83	2616.04	2858.69	3099.52	3335.68	3565.91	3788.47	4002.28
OECD Env-Growth	SSP3	MYS	GDP|PPP	billion US$2005/yr	375.288	476.924	602.209	732.864	864.718	997.569	1134.09	1267.41	1399.76	1541.45	1692.59	1851.13	2018.32	2197.24	2383.35	2572.84	2764.41	2957.85	3155.66
OECD Env-Growth	SSP4	MYS	GDP|PPP	billion US$2005/yr	375.288	473.077	591.867	723.911	875.493	1040.73	1213.7	1383.64	1549.6	1721.22	1896.95	2067.07	2226.65	2377.11	2517.62	2646.24	2762.73	2866.33	2954.3
OECD Env-Growth	SSP5	MYS	GDP|PPP	billion US$2005/yr	375.288	473.27	598.071	767.266	991.482	1267.06	1572.36	1893.96	2225.77	2576.09	2942.48	3312.75	3677.49	4038.04	4393.16	4739.33	5069.39	5376.09	5650.17
IIASA GDP	SSP1	NAM	GDP|PPP	billion US$2005/yr	9.99074	13.1871	16.7474	21.6535	27.7711	34.9046	42.825	51.1843	59.6353	67.9121	75.7413	82.9054	89.2804	94.7442	99.3846	103.827	108.469	113.343	118.222
IIASA GDP	SSP2	NAM	GDP|PPP	billion US$2005/yr	9.99074	13.1689	16.3426	20.3538	24.954	30.1082	35.9104	42.2878	49.0955	56.1779	63.4515	70.7932	78.0529	85.0955	91.7692	97.9437	103.537	108.614	113.602
IIASA GDP	SSP3	NAM	GDP|PPP	billion US$2005/yr	9.99074	13.0266	15.5938	18.4805	21.512	24.7398	28.0672	31.3669	34.4485	37.2502	39.8706	42.4161	45.0132	47.5681	50.225	53.047	56.0489	59.2653	62.7256
IIASA GDP	SSP4	NAM	GDP|PPP	billion US$2005/yr	9.99074	12.9912	15.5164	18.3588	21.3753	24.6487	28.1663	31.8671	35.5977	39.3017	43.0793	46.9938	51.1134	55.2582	59.5522	64.0575	68.7817	73.7468	78.9529
IIASA GDP	SSP5	NAM	GDP|PPP	billion US$2005/yr	9.99074	13.2022	16.9061	22.2536	29.3114	38.0341	48.2747	59.6657	71.7547	84.1401	96.3923	108.242	120.574	134.093	149.086	165.251	182.156	199.271	216.126
OECD Env-Growth	SSP1	NAM	GDP|PPP	billion US$2005/yr	13.403	16.166	20.028	25.491	32.724	41.408	51.233	61.94	73.161	84.541	95.782	106.583	116.627	125.78	134.27	141.795	148.356	153.95	158.463
OECD Env-Growth	SSP2	NAM	GDP|PPP	billion US$2005/yr	13.403	16.272	20.147	25.135	31.085	37.651	44.952	52.985	61.692	70.963	80.703	90.859	101.358	112.082	123.01	133.952	144.785	155.551	166.236
OECD Env-Growth	SSP3	NAM	GDP|PPP	billion US$2005/yr	13.403	16.302	20.154	24.617	29.318	33.869	38.555	43.406	48.424	53.498	58.58	63.667	68.913	74.178	79.602	85.14	90.752	96.612	102.813
OECD Env-Growth	SSP4	NAM	GDP|PPP	billion US$2005/yr	13.403	16.304	20.203	24.848	30.293	36.14	42.61	49.769	57.667	66.186	75.27	84.915	95.35	106.401	118.259	130.842	144.092	158.315	173.721
OECD Env-Growth	SSP5	NAM	GDP|PPP	billion US$2005/yr	13.403	16.164	20.071	26.011	34.548	45.523	58.397	72.928	88.756	105.525	122.931	140.63	158.202	175.424	192.58	209.199	225.215	240.537	254.875
OECD Env-Growth	SSP1	NCL	GDP|PPP	billion US$2005/yr	4.25	5.32	6.461	7.81	9.394	11.151	12.981	14.804	16.523	18.134	19.607	20.939	22.087	23.032	23.843	24.513	25.058	25.488	25.776
OECD Env-Growth	SSP2	NCL	GDP|PPP	billion US$2005/yr	4.25	5.307	6.406	7.594	8.846	10.114	11.432	12.78	14.113	15.45	16.793	18.143	19.476	20.768	22.023	23.238	24.424	25.598	26.753
OECD Env-Growth	SSP3	NCL	GDP|PPP	billion US$2005/yr	4.25	5.263	6.227	7.16	8.057	8.882	9.692	10.489	11.255	12.011	12.755	13.507	14.273	15.041	15.797	16.542	17.28	18.019	18.77
OECD Env-Growth	SSP4	NCL	GDP|PPP	billion US$2005/yr	4.25	5.244	6.252	7.413	8.821	10.381	12.007	13.649	15.247	16.816	18.335	19.783	21.112	22.294	23.369	24.324	25.182	25.949	26.599
OECD Env-Growth	SSP5	NCL	GDP|PPP	billion US$2005/yr	4.25	5.353	6.624	8.336	10.579	13.277	16.22	19.309	22.41	25.504	28.555	31.532	34.35	36.958	39.437	41.777	43.993	46.087	47.994
IIASA GDP	SSP1	NER	GDP|PPP	billion US$2005/yr	8.17434	11.5489	16.7558	24.4555	34.6181	48.2677	66.7859	91.5705	124.013	164.89	214.806	274.542	345.31	427.907	522.611	627.149	739.355	856.417	975.693
IIASA GDP	SSP2	NER	GDP|PPP	billion US$2005/yr	8.17434	10.5865	14.3785	20.1284	28.0683	38.3044	51.4855	68.3157	89.753	116.466	148.905	187.911	234.944	291.833	360.184	441.34	536.273	645.195	768.304
IIASA GDP	SSP3	NER	GDP|PPP	billion US$2005/yr	8.17434	10.178	12.424	16.0757	21.4975	28.6476	37.0615	46.5119	56.9738	68.4136	80.7577	93.8491	107.702	122.186	137.231	152.685	168.337	184.017	199.512
IIASA GDP	SSP4	NER	GDP|PPP	billion US$2005/yr	8.17434	10.1637	12.4658	15.7106	20.3553	27.6026	38.0434	51.9743	69.2879	90.1171	114.604	142.795	175.017	211.405	252.208	297.521	347.259	401.319	459.398
IIASA GDP	SSP5	NER	GDP|PPP	billion US$2005/yr	8.17434	11.5603	16.9563	25.3751	37.3339	54.6044	79.6623	115.389	165.018	231.174	316.287	422.864	553.736	710.696	894.535	1101.38	1326.89	1565.28	1817.48
OECD Env-Growth	SSP1	NER	GDP|PPP	billion US$2005/yr	10.085	14.142	18.914	27.191	41.082	63.837	99.438	153.127	231.559	341.796	490.506	683.201	923.13	1210.69	1545.64	1924.05	2339.17	2782.89	3242.97
OECD Env-Growth	SSP2	NER	GDP|PPP	billion US$2005/yr	10.085	14.406	19.323	26.492	36.765	51.158	72.001	102.233	146.041	208.906	297.737	420.987	587.438	806	1085.78	1436.45	1867.51	2385.78	2994.72
OECD Env-Growth	SSP3	NER	GDP|PPP	billion US$2005/yr	10.085	14.517	19.627	26.245	34.607	44.783	57.989	75.254	97.681	126.616	163.571	210.231	268.398	339.321	424.256	524.203	639.739	771.872	920.494
OECD Env-Growth	SSP4	NER	GDP|PPP	billion US$2005/yr	10.085	14.511	19.584	26.002	33.774	42.45	53.044	66.115	82.125	101.608	125.084	153.106	186.181	224.38	267.828	316.589	370.619	430.312	495.633
OECD Env-Growth	SSP5	NER	GDP|PPP	billion US$2005/yr	10.085	14.136	18.946	27.921	44.547	74.09	122.282	197.237	309.343	470.034	690.774	982.512	1353.72	1809.56	2355.45	2991.71	3714.71	4518.64	5390.24
IIASA GDP	SSP1	NGA	GDP|PPP	billion US$2005/yr	303.562	497.871	720.877	984.327	1319.1	1753.42	2321.47	3035.15	3886.33	4840.54	5848.01	6858.65	7843.4	8786.95	9686.19	10541.9	11356.2	12127.3	12850.1
IIASA GDP	SSP2	NGA	GDP|PPP	billion US$2005/yr	303.562	494.95	701.51	933.099	1212.98	1565.4	2018.59	2592.44	3295.86	4115.28	5023.46	5994.4	7001.22	8027.83	9065.6	10104.6	11126.5	12128.1	13109.6
IIASA GDP	SSP3	NGA	GDP|PPP	billion US$2005/yr	303.562	491.317	672.527	840.725	1017.7	1219.66	1454.01	1725.15	2038.66	2383.02	2740.17	3096.75	3445.81	3788.12	4121.12	4450.04	4772.93	5089.2	5399.54
IIASA GDP	SSP4	NGA	GDP|PPP	billion US$2005/yr	303.562	488.453	669.35	845.036	1043.27	1284.11	1582.58	1952.03	2410.43	2954.96	3500.88	4035.07	4576.57	5173.07	5837.73	6578.08	7385.35	8252.7	9170.4
IIASA GDP	SSP5	NGA	GDP|PPP	billion US$2005/yr	303.562	498.36	728.728	1017.55	1410.39	1951.81	2695.68	3671.61	4881.98	6291.36	7838.39	9452.35	11082.4	12693.4	14375.1	16286.3	18546	21187.9	24186.2
OECD Env-Growth	SSP1	NGA	GDP|PPP	billion US$2005/yr	338.225	462.557	636.006	896.583	1290.38	1853.29	2634.13	3681.43	5040	6755.19	8860.88	11359.8	14217.6	17383.4	20817.4	24449	28200	31996.1	35724
OECD Env-Growth	SSP2	NGA	GDP|PPP	billion US$2005/yr	338.225	466.265	642.968	880.184	1192.73	1592.47	2117.56	2805.84	3701.92	4860.51	6331.15	8158.04	10377.8	13013.4	16069.8	19545.2	23435.7	27710	32322.6
OECD Env-Growth	SSP3	NGA	GDP|PPP	billion US$2005/yr	338.225	470.453	651.218	871.104	1131.59	1422.88	1757.6	2144.59	2601.8	3152.72	3815.1	4603.52	5530.63	6619.27	7863.84	9265.88	10809.8	12489.6	14301.8
OECD Env-Growth	SSP4	NGA	GDP|PPP	billion US$2005/yr	338.225	470.333	649.365	859.062	1100.24	1351.46	1626.4	1930.24	2275.96	2679.34	3148.24	3685.96	4298.23	4998.46	5778.26	6637.62	7563.98	8555.11	9613.32
OECD Env-Growth	SSP5	NGA	GDP|PPP	billion US$2005/yr	338.225	462.39	638.004	924.894	1400.57	2142.16	3191.68	4616.39	6494.05	8914.03	11957.2	15670.1	20057	25104.9	30814.6	37134.8	43995.1	51320.7	58959.4
IIASA GDP	SSP1	NIC	GDP|PPP	billion US$2005/yr	12.1323	14.7376	17.7701	21.7431	26.6165	32.3665	38.9373	46.1668	54.0547	63.6464	74.4898	85.6469	95.9325	104.871	112.364	118.518	123.449	127.172	129.466
IIASA GDP	SSP2	NIC	GDP|PPP	billion US$2005/yr	12.1323	14.5452	16.9339	19.7881	23.1613	27.1283	31.683	36.821	42.5545	48.9409	55.7868	63.2005	71.3302	81.7061	93.9167	106.964	119.504	131.106	141.83
IIASA GDP	SSP3	NIC	GDP|PPP	billion US$2005/yr	12.1323	14.4618	16.5327	18.7778	21.2089	23.8305	26.5126	29.1615	31.7376	34.3294	36.9559	39.7528	42.8496	46.2664	49.9337	53.7798	57.838	62.1529	66.8054
IIASA GDP	SSP4	NIC	GDP|PPP	billion US$2005/yr	12.1323	14.2674	15.9125	17.4276	18.8714	20.3296	21.8139	23.298	24.7655	26.2221	27.6031	28.9617	30.3682	31.8386	33.3611	34.887	36.4115	37.9507	39.4721
IIASA GDP	SSP5	NIC	GDP|PPP	billion US$2005/yr	12.1323	14.6862	17.6435	21.5226	26.3718	32.2358	39.1117	46.8177	55.303	65.8036	77.6235	89.5938	100.323	109.457	117.084	124.599	133.588	144.895	158.257
OECD Env-Growth	SSP1	NIC	GDP|PPP	billion US$2005/yr	14.467	17.204	20.776	27.092	36.746	50.16	67.175	87.181	109.539	133.736	158.676	184.273	209.768	234.405	258.619	282.077	304.437	325.3	343.916
OECD Env-Growth	SSP2	NIC	GDP|PPP	billion US$2005/yr	14.467	17.344	21.08	26.924	34.686	44.298	56.034	69.856	85.863	104.133	124.391	147.145	172.438	200.047	230.004	262.368	297.19	334.411	373.899
OECD Env-Growth	SSP3	NIC	GDP|PPP	billion US$2005/yr	14.467	17.591	21.778	27.608	34.465	41.984	50.44	59.72	69.85	80.954	93.029	106.479	121.397	137.691	155.251	174.014	194.216	215.971	239.426
OECD Env-Growth	SSP4	NIC	GDP|PPP	billion US$2005/yr	14.467	17.301	20.811	25.532	30.866	35.965	41.069	45.916	50.471	54.789	58.708	62.379	65.735	68.688	71.31	73.616	75.724	77.691	79.484
OECD Env-Growth	SSP5	NIC	GDP|PPP	billion US$2005/yr	14.467	17.095	20.421	26.765	37.238	52.373	71.377	93.377	117.508	143.171	169.075	195.653	222.201	248.439	275.834	304.182	333.749	364.656	396.477
IIASA GDP	SSP1	NLD	GDP|PPP	billion US$2005/yr	678.247	749.925	844.9	954.019	1069.6	1186.75	1304.82	1422.99	1541.27	1659.63	1779.41	1901.15	2025.08	2150.36	2277.74	2405.83	2529.65	2645.35	2754.34
IIASA GDP	SSP2	NLD	GDP|PPP	billion US$2005/yr	678.247	751.579	846.489	951.154	1056.78	1159.57	1259.97	1358.24	1455.65	1553.25	1652.5	1753.74	1857.53	1964.28	2073.84	2185.03	2295.32	2402.62	2504.99
IIASA GDP	SSP3	NLD	GDP|PPP	billion US$2005/yr	678.247	736.218	798.767	857.032	909.383	955.196	995.796	1030.91	1061.76	1090.04	1117.18	1143.8	1170.66	1197.06	1221.59	1243.03	1260.7	1274.38	1284.43
IIASA GDP	SSP4	NLD	GDP|PPP	billion US$2005/yr	678.247	751.556	843.975	941.911	1034.01	1117.07	1192.86	1262.8	1328.92	1393.21	1456.93	1519.62	1581.61	1642.37	1701.55	1758.34	1811.04	1857.18	1893.93
IIASA GDP	SSP5	NLD	GDP|PPP	billion US$2005/yr	678.247	752.448	855.943	983.173	1129.13	1289.3	1463.2	1650.99	1852.88	2069.11	2302.51	2555.66	2829.25	3122.9	3438.04	3774.58	4128.99	4499.64	4890.54
OECD Env-Growth	SSP1	NLD	GDP|PPP	billion US$2005/yr	614.809	659.584	722.299	785.847	856.522	933.473	1017.26	1105.62	1192.76	1278.62	1366.53	1456.42	1546.36	1637.77	1730.8	1822.56	1910.91	1995.07	2075.31
OECD Env-Growth	SSP2	NLD	GDP|PPP	billion US$2005/yr	614.809	658.651	719.395	778.274	839.554	904.619	978.392	1060.65	1146.38	1233.87	1325.27	1419.91	1516.65	1618.08	1723.63	1831.65	1940.63	2049.94	2158.22
OECD Env-Growth	SSP3	NLD	GDP|PPP	billion US$2005/yr	614.809	655.181	707.919	749.146	782.224	808.524	833.328	856.261	873.567	884.953	894.041	900.911	903.352	903.659	902.286	898.099	891.559	883.173	872.042
OECD Env-Growth	SSP4	NLD	GDP|PPP	billion US$2005/yr	614.809	657.146	715.147	772.461	833.615	896.976	963.576	1033.16	1101.36	1166.87	1232.93	1297.96	1359.29	1419	1478.36	1535.91	1591.32	1644.42	1691.34
OECD Env-Growth	SSP5	NLD	GDP|PPP	billion US$2005/yr	614.809	662.127	730.816	811.999	913.181	1031.75	1168.59	1326.11	1500.6	1694.04	1911.8	2156.28	2430.02	2737.76	3079.63	3453.26	3856.41	4289.59	4760.22
IIASA GDP	SSP1	NOR	GDP|PPP	billion US$2005/yr	232.939	274.994	318.665	373.956	432.447	491.73	551.1	611.062	671.845	734.385	799.94	868.389	938.571	1008.8	1078.6	1147.49	1214.21	1278.26	1339.8
IIASA GDP	SSP2	NOR	GDP|PPP	billion US$2005/yr	232.939	275.003	318.007	371.351	426.233	480.121	532.489	584.314	636.298	689.521	744.845	801.868	859.863	918.213	976.711	1035.16	1092.97	1149.51	1203.64
IIASA GDP	SSP3	NOR	GDP|PPP	billion US$2005/yr	232.939	260.738	276.331	292.511	308.367	323.866	339.3	354.899	370.493	386.157	401.675	416.584	430.797	444.022	455.926	466.115	474.417	480.768	485.194
IIASA GDP	SSP4	NOR	GDP|PPP	billion US$2005/yr	232.939	275.666	319.668	373.551	426.615	475.877	521.557	565.475	608.565	651.783	695.252	737.772	778.521	816.606	851.558	882.914	909.964	931.877	947.508
IIASA GDP	SSP5	NOR	GDP|PPP	billion US$2005/yr	232.939	276.606	325.535	392.207	469.287	554.095	645.281	743.53	849.442	964.772	1092.15	1232.42	1384.04	1544.99	1714.96	1894.27	2082.55	2280.17	2487.97
OECD Env-Growth	SSP1	NOR	GDP|PPP	billion US$2005/yr	228.255	257.766	291.04	319.291	353.349	390.371	425.168	459.775	497.539	539.052	583.437	631.301	682.022	733.272	785.557	836.723	886.14	934.085	981.062
OECD Env-Growth	SSP2	NOR	GDP|PPP	billion US$2005/yr	228.255	257.379	288.961	312.551	337.963	363.873	389.559	416.731	449.452	488.012	530.901	578.262	629.908	683.969	740.62	798.482	857.001	916.111	975.711
OECD Env-Growth	SSP3	NOR	GDP|PPP	billion US$2005/yr	228.255	254.75	280.912	297.962	314.712	329.371	337.46	339.07	340.923	345.527	351.7	359.359	367.447	374.032	379.688	383.551	385.89	387.122	386.698
OECD Env-Growth	SSP4	NOR	GDP|PPP	billion US$2005/yr	228.255	256.629	287.098	314.815	349.325	387.645	421.448	450.161	479.803	512.709	548.033	585.544	624.147	661.086	697.42	731.668	763.747	793.798	820.187
OECD Env-Growth	SSP5	NOR	GDP|PPP	billion US$2005/yr	228.255	259.988	298.736	339.874	394.457	459.611	525.964	594.797	673.205	765.125	871.751	995.59	1138.62	1300.25	1480.66	1677.4	1889.99	2120.14	2372.87
IIASA GDP	SSP1	NPL	GDP|PPP	billion US$2005/yr	34.5427	44.9196	55.7021	68.7849	86.7791	112.597	148.28	195.128	253.775	322.918	399.644	479.936	560.209	636.931	706.977	767.935	818.363	857.585	884.674
IIASA GDP	SSP2	NPL	GDP|PPP	billion US$2005/yr	34.5427	44.6564	56.1875	67.4894	79.938	95.2959	115.985	143.067	177.381	219.039	267.599	322.263	382.406	447.065	514.535	583.098	651.292	718.238	783.444
IIASA GDP	SSP3	NPL	GDP|PPP	billion US$2005/yr	34.5427	43.9909	52.9187	62.2199	71.9472	81.7688	91.1319	100.115	108.255	116.304	124.832	134.18	144.355	155.559	167.345	179.375	191.725	204.737	218.683
IIASA GDP	SSP4	NPL	GDP|PPP	billion US$2005/yr	34.5427	43.8054	52.9526	63.265	75.2882	88.8896	103.782	120.174	137.547	156.836	179.022	204.802	234.44	268.58	306.867	349.014	395.434	447.117	505.019
IIASA GDP	SSP5	NPL	GDP|PPP	billion US$2005/yr	34.5427	44.9529	56.3391	71.2941	93.3804	126.832	175.488	242.65	330.808	439.758	566.504	705.432	850.334	994.336	1130.99	1255.04	1369.19	1487.24	1616.38
OECD Env-Growth	SSP1	NPL	GDP|PPP	billion US$2005/yr	32.337	39.154	49.768	67.559	95.617	137.762	197.306	277.52	380.174	505.182	650.733	813.357	989.531	1176.11	1366.88	1555.81	1737.38	1908.63	2062.89
OECD Env-Growth	SSP2	NPL	GDP|PPP	billion US$2005/yr	32.337	39.533	50.058	65.31	85.289	110.208	142.72	184.59	237.576	303.124	382.88	478.399	591.586	724.177	874.609	1041.95	1225.87	1426.56	1642.16
OECD Env-Growth	SSP3	NPL	GDP|PPP	billion US$2005/yr	32.337	39.922	50.632	63.722	78.554	94.113	112.103	132.888	156.731	183.837	214.749	250.175	291.121	338.479	391.518	450.649	517.072	591.83	675.734
OECD Env-Growth	SSP4	NPL	GDP|PPP	billion US$2005/yr	32.337	39.914	50.526	62.961	76.379	88.671	101.623	115.303	129.646	144.626	160.45	177.407	195.951	216.399	238.088	261.22	286.473	314.436	345.598
OECD Env-Growth	SSP5	NPL	GDP|PPP	billion US$2005/yr	32.337	39.129	49.844	69.612	104.739	162.535	247.429	364.994	518.696	709.348	935.381	1193.27	1479.34	1790.64	2120.13	2460.03	2802.85	3144.78	3475.31
IIASA GDP	SSP1	NZL	GDP|PPP	billion US$2005/yr	117.451	138.888	157.361	180.133	204.572	230.076	256.306	283.18	310.431	338.31	367.286	397.344	428.133	459.354	490.83	522.105	552.184	580.355	607.04
IIASA GDP	SSP2	NZL	GDP|PPP	billion US$2005/yr	117.451	139.398	158.263	180.589	203.357	226.169	249.071	272.206	295.361	318.71	342.549	366.837	391.469	416.386	441.382	466.245	490.655	514.383	537.288
IIASA GDP	SSP3	NZL	GDP|PPP	billion US$2005/yr	117.451	137.737	152.425	167.721	181.318	193.498	204.762	215.343	224.973	233.748	241.929	249.67	257.087	263.946	269.87	274.565	278.055	280.513	282.131
IIASA GDP	SSP4	NZL	GDP|PPP	billion US$2005/yr	117.451	139.628	158.402	179.77	200.106	219.204	237.481	255.355	272.621	289.432	305.991	322.219	338.115	353.49	368.024	381.372	393.243	403.44	411.92
IIASA GDP	SSP5	NZL	GDP|PPP	billion US$2005/yr	117.451	139.527	160.478	188.818	222.822	262.155	306.614	356.388	411.488	472.583	541.014	617.542	702.008	794.292	894.525	1002.59	1117.66	1239.28	1368.37
OECD Env-Growth	SSP1	NZL	GDP|PPP	billion US$2005/yr	110.886	125.415	140.859	157.411	176.908	201.299	229.842	262.206	296.395	331.281	367.934	406.936	447.438	487.567	527.675	566.91	605.038	642.392	678.899
OECD Env-Growth	SSP2	NZL	GDP|PPP	billion US$2005/yr	110.886	125.333	140.481	155.408	170.481	187.55	207.978	232.345	259.567	288.806	321.085	357.064	396.252	437.217	479.928	523.897	569.148	616.212	664.606
OECD Env-Growth	SSP3	NZL	GDP|PPP	billion US$2005/yr	110.886	124.418	137.608	149.155	158.622	167.545	177.109	187.69	198.294	208.266	218.635	229.857	241.005	250.676	259.314	266.664	273.008	278.688	283.051
OECD Env-Growth	SSP4	NZL	GDP|PPP	billion US$2005/yr	110.886	124.973	139.503	155.043	173.223	195.797	221.936	251.466	282.631	314.122	346.959	381.305	416.133	449.625	482.545	514.379	545.316	575.879	604.892
OECD Env-Growth	SSP5	NZL	GDP|PPP	billion US$2005/yr	110.886	126.212	143.283	163.898	191.84	229.079	274.36	328.271	389.557	457.984	535.901	625.218	726.94	840.406	965.569	1101.9	1249.63	1410.12	1585.92
IIASA GDP	SSP1	OMN	GDP|PPP	billion US$2005/yr	59.7738	68.1502	78.0349	86.8878	94.5391	100.959	106.812	115.015	125.599	137.957	151.205	164.831	178.364	191.276	203.273	214.103	223.319	230.752	236.535
IIASA GDP	SSP2	OMN	GDP|PPP	billion US$2005/yr	59.7738	68.7145	79.6299	89.4616	98.701	107.371	116.221	126.019	136.266	149.827	166.321	184.671	203.393	222.227	241.156	260.127	279.051	297.798	316.1
IIASA GDP	SSP3	OMN	GDP|PPP	billion US$2005/yr	59.7738	68.1072	77.3194	83.6254	88.3064	91.9228	95.614	100.186	105.506	111.608	119.151	128.13	137.749	147.399	157.461	168.122	179.623	191.995	205.371
IIASA GDP	SSP4	OMN	GDP|PPP	billion US$2005/yr	59.7738	67.9111	75.951	79.9987	81.7985	82.5556	83.5067	85.1792	87.3013	89.5509	92.0708	94.5909	96.5712	97.6875	98.3378	98.624	98.6648	98.5534	98.2963
IIASA GDP	SSP5	OMN	GDP|PPP	billion US$2005/yr	59.7738	68.3923	79.0852	89.6456	100.083	110.21	120.414	133.612	150.589	171.696	196.106	222.898	251.083	279.772	308.378	336.321	362.654	386.605	407.825
OECD Env-Growth	SSP1	OMN	GDP|PPP	billion US$2005/yr	68.334	83.357	100.514	123.592	153.17	187.448	219.843	245.785	268.472	293.81	319.03	342.711	362.44	377.862	390.516	400.493	408.529	414.661	418.263
OECD Env-Growth	SSP2	OMN	GDP|PPP	billion US$2005/yr	68.334	84.751	102.907	122.924	145.06	169.084	194.025	217.631	240.522	268.961	301.213	336.055	371.412	406.398	441.099	475.33	509.265	542.728	575.473
OECD Env-Growth	SSP3	OMN	GDP|PPP	billion US$2005/yr	68.334	83.748	100.719	117.807	134.422	150.246	163.081	170.563	173.915	182.254	193.499	207.219	222.067	237.807	254.571	271.988	290.53	310.44	331.82
OECD Env-Growth	SSP4	OMN	GDP|PPP	billion US$2005/yr	68.334	83.334	100.055	120.597	145.633	173.328	198.127	216.587	229.447	245.942	263.563	281.423	297.709	312.035	325.255	337.14	348.427	359.315	369.371
OECD Env-Growth	SSP5	OMN	GDP|PPP	billion US$2005/yr	68.334	83.594	101.08	124.653	156.689	195.289	234.769	272.164	307.293	347.106	388.817	431.583	473.02	512.133	549.634	585.901	621.189	655.169	686.649
IIASA GDP	SSP1	PAK	GDP|PPP	billion US$2005/yr	426.987	503.201	614.781	761.46	962.85	1230.67	1574.34	1998.96	2499.8	3058.1	3646.81	4237.63	4809	5339.87	5816.56	6232.79	6589.82	6889.74	7159.61
IIASA GDP	SSP2	PAK	GDP|PPP	billion US$2005/yr	426.987	493.751	578.159	675.926	805.244	974.465	1191.1	1463.2	1796.02	2191.05	2647.84	3166.35	3745.17	4378.66	5055.31	5762.06	6482.75	7202.1	7905.12
IIASA GDP	SSP3	PAK	GDP|PPP	billion US$2005/yr	426.987	488.083	554.798	618.229	693.166	781.936	884.765	1002.47	1133.08	1272.52	1416.15	1562.69	1713.85	1873.56	2044.54	2227.55	2421.8	2627.31	2844.97
IIASA GDP	SSP4	PAK	GDP|PPP	billion US$2005/yr	426.987	485.592	551.485	618.846	705.935	816.386	951.492	1112.82	1299.41	1508.09	1735.13	1981.07	2249.78	2547.94	2881.1	3252.7	3663.64	4115.16	4609.05
IIASA GDP	SSP5	PAK	GDP|PPP	billion US$2005/yr	426.987	503.375	619.711	781.425	1015.97	1343.72	1783.73	2349.66	3042.01	3841.79	4715.69	5624.36	6532.82	7405.16	8245.57	9142.01	10167.5	11349	12665.1
OECD Env-Growth	SSP1	PAK	GDP|PPP	billion US$2005/yr	418.508	487.451	593.459	763.789	1017.29	1377.05	1851.66	2441.83	3134.43	3921.3	4789.47	5723.2	6704.03	7683.78	8646.42	9573.42	10456.3	11293.4	12060.3
OECD Env-Growth	SSP2	PAK	GDP|PPP	billion US$2005/yr	418.508	492.16	603.664	761.816	967.874	1230.31	1565.23	1979.79	2479.51	3073.55	3773.76	4593.54	5542.45	6606.07	7770.17	9026.42	10374.2	11814.6	13333.7
OECD Env-Growth	SSP3	PAK	GDP|PPP	billion US$2005/yr	418.508	496.098	612.85	756.619	915.845	1090.21	1290.5	1514.67	1759.88	2029.38	2329.77	2669.78	3056.65	3484.72	3947.36	4442.54	4976.32	5555.9	6186.09
OECD Env-Growth	SSP4	PAK	GDP|PPP	billion US$2005/yr	418.508	495.368	609.89	745.903	891.682	1038.66	1199.97	1372.88	1553.99	1745.39	1951.11	2176.49	2426.57	2695.78	2978.75	3275.77	3592.03	3934.15	4307.47
OECD Env-Growth	SSP5	PAK	GDP|PPP	billion US$2005/yr	418.508	486.705	591.922	775.634	1075.08	1529.32	2146.86	2936.72	3889.69	5002.76	6267.16	7672.22	9200.89	10797	12449.1	14135.2	15847.2	17587.5	19320.5
IIASA GDP	SSP1	PAN	GDP|PPP	billion US$2005/yr	34.2284	48.5863	61.4874	71.3467	79.7244	88.5564	98.7596	110.217	121.918	132.905	142.337	150.293	157.785	165.443	173.303	180.786	187.24	192.161	195.182
IIASA GDP	SSP2	PAN	GDP|PPP	billion US$2005/yr	34.2284	48.5369	60.9705	70.1306	78.0731	85.5429	94.6461	105.635	117.977	130.481	142.329	153.04	162.471	171.054	179.656	188.665	198.041	207.505	216.776
IIASA GDP	SSP3	PAN	GDP|PPP	billion US$2005/yr	34.2284	48.4842	60.2572	68.0163	74.118	79.7414	85.9296	93.1816	101.693	110.754	119.848	128.584	136.995	145.207	153.436	161.679	169.997	178.461	187.325
IIASA GDP	SSP4	PAN	GDP|PPP	billion US$2005/yr	34.2284	48.0984	58.9203	65.0591	68.8767	71.7406	74.8083	78.4934	82.9075	87.2201	90.8683	93.4055	94.8494	95.3644	95.373	94.9409	94.0581	92.7502	91.0359
IIASA GDP	SSP5	PAN	GDP|PPP	billion US$2005/yr	34.2284	48.6641	62.1198	73.3572	84.016	95.9374	110.011	126.061	142.874	159.673	177.24	196.259	217.022	239.031	261.621	283.726	304.218	322.167	336.805
OECD Env-Growth	SSP1	PAN	GDP|PPP	billion US$2005/yr	44.448	64.525	85.061	109.253	136.631	166.417	197.139	227.99	257.626	285.333	310.64	332.559	350.672	365.248	377.696	387.036	393.121	396.068	395.434
OECD Env-Growth	SSP2	PAN	GDP|PPP	billion US$2005/yr	44.448	64.91	85.949	109.171	133.197	157.894	183.68	210.613	238.213	266.165	294.31	322.008	348.953	375.062	400.585	425.15	448.453	470.293	490.805
OECD Env-Growth	SSP3	PAN	GDP|PPP	billion US$2005/yr	44.448	65.12	86.439	107.984	128.046	146.562	164.674	182.739	200.617	218.271	235.871	253.41	271.2	289.395	307.853	326.179	344.484	362.927	381.849
OECD Env-Growth	SSP4	PAN	GDP|PPP	billion US$2005/yr	44.448	64.64	85.071	106.756	129.042	151.141	173.003	194.419	214.857	234.115	252.139	268.102	281.739	293.187	303.211	311.3	317.621	322.42	325.596
OECD Env-Growth	SSP5	PAN	GDP|PPP	billion US$2005/yr	44.448	64.557	85.495	112.109	144.938	183.177	224.239	267.278	310.82	354.061	396.478	436.752	473.999	508.118	540.696	570.211	596.199	618.498	635.955
IIASA GDP	SSP1	PER	GDP|PPP	billion US$2005/yr	208.513	278.814	349.834	413.668	473.702	530.945	586.81	640.854	691.225	734.932	769.448	794.807	812.987	825.772	839.584	857.858	881.045	905.305	926.926
IIASA GDP	SSP2	PER	GDP|PPP	billion US$2005/yr	208.513	279.254	347.059	401.441	451.108	500.504	552.4	605.68	658.172	707.204	750.763	789.157	823.324	854.186	882.034	906.766	928.797	953.128	983.176
IIASA GDP	SSP3	PER	GDP|PPP	billion US$2005/yr	208.513	279.802	345.586	395.883	436.761	474.951	513.902	555.022	596.315	635.856	672.511	707.999	744.446	782.859	822.533	862.724	903.76	946.41	992.144
IIASA GDP	SSP4	PER	GDP|PPP	billion US$2005/yr	208.513	276.52	333.809	369.056	389.326	403.58	417.66	434.66	451.988	467.037	478.094	486.185	492.589	497.802	501.675	503.905	504.459	503.339	500.727
IIASA GDP	SSP5	PER	GDP|PPP	billion US$2005/yr	208.513	278.314	349.073	414.21	478.303	542.29	606.692	669.698	728.16	778.259	816.988	853.702	897.163	951.318	1014.67	1084.32	1157.75	1230.71	1299.56
OECD Env-Growth	SSP1	PER	GDP|PPP	billion US$2005/yr	248.847	329.29	428.611	549.194	692.033	854.21	1025.12	1196.23	1361.75	1518.61	1661.65	1791.31	1905.82	2003.24	2088.34	2161.01	2221.5	2266.69	2294.57
OECD Env-Growth	SSP2	PER	GDP|PPP	billion US$2005/yr	248.847	331.247	432.163	541.933	653.711	766.083	883.488	1004.65	1129.38	1256.21	1381.99	1509.04	1637.56	1766.28	1895.68	2026.38	2158.5	2291.9	2426.8
OECD Env-Growth	SSP3	PER	GDP|PPP	billion US$2005/yr	248.847	334.393	441.714	549.923	648.638	734.772	819.033	902.024	984.796	1067.92	1150.9	1236.59	1326.46	1420.94	1519.23	1620.56	1725.81	1835.41	1950.77
OECD Env-Growth	SSP4	PER	GDP|PPP	billion US$2005/yr	248.847	330.165	428.672	532.004	639.229	745.626	853.139	959.057	1063.38	1165.53	1262.64	1354.67	1441.03	1520.74	1595.45	1664.62	1729.17	1789.7	1845.28
OECD Env-Growth	SSP5	PER	GDP|PPP	billion US$2005/yr	248.847	327.823	425.112	552.118	716.672	911.145	1114.09	1315.89	1510.8	1696.93	1869.27	2031.21	2180.54	2316.05	2446.12	2571.43	2693.65	2809.78	2916.94
IIASA GDP	SSP1	PHL	GDP|PPP	billion US$2005/yr	278.188	333.972	429.834	547.277	701.858	892.508	1114.63	1351.47	1590.1	1819.35	2034.83	2236.28	2427.38	2608.84	2778.29	2931.25	3063.89	3173.79	3259.67
IIASA GDP	SSP2	PHL	GDP|PPP	billion US$2005/yr	278.188	334.331	421.169	520.11	639.285	784.99	958.124	1153.39	1363.19	1581.88	1806.18	2032.63	2259.43	2483.42	2700.87	2909.09	3106.59	3293.63	3469.84
IIASA GDP	SSP3	PHL	GDP|PPP	billion US$2005/yr	278.188	331.404	401.226	468.899	544.369	630.418	724.518	821.261	910.977	994.675	1078.17	1167.07	1261.5	1361.2	1464.39	1570.03	1678.37	1789.83	1905.38
IIASA GDP	SSP4	PHL	GDP|PPP	billion US$2005/yr	278.188	330.087	399.201	468.053	548.452	645.145	758.95	886.877	1019.69	1158.7	1311.16	1484	1676.56	1887.05	2112.12	2350.31	2602.46	2869.35	3152.46
IIASA GDP	SSP5	PHL	GDP|PPP	billion US$2005/yr	278.188	334.11	433.995	564.368	746.89	984.766	1275.43	1599.72	1940.35	2282.26	2619.32	2950.3	3277.91	3600.67	3913.04	4233.71	4609.23	5068.31	5612.59
OECD Env-Growth	SSP1	PHL	GDP|PPP	billion US$2005/yr	332.055	413.788	521.994	668.807	871.821	1139.86	1477.34	1879.9	2340.08	2850.49	3399.4	3969.55	4540.92	5104.79	5656.98	6184.63	6677.66	7131.26	7535.02
OECD Env-Growth	SSP2	PHL	GDP|PPP	billion US$2005/yr	332.055	416.722	528.14	661.231	818.91	1000.37	1222.57	1489.05	1802.91	2166.58	2581.16	3044.87	3555.2	4113.89	4716.78	5357.66	6029.68	6729.75	7450.78
OECD Env-Growth	SSP3	PHL	GDP|PPP	billion US$2005/yr	332.055	419.859	535.44	657.632	783.475	906.961	1047.77	1207.88	1388.72	1592.52	1821.74	2079.18	2367.28	2690.25	3044.54	3426.88	3838.23	4280	4754.88
OECD Env-Growth	SSP4	PHL	GDP|PPP	billion US$2005/yr	332.055	419.387	533.031	645.294	755.582	850.572	953.109	1064.86	1186.83	1319.7	1463.7	1619.15	1787.46	1970.76	2165.76	2371.1	2587.62	2817.37	3063.76
OECD Env-Growth	SSP5	PHL	GDP|PPP	billion US$2005/yr	332.055	413.255	522.908	687.896	940.124	1296.08	1753.32	2311.03	2963.72	3707.16	4531.9	5421.16	6350.68	7312.09	8305.03	9314.16	10326.6	11335.6	12323.7
IIASA GDP	SSP1	PNG	GDP|PPP	billion US$2005/yr	16.3584	28.3853	43.7477	63.6928	84.9662	106.118	126.288	146.242	166.216	186.793	209.441	233.63	257.956	280.446	300.049	317.149	333.928	351.634	370.354
IIASA GDP	SSP2	PNG	GDP|PPP	billion US$2005/yr	16.3584	28.4494	43.5608	61.94	80.3092	97.7884	114.453	131.459	149.373	168.458	188.113	207.927	227.86	247.89	268.702	295.148	325.972	358.139	387.945
IIASA GDP	SSP3	PNG	GDP|PPP	billion US$2005/yr	16.3584	28.4719	43.4131	60.8406	76.9727	90.775	102.529	113.434	124.161	134.852	145.379	155.61	165.567	175.326	185.323	195.724	206.556	217.819	229.707
IIASA GDP	SSP4	PNG	GDP|PPP	billion US$2005/yr	16.3584	28.4159	43.1821	60.3044	76.2484	90.2309	102.729	115.042	127.961	141.741	156.292	171.335	186.676	202.198	218.286	235.113	252.743	271.207	290.746
IIASA GDP	SSP5	PNG	GDP|PPP	billion US$2005/yr	16.3584	28.4208	44.1651	65.4472	89.618	115.473	142.057	170.019	199.411	230.754	265.823	303.923	343.056	384.397	430.005	480.949	536.317	594.448	653.603
OECD Env-Growth	SSP1	PNG	GDP|PPP	billion US$2005/yr	15.207	23.548	29.564	38.805	53.103	73.526	100.583	134.938	176.856	225.945	281.043	340.173	401.387	462.587	523.704	582.51	637.618	687.822	731.938
OECD Env-Growth	SSP2	PNG	GDP|PPP	billion US$2005/yr	15.207	23.756	29.847	38.476	50.036	64.317	82.274	104.701	132.213	165.227	203.788	247.693	297.06	351.671	411.739	476.574	545.164	616.592	690.579
OECD Env-Growth	SSP3	PNG	GDP|PPP	billion US$2005/yr	15.207	23.804	30.037	37.949	47.372	57.552	69.315	82.967	98.56	116.019	135.212	156.038	178.525	202.755	228.762	256.146	284.777	314.77	346.385
OECD Env-Growth	SSP4	PNG	GDP|PPP	billion US$2005/yr	15.207	23.818	30.012	37.445	46.093	54.677	64.152	74.753	86.469	99.153	112.631	126.744	141.513	156.998	173.211	189.889	207.001	224.74	243.43
OECD Env-Growth	SSP5	PNG	GDP|PPP	billion US$2005/yr	15.207	23.548	29.67	40.016	57.64	84.709	121.824	170.347	231.206	304.547	389.499	483.969	585.7	692.069	803.326	916.34	1028.98	1139.15	1244.54
IIASA GDP	SSP1	POL	GDP|PPP	billion US$2005/yr	629.705	787.857	961.903	1110.55	1219.2	1296.68	1360.55	1422.4	1483.4	1545.16	1610.89	1681.46	1754.52	1825.85	1889.12	1940.16	1982.06	2024.65	2074.99
IIASA GDP	SSP2	POL	GDP|PPP	billion US$2005/yr	629.705	789.937	962.623	1102.3	1195.32	1253.83	1296.84	1336.28	1373.71	1409.72	1445.94	1482.28	1516.65	1547.24	1573.54	1597.23	1622.05	1652.15	1688.94
IIASA GDP	SSP3	POL	GDP|PPP	billion US$2005/yr	629.705	789.358	954.385	1074.86	1137.56	1159.14	1160.97	1155.63	1145.21	1130.78	1113.28	1092.73	1068.85	1041.72	1012.55	983.22	955.742	930.829	907.735
IIASA GDP	SSP4	POL	GDP|PPP	billion US$2005/yr	629.705	790.96	961.96	1094.68	1174.88	1217.82	1244.05	1265.52	1283.26	1297.57	1309.46	1318.78	1324.73	1325.72	1320.7	1310.32	1297.73	1286.72	1279.27
IIASA GDP	SSP5	POL	GDP|PPP	billion US$2005/yr	629.705	789.99	974.884	1148.98	1299.22	1434.09	1569.71	1717.8	1879.38	2056.99	2256.37	2480.35	2726.21	2989.33	3262.06	3539.25	3825.58	4136.92	4486
OECD Env-Growth	SSP1	POL	GDP|PPP	billion US$2005/yr	660.478	768.404	904.195	1041.87	1183.14	1326.29	1452.73	1551.89	1626.93	1692.17	1758.76	1831.98	1904.63	1966.46	2017.09	2059.19	2097.9	2139.7	2186.42
OECD Env-Growth	SSP2	POL	GDP|PPP	billion US$2005/yr	660.478	767.34	897.648	1017.74	1129.03	1236.73	1335.1	1417.39	1486.29	1551.65	1620.69	1696.78	1773.74	1842.46	1903.86	1961.98	2021.2	2086.88	2160.71
OECD Env-Growth	SSP3	POL	GDP|PPP	billion US$2005/yr	660.478	764.17	883.903	982.027	1059.05	1119.92	1162.43	1182.02	1183.21	1176.86	1169.89	1163.66	1151.65	1128.36	1098.4	1065.62	1033.73	1004.49	976.07
OECD Env-Growth	SSP4	POL	GDP|PPP	billion US$2005/yr	660.478	765.979	896.548	1028.83	1162.14	1293.07	1404.69	1489.62	1551.96	1604.71	1656.99	1710.52	1757.16	1787.83	1807.12	1820.36	1833.41	1851.05	1872.14
OECD Env-Growth	SSP5	POL	GDP|PPP	billion US$2005/yr	660.478	770.619	915.879	1081.94	1268.26	1467.3	1656.97	1830.77	1994.01	2163.29	2352.9	2572.71	2818.43	3078.39	3347.18	3626.71	3924.29	4254.14	4628.21
IIASA GDP	SSP1	PRI	GDP|PPP	billion US$2005/yr	93.7085	89.7616	91.1738	93.9344	97.2433	100.042	101.865	103.116	104.13	105.015	105.69	106.155	106.344	106.142	105.553	104.613	103.356	101.616	99.1793
IIASA GDP	SSP2	PRI	GDP|PPP	billion US$2005/yr	93.7085	91.5573	93.5885	95.6184	98.0781	100.413	102.152	103.484	104.593	105.575	106.342	107.072	107.922	108.983	110.264	111.799	113.645	115.821	118.159
IIASA GDP	SSP3	PRI	GDP|PPP	billion US$2005/yr	93.7085	90.7272	93.3218	97.49	102.664	108.064	113.046	117.619	122.136	126.856	131.903	137.472	143.731	150.866	158.956	168.028	178.104	189.29	201.731
IIASA GDP	SSP4	PRI	GDP|PPP	billion US$2005/yr	93.7085	90.9274	91.0578	90.059	88.8828	87.6318	86.0747	84.018	81.3335	78.2216	74.9488	71.9765	69.5147	67.5306	65.8833	64.4448	63.168	61.9841	60.7206
IIASA GDP	SSP5	PRI	GDP|PPP	billion US$2005/yr	93.7085	89.5123	90.4463	92.3933	94.7943	96.6986	98.188	99.4478	100.544	101.279	101.475	101.203	100.448	99.1397	97.3626	95.2906	93.1656	91.0182	88.7076
OECD Env-Growth	SSP1	PRI	GDP|PPP	billion US$2005/yr	64.752	72.416	79.597	87.571	95.766	103.832	110.589	115.573	118.932	120.777	120.927	120.242	118.768	116.483	114.01	111.453	108.827	106.021	102.961
OECD Env-Growth	SSP2	PRI	GDP|PPP	billion US$2005/yr	64.752	72.005	78.873	85.797	92.248	98.385	103.979	108.709	112.692	115.829	117.874	119.587	121.182	122.66	124.277	126.084	128.162	130.64	133.417
OECD Env-Growth	SSP3	PRI	GDP|PPP	billion US$2005/yr	64.752	70.886	77.21	83.676	89.409	94.853	100.155	105.097	109.865	114.261	118.08	121.999	126.356	130.988	135.724	140.589	145.763	151.412	157.708
OECD Env-Growth	SSP4	PRI	GDP|PPP	billion US$2005/yr	64.752	70.647	76.398	82.537	89.074	95.542	101.047	105.308	108.627	110.954	112.092	112.63	112.725	112.355	111.863	111.324	110.903	110.647	110.315
OECD Env-Growth	SSP5	PRI	GDP|PPP	billion US$2005/yr	64.752	72.328	79.465	87.684	96.604	105.357	112.205	116.831	119.573	120.692	120.026	118.651	116.432	113.419	110.417	107.695	105.351	103.331	101.529
IIASA GDP	SSP1	PRT	GDP|PPP	billion US$2005/yr	213.133	231.496	263.478	320.397	394.437	480.174	568.301	653.475	732.555	805.029	871.927	933.295	988.642	1037.19	1079.1	1116.4	1150.53	1182.7	1212.65
IIASA GDP	SSP2	PRT	GDP|PPP	billion US$2005/yr	213.133	231.583	262.326	315.965	384.963	464.192	544.578	620.773	690.155	752.592	809.552	861.45	908.555	951.391	991.142	1029.28	1066.82	1103.98	1139.38
IIASA GDP	SSP3	PRT	GDP|PPP	billion US$2005/yr	213.133	216.083	218.989	234.394	260.617	293.127	323.944	348.732	366.547	378.787	387.138	392.575	395.854	397.455	398.07	398.445	398.877	399.061	398.563
IIASA GDP	SSP4	PRT	GDP|PPP	billion US$2005/yr	213.133	231.342	260.569	310.692	373.719	444.547	514.212	577.193	630.757	675.595	713.726	746.028	773.149	795.213	812.871	827.506	840.65	852.628	861.983
IIASA GDP	SSP5	PRT	GDP|PPP	billion US$2005/yr	213.133	232.434	267.921	333.302	423.12	534.025	657.333	787.964	922.244	1059.19	1200.1	1344.86	1492.08	1640.38	1789.59	1941.98	2099.36	2263.85	2435.99
OECD Env-Growth	SSP1	PRT	GDP|PPP	billion US$2005/yr	230.606	230.091	253.869	281.428	314.359	350.773	387.153	423.634	460.909	500.697	542.749	585.152	625.91	664.811	702.433	738.836	773.513	805.629	834.34
OECD Env-Growth	SSP2	PRT	GDP|PPP	billion US$2005/yr	230.606	229.811	252.432	275.982	301.271	327.69	355.143	384.765	417.937	455.499	496.823	539.96	583.496	627.89	673.28	719.664	766.803	813.894	859.501
OECD Env-Growth	SSP3	PRT	GDP|PPP	billion US$2005/yr	230.606	228.259	247.043	263.175	276.71	286.843	294.2	299.939	305.628	311.969	318.422	323.698	326.637	328.068	329.005	329.307	329.045	327.843	324.936
OECD Env-Growth	SSP4	PRT	GDP|PPP	billion US$2005/yr	230.606	229.297	251.771	277.196	306.56	337.512	366.729	394.966	424.033	454.97	487.413	519.118	548.272	575.397	601.785	627.301	652.259	676.009	696.407
OECD Env-Growth	SSP5	PRT	GDP|PPP	billion US$2005/yr	230.606	231.203	257.926	294.003	341.673	398.458	459.367	526.098	600.816	686.923	785.692	895.646	1015.48	1145.81	1287.2	1439.97	1603.32	1776.18	1959.16
IIASA GDP	SSP1	PRY	GDP|PPP	billion US$2005/yr	23.2879	27.5805	33.1681	41.2103	51.8475	64.7669	79.7169	95.6997	114.1	134.258	154.809	173.727	190.422	204.886	217.396	228.05	236.713	244.46	252.5
IIASA GDP	SSP2	PRY	GDP|PPP	billion US$2005/yr	23.2879	27.3628	31.7975	37.7772	45.5672	55.1765	66.5552	79.2957	92.851	107.034	121.901	137.544	156.755	178.966	202.518	225.025	245.603	264.02	280.464
IIASA GDP	SSP3	PRY	GDP|PPP	billion US$2005/yr	23.2879	27.1607	30.7378	35.0414	40.2767	46.37	53.0873	60.0314	66.7353	73.1929	79.7046	86.5654	93.8841	101.686	109.933	118.561	127.641	137.26	147.547
IIASA GDP	SSP4	PRY	GDP|PPP	billion US$2005/yr	23.2879	27.0194	30.4883	34.7707	40.1894	46.7414	54.3493	62.7076	71.3901	80.4092	90.1325	100.88	112.74	125.702	139.716	154.722	170.839	188.19	206.947
IIASA GDP	SSP5	PRY	GDP|PPP	billion US$2005/yr	23.2879	27.5929	33.4082	42.1543	54.3021	69.7958	88.5509	109.505	134.297	162.184	191.473	219.483	245.239	268.894	294.192	323.793	358.539	397.406	438.302
OECD Env-Growth	SSP1	PRY	GDP|PPP	billion US$2005/yr	30.001	36.849	46.173	60.969	82.27	110.602	145.259	185.206	228.926	275.504	323.621	371.941	419.025	463.584	506.044	545.338	581.062	613.145	639.942
OECD Env-Growth	SSP2	PRY	GDP|PPP	billion US$2005/yr	30.001	37.146	46.722	60.084	77.042	97.428	121.946	150.506	183.047	219.732	260.446	305.056	353.293	404.646	458.697	514.787	572.731	632.364	693.196
OECD Env-Growth	SSP3	PRY	GDP|PPP	billion US$2005/yr	30.001	37.391	47.285	59.593	73.497	88.396	104.907	122.868	142.115	162.711	184.682	208.16	233.31	260.144	288.434	317.99	349.123	382.071	417.172
OECD Env-Growth	SSP4	PRY	GDP|PPP	billion US$2005/yr	30.001	37.353	47.345	60.409	77.089	97.199	121.165	149.01	180.845	217.066	257.985	303.981	355.621	413.288	476.954	546.632	623.136	707.273	800.11
OECD Env-Growth	SSP5	PRY	GDP|PPP	billion US$2005/yr	30.001	36.806	46.284	62.749	88.543	124.89	170.337	223.9	284.041	349.971	420.38	493.987	569.115	644.181	720.035	795.171	868.984	941.306	1009.36
OECD Env-Growth	SSP1	PSE	GDP|PPP	billion US$2005/yr	11.09	15	20.72	29.479	42.082	58.855	79.007	101.54	125.396	149.767	173.737	197.589	220.385	242.012	263.144	283.754	304.075	324.2	343.628
OECD Env-Growth	SSP2	PSE	GDP|PPP	billion US$2005/yr	11.097	14.788	20.223	27.845	37.652	49.548	63.636	79.642	97.455	117.007	138.068	161.296	186.496	213.678	243.036	274.906	309.56	347.265	388.207
OECD Env-Growth	SSP3	PSE	GDP|PPP	billion US$2005/yr	11.054	13.976	18.654	25.159	33.173	42.545	53.705	66.822	82.094	99.449	118.781	140.682	165.483	193.504	224.821	259.381	297.342	339.12	385.331
OECD Env-Growth	SSP4	PSE	GDP|PPP	billion US$2005/yr	11.097	14.03	18.402	23.892	30.208	36.683	43.695	51.167	59.081	67.381	76.075	85.72	96.439	108.361	121.478	135.891	151.867	169.82	190.155
OECD Env-Growth	SSP5	PSE	GDP|PPP	billion US$2005/yr	11.142	15.153	21.294	31.439	47.124	68.841	94.811	123.156	152.254	181.055	208.678	235.395	259.883	282.39	304.412	326.502	350.141	376.444	406.039
OECD Env-Growth	SSP1	PYF	GDP|PPP	billion US$2005/yr	4.493	4.987	5.39	5.863	6.449	7.199	8.068	9.004	9.941	10.849	11.753	12.634	13.504	14.313	15.048	15.728	16.363	16.946	17.459
OECD Env-Growth	SSP2	PYF	GDP|PPP	billion US$2005/yr	4.493	4.945	5.313	5.689	6.089	6.586	7.217	7.954	8.76	9.621	10.572	11.613	12.769	13.997	15.267	16.592	17.991	19.483	21.07
OECD Env-Growth	SSP3	PYF	GDP|PPP	billion US$2005/yr	4.493	4.899	5.188	5.448	5.684	5.971	6.358	6.827	7.349	7.919	8.575	9.331	10.216	11.2	12.253	13.391	14.638	16.017	17.541
OECD Env-Growth	SSP4	PYF	GDP|PPP	billion US$2005/yr	4.493	4.886	5.18	5.535	6.013	6.638	7.384	8.214	9.084	9.971	10.903	11.854	12.837	13.799	14.718	15.603	16.477	17.353	18.215
OECD Env-Growth	SSP5	PYF	GDP|PPP	billion US$2005/yr	4.493	5.005	5.472	6.115	6.998	8.153	9.491	10.963	12.499	14.065	15.698	17.376	19.116	20.85	22.56	24.271	25.991	27.713	29.398
OECD Env-Growth	SSP1	QAT	GDP|PPP	billion US$2005/yr	122.76	205.428	257.151	298.357	329.662	358.905	383.335	401.142	412.954	423.716	435.445	444.255	447.515	444.92	438.799	429.953	418.874	405.463	389.45
OECD Env-Growth	SSP2	QAT	GDP|PPP	billion US$2005/yr	122.76	206.046	266.067	316.472	355.354	382.915	405.205	426.505	448.093	473.762	504.07	533.96	560.319	581.326	596.673	606.371	611.231	611.297	606.721
OECD Env-Growth	SSP3	QAT	GDP|PPP	billion US$2005/yr	122.76	199.745	255.913	301.869	335.91	359.344	377.102	389.127	398.197	410.559	422.376	435.856	449.154	461.413	472.424	482.286	491.128	498.298	503.454
OECD Env-Growth	SSP4	QAT	GDP|PPP	billion US$2005/yr	122.76	205.498	268.379	330.93	392.37	448.509	491.31	522.142	543.489	562.742	582.333	597.315	605.015	604.872	598.239	585.941	569.462	549.263	525.686
OECD Env-Growth	SSP5	QAT	GDP|PPP	billion US$2005/yr	122.76	212.218	285.173	372.631	472.744	572.842	662.672	738.124	801.16	860.595	920.377	975.09	1019.78	1053.58	1080.94	1103.18	1119.92	1130.5	1134.18
IIASA GDP	SSP1	ROU	GDP|PPP	billion US$2005/yr	214.432	269.317	334.886	402.205	457.276	499.402	529.434	550.193	563.748	574.572	584.691	594.331	602.862	608.613	611.593	611.792	609.638	604.32	599.023
IIASA GDP	SSP2	ROU	GDP|PPP	billion US$2005/yr	214.432	270.091	334.794	398.338	448.014	485.858	514.183	536.2	552.685	565.862	577.195	587.424	596.73	605.356	614.138	624.011	636.07	650.399	667.046
IIASA GDP	SSP3	ROU	GDP|PPP	billion US$2005/yr	214.432	269.827	332.448	391.645	435.345	466.853	488.965	505.471	517.8	527.791	536.346	545.047	556.156	571.77	593.059	620.302	653.245	691.373	734.101
IIASA GDP	SSP4	ROU	GDP|PPP	billion US$2005/yr	214.432	268.687	327.378	378.525	410.541	428.683	436.677	437.89	432.896	424.196	413.31	401.73	390.002	377.906	366.283	355.904	347.467	340.569	334.88
IIASA GDP	SSP5	ROU	GDP|PPP	billion US$2005/yr	214.432	269.524	337.061	409.842	474.669	530.004	575.18	613.372	648.394	684.137	721.438	759.184	796.083	829.475	858.921	884.004	905.017	920.466	934.936
OECD Env-Growth	SSP1	ROU	GDP|PPP	billion US$2005/yr	234.124	255.365	300.584	356.653	424.498	498.346	570.902	635.989	693.068	739.904	786.012	824.51	853.448	870.507	880.142	883.849	881.511	874.371	861.346
OECD Env-Growth	SSP2	ROU	GDP|PPP	billion US$2005/yr	234.124	255.562	299.725	346.698	392.816	433.452	470.979	504.344	535.898	564.211	595.965	626.274	654.799	680.529	705.498	730.644	756.735	783.647	810.6
OECD Env-Growth	SSP3	ROU	GDP|PPP	billion US$2005/yr	234.124	256.357	300.818	341.759	374.222	393.929	407.964	416.883	424.193	429.437	438.468	448.562	460.208	473.206	487.634	503.357	521.368	541.869	564.71
OECD Env-Growth	SSP4	ROU	GDP|PPP	billion US$2005/yr	234.124	255.195	298.699	343.866	389.111	429.145	465.652	496.641	525.386	549.744	576.381	599.316	617.657	630.324	640.036	647.577	654.634	661.496	666.398
OECD Env-Growth	SSP5	ROU	GDP|PPP	billion US$2005/yr	234.124	255.166	301.073	365.801	453.09	555.072	657.795	754.343	844.018	924.393	1007.47	1084.59	1152.38	1207.22	1254.38	1295.6	1330.13	1359.34	1380.83
IIASA GDP	SSP1	RUS	GDP|PPP	billion US$2005/yr	2050.95	2574.69	2960	3277.98	3525.32	3731.85	3919.07	4088.55	4244.85	4412.53	4611.73	4838.49	5079.02	5315.78	5535.33	5733.72	5910.54	6066.57	6201.47
IIASA GDP	SSP2	RUS	GDP|PPP	billion US$2005/yr	2050.95	2589.47	2982.23	3286.66	3506.75	3694.02	3884.12	4082.48	4281.33	4493.6	4735.73	5009.19	5305.24	5611.02	5916.62	6219.97	6524.85	6834.57	7147.66
IIASA GDP	SSP3	RUS	GDP|PPP	billion US$2005/yr	2050.95	2591.36	2971.22	3234.69	3391.86	3509.54	3632.61	3772.75	3926.4	4094.71	4290.65	4525.15	4803.53	5125.8	5487.87	5886.31	6320.17	6789.89	7292.48
IIASA GDP	SSP4	RUS	GDP|PPP	billion US$2005/yr	2050.95	2579.61	2931.82	3155.54	3262.07	3319.44	3369.43	3417.76	3454.82	3483.49	3514.94	3551.61	3591.15	3629.93	3663.93	3692.29	3716.44	3735.81	3747.04
IIASA GDP	SSP5	RUS	GDP|PPP	billion US$2005/yr	2050.95	2580.3	2996.11	3387.21	3751.23	4105.7	4458.25	4827.61	5227.99	5684.44	6214.22	6806.53	7438.94	8081.68	8711.4	9317.99	9895.87	10439.6	10938.8
OECD Env-Growth	SSP1	RUS	GDP|PPP	billion US$2005/yr	2015.12	2444.53	2942.18	3536.19	4265.18	5041.56	5729.01	6253.43	6607.07	6887.94	7207.74	7512.45	7725.97	7820.39	7848.8	7857.36	7864.46	7863.52	7805.94
OECD Env-Growth	SSP2	RUS	GDP|PPP	billion US$2005/yr	2015.12	2449.87	2931.95	3447.36	3986.78	4502.3	4968.22	5347.5	5655.62	5974.9	6391.65	6832.15	7263.32	7648.2	7993.81	8326.55	8663.87	9003.11	9315.89
OECD Env-Growth	SSP3	RUS	GDP|PPP	billion US$2005/yr	2015.12	2449.06	2914.39	3357.99	3777.64	4152.52	4459.88	4641.81	4720.25	4795.7	4958.01	5185.71	5439.27	5697.39	5960.02	6196.67	6452.2	6711.39	6951.18
OECD Env-Growth	SSP4	RUS	GDP|PPP	billion US$2005/yr	2015.12	2442.99	2911.39	3422.88	3995.42	4591.92	5138.98	5559.22	5857.67	6133.35	6484.14	6819.96	7107.07	7309.64	7451.12	7559.35	7650.12	7718.98	7737.63
OECD Env-Growth	SSP5	RUS	GDP|PPP	billion US$2005/yr	2015.12	2448.33	2971.31	3726.04	4743.16	5929.02	7064.47	8032.7	8809.91	9522.8	10321.7	11141.2	11875.8	12475.2	13007.3	13531.1	14065.2	14591.5	15024.6
IIASA GDP	SSP1	RWA	GDP|PPP	billion US$2005/yr	11.071	15.6532	20.2861	24.8739	30.3496	37.3558	46.6867	59.1672	75.8494	97.2582	124.314	156.875	194.309	234.74	277.558	327.745	384.358	443.509	499.539
IIASA GDP	SSP2	RWA	GDP|PPP	billion US$2005/yr	11.071	14.8329	18.0579	20.9057	24.407	28.6574	33.9513	40.6328	49.201	59.9139	73.3116	89.6418	109.22	132.172	159.083	190.615	227.358	269.401	316.242
IIASA GDP	SSP3	RWA	GDP|PPP	billion US$2005/yr	11.071	14.2477	16.352	17.6867	19.3075	21.088	23.0905	25.3694	28.0158	31.0164	34.4024	38.0613	41.9057	45.836	49.8591	54.007	58.3106	62.7234	67.2318
IIASA GDP	SSP4	RWA	GDP|PPP	billion US$2005/yr	11.071	14.2334	16.4111	17.9795	20.1012	22.7113	25.9252	29.8424	34.6451	40.4358	47.3825	55.43	64.5122	74.5187	85.4973	97.555	110.811	125.246	140.889
IIASA GDP	SSP5	RWA	GDP|PPP	billion US$2005/yr	11.071	15.6737	20.5407	25.8174	32.7033	42.1462	55.3866	73.8827	99.5765	133.927	178.994	235.379	302.597	377.76	459.502	555.828	665.249	782.366	908.472
OECD Env-Growth	SSP1	RWA	GDP|PPP	billion US$2005/yr	11.057	15.588	21.72	31.635	46.865	69.449	100.651	141.665	193.498	257.445	334.865	424.639	524.802	631.154	743.125	859.408	978.318	1097.09	1210.62
OECD Env-Growth	SSP2	RWA	GDP|PPP	billion US$2005/yr	11.057	15.78	22.017	30.896	42.639	57.661	77.102	101.893	133.066	172.205	221.215	281.119	352.748	436.124	532.159	641.89	766.458	905.738	1058.26
OECD Env-Growth	SSP3	RWA	GDP|PPP	billion US$2005/yr	11.057	15.925	22.27	29.97	38.695	47.983	58.621	70.776	84.64	100.801	119.811	141.854	166.935	194.836	225.513	259.002	295.446	334.669	376.453
OECD Env-Growth	SSP4	RWA	GDP|PPP	billion US$2005/yr	11.057	15.927	22.225	29.559	37.473	45.069	53.247	62.11	71.771	82.603	94.847	108.458	123.334	139.219	156.025	173.849	192.791	212.815	233.938
OECD Env-Growth	SSP5	RWA	GDP|PPP	billion US$2005/yr	11.057	15.588	21.839	32.892	51.569	81.215	123.303	179.864	252.803	344.69	458.483	594.234	750.624	923.321	1113.14	1319.65	1541.86	1776.96	2017.61
IIASA GDP	SSP1	SAU	GDP|PPP	billion US$2005/yr	545.648	667.705	712.923	764.296	848.896	966.977	1109.04	1260.4	1402.19	1522.91	1623.98	1720.1	1822.79	1935.24	2054.85	2177.31	2298.94	2411.65	2509.76
IIASA GDP	SSP2	SAU	GDP|PPP	billion US$2005/yr	545.648	669.09	716.042	769.583	859.023	986.103	1142.5	1314.34	1483.24	1637.93	1777.04	1906.72	2038.48	2178.27	2328.53	2486.55	2648.9	2812.27	2974.24
IIASA GDP	SSP3	SAU	GDP|PPP	billion US$2005/yr	545.648	667.953	711.887	749.583	813.962	910.661	1038.92	1189.66	1349.8	1512	1673.67	1836.45	2002.87	2176.83	2360.68	2559.46	2775.7	3009.8	3259.63
IIASA GDP	SSP4	SAU	GDP|PPP	billion US$2005/yr	545.648	672.208	724.858	775.897	854.962	968.432	1116.45	1290.6	1477.88	1670.6	1864.99	2059.64	2256.01	2457.93	2667.89	2891.05	3129.16	3381.07	3642.54
IIASA GDP	SSP5	SAU	GDP|PPP	billion US$2005/yr	545.648	670.769	726.867	799.859	917.141	1077.84	1270.34	1477.04	1675.1	1858.29	2047.53	2258.87	2499.38	2764.73	3049.73	3347.74	3653.19	3953	4236.63
OECD Env-Growth	SSP1	SAU	GDP|PPP	billion US$2005/yr	563.632	728.092	892.067	1087.37	1327.42	1565.66	1800.41	2024.78	2233.45	2433.63	2634.81	2832.3	3011.95	3171.01	3325.73	3470.44	3603.28	3714.35	3793.67
OECD Env-Growth	SSP2	SAU	GDP|PPP	billion US$2005/yr	563.632	731.943	901.722	1095.86	1321.32	1529.97	1746.9	1957.95	2157.09	2357.09	2567.49	2788.24	3013.63	3245.85	3492.95	3748.54	4010.4	4271.52	4526.37
OECD Env-Growth	SSP3	SAU	GDP|PPP	billion US$2005/yr	563.632	731.455	900.64	1093.31	1329.94	1570.29	1813.8	2027.66	2190.21	2310.45	2408.98	2504.32	2604.36	2717.44	2847.96	2991.43	3147.39	3313.09	3486.56
OECD Env-Growth	SSP4	SAU	GDP|PPP	billion US$2005/yr	563.632	736.114	918.466	1140.39	1433.98	1763.59	2119.83	2473.28	2804.4	3127	3462.64	3825.76	4226.22	4675.47	5180.1	5731.92	6327.56	6961.3	7629.63
OECD Env-Growth	SSP5	SAU	GDP|PPP	billion US$2005/yr	563.632	732.721	908.468	1142.89	1475.35	1875.49	2321.64	2775.01	3206.02	3620.06	4035.93	4455.06	4861.84	5253.75	5653.02	6055.51	6456.18	6836.44	7174.79
IIASA GDP	SSP1	SDN	GDP|PPP	billion US$2005/yr	93.6711	130.98	175.764	234.988	307.745	393.765	475.798	560.772	659.972	785.78	938.481	1111.19	1292.44	1468.87	1629.66	1767.88	1881.41	1970.96	2044.19
IIASA GDP	SSP2	SDN	GDP|PPP	billion US$2005/yr	93.6711	127.024	164.431	212.182	270.626	338.218	410.81	490.408	575.962	671.931	782.281	909.345	1056.45	1224.48	1410.83	1608.82	1810.56	2008.25	2195.92
IIASA GDP	SSP3	SDN	GDP|PPP	billion US$2005/yr	93.6711	123.212	152.372	184.442	219.431	254.08	284.536	311.615	335.074	357.875	382.847	411.505	443.312	477.405	513.347	550.602	589.455	629.819	672.147
IIASA GDP	SSP4	SDN	GDP|PPP	billion US$2005/yr	93.6711	122.76	151.902	184.88	222.934	263.276	302.573	341.528	379.543	419.761	465.74	519.533	580.678	648.197	721.762	800.923	886.423	978.427	1077.83
IIASA GDP	SSP5	SDN	GDP|PPP	billion US$2005/yr	93.6711	131.196	177.921	243.327	329.403	438.216	551.506	676.432	826.507	1018.57	1255.25	1528.59	1822.33	2115.79	2391.09	2668.8	2975.51	3326.25	3717.18
OECD Env-Growth	SSP1	SDN	GDP|PPP	billion US$2005/yr	88.125	97.496	140.428	192.052	270.197	385.06	542.598	750.812	1016.53	1346.45	1743.01	2199.59	2703.83	3252.04	3823.41	4413.95	5011.09	5597.6	6158.04
OECD Env-Growth	SSP2	SDN	GDP|PPP	billion US$2005/yr	88.125	98.954	143.68	190.677	251.296	328.398	429.305	559.388	723.949	930.143	1186.84	1502.18	1882.01	2330.29	2846.78	3432.82	4088.67	4812.24	5592.93
OECD Env-Growth	SSP3	SDN	GDP|PPP	billion US$2005/yr	88.125	100.316	146.679	190.2	239.335	293.722	358.799	435.379	523.304	623.845	740.613	876.514	1033.53	1212.71	1411.62	1632.11	1876.3	2146.52	2440.32
OECD Env-Growth	SSP4	SDN	GDP|PPP	billion US$2005/yr	88.125	100.473	147.116	188.58	231.459	272.486	316.712	364.275	414.476	467.998	526.559	591.317	662.833	741.5	826.327	918.548	1019.44	1130.41	1251.05
OECD Env-Growth	SSP5	SDN	GDP|PPP	billion US$2005/yr	88.125	97.59	141.372	198.338	293.127	442.913	655.886	945.613	1325	1808.68	2405.97	3114.64	3923.94	4835.18	5824.04	6890.07	8018.97	9186.41	10368.3
IIASA GDP	SSP1	SEN	GDP|PPP	billion US$2005/yr	17.915	24.0142	31.4343	41.2313	52.6799	66.2917	82.3967	101.597	124.328	150.12	178.176	208.016	241.441	278.231	317.08	355.746	392.766	427.202	458.709
IIASA GDP	SSP2	SEN	GDP|PPP	billion US$2005/yr	17.915	22.8111	28.0143	34.4288	41.7994	50.2959	60.0443	71.4775	85.0432	100.961	119.354	140.641	165.32	193.863	226.881	264.808	307.701	355.175	406.416
IIASA GDP	SSP3	SEN	GDP|PPP	billion US$2005/yr	17.915	22.1824	26.2265	30.6873	35.3191	39.94	44.4732	49.0426	53.9131	59.2989	65.2429	71.7307	78.7003	86.0569	93.7571	101.819	110.345	119.369	128.984
IIASA GDP	SSP4	SEN	GDP|PPP	billion US$2005/yr	17.915	22.1206	26.129	30.6623	35.7029	41.2049	47.2341	53.9787	61.8348	71.1732	82.1792	94.9446	109.501	125.846	144.051	164.303	186.937	212.193	240.422
IIASA GDP	SSP5	SEN	GDP|PPP	billion US$2005/yr	17.915	23.9999	31.5975	42.0764	55.1346	71.6874	92.4526	118.408	150.323	187.744	229.659	275.454	327.957	386.927	450.372	514.783	578.524	648.013	729.295
OECD Env-Growth	SSP1	SEN	GDP|PPP	billion US$2005/yr	21.61	25.957	33.917	46.666	65.615	93.15	130.848	180.07	241.957	317.313	405.712	505.726	614.187	727.984	847.086	969.927	1093.65	1215.45	1331.82
OECD Env-Growth	SSP2	SEN	GDP|PPP	billion US$2005/yr	21.61	26.368	34.502	45.789	60.497	79.196	103.721	135.506	176.219	227.712	291.739	370.085	464.086	574.713	703.426	851.405	1019.21	1206.69	1412.85
OECD Env-Growth	SSP3	SEN	GDP|PPP	billion US$2005/yr	21.61	26.77	35.615	46.109	57.881	70.399	85.155	102.493	122.71	146.369	173.965	206.155	243.252	285.411	332.78	385.436	443.882	508.461	579.748
OECD Env-Growth	SSP4	SEN	GDP|PPP	billion US$2005/yr	21.61	26.72	35.374	45.253	55.841	66.074	77.511	90.347	104.688	120.802	138.802	159.016	181.528	206.268	233.213	262.508	294.497	329.508	368.084
OECD Env-Growth	SSP5	SEN	GDP|PPP	billion US$2005/yr	21.61	25.902	33.764	47.296	69.433	103.868	152.107	216.178	297.812	398.463	518.122	656.235	809.587	975.527	1156.35	1351.62	1559.49	1777.97	2003.33
IIASA GDP	SSP1	SGP	GDP|PPP	billion US$2005/yr	220.375	292.649	333.976	362.303	385.142	411.62	441.986	474.387	505.958	534.996	560.358	580.691	595.68	604.226	606.937	603.53	593.236	576.823	555.445
IIASA GDP	SSP2	SGP	GDP|PPP	billion US$2005/yr	220.375	292.377	332.972	360.294	382.665	408.95	439.375	472.026	503.61	532.459	558.719	582.212	602.795	619.907	633.422	642.774	648.05	650.283	650.162
IIASA GDP	SSP3	SGP	GDP|PPP	billion US$2005/yr	220.375	281.341	302.797	308.944	313.806	324.511	340.145	358.357	376.317	393.181	409.464	425.976	442.822	459.562	475.698	491.03	505.935	521.174	537.096
IIASA GDP	SSP4	SGP	GDP|PPP	billion US$2005/yr	220.375	291.19	328.392	349.417	362.725	377.742	394.743	411.955	426.93	439.028	448.596	455.681	460.474	462.556	461.94	458.3	451.659	442.431	430.771
IIASA GDP	SSP5	SGP	GDP|PPP	billion US$2005/yr	220.375	294.751	340.817	376.803	409.507	448.553	494.081	543.958	594.911	644.946	692.367	734.24	768.938	794.55	811.792	820.568	819.674	809.257	790.335
OECD Env-Growth	SSP1	SGP	GDP|PPP	billion US$2005/yr	264.851	321.858	383.146	437.545	483.045	517.975	546.53	566.644	577.117	583.244	586.039	583.886	578.118	567.147	553.062	534.846	513.352	489.49	463.403
OECD Env-Growth	SSP2	SGP	GDP|PPP	billion US$2005/yr	264.851	322.159	383.624	437.801	482.868	518.602	549.103	574.046	593.143	610.322	625.022	634.877	642.065	645.719	646.645	643.797	637.482	627.918	615.978
OECD Env-Growth	SSP3	SGP	GDP|PPP	billion US$2005/yr	264.851	318.929	376.162	419.856	448.454	464.173	474.666	480.377	482.097	484.167	485.531	485.233	486.099	487.42	488.271	486.235	481.48	474.255	466.093
OECD Env-Growth	SSP4	SGP	GDP|PPP	billion US$2005/yr	264.851	321.559	380.905	431.099	471.085	498.315	519.092	533.827	543.116	551.99	560.245	564.393	565.763	563.272	558.114	548.944	537.221	523.451	507.221
OECD Env-Growth	SSP5	SGP	GDP|PPP	billion US$2005/yr	264.851	325.386	390.953	455.392	516.057	570.744	622.6	669.228	708.234	744.833	780.643	811.835	837.121	853.743	864.415	868.257	866.283	859.517	846.81
IIASA GDP	SSP1	SLB	GDP|PPP	billion US$2005/yr	0.974027	1.61952	2.47263	3.58171	4.76292	6.01375	7.3259	8.76393	10.3934	12.1924	14.0772	16.2025	18.4941	20.7825	22.8489	24.6074	26.0852	27.5245	29.0874
IIASA GDP	SSP2	SLB	GDP|PPP	billion US$2005/yr	0.974027	1.59056	2.33672	3.23322	4.13138	5.05522	6.01834	7.09157	8.33008	9.74945	11.3314	13.0689	14.95	16.9502	19.0918	21.7605	24.8826	28.2267	31.4542
IIASA GDP	SSP3	SLB	GDP|PPP	billion US$2005/yr	0.974027	1.58095	2.3459	3.28747	4.21513	5.08485	5.88253	6.67314	7.49411	8.3561	9.25165	10.1799	11.135	12.111	13.128	14.1898	15.3102	16.4939	17.7685
IIASA GDP	SSP4	SLB	GDP|PPP	billion US$2005/yr	0.974027	1.577	2.27817	3.07597	3.81891	4.53005	5.22665	5.97605	6.8173	7.76426	8.81337	9.95898	11.1887	12.4912	13.8854	15.377	16.9842	18.7165	20.609
IIASA GDP	SSP5	SLB	GDP|PPP	billion US$2005/yr	0.974027	1.62151	2.49667	3.68294	5.03129	6.56005	8.26875	10.2318	12.5292	15.142	17.9699	21.2117	24.7689	28.3999	32.1424	36.2269	40.8125	45.8585	51.2484
OECD Env-Growth	SSP1	SLB	GDP|PPP	billion US$2005/yr	1.308	1.688	2.15	2.941	4.088	5.664	7.681	10.166	13.115	16.496	20.235	24.21	28.235	32.19	36.17	40.069	43.792	47.252	50.35
OECD Env-Growth	SSP2	SLB	GDP|PPP	billion US$2005/yr	1.308	1.708	2.162	2.846	3.708	4.753	6.035	7.6	9.504	11.783	14.459	17.541	21.019	24.903	29.247	34.048	39.258	44.812	50.644
OECD Env-Growth	SSP3	SLB	GDP|PPP	billion US$2005/yr	1.308	1.719	2.165	2.764	3.437	4.158	4.97	5.894	6.94	8.107	9.397	10.815	12.354	14.026	15.85	17.805	19.898	22.128	24.524
OECD Env-Growth	SSP4	SLB	GDP|PPP	billion US$2005/yr	1.308	1.719	2.15	2.699	3.311	3.925	4.591	5.329	6.146	7.04	8.009	9.053	10.169	11.364	12.654	14.027	15.489	17.047	18.733
OECD Env-Growth	SSP5	SLB	GDP|PPP	billion US$2005/yr	1.308	1.688	2.156	3.024	4.405	6.44	9.135	12.552	16.725	21.654	27.285	33.499	40.07	46.849	53.998	61.383	68.875	76.339	83.601
IIASA GDP	SSP1	SLE	GDP|PPP	billion US$2005/yr	4.47224	7.64383	10.5248	14.1303	18.4752	23.8396	30.066	37.6897	47.4034	60.0413	75.8767	94.6877	115.823	138.277	161.037	183.187	204.075	223.261	240.52
IIASA GDP	SSP2	SLE	GDP|PPP	billion US$2005/yr	4.47224	7.3749	9.59598	12.0414	14.7357	17.7892	21.4309	25.8487	31.2346	37.7084	45.4256	54.4414	64.78	76.4877	90.1659	106.137	124.504	144.985	167.218
IIASA GDP	SSP3	SLE	GDP|PPP	billion US$2005/yr	4.47224	7.21803	8.96792	10.5183	11.8885	13.1081	14.2644	15.4157	16.6076	17.8575	19.176	20.538	21.9279	23.3121	24.7067	26.1137	27.551	29.0305	30.5587
IIASA GDP	SSP4	SLE	GDP|PPP	billion US$2005/yr	4.47224	7.21255	9.02823	10.7847	12.5615	14.3853	16.3557	18.5401	21.0194	23.8464	27.0788	30.6993	34.6912	38.9986	43.653	48.6667	54.0892	59.9647	66.3285
IIASA GDP	SSP5	SLE	GDP|PPP	billion US$2005/yr	4.47224	7.66448	10.7147	14.8494	20.3219	27.6498	36.8308	48.7245	64.5392	85.856	113.598	147.837	187.701	231.417	276.961	322.417	366.331	411.912	463.071
OECD Env-Growth	SSP1	SLE	GDP|PPP	billion US$2005/yr	4.352	7.138	9.21	12.854	18.897	28.326	41.953	60.731	85.432	116.666	154.657	198.543	246.912	298.296	352.686	408.621	464.701	519.716	571.939
OECD Env-Growth	SSP2	SLE	GDP|PPP	billion US$2005/yr	4.352	7.215	9.313	12.477	16.928	22.855	30.844	41.441	55.275	73.085	95.652	123.423	156.742	195.874	241.353	293.193	351.408	415.848	486.05
OECD Env-Growth	SSP3	SLE	GDP|PPP	billion US$2005/yr	4.352	7.236	9.301	11.974	15.142	18.597	22.619	27.304	32.722	38.946	46.004	53.856	62.534	72.007	82.313	93.372	105.177	117.767	131.16
OECD Env-Growth	SSP4	SLE	GDP|PPP	billion US$2005/yr	4.352	7.25	9.333	11.951	14.922	17.861	21.072	24.603	28.467	32.681	37.224	42.024	47.082	52.362	57.888	63.604	69.526	75.714	82.23
OECD Env-Growth	SSP5	SLE	GDP|PPP	billion US$2005/yr	4.352	7.151	9.293	13.401	20.917	33.596	52.758	80.109	117.173	165.315	225.485	297.106	378.75	468.73	567.385	672.996	783.683	897.746	1012.33
IIASA GDP	SSP1	SLV	GDP|PPP	billion US$2005/yr	38.244	42.8305	46.9583	52.263	58.8361	66.3858	75.892	86.9724	98.5308	108.882	117.042	123.063	127.485	130.734	133.367	136.343	139.96	143.912	147.573
IIASA GDP	SSP2	SLV	GDP|PPP	billion US$2005/yr	38.244	42.5702	45.6556	49.4135	54.3142	60.4644	67.5862	75.2771	84.5131	94.7903	105.236	115.092	124.313	132.898	140.794	148.014	154.631	161.599	169.714
IIASA GDP	SSP3	SLV	GDP|PPP	billion US$2005/yr	38.244	42.5754	45.3762	48.8243	53.4542	59.44	66.2869	73.3767	80.2014	86.7036	92.82	98.928	105.825	113.675	122.189	131.01	140.281	150.327	161.53
IIASA GDP	SSP4	SLV	GDP|PPP	billion US$2005/yr	38.244	41.8923	43.1702	44.0177	45.0956	46.7507	48.8457	51.0733	53.1195	54.8322	55.9949	56.7907	57.6781	58.7737	59.9578	61.0198	61.9512	62.8275	63.6232
IIASA GDP	SSP5	SLV	GDP|PPP	billion US$2005/yr	38.244	42.6177	46.2609	50.6298	55.9149	61.9079	70.0649	79.7484	89.4659	97.1606	101.734	103.623	104.821	106.828	110.189	114.711	120.001	125.768	131.814
OECD Env-Growth	SSP1	SLV	GDP|PPP	billion US$2005/yr	37.019	39.932	45.372	52.418	61.881	73.77	87.514	102.403	117.618	132.479	146.211	159.377	172.33	184.458	195.866	206.446	216.061	224.643	231.928
OECD Env-Growth	SSP2	SLV	GDP|PPP	billion US$2005/yr	37.019	40.141	45.643	51.785	58.669	66.269	75.07	84.889	95.472	106.592	118.025	130.517	144.455	159.482	175.472	192.445	210.529	229.913	250.601
OECD Env-Growth	SSP3	SLV	GDP|PPP	billion US$2005/yr	37.019	40.757	47.412	54.392	61.061	67.489	74.515	82.054	89.977	98.124	106.517	115.799	126.469	138.234	150.83	164.164	178.508	194.131	211.306
OECD Env-Growth	SSP4	SLV	GDP|PPP	billion US$2005/yr	37.019	39.991	44.998	49.513	53.621	56.465	58.87	60.716	61.974	62.632	62.7	62.602	62.552	62.372	62.055	61.631	61.222	60.899	60.64
OECD Env-Growth	SSP5	SLV	GDP|PPP	billion US$2005/yr	37.019	39.591	44.143	50.54	60.069	72.442	86.015	99.748	112.677	124.149	133.389	141.596	149.187	156.124	163.515	171.04	178.947	187.699	197.481
IIASA GDP	SSP1	SOM	GDP|PPP	billion US$2005/yr	4.43054	5.42123	7.60462	10.8702	15.0581	20.123	26.4424	34.0752	43.4821	54.6712	67.6002	82.5962	100.17	120.387	142.769	166.582	191.057	215.542	239.646
IIASA GDP	SSP2	SOM	GDP|PPP	billion US$2005/yr	4.43054	5.26533	7.07541	9.63326	12.764	16.3328	20.5527	25.4196	31.23	38.1044	46.1475	55.5181	66.5608	79.6251	95.0207	113.084	133.948	159.867	191.322
IIASA GDP	SSP3	SOM	GDP|PPP	billion US$2005/yr	4.43054	5.20017	6.83827	8.98444	11.4987	14.0461	16.5863	18.9033	21.1612	23.3967	25.7437	28.2596	31.0377	34.0686	37.2999	40.6917	44.2188	47.9194	51.8182
IIASA GDP	SSP4	SOM	GDP|PPP	billion US$2005/yr	4.43054	5.16637	6.73517	8.78429	11.2471	13.9033	16.849	19.9464	23.4293	27.3597	31.8901	37.1123	43.2199	50.3239	58.4791	67.7565	78.2306	90.071	103.434
IIASA GDP	SSP5	SOM	GDP|PPP	billion US$2005/yr	4.43054	5.4016	7.55672	10.8182	15.1247	20.5597	27.6422	36.5365	47.8039	61.3243	76.7842	94.9199	116.463	141.534	169.445	199.446	230.955	263.647	300.834
OECD Env-Growth	SSP1	SOM	GDP|PPP	billion US$2005/yr	0.315	0.382	0.539	0.852	1.451	2.534	4.338	7.178	11.428	17.418	25.373	35.367	47.25	60.773	75.842	92.227	109.402	126.808	143.806
OECD Env-Growth	SSP2	SOM	GDP|PPP	billion US$2005/yr	0.315	0.361	0.487	0.697	1.006	1.431	2.056	2.97	4.296	6.171	8.74	12.199	16.751	22.63	30.08	39.31	50.446	63.597	78.844
OECD Env-Growth	SSP3	SOM	GDP|PPP	billion US$2005/yr	0.315	0.349	0.455	0.614	0.81	1.022	1.291	1.641	2.093	2.665	3.377	4.253	5.323	6.617	8.164	9.986	12.098	14.526	17.29
OECD Env-Growth	SSP4	SOM	GDP|PPP	billion US$2005/yr	0.315	0.346	0.442	0.576	0.721	0.838	0.966	1.109	1.271	1.448	1.638	1.844	2.067	2.309	2.57	2.851	3.152	3.479	3.837
OECD Env-Growth	SSP5	SOM	GDP|PPP	billion US$2005/yr	0.315	0.381	0.541	0.901	1.68	3.221	5.828	9.873	15.736	23.666	33.709	45.895	59.922	75.504	92.927	112.271	133.38	155.994	179.603
IIASA GDP	SSP1	SRB	GDP|PPP	billion US$2005/yr	62.9558	104.908	138.946	179.981	218.795	250.564	274.774	292.873	307.522	322.024	337.718	353.944	369.63	383.757	395.644	404.923	410.807	412.867	411.082
IIASA GDP	SSP2	SRB	GDP|PPP	billion US$2005/yr	62.9558	105.286	138.843	177.778	213.549	243.085	266.869	286.56	303.782	320.876	338.997	357.611	375.581	392.261	407.57	421.724	434.92	447.175	458.353
IIASA GDP	SSP3	SRB	GDP|PPP	billion US$2005/yr	62.9558	105.333	138.093	174.472	205.972	230.451	249.019	263.766	276.896	290.271	304.662	320.258	336.99	355.236	375.437	397.899	422.454	448.693	476.226
IIASA GDP	SSP4	SRB	GDP|PPP	billion US$2005/yr	62.9558	104.82	136.176	169.82	197.029	216.122	228.746	236.953	242.277	246.471	250.249	253.379	255.282	255.992	255.711	254.682	252.96	250.382	246.721
IIASA GDP	SSP5	SRB	GDP|PPP	billion US$2005/yr	62.9558	105.049	140.253	184.877	230.652	272.425	308.867	341.841	374.753	410.545	450.1	491.752	533.634	573.787	610.692	643.273	669.803	689.01	700.417
OECD Env-Growth	SSP1	SRB	GDP|PPP	billion US$2005/yr	69.977	75.523	85.304	98.792	115.046	133.016	151.633	169.736	186.969	203.924	220.541	235.333	246.761	255.185	261.817	266.316	268.756	269.036	266.991
OECD Env-Growth	SSP2	SRB	GDP|PPP	billion US$2005/yr	69.977	75.597	85.208	97.278	109.763	121.685	133.625	145.604	158.024	171.63	186.523	201.467	215.505	228.818	241.776	253.989	265.396	275.949	285.754
OECD Env-Growth	SSP3	SRB	GDP|PPP	billion US$2005/yr	69.977	75.67	84.747	94.445	102.81	108.937	114.096	118.698	123.484	129.227	136.097	143.438	150.885	158.828	167.313	175.924	184.671	193.57	202.822
OECD Env-Growth	SSP4	SRB	GDP|PPP	billion US$2005/yr	69.977	75.445	84.243	94.773	105.93	116.592	127.177	137.564	148.188	159.799	172.42	184.53	194.99	203.955	211.904	218.376	223.617	227.617	230.118
OECD Env-Growth	SSP5	SRB	GDP|PPP	billion US$2005/yr	69.977	75.549	85.679	101.555	123.022	148.991	177.38	206.922	236.933	268.041	300.277	331.213	358.364	381.646	402.23	420.077	435.259	447.611	456.572
IIASA GDP	SSP1	STP	GDP|PPP	billion US$2005/yr	0.289209	0.379191	0.462212	0.531667	0.598568	0.674905	0.768491	0.879077	1.00987	1.16795	1.35117	1.55744	1.78273	2.02435	2.28301	2.55149	2.87706	3.22776	3.55924
IIASA GDP	SSP2	STP	GDP|PPP	billion US$2005/yr	0.289209	0.372497	0.442346	0.493061	0.538368	0.587293	0.645994	0.714846	0.795932	0.893962	1.00833	1.14146	1.29627	1.47854	1.69318	1.94507	2.23491	2.56102	2.9232
IIASA GDP	SSP3	STP	GDP|PPP	billion US$2005/yr	0.289209	0.372546	0.443772	0.497824	0.544542	0.588406	0.633605	0.680042	0.729112	0.784039	0.843951	0.907525	0.974324	1.04523	1.12095	1.20118	1.28593	1.37597	1.47273
IIASA GDP	SSP4	STP	GDP|PPP	billion US$2005/yr	0.289209	0.369373	0.433039	0.474574	0.508706	0.543037	0.584223	0.632675	0.690477	0.761345	0.84428	0.93867	1.04498	1.16558	1.30235	1.45658	1.62956	1.823	2.03933
IIASA GDP	SSP5	STP	GDP|PPP	billion US$2005/yr	0.289209	0.377373	0.456505	0.520071	0.582118	0.656315	0.751239	0.86588	1.00222	1.16407	1.34478	1.54267	1.75391	1.97776	2.23085	2.5141	2.87263	3.30322	3.81106
OECD Env-Growth	SSP1	STP	GDP|PPP	billion US$2005/yr	0.29	0.473	0.986	1.494	2.189	3.046	4.001	4.997	5.994	6.969	7.87	8.693	9.421	10.067	10.673	11.239	11.758	12.229	12.646
OECD Env-Growth	SSP2	STP	GDP|PPP	billion US$2005/yr	0.29	0.478	0.994	1.439	1.96	2.529	3.153	3.818	4.522	5.261	6.014	6.799	7.62	8.488	9.422	10.437	11.532	12.703	13.959
OECD Env-Growth	SSP3	STP	GDP|PPP	billion US$2005/yr	0.29	0.483	1.024	1.475	1.97	2.473	3.011	3.577	4.168	4.779	5.39	6.014	6.661	7.339	8.045	8.769	9.509	10.275	11.078
OECD Env-Growth	SSP4	STP	GDP|PPP	billion US$2005/yr	0.29	0.48	0.998	1.38	1.764	2.101	2.431	2.753	3.074	3.392	3.696	4.006	4.333	4.683	5.056	5.45	5.868	6.318	6.81
OECD Env-Growth	SSP5	STP	GDP|PPP	billion US$2005/yr	0.29	0.47	0.976	1.508	2.279	3.23	4.229	5.199	6.1	6.92	7.612	8.224	8.749	9.227	9.765	10.36	11.021	11.753	12.555
IIASA GDP	SSP1	SUR	GDP|PPP	billion US$2005/yr	5.11955	7.56591	9.61246	11.7232	13.6139	15.5132	17.4015	19.1991	20.8367	22.3709	23.8394	25.2369	26.5531	27.7686	28.8634	29.8255	30.6147	31.2066	31.5555
IIASA GDP	SSP2	SUR	GDP|PPP	billion US$2005/yr	5.11955	7.55486	9.51254	11.4944	13.3067	15.0301	16.6704	18.318	20.0565	21.8584	23.6869	25.5134	27.3317	29.1406	30.9413	32.7206	34.4455	36.0939	37.6511
IIASA GDP	SSP3	SUR	GDP|PPP	billion US$2005/yr	5.11955	7.55445	9.47567	11.4039	13.1687	14.8598	16.4919	18.1488	19.7039	21.1876	22.6681	24.1502	25.6552	27.2343	28.8873	30.6	32.364	34.1842	36.0877
IIASA GDP	SSP4	SUR	GDP|PPP	billion US$2005/yr	5.11955	7.50388	9.25448	10.8085	11.975	12.8968	13.6444	14.3167	14.8223	15.1691	15.3966	15.5061	15.5116	15.4497	15.3452	15.1936	14.9839	14.7348	14.4591
IIASA GDP	SSP5	SUR	GDP|PPP	billion US$2005/yr	5.11955	7.56691	9.65221	11.8797	13.994	16.2452	18.6197	21.0772	23.5532	26.0845	28.6791	31.3084	33.9446	36.5437	39.0598	41.4601	43.6742	45.6507	47.2995
OECD Env-Growth	SSP1	SUR	GDP|PPP	billion US$2005/yr	3.73	4.611	5.86	7.528	9.61	12.057	14.714	17.499	20.25	22.935	25.491	27.771	29.768	31.547	33.146	34.556	35.756	36.751	37.476
OECD Env-Growth	SSP2	SUR	GDP|PPP	billion US$2005/yr	3.73	4.637	5.91	7.417	9.079	10.872	12.845	15.011	17.311	19.762	22.345	24.988	27.726	30.603	33.563	36.566	39.569	42.552	45.548
OECD Env-Growth	SSP3	SUR	GDP|PPP	billion US$2005/yr	3.73	4.661	5.965	7.394	8.823	10.217	11.67	13.218	14.826	16.508	18.257	20.037	21.929	23.992	26.156	28.389	30.672	33.025	35.509
OECD Env-Growth	SSP4	SUR	GDP|PPP	billion US$2005/yr	3.73	4.621	5.856	7.278	8.864	10.55	12.334	14.2	16.068	17.941	19.797	21.534	23.162	24.721	26.195	27.551	28.788	29.919	30.935
OECD Env-Growth	SSP5	SUR	GDP|PPP	billion US$2005/yr	3.73	4.604	5.872	7.717	10.196	13.258	16.654	20.303	24.038	27.833	31.635	35.291	38.754	42.061	45.277	48.398	51.399	54.283	56.917
IIASA GDP	SSP1	SVK	GDP|PPP	billion US$2005/yr	107.715	128.347	138.902	143.885	149.804	157.633	167.386	178.111	189.139	200.58	213.025	226.484	240.54	254.727	268.497	281.13	292.823	304.333	316.42
IIASA GDP	SSP2	SVK	GDP|PPP	billion US$2005/yr	107.715	128.707	139.148	143.014	146.81	151.926	158.786	166.86	175.255	183.69	192.374	201.207	209.908	218.346	226.501	234.449	242.481	250.929	259.941
IIASA GDP	SSP3	SVK	GDP|PPP	billion US$2005/yr	107.715	128.469	137.484	138.358	137.671	137.257	137.766	138.812	139.638	139.729	139.19	138.132	136.729	135.09	133.323	131.506	129.755	128.085	126.419
IIASA GDP	SSP4	SVK	GDP|PPP	billion US$2005/yr	107.715	128.74	138.77	141.572	143.546	146.365	150.653	156.004	161.578	166.908	172.06	176.889	181.262	185.03	188.111	190.506	192.488	194.333	196.214
IIASA GDP	SSP5	SVK	GDP|PPP	billion US$2005/yr	107.715	128.769	141.14	149.852	161.594	177.151	196.372	219.254	245.751	276.173	311.248	351.07	395.158	443.122	494.485	548.403	605.192	666.193	732.859
OECD Env-Growth	SSP1	SVK	GDP|PPP	billion US$2005/yr	109.477	128.516	151.136	174.284	199.621	225.925	250.611	272.184	291.068	308.543	326.603	345.631	364.12	380.779	395.337	408.036	419.464	430.572	441.678
OECD Env-Growth	SSP2	SVK	GDP|PPP	billion US$2005/yr	109.477	128.352	150.276	171.455	193.537	216.377	238.835	259.798	279.48	298.468	318.213	338.907	359.302	378.259	395.525	411.855	427.756	444.044	461.037
OECD Env-Growth	SSP3	SVK	GDP|PPP	billion US$2005/yr	109.477	127.663	147.51	164.428	179.723	192.917	203.499	210.587	214.592	216.487	217.738	218.585	217.859	215.032	210.649	205.489	200.146	194.916	189.534
OECD Env-Growth	SSP4	SVK	GDP|PPP	billion US$2005/yr	109.477	128.068	149.721	172.062	196.025	220.082	242.016	260.978	277.516	292.741	308.293	323.93	337.938	349.182	357.998	365.331	371.917	378.373	384.499
OECD Env-Growth	SSP5	SVK	GDP|PPP	billion US$2005/yr	109.477	129.02	153.703	181.714	214.758	251.185	288.236	325.41	363.638	404.576	450.954	503.59	561.414	623.089	687.53	754.771	825.527	901.925	985.895
IIASA GDP	SSP1	SVN	GDP|PPP	billion US$2005/yr	50.0633	53.3213	53.2817	53.582	55.6315	59.2689	63.9493	69.0623	74.295	79.8466	86.0347	92.9088	100.336	108.065	115.886	123.685	131.512	139.336	147.176
IIASA GDP	SSP2	SVN	GDP|PPP	billion US$2005/yr	50.0633	53.4741	53.4028	53.2645	54.4646	57.0043	60.5202	64.5674	68.7205	72.9991	77.6304	82.6776	88.0608	93.6616	99.3891	105.174	111.018	116.941	122.943
IIASA GDP	SSP3	SVN	GDP|PPP	billion US$2005/yr	50.0633	53.395	52.7405	51.2891	50.473	50.4837	51.0857	51.9204	52.6462	53.1281	53.48	53.8353	54.2647	54.6983	55.0559	55.3052	55.477	55.5771	55.5585
IIASA GDP	SSP4	SVN	GDP|PPP	billion US$2005/yr	50.0633	53.5622	53.4435	52.9722	53.4673	55.044	57.4518	60.3329	63.3194	66.3041	69.4096	72.646	75.9726	79.2348	82.2892	85.0381	87.5127	89.7567	91.7952
IIASA GDP	SSP5	SVN	GDP|PPP	billion US$2005/yr	50.0633	53.5317	54.2929	56.2041	60.7901	67.8882	76.9103	87.6361	100.178	114.935	132.399	152.747	175.938	201.794	230.17	261.011	294.47	330.59	369.453
OECD Env-Growth	SSP1	SVN	GDP|PPP	billion US$2005/yr	51.321	55.34	61.824	68.77	76.698	85.37	94.055	102.293	110.181	118.096	126.576	135.354	144.086	152.247	159.804	167.014	174.09	180.993	187.504
OECD Env-Growth	SSP2	SVN	GDP|PPP	billion US$2005/yr	51.321	55.258	61.451	67.575	74.277	81.706	89.664	97.688	105.793	114.186	123.307	132.863	142.561	152.015	161.164	170.234	179.386	188.693	197.986
OECD Env-Growth	SSP3	SVN	GDP|PPP	billion US$2005/yr	51.321	54.894	60.069	64.352	68.272	71.943	75.208	77.635	79.268	80.369	81.381	82.123	82.32	81.78	80.72	79.45	78.144	76.791	75.174
OECD Env-Growth	SSP4	SVN	GDP|PPP	billion US$2005/yr	51.321	55.134	61.294	67.891	75.292	83.178	90.892	98.084	104.869	111.535	118.592	125.647	132.287	138.15	143.36	148.148	152.702	157.038	160.839
OECD Env-Growth	SSP5	SVN	GDP|PPP	billion US$2005/yr	51.321	55.611	62.946	72.149	83.625	97.013	111.556	127.135	144.081	162.992	184.755	209.277	236.485	265.802	296.963	330.312	366.227	404.845	446.21
IIASA GDP	SSP1	SWE	GDP|PPP	billion US$2005/yr	319.326	378.859	453.143	554.083	661.047	765.855	867.069	965.622	1063.72	1164.82	1272.06	1384.7	1499.89	1614.88	1729.16	1842.06	1952.82	2060.11	2165.19
IIASA GDP	SSP2	SWE	GDP|PPP	billion US$2005/yr	319.326	379.006	452.463	550.368	650.954	745.984	835.049	920.151	1004.06	1089.79	1179.54	1272.28	1366.47	1461.09	1556.02	1651.39	1747.06	1841.9	1934.34
IIASA GDP	SSP3	SWE	GDP|PPP	billion US$2005/yr	319.326	345.444	356.011	369.856	385.075	400.569	417.325	435.108	453.494	472.211	491.114	509.572	527.454	544.207	559.195	571.945	582.715	591.733	599.036
IIASA GDP	SSP4	SWE	GDP|PPP	billion US$2005/yr	319.326	379.885	454.486	552.53	649.071	735.239	812.341	883.632	951.599	1018.28	1084.91	1150.11	1213.21	1272.94	1327.92	1376.72	1418.7	1453.09	1479.52
IIASA GDP	SSP5	SWE	GDP|PPP	billion US$2005/yr	319.326	380.895	462.329	579.863	715.545	861.214	1014.51	1176.61	1350.57	1541.31	1754.38	1990.64	2246.77	2519.83	2810.32	3119.34	3447.49	3794.38	4162.07
OECD Env-Growth	SSP1	SWE	GDP|PPP	billion US$2005/yr	316.691	364.76	413.889	465.017	520.594	581.391	647.333	716.717	785.581	851.502	920.738	1000.01	1082.13	1163.6	1244.26	1321.47	1396.67	1473.08	1551.14
OECD Env-Growth	SSP2	SWE	GDP|PPP	billion US$2005/yr	316.691	364.127	411.693	458.675	506.216	556.319	612.435	674.145	738.141	801.683	870.048	949.165	1032.84	1118.22	1204.81	1291.06	1378.47	1469.91	1564.96
OECD Env-Growth	SSP3	SWE	GDP|PPP	billion US$2005/yr	316.691	360.623	401.093	435.99	465.361	490.676	515.244	538.227	556.951	569.871	582.029	598.171	611.562	619.912	624.546	625.515	625.024	624.758	623.053
OECD Env-Growth	SSP4	SWE	GDP|PPP	billion US$2005/yr	316.691	363.034	409.058	457.556	509.856	565.837	624.986	685.83	744.706	799.092	854.835	917.137	977.821	1033.19	1084.87	1131.88	1176.24	1220.31	1261.01
OECD Env-Growth	SSP5	SWE	GDP|PPP	billion US$2005/yr	316.691	367.548	422.76	488.584	568.859	664.03	773.402	898.126	1035.5	1184.09	1353.66	1555.64	1786.62	2045.14	2328.64	2634.22	2965.84	3331.9	3740.03
IIASA GDP	SSP1	SWZ	GDP|PPP	billion US$2005/yr	4.60436	4.61435	5.45032	6.82415	8.86204	11.3917	14.2629	17.3482	20.5903	23.9117	27.2141	30.3815	33.3121	35.9283	38.2068	40.1659	41.8547	43.4897	45.4015
IIASA GDP	SSP2	SWZ	GDP|PPP	billion US$2005/yr	4.60436	4.62283	5.29658	6.22651	7.54524	9.22571	11.1884	13.3929	15.8203	18.4609	21.2731	24.1972	27.1762	30.1308	32.9942	35.7339	38.3248	40.7541	43.0116
IIASA GDP	SSP3	SWZ	GDP|PPP	billion US$2005/yr	4.60436	4.53783	4.87061	5.2419	5.75748	6.38785	7.02716	7.64179	8.1752	8.67183	9.23194	9.88224	10.6553	11.5461	12.5476	13.6484	14.8425	16.1253	17.4947
IIASA GDP	SSP4	SWZ	GDP|PPP	billion US$2005/yr	4.60436	4.52033	4.83974	5.20409	5.73131	6.41049	7.17011	7.99204	8.81513	9.67794	10.6918	11.8843	13.289	14.8957	16.6977	18.6854	20.8515	23.1852	25.6768
IIASA GDP	SSP5	SWZ	GDP|PPP	billion US$2005/yr	4.60436	4.61707	5.49396	6.99528	9.32072	12.3694	16.029	20.1678	24.7011	29.5178	34.4796	39.4151	44.1557	48.6312	53.4292	59.0445	65.7399	73.4449	82.0068
OECD Env-Growth	SSP1	SWZ	GDP|PPP	billion US$2005/yr	5.638	5.449	5.949	7.196	9.103	11.82	15.39	19.824	25.028	30.86	37.236	44.064	51.095	58.095	64.948	71.442	77.597	83.366	88.588
OECD Env-Growth	SSP2	SWZ	GDP|PPP	billion US$2005/yr	5.638	5.488	5.896	6.864	8.18	9.858	11.991	14.609	17.711	21.301	25.414	30.111	35.382	41.18	47.457	54.171	61.273	68.737	76.488
OECD Env-Growth	SSP3	SWZ	GDP|PPP	billion US$2005/yr	5.638	5.508	5.801	6.429	7.193	8.051	9.05	10.18	11.375	12.657	14.088	15.674	17.479	19.52	21.776	24.267	27.027	30.088	33.454
OECD Env-Growth	SSP4	SWZ	GDP|PPP	billion US$2005/yr	5.638	5.502	5.728	6.227	6.881	7.565	8.341	9.195	10.067	10.975	11.971	13.053	14.267	15.621	17.092	18.692	20.444	22.375	24.492
OECD Env-Growth	SSP5	SWZ	GDP|PPP	billion US$2005/yr	5.638	5.444	5.949	7.339	9.68	13.234	18.035	24.161	31.56	40.109	49.757	60.444	71.888	83.805	96.071	108.379	120.757	133.127	145.21
IIASA GDP	SSP1	SYR	GDP|PPP	billion US$2005/yr	86.945	106.34	138.929	178.079	221.728	268.796	318.895	370.528	424.115	479.048	545.524	620.774	698.153	767.489	824.804	868.779	901.161	928.482	952.554
IIASA GDP	SSP2	SYR	GDP|PPP	billion US$2005/yr	86.945	104.391	131.696	162.555	196.422	233.195	272.886	315.058	359.662	407.279	458.607	514.416	574.613	639.183	720.203	811.702	902.961	981.894	1046.28
IIASA GDP	SSP3	SYR	GDP|PPP	billion US$2005/yr	86.945	102.929	124.975	146.612	167.922	188.939	208.991	227.659	244.751	261.26	278.803	298.669	321.17	346.294	373.826	402.56	432.128	462.789	495.61
IIASA GDP	SSP4	SYR	GDP|PPP	billion US$2005/yr	86.945	102.293	124.059	145.823	168.197	191.254	214.895	238.818	262.834	287.868	315.811	348.173	385.292	427.045	473.176	522.397	574.505	630.061	690.562
IIASA GDP	SSP5	SYR	GDP|PPP	billion US$2005/yr	86.945	106.428	140.1	182.569	232.984	290.845	355.937	426.394	502.283	582.47	679.527	790.336	906.269	1018.31	1135.02	1263.45	1402.59	1544.97	1679.75
OECD Env-Growth	SSP1	SYR	GDP|PPP	billion US$2005/yr	96.934	108.843	161.611	219.35	298.783	402.103	526.701	670.624	830.194	999.356	1170.6	1338.6	1497.68	1651.79	1805.48	1949.48	2078.12	2188.92	2277.08
OECD Env-Growth	SSP2	SYR	GDP|PPP	billion US$2005/yr	96.934	109.666	163.696	218.194	285.665	365.048	458.302	566.821	690.889	828.865	978.068	1137.65	1306.67	1489.16	1685.86	1889.72	2098.22	2310.93	2529.04
OECD Env-Growth	SSP3	SYR	GDP|PPP	billion US$2005/yr	96.934	110.406	164.962	216.17	273.723	334.821	401.744	475.554	555.956	641.125	729.219	821.227	918.973	1026.28	1142.67	1264.37	1391.59	1526.55	1673.31
OECD Env-Growth	SSP4	SYR	GDP|PPP	billion US$2005/yr	96.934	110.352	164.303	212.553	265.691	318.332	373.669	432.64	494.994	559.163	623.587	689.173	757.606	832.024	911.991	994.667	1080.55	1171.8	1272.01
OECD Env-Growth	SSP5	SYR	GDP|PPP	billion US$2005/yr	96.934	108.783	161.978	224.577	318.495	449.369	612.719	806.995	1028.7	1271.41	1526.62	1788.65	2050.22	2316.78	2595.93	2875.34	3146.57	3404.95	3641.28
IIASA GDP	SSP1	TCD	GDP|PPP	billion US$2005/yr	13.1784	20.1884	24.775	30.8242	38.3086	48.2797	61.4796	78.4934	99.9188	126.122	157.355	193.601	234.541	281.727	334.958	392.728	452.186	510.885	566.947
IIASA GDP	SSP2	TCD	GDP|PPP	billion US$2005/yr	13.1784	19.23	22.3767	26.4541	31.5398	37.9752	45.9583	55.6512	67.3714	81.5647	98.6211	118.888	142.738	170.653	202.826	239.679	281.438	328.223	379.856
IIASA GDP	SSP3	TCD	GDP|PPP	billion US$2005/yr	13.1784	18.8282	21.1443	23.783	26.7455	30.0658	33.6472	37.3687	41.149	45.0365	49.0201	53.0857	57.1822	61.279	65.306	69.271	73.1959	77.0656	81.0146
IIASA GDP	SSP4	TCD	GDP|PPP	billion US$2005/yr	13.1784	18.7335	21.0357	23.8535	27.3757	31.7109	36.8852	42.8344	49.5408	57.1056	65.5484	74.8433	84.919	95.746	107.241	119.443	132.415	146.152	160.929
IIASA GDP	SSP5	TCD	GDP|PPP	billion US$2005/yr	13.1784	20.1923	24.9823	31.7017	40.6675	53.3714	71.1509	95.2942	127.18	167.88	218.282	278.804	349.186	432.034	527.1	631.849	741.271	854.939	980.662
OECD Env-Growth	SSP1	TCD	GDP|PPP	billion US$2005/yr	15.011	18.091	22.093	30.506	44.595	66.552	98.936	143.952	204.119	281.298	376.465	489.512	619.064	762.869	918.718	1083.25	1252.94	1424.93	1595.12
OECD Env-Growth	SSP2	TCD	GDP|PPP	billion US$2005/yr	15.011	18.284	21.949	28.606	38.514	52.216	71.418	97.472	132.359	177.992	236.385	309.778	400.613	510.77	641.148	792.675	965.735	1160.98	1378.63
OECD Env-Growth	SSP3	TCD	GDP|PPP	billion US$2005/yr	15.011	18.426	22.116	27.99	35.807	45.276	57.139	71.537	88.712	108.844	131.967	158.2	187.546	219.949	254.995	292.513	332.195	373.662	417.46
OECD Env-Growth	SSP4	TCD	GDP|PPP	billion US$2005/yr	15.011	18.401	22.013	27.671	35.079	43.603	53.958	66.154	80.285	96.392	114.394	134.335	156.162	179.786	204.872	231.34	259.045	287.828	318.272
OECD Env-Growth	SSP5	TCD	GDP|PPP	billion US$2005/yr	15.011	18.068	22.079	31.131	47.557	74.818	116.232	175.257	255.915	361.645	494.977	657.561	849.398	1069.43	1317.04	1589.57	1883.95	2197.74	2526.14
IIASA GDP	SSP1	TGO	GDP|PPP	billion US$2005/yr	4.69808	5.06247	5.73555	6.51918	7.59364	9.21865	11.7826	15.3917	20.0736	25.7143	32.447	40.4875	50.0976	61.4779	74.8467	89.9976	106.447	123.54	140.426
IIASA GDP	SSP2	TGO	GDP|PPP	billion US$2005/yr	4.69808	4.61665	4.82296	5.14198	5.76039	6.68538	8.09932	9.94838	12.1505	14.5918	17.2994	20.3652	23.9161	28.0983	33.062	38.9915	46.0909	54.5852	64.6677
IIASA GDP	SSP3	TGO	GDP|PPP	billion US$2005/yr	4.69808	4.53011	4.5822	4.65977	4.90337	5.25289	5.65951	6.23641	6.92285	7.66731	8.41263	9.16661	9.92707	10.6942	11.4722	12.2691	13.1025	13.9941	14.9526
IIASA GDP	SSP4	TGO	GDP|PPP	billion US$2005/yr	4.69808	4.52175	4.59951	4.75769	5.11892	5.67335	6.41724	7.36136	8.5078	9.85251	11.3853	13.1076	15.0252	17.1635	19.5541	22.2318	25.229	28.5949	32.3582
IIASA GDP	SSP5	TGO	GDP|PPP	billion US$2005/yr	4.69808	5.06805	5.80742	6.7737	8.20982	10.4688	14.1305	19.5362	26.9632	36.4917	48.5225	63.5723	82.2063	104.85	131.914	163.01	197.144	232.924	268.549
OECD Env-Growth	SSP1	TGO	GDP|PPP	billion US$2005/yr	5.414	6.842	9.058	12.561	18.017	26.371	38.662	56.07	79.746	110.599	149.179	195.465	248.887	308.344	373.023	441.043	511.01	581.68	651.142
OECD Env-Growth	SSP2	TGO	GDP|PPP	billion US$2005/yr	5.414	6.902	9.097	11.996	15.622	20.089	26.029	33.93	44.356	57.974	75.506	97.745	125.559	159.719	200.91	249.688	306.37	371.156	443.929
OECD Env-Growth	SSP3	TGO	GDP|PPP	billion US$2005/yr	5.414	6.913	9.103	11.661	14.372	17.106	20.306	24.07	28.424	33.396	39.01	45.335	52.4	60.219	68.747	77.916	87.726	98.259	109.528
OECD Env-Growth	SSP4	TGO	GDP|PPP	billion US$2005/yr	5.414	6.912	9.087	11.567	14.051	16.263	18.68	21.355	24.266	27.395	30.727	34.282	38.06	42.051	46.218	50.528	55.004	59.729	64.75
OECD Env-Growth	SSP5	TGO	GDP|PPP	billion US$2005/yr	5.414	6.841	9.095	13.019	19.823	31.083	48.205	73.112	107.772	153.933	212.957	285.526	371.579	470.303	581.344	702.611	832.637	970.043	1112.13
IIASA GDP	SSP1	THA	GDP|PPP	billion US$2005/yr	514.297	644.46	755.454	882.69	1024.28	1173.82	1343.76	1564.07	1807.48	2023.53	2169.56	2268.38	2350.5	2432.64	2514.79	2592.03	2658.8	2710.72	2745.5
IIASA GDP	SSP2	THA	GDP|PPP	billion US$2005/yr	514.297	643.009	743.893	852.824	972.159	1102.4	1257.83	1428.39	1627.72	1830.58	2013.5	2154.71	2263.97	2361.97	2463.02	2570.31	2681.42	2793.22	2903.17
IIASA GDP	SSP3	THA	GDP|PPP	billion US$2005/yr	514.297	639.83	724.085	800.701	875.677	955.06	1053.81	1164.67	1270.78	1361.24	1439.46	1513.32	1588.9	1670.63	1758.36	1851.54	1951.14	2058.72	2176.9
IIASA GDP	SSP4	THA	GDP|PPP	billion US$2005/yr	514.297	635.067	711.462	777.867	839.902	902.517	979.368	1061.27	1130.83	1174.5	1194.17	1196.1	1186.23	1169.04	1148.06	1123.5	1095.31	1064.51	1031.6
IIASA GDP	SSP5	THA	GDP|PPP	billion US$2005/yr	514.297	645.834	764.282	910.171	1084.62	1281.14	1512.02	1809.5	2142.97	2452.3	2726.27	2985.15	3249.2	3517.37	3784.07	4040.37	4277.46	4487.58	4665.57
OECD Env-Growth	SSP1	THA	GDP|PPP	billion US$2005/yr	530.367	649.827	834.959	1084.74	1399.69	1765.02	2151.68	2536.37	2899.33	3237.29	3544.51	3810.23	4026.03	4193.1	4318.59	4400.06	4440.54	4445.8	4416.4
OECD Env-Growth	SSP2	THA	GDP|PPP	billion US$2005/yr	530.367	651.168	834.091	1054.52	1298.9	1555.62	1825.87	2105.24	2389.52	2678.18	2967.92	3250.61	3523.13	3786.07	4035.91	4264.46	4473.98	4663.63	4836.2
OECD Env-Growth	SSP3	THA	GDP|PPP	billion US$2005/yr	530.367	652.046	829.287	1012.98	1184.01	1326.85	1455.36	1571.32	1678.96	1783.86	1889	1995.14	2105.41	2223.37	2344.89	2466.47	2589.32	2715.55	2849.27
[truncated: 239 more rows]

## Sheet: ISO3
ABW	Aruba					ABW
AFG	Afghanistan					AFG
AGO	Angola					AGO
AIA	Anguilla					AIA
ALA	Åland	Islands				ALA
ALB	Albania					ALB
AND	Andorra					AND
[truncated: 239 more rows]

## Sheet: ISO3_2.0
Afghanistan	AFG
[truncated: 248 more rows]

[truncated: 26 more sheets: MAC-EU, MACS-nonEU, Alphas, USA, EU, FRA, GER, BLX, GBR, SEU, SCAN, EEU, CAN, JPN, KOR, RUS, CHN, IND, BRA, REU …]
